# Supplementary material for: Coordination of cell cycle and morphogenesis during organ formation
Source: eLife. 2024 Jan 26;13:e95830. doi: 10.7554/eLife.95830 (PMC10869137; doi:10.7554/eLife.95830)
Supplement: Supplementary file 3. [file elife-95830-supp3.xlsx]

## Sheet: Droidb_all data
Gen1	Gene2	Symbol1	Symbol2	Table Names	Weighted Correlation	Confidence	Gene Symbol (PDI: Transcription factor-Gene)	TF Symbol (PDI: Transcription factor-Gene)	PubMed Id (PDI: Transcription factor-Gene)	PubMed URL (PDI: Transcription factor-Gene)	Factor URL (PDI: Transcription factor-Gene)	PMID Methods (PDI: Transcription factor-Gene)	Interaction Detection Methods (PDI: Transcription factor-Gene)	Original interaction source (PDI: Transcription factor-Gene)	Data source URL (PDI: Transcription factor-Gene)	Date Last updated (PDI: Transcription factor-Gene)	Interaction Type (PDI: Transcription factor-Gene)
FBgn0261434	FBgn0005585	hkb	Calr	PDI: Transcription factor-Gene	0.1416	-	Calr	hkb	21177974	http://www.ncbi.nlm.nih.gov/sites/entrez?cmd=retrieve&db=pubmed&list_uids=21177974&dopt=DocSum	http://www.modencode.org/White.shtml	21177974(MI:0225(ChIP-chip) and ChIP-seq)	null	modENCODE-24-JAN-11	http://www.modencode.org/White.shtml	2014-10-01	pd
FBgn0261434	FBgn0265434	hkb	zip	PDI: Transcription factor-Gene	-0.0798	-	zip	hkb	21177974	http://www.ncbi.nlm.nih.gov/sites/entrez?cmd=retrieve&db=pubmed&list_uids=21177974&dopt=DocSum	http://www.modencode.org/White.shtml	21177974(MI:0225(ChIP-chip) and ChIP-seq)	null	modENCODE-24-JAN-11	http://www.modencode.org/White.shtml	2014-10-01	pd
FBgn0261434	FBgn0015789	hkb	Rab10	PDI: Transcription factor-Gene	0.242	-	Rab10	hkb	21177974	http://www.ncbi.nlm.nih.gov/sites/entrez?cmd=retrieve&db=pubmed&list_uids=21177974&dopt=DocSum	http://www.modencode.org/White.shtml	21177974(MI:0225(ChIP-chip) and ChIP-seq)	null	modENCODE-24-JAN-11	http://www.modencode.org/White.shtml	2014-10-01	pd
FBgn0261434	FBgn0027835	hkb	Dp1	PDI: Transcription factor-Gene	0.1996	-	Dp1	hkb	21177974	http://www.ncbi.nlm.nih.gov/sites/entrez?cmd=retrieve&db=pubmed&list_uids=21177974&dopt=DocSum	http://www.modencode.org/White.shtml	21177974(MI:0225(ChIP-chip) and ChIP-seq)	null	modENCODE-24-JAN-11	http://www.modencode.org/White.shtml	2014-10-01	pd
FBgn0261434	FBgn0052590	hkb	CG32590	PDI: Transcription factor-Gene	0.6023	-	CG32590	hkb	21177974	http://www.ncbi.nlm.nih.gov/sites/entrez?cmd=retrieve&db=pubmed&list_uids=21177974&dopt=DocSum	http://www.modencode.org/White.shtml	21177974(MI:0225(ChIP-chip) and ChIP-seq)	null	modENCODE-24-JAN-11	http://www.modencode.org/White.shtml	2014-10-01	pd
FBgn0261434	FBgn0012344	hkb	Dh44	PDI: Transcription factor-Gene	-0.467	-	Dh44	hkb	21177974	http://www.ncbi.nlm.nih.gov/sites/entrez?cmd=retrieve&db=pubmed&list_uids=21177974&dopt=DocSum	http://www.modencode.org/White.shtml	21177974(MI:0225(ChIP-chip) and ChIP-seq)	null	modENCODE-24-JAN-11	http://www.modencode.org/White.shtml	2014-10-01	pd
FBgn0261434	FBgn0039266	hkb	CG11791	PDI: Transcription factor-Gene	-0.0012	-	CG11791	hkb	21177974	http://www.ncbi.nlm.nih.gov/sites/entrez?cmd=retrieve&db=pubmed&list_uids=21177974&dopt=DocSum	http://www.modencode.org/White.shtml	21177974(MI:0225(ChIP-chip) and ChIP-seq)	null	modENCODE-24-JAN-11	http://www.modencode.org/White.shtml	2014-10-01	pd
FBgn0261434	FBgn0264598	hkb	PsGEF	PDI: Transcription factor-Gene	0.2963	-	PsGEF	hkb	21177974	http://www.ncbi.nlm.nih.gov/sites/entrez?cmd=retrieve&db=pubmed&list_uids=21177974&dopt=DocSum	http://www.modencode.org/White.shtml	21177974(MI:0225(ChIP-chip) and ChIP-seq)	null	modENCODE-24-JAN-11	http://www.modencode.org/White.shtml	2014-10-01	pd
FBgn0261434	FBgn0030088	hkb	Arfrp1	PDI: Transcription factor-Gene	0.2202	-	Arfrp1	hkb	21177974	http://www.ncbi.nlm.nih.gov/sites/entrez?cmd=retrieve&db=pubmed&list_uids=21177974&dopt=DocSum	http://www.modencode.org/White.shtml	21177974(MI:0225(ChIP-chip) and ChIP-seq)	null	modENCODE-24-JAN-11	http://www.modencode.org/White.shtml	2014-10-01	pd
FBgn0261434	FBgn0025608	hkb	Faf2	PDI: Transcription factor-Gene	-0.4138	-	Faf2	hkb	21177974	http://www.ncbi.nlm.nih.gov/sites/entrez?cmd=retrieve&db=pubmed&list_uids=21177974&dopt=DocSum	http://www.modencode.org/White.shtml	21177974(MI:0225(ChIP-chip) and ChIP-seq)	null	modENCODE-24-JAN-11	http://www.modencode.org/White.shtml	2014-10-01	pd
FBgn0261434	FBgn0030873	hkb	CG15814	PDI: Transcription factor-Gene	0.2437	-	CG15814	hkb	21177974	http://www.ncbi.nlm.nih.gov/sites/entrez?cmd=retrieve&db=pubmed&list_uids=21177974&dopt=DocSum	http://www.modencode.org/White.shtml	21177974(MI:0225(ChIP-chip) and ChIP-seq)	null	modENCODE-24-JAN-11	http://www.modencode.org/White.shtml	2014-10-01	pd
FBgn0261434	FBgn0036935	hkb	CG14186	PDI: Transcription factor-Gene	0.0902	-	CG14186	hkb	21177974	http://www.ncbi.nlm.nih.gov/sites/entrez?cmd=retrieve&db=pubmed&list_uids=21177974&dopt=DocSum	http://www.modencode.org/White.shtml	21177974(MI:0225(ChIP-chip) and ChIP-seq)	null	modENCODE-24-JAN-11	http://www.modencode.org/White.shtml	2014-10-01	pd
FBgn0261434	FBgn0032940	hkb	Mondo	PDI: Transcription factor-Gene	-0.1887	-	Mondo	hkb	21177974	http://www.ncbi.nlm.nih.gov/sites/entrez?cmd=retrieve&db=pubmed&list_uids=21177974&dopt=DocSum	http://www.modencode.org/White.shtml	21177974(MI:0225(ChIP-chip) and ChIP-seq)	null	modENCODE-24-JAN-11	http://www.modencode.org/White.shtml	2014-10-01	pd
FBgn0261434	FBgn0030089	hkb	AP-1gamma	PDI: Transcription factor-Gene	0.0892	-	AP-1Œ≥	hkb	21177974	http://www.ncbi.nlm.nih.gov/sites/entrez?cmd=retrieve&db=pubmed&list_uids=21177974&dopt=DocSum	http://www.modencode.org/White.shtml	21177974(MI:0225(ChIP-chip) and ChIP-seq)	null	modENCODE-24-JAN-11	http://www.modencode.org/White.shtml	2014-10-01	pd
FBgn0261434	FBgn0030870	hkb	CG6398	PDI: Transcription factor-Gene	0.3294	-	CG6398	hkb	21177974	http://www.ncbi.nlm.nih.gov/sites/entrez?cmd=retrieve&db=pubmed&list_uids=21177974&dopt=DocSum	http://www.modencode.org/White.shtml	21177974(MI:0225(ChIP-chip) and ChIP-seq)	null	modENCODE-24-JAN-11	http://www.modencode.org/White.shtml	2014-10-01	pd
FBgn0261434	FBgn0030869	hkb	Socs16D	PDI: Transcription factor-Gene	0.0184	-	Socs16D	hkb	21177974	http://www.ncbi.nlm.nih.gov/sites/entrez?cmd=retrieve&db=pubmed&list_uids=21177974&dopt=DocSum	http://www.modencode.org/White.shtml	21177974(MI:0225(ChIP-chip) and ChIP-seq)	null	modENCODE-24-JAN-11	http://www.modencode.org/White.shtml	2014-10-01	pd
FBgn0261434	FBgn0043001	hkb	Chrac-16	PDI: Transcription factor-Gene	0.7359	-	Chrac-16	hkb	21177974	http://www.ncbi.nlm.nih.gov/sites/entrez?cmd=retrieve&db=pubmed&list_uids=21177974&dopt=DocSum	http://www.modencode.org/White.shtml	21177974(MI:0225(ChIP-chip) and ChIP-seq)	null	modENCODE-24-JAN-11	http://www.modencode.org/White.shtml	2014-10-01	pd
FBgn0261434	FBgn0030723	hkb	dpr18	PDI: Transcription factor-Gene	0.1141	-	dpr18	hkb	21177974	http://www.ncbi.nlm.nih.gov/sites/entrez?cmd=retrieve&db=pubmed&list_uids=21177974&dopt=DocSum	http://www.modencode.org/White.shtml	21177974(MI:0225(ChIP-chip) and ChIP-seq)	null	modENCODE-24-JAN-11	http://www.modencode.org/White.shtml	2014-10-01	pd
FBgn0261434	FBgn0039466	hkb	CG5521	PDI: Transcription factor-Gene	-0.0482	-	CG5521	hkb	21177974	http://www.ncbi.nlm.nih.gov/sites/entrez?cmd=retrieve&db=pubmed&list_uids=21177974&dopt=DocSum	http://www.modencode.org/White.shtml	21177974(MI:0225(ChIP-chip) and ChIP-seq)	null	modENCODE-24-JAN-11	http://www.modencode.org/White.shtml	2014-10-01	pd
FBgn0261434	FBgn0039465	hkb	Tsp97E	PDI: Transcription factor-Gene	0.6482	-	Tsp97E	hkb	21177974	http://www.ncbi.nlm.nih.gov/sites/entrez?cmd=retrieve&db=pubmed&list_uids=21177974&dopt=DocSum	http://www.modencode.org/White.shtml	21177974(MI:0225(ChIP-chip) and ChIP-seq)	null	modENCODE-24-JAN-11	http://www.modencode.org/White.shtml	2014-10-01	pd
FBgn0004110	FBgn0261434	tin	hkb	PDI: Transcription factor-Gene	0.4621	-	hkb	tin	21177974	http://www.ncbi.nlm.nih.gov/sites/entrez?cmd=retrieve&db=pubmed&list_uids=21177974&dopt=DocSum	http://www.modencode.org/White.shtml	21177974(MI:0225(ChIP-chip) and ChIP-seq)	null	modENCODE-24-JAN-11	http://www.modencode.org/White.shtml	2014-10-01	pd
FBgn0261434	FBgn0015777	hkb	nrv2	PDI: Transcription factor-Gene	0.3693	-	nrv2	hkb	21177974	http://www.ncbi.nlm.nih.gov/sites/entrez?cmd=retrieve&db=pubmed&list_uids=21177974&dopt=DocSum	http://www.modencode.org/White.shtml	21177974(MI:0225(ChIP-chip) and ChIP-seq)	null	modENCODE-24-JAN-11	http://www.modencode.org/White.shtml	2014-10-01	pd
FBgn0261434	FBgn0030090	hkb	fend	PDI: Transcription factor-Gene	0.6587	-	fend	hkb	21177974	http://www.ncbi.nlm.nih.gov/sites/entrez?cmd=retrieve&db=pubmed&list_uids=21177974&dopt=DocSum	http://www.modencode.org/White.shtml	21177974(MI:0225(ChIP-chip) and ChIP-seq)	null	modENCODE-24-JAN-11	http://www.modencode.org/White.shtml	2014-10-01	pd
FBgn0261434	FBgn0039254	hkb	Nmnat	PDI: Transcription factor-Gene	-0.6284	-	Nmnat	hkb	21177974	http://www.ncbi.nlm.nih.gov/sites/entrez?cmd=retrieve&db=pubmed&list_uids=21177974&dopt=DocSum	http://www.modencode.org/White.shtml	21177974(MI:0225(ChIP-chip) and ChIP-seq)	null	modENCODE-24-JAN-11	http://www.modencode.org/White.shtml	2014-10-01	pd
FBgn0261434	FBgn0027841	hkb	CstF64	PDI: Transcription factor-Gene	0.7047	-	CstF-64	hkb	21177974	http://www.ncbi.nlm.nih.gov/sites/entrez?cmd=retrieve&db=pubmed&list_uids=21177974&dopt=DocSum	http://www.modencode.org/White.shtml	21177974(MI:0225(ChIP-chip) and ChIP-seq)	null	modENCODE-24-JAN-11	http://www.modencode.org/White.shtml	2014-10-01	pd
FBgn0261434	FBgn0026144	hkb	CBP	PDI: Transcription factor-Gene	0.1841	-	CBP	hkb	21177974	http://www.ncbi.nlm.nih.gov/sites/entrez?cmd=retrieve&db=pubmed&list_uids=21177974&dopt=DocSum	http://www.modencode.org/White.shtml	21177974(MI:0225(ChIP-chip) and ChIP-seq)	null	modENCODE-24-JAN-11	http://www.modencode.org/White.shtml	2014-10-01	pd
FBgn0261434	FBgn0039259	hkb	CG11781	PDI: Transcription factor-Gene	0.4411	-	CG11781	hkb	21177974	http://www.ncbi.nlm.nih.gov/sites/entrez?cmd=retrieve&db=pubmed&list_uids=21177974&dopt=DocSum	http://www.modencode.org/White.shtml	21177974(MI:0225(ChIP-chip) and ChIP-seq)	null	modENCODE-24-JAN-11	http://www.modencode.org/White.shtml	2014-10-01	pd
FBgn0261434	FBgn0052581	hkb	CG32581	PDI: Transcription factor-Gene	-0.1369	-	CG32581	hkb	21177974	http://www.ncbi.nlm.nih.gov/sites/entrez?cmd=retrieve&db=pubmed&list_uids=21177974&dopt=DocSum	http://www.modencode.org/White.shtml	21177974(MI:0225(ChIP-chip) and ChIP-seq)	null	modENCODE-24-JAN-11	http://www.modencode.org/White.shtml	2014-10-01	pd
FBgn0261434	FBgn0052582	hkb	lncRNA:CR32582	PDI: Transcription factor-Gene	-0.2384	-	CR32582	hkb	21177974	http://www.ncbi.nlm.nih.gov/sites/entrez?cmd=retrieve&db=pubmed&list_uids=21177974&dopt=DocSum	http://www.modencode.org/White.shtml	21177974(MI:0225(ChIP-chip) and ChIP-seq)	null	modENCODE-24-JAN-11	http://www.modencode.org/White.shtml	2014-10-01	pd
FBgn0261434	FBgn0035152	hkb	CG3386	PDI: Transcription factor-Gene	0.5371	-	CG3386	hkb	21177974	http://www.ncbi.nlm.nih.gov/sites/entrez?cmd=retrieve&db=pubmed&list_uids=21177974&dopt=DocSum	http://www.modencode.org/White.shtml	21177974(MI:0225(ChIP-chip) and ChIP-seq)	null	modENCODE-24-JAN-11	http://www.modencode.org/White.shtml	2014-10-01	pd
FBgn0261434	FBgn0026148	hkb	CG12253	PDI: Transcription factor-Gene	0.5959	-	CG12253	hkb	21177974	http://www.ncbi.nlm.nih.gov/sites/entrez?cmd=retrieve&db=pubmed&list_uids=21177974&dopt=DocSum	http://www.modencode.org/White.shtml	21177974(MI:0225(ChIP-chip) and ChIP-seq)	null	modENCODE-24-JAN-11	http://www.modencode.org/White.shtml	2014-10-01	pd
FBgn0261434	FBgn0035151	hkb	CG17129	PDI: Transcription factor-Gene	0.35	-	CG17129	hkb	21177974	http://www.ncbi.nlm.nih.gov/sites/entrez?cmd=retrieve&db=pubmed&list_uids=21177974&dopt=DocSum	http://www.modencode.org/White.shtml	21177974(MI:0225(ChIP-chip) and ChIP-seq)	null	modENCODE-24-JAN-11	http://www.modencode.org/White.shtml	2014-10-01	pd
FBgn0261434	FBgn0032943	hkb	Tsp39D	PDI: Transcription factor-Gene	0.1515	-	Tsp39D	hkb	21177974	http://www.ncbi.nlm.nih.gov/sites/entrez?cmd=retrieve&db=pubmed&list_uids=21177974&dopt=DocSum	http://www.modencode.org/White.shtml	21177974(MI:0225(ChIP-chip) and ChIP-seq)	null	modENCODE-24-JAN-11	http://www.modencode.org/White.shtml	2014-10-01	pd
FBgn0261434	FBgn0001330	hkb	kz	PDI: Transcription factor-Gene	0.462	-	kz	hkb	21177974	http://www.ncbi.nlm.nih.gov/sites/entrez?cmd=retrieve&db=pubmed&list_uids=21177974&dopt=DocSum	http://www.modencode.org/White.shtml	21177974(MI:0225(ChIP-chip) and ChIP-seq)	null	modENCODE-24-JAN-11	http://www.modencode.org/White.shtml	2014-10-01	pd
FBgn0261434	FBgn0004573	hkb	5-HT7	PDI: Transcription factor-Gene	-0.1066	-	5-HT7	hkb	21177974	http://www.ncbi.nlm.nih.gov/sites/entrez?cmd=retrieve&db=pubmed&list_uids=21177974&dopt=DocSum	http://www.modencode.org/White.shtml	21177974(MI:0225(ChIP-chip) and ChIP-seq)	null	modENCODE-24-JAN-11	http://www.modencode.org/White.shtml	2014-10-01	pd
FBgn0261434	FBgn0002466	hkb	sti	PDI: Transcription factor-Gene	0.7208	-	sti	hkb	21177974	http://www.ncbi.nlm.nih.gov/sites/entrez?cmd=retrieve&db=pubmed&list_uids=21177974&dopt=DocSum	http://www.modencode.org/White.shtml	21177974(MI:0225(ChIP-chip) and ChIP-seq)	null	modENCODE-24-JAN-11	http://www.modencode.org/White.shtml	2014-10-01	pd
FBgn0261434	FBgn0034033	hkb	CG8204	PDI: Transcription factor-Gene	0.0494	-	CG8204	hkb	21177974	http://www.ncbi.nlm.nih.gov/sites/entrez?cmd=retrieve&db=pubmed&list_uids=21177974&dopt=DocSum	http://www.modencode.org/White.shtml	21177974(MI:0225(ChIP-chip) and ChIP-seq)	null	modENCODE-24-JAN-11	http://www.modencode.org/White.shtml	2014-10-01	pd
FBgn0261434	FBgn0035978	hkb	UGP	PDI: Transcription factor-Gene	-0.2603	-	UGP	hkb	21177974	http://www.ncbi.nlm.nih.gov/sites/entrez?cmd=retrieve&db=pubmed&list_uids=21177974&dopt=DocSum	http://www.modencode.org/White.shtml	21177974(MI:0225(ChIP-chip) and ChIP-seq)	null	modENCODE-24-JAN-11	http://www.modencode.org/White.shtml	2014-10-01	pd
FBgn0261434	FBgn0035953	hkb	CG5087	PDI: Transcription factor-Gene	0.1625	-	CG5087	hkb	21177974	http://www.ncbi.nlm.nih.gov/sites/entrez?cmd=retrieve&db=pubmed&list_uids=21177974&dopt=DocSum	http://www.modencode.org/White.shtml	21177974(MI:0225(ChIP-chip) and ChIP-seq)	null	modENCODE-24-JAN-11	http://www.modencode.org/White.shtml	2014-10-01	pd
FBgn0261434	FBgn0265413	hkb	CG44325	PDI: Transcription factor-Gene	-0.3029	-	CG44325	hkb	21177974	http://www.ncbi.nlm.nih.gov/sites/entrez?cmd=retrieve&db=pubmed&list_uids=21177974&dopt=DocSum	http://www.modencode.org/White.shtml	21177974(MI:0225(ChIP-chip) and ChIP-seq)	null	modENCODE-24-JAN-11	http://www.modencode.org/White.shtml	2014-10-01	pd
FBgn0261434	FBgn0035955	hkb	CG5194	PDI: Transcription factor-Gene	-0.2083	-	CG5194	hkb	21177974	http://www.ncbi.nlm.nih.gov/sites/entrez?cmd=retrieve&db=pubmed&list_uids=21177974&dopt=DocSum	http://www.modencode.org/White.shtml	21177974(MI:0225(ChIP-chip) and ChIP-seq)	null	modENCODE-24-JAN-11	http://www.modencode.org/White.shtml	2014-10-01	pd
FBgn0261434	FBgn0037102	hkb	CRIF	PDI: Transcription factor-Gene	0.4067	-	CRIF	hkb	21177974	http://www.ncbi.nlm.nih.gov/sites/entrez?cmd=retrieve&db=pubmed&list_uids=21177974&dopt=DocSum	http://www.modencode.org/White.shtml	21177974(MI:0225(ChIP-chip) and ChIP-seq)	null	modENCODE-24-JAN-11	http://www.modencode.org/White.shtml	2014-10-01	pd
FBgn0261434	FBgn0052576	hkb	CG32576	PDI: Transcription factor-Gene	-0.0277	-	CG32576	hkb	21177974	http://www.ncbi.nlm.nih.gov/sites/entrez?cmd=retrieve&db=pubmed&list_uids=21177974&dopt=DocSum	http://www.modencode.org/White.shtml	21177974(MI:0225(ChIP-chip) and ChIP-seq)	null	modENCODE-24-JAN-11	http://www.modencode.org/White.shtml	2014-10-01	pd
FBgn0261434	FBgn0030893	hkb	RhoGAP16F	PDI: Transcription factor-Gene	0.1538	-	RhoGAP16F	hkb	21177974	http://www.ncbi.nlm.nih.gov/sites/entrez?cmd=retrieve&db=pubmed&list_uids=21177974&dopt=DocSum	http://www.modencode.org/White.shtml	21177974(MI:0225(ChIP-chip) and ChIP-seq)	null	modENCODE-24-JAN-11	http://www.modencode.org/White.shtml	2014-10-01	pd
FBgn0261434	FBgn0036918	hkb	Pfdn6	PDI: Transcription factor-Gene	0.1334	-	CG7770	hkb	21177974	http://www.ncbi.nlm.nih.gov/sites/entrez?cmd=retrieve&db=pubmed&list_uids=21177974&dopt=DocSum	http://www.modencode.org/White.shtml	21177974(MI:0225(ChIP-chip) and ChIP-seq)	null	modENCODE-24-JAN-11	http://www.modencode.org/White.shtml	2014-10-01	pd
FBgn0261434	FBgn0027621	hkb	Pfrx	PDI: Transcription factor-Gene	-0.1726	-	Pfrx	hkb	21177974	http://www.ncbi.nlm.nih.gov/sites/entrez?cmd=retrieve&db=pubmed&list_uids=21177974&dopt=DocSum	http://www.modencode.org/White.shtml	21177974(MI:0225(ChIP-chip) and ChIP-seq)	null	modENCODE-24-JAN-11	http://www.modencode.org/White.shtml	2014-10-01	pd
FBgn0261434	FBgn0032916	hkb	CG9257	PDI: Transcription factor-Gene	0.1555	-	CG9257	hkb	21177974	http://www.ncbi.nlm.nih.gov/sites/entrez?cmd=retrieve&db=pubmed&list_uids=21177974&dopt=DocSum	http://www.modencode.org/White.shtml	21177974(MI:0225(ChIP-chip) and ChIP-seq)	null	modENCODE-24-JAN-11	http://www.modencode.org/White.shtml	2014-10-01	pd
FBgn0261434	FBgn0001320	hkb	kni	PDI: Transcription factor-Gene	0.408	-	kni	hkb	21177974	http://www.ncbi.nlm.nih.gov/sites/entrez?cmd=retrieve&db=pubmed&list_uids=21177974&dopt=DocSum	http://www.modencode.org/White.shtml	21177974(MI:0225(ChIP-chip) and ChIP-seq)	null	modENCODE-24-JAN-11	http://www.modencode.org/White.shtml	2014-10-01	pd
FBgn0261434	FBgn0030701	hkb	CG16952	PDI: Transcription factor-Gene	0.5069	-	CG16952	hkb	21177974	http://www.ncbi.nlm.nih.gov/sites/entrez?cmd=retrieve&db=pubmed&list_uids=21177974&dopt=DocSum	http://www.modencode.org/White.shtml	21177974(MI:0225(ChIP-chip) and ChIP-seq)	null	modENCODE-24-JAN-11	http://www.modencode.org/White.shtml	2014-10-01	pd
FBgn0261434	FBgn0264978	hkb	Slh	PDI: Transcription factor-Gene	0.1082	-	Slh	hkb	21177974	http://www.ncbi.nlm.nih.gov/sites/entrez?cmd=retrieve&db=pubmed&list_uids=21177974&dopt=DocSum	http://www.modencode.org/White.shtml	21177974(MI:0225(ChIP-chip) and ChIP-seq)	null	modENCODE-24-JAN-11	http://www.modencode.org/White.shtml	2014-10-01	pd
FBgn0261434	FBgn0015756	hkb	RpL9	PDI: Transcription factor-Gene	0.0767	-	RpL9	hkb	21177974	http://www.ncbi.nlm.nih.gov/sites/entrez?cmd=retrieve&db=pubmed&list_uids=21177974&dopt=DocSum	http://www.modencode.org/White.shtml	21177974(MI:0225(ChIP-chip) and ChIP-seq)	null	modENCODE-24-JAN-11	http://www.modencode.org/White.shtml	2014-10-01	pd
FBgn0261434	FBgn0030073	hkb	CG10962	PDI: Transcription factor-Gene	-0.3107	-	CG10962	hkb	21177974	http://www.ncbi.nlm.nih.gov/sites/entrez?cmd=retrieve&db=pubmed&list_uids=21177974&dopt=DocSum	http://www.modencode.org/White.shtml	21177974(MI:0225(ChIP-chip) and ChIP-seq)	null	modENCODE-24-JAN-11	http://www.modencode.org/White.shtml	2014-10-01	pd
FBgn0261434	FBgn0015754	hkb	Lis-1	PDI: Transcription factor-Gene	0.5987	-	Lis-1	hkb	21177974	http://www.ncbi.nlm.nih.gov/sites/entrez?cmd=retrieve&db=pubmed&list_uids=21177974&dopt=DocSum	http://www.modencode.org/White.shtml	21177974(MI:0225(ChIP-chip) and ChIP-seq)	null	modENCODE-24-JAN-11	http://www.modencode.org/White.shtml	2014-10-01	pd
FBgn0261434	FBgn0264785	hkb	Hph	PDI: Transcription factor-Gene	0.2466	-	Hph	hkb	21177974	http://www.ncbi.nlm.nih.gov/sites/entrez?cmd=retrieve&db=pubmed&list_uids=21177974&dopt=DocSum	http://www.modencode.org/White.shtml	21177974(MI:0225(ChIP-chip) and ChIP-seq)	null	modENCODE-24-JAN-11	http://www.modencode.org/White.shtml	2014-10-01	pd
FBgn0261434	FBgn0035300	hkb	CG1139	PDI: Transcription factor-Gene	-0.1953	-	CG1139	hkb	21177974	http://www.ncbi.nlm.nih.gov/sites/entrez?cmd=retrieve&db=pubmed&list_uids=21177974&dopt=DocSum	http://www.modencode.org/White.shtml	21177974(MI:0225(ChIP-chip) and ChIP-seq)	null	modENCODE-24-JAN-11	http://www.modencode.org/White.shtml	2014-10-01	pd
FBgn0261434	FBgn0032723	hkb	ssp3	PDI: Transcription factor-Gene	0.3753	-	ssp3	hkb	21177974	http://www.ncbi.nlm.nih.gov/sites/entrez?cmd=retrieve&db=pubmed&list_uids=21177974&dopt=DocSum	http://www.modencode.org/White.shtml	21177974(MI:0225(ChIP-chip) and ChIP-seq)	null	modENCODE-24-JAN-11	http://www.modencode.org/White.shtml	2014-10-01	pd
FBgn0261434	FBgn0033179	hkb	p47	PDI: Transcription factor-Gene	-0.0375	-	p47	hkb	21177974	http://www.ncbi.nlm.nih.gov/sites/entrez?cmd=retrieve&db=pubmed&list_uids=21177974&dopt=DocSum	http://www.modencode.org/White.shtml	21177974(MI:0225(ChIP-chip) and ChIP-seq)	null	modENCODE-24-JAN-11	http://www.modencode.org/White.shtml	2014-10-01	pd
FBgn0261434	FBgn0033581	hkb	CG12391	PDI: Transcription factor-Gene	0.6844	-	CG12391	hkb	21177974	http://www.ncbi.nlm.nih.gov/sites/entrez?cmd=retrieve&db=pubmed&list_uids=21177974&dopt=DocSum	http://www.modencode.org/White.shtml	21177974(MI:0225(ChIP-chip) and ChIP-seq)	null	modENCODE-24-JAN-11	http://www.modencode.org/White.shtml	2014-10-01	pd
FBgn0261434	FBgn0030874	hkb	Spt7	PDI: Transcription factor-Gene	0.5653	-	Spt7	hkb	21177974	http://www.ncbi.nlm.nih.gov/sites/entrez?cmd=retrieve&db=pubmed&list_uids=21177974&dopt=DocSum	http://www.modencode.org/White.shtml	21177974(MI:0225(ChIP-chip) and ChIP-seq)	null	modENCODE-24-JAN-11	http://www.modencode.org/White.shtml	2014-10-01	pd
FBgn0261434	FBgn0036063	hkb	CG6674	PDI: Transcription factor-Gene	0.3211	-	CG6674	hkb	21177974	http://www.ncbi.nlm.nih.gov/sites/entrez?cmd=retrieve&db=pubmed&list_uids=21177974&dopt=DocSum	http://www.modencode.org/White.shtml	21177974(MI:0225(ChIP-chip) and ChIP-seq)	null	modENCODE-24-JAN-11	http://www.modencode.org/White.shtml	2014-10-01	pd
FBgn0261434	FBgn0001316	hkb	klar	PDI: Transcription factor-Gene	0.2935	-	klar	hkb	21177974	http://www.ncbi.nlm.nih.gov/sites/entrez?cmd=retrieve&db=pubmed&list_uids=21177974&dopt=DocSum	http://www.modencode.org/White.shtml	21177974(MI:0225(ChIP-chip) and ChIP-seq)	null	modENCODE-24-JAN-11	http://www.modencode.org/White.shtml	2014-10-01	pd
FBgn0261434	FBgn0261356	hkb	CG42633	PDI: Transcription factor-Gene	-	-	CG42633	hkb	21177974	http://www.ncbi.nlm.nih.gov/sites/entrez?cmd=retrieve&db=pubmed&list_uids=21177974&dopt=DocSum	http://www.modencode.org/White.shtml	21177974(MI:0225(ChIP-chip) and ChIP-seq)	null	modENCODE-24-JAN-11	http://www.modencode.org/White.shtml	2014-10-01	pd
FBgn0261434	FBgn0250868	hkb	CG42239	PDI: Transcription factor-Gene	-0.1457	-	CG42239	hkb	21177974	http://www.ncbi.nlm.nih.gov/sites/entrez?cmd=retrieve&db=pubmed&list_uids=21177974&dopt=DocSum	http://www.modencode.org/White.shtml	21177974(MI:0225(ChIP-chip) and ChIP-seq)	null	modENCODE-24-JAN-11	http://www.modencode.org/White.shtml	2014-10-01	pd
FBgn0261434	FBgn0034054	hkb	CG8366	PDI: Transcription factor-Gene	0.4029	-	CG8366	hkb	21177974	http://www.ncbi.nlm.nih.gov/sites/entrez?cmd=retrieve&db=pubmed&list_uids=21177974&dopt=DocSum	http://www.modencode.org/White.shtml	21177974(MI:0225(ChIP-chip) and ChIP-seq)	null	modENCODE-24-JAN-11	http://www.modencode.org/White.shtml	2014-10-01	pd
FBgn0261434	FBgn0259923	hkb	Sep4	PDI: Transcription factor-Gene	0.6431	-	2004-09-01	hkb	21177974	http://www.ncbi.nlm.nih.gov/sites/entrez?cmd=retrieve&db=pubmed&list_uids=21177974&dopt=DocSum	http://www.modencode.org/White.shtml	21177974(MI:0225(ChIP-chip) and ChIP-seq)	null	modENCODE-24-JAN-11	http://www.modencode.org/White.shtml	2014-10-01	pd
FBgn0261434	FBgn0019972	hkb	Drice	PDI: Transcription factor-Gene	0.4957	-	Drice	hkb	21177974	http://www.ncbi.nlm.nih.gov/sites/entrez?cmd=retrieve&db=pubmed&list_uids=21177974&dopt=DocSum	http://www.modencode.org/White.shtml	21177974(MI:0225(ChIP-chip) and ChIP-seq)	null	modENCODE-24-JAN-11	http://www.modencode.org/White.shtml	2014-10-01	pd
FBgn0261434	FBgn0036090	hkb	CG8009	PDI: Transcription factor-Gene	0.4975	-	CG8009	hkb	21177974	http://www.ncbi.nlm.nih.gov/sites/entrez?cmd=retrieve&db=pubmed&list_uids=21177974&dopt=DocSum	http://www.modencode.org/White.shtml	21177974(MI:0225(ChIP-chip) and ChIP-seq)	null	modENCODE-24-JAN-11	http://www.modencode.org/White.shtml	2014-10-01	pd
FBgn0261434	FBgn0016660	hkb	H15	PDI: Transcription factor-Gene	-0.2353	-	H15	hkb	21177974	http://www.ncbi.nlm.nih.gov/sites/entrez?cmd=retrieve&db=pubmed&list_uids=21177974&dopt=DocSum	http://www.modencode.org/White.shtml	21177974(MI:0225(ChIP-chip) and ChIP-seq)	null	modENCODE-24-JAN-11	http://www.modencode.org/White.shtml	2014-10-01	pd
FBgn0261434	FBgn0001104	hkb	Galphai	PDI: Transcription factor-Gene	0.6666	-	GŒ±i	hkb	21177974	http://www.ncbi.nlm.nih.gov/sites/entrez?cmd=retrieve&db=pubmed&list_uids=21177974&dopt=DocSum	http://www.modencode.org/White.shtml	21177974(MI:0225(ChIP-chip) and ChIP-seq)	null	modENCODE-24-JAN-11	http://www.modencode.org/White.shtml	2014-10-01	pd
FBgn0261434	FBgn0038961	hkb	CG13850	PDI: Transcription factor-Gene	-0.1087	-	CG13850	hkb	21177974	http://www.ncbi.nlm.nih.gov/sites/entrez?cmd=retrieve&db=pubmed&list_uids=21177974&dopt=DocSum	http://www.modencode.org/White.shtml	21177974(MI:0225(ChIP-chip) and ChIP-seq)	null	modENCODE-24-JAN-11	http://www.modencode.org/White.shtml	2014-10-01	pd
FBgn0261434	FBgn0037363	hkb	Atg17	PDI: Transcription factor-Gene	0.2056	-	Atg17	hkb	21177974	http://www.ncbi.nlm.nih.gov/sites/entrez?cmd=retrieve&db=pubmed&list_uids=21177974&dopt=DocSum	http://www.modencode.org/White.shtml	21177974(MI:0225(ChIP-chip) and ChIP-seq)	null	modENCODE-24-JAN-11	http://www.modencode.org/White.shtml	2014-10-01	pd
FBgn0261434	FBgn0038206	hkb	twf	PDI: Transcription factor-Gene	-0.3349	-	twf	hkb	21177974	http://www.ncbi.nlm.nih.gov/sites/entrez?cmd=retrieve&db=pubmed&list_uids=21177974&dopt=DocSum	http://www.modencode.org/White.shtml	21177974(MI:0225(ChIP-chip) and ChIP-seq)	null	modENCODE-24-JAN-11	http://www.modencode.org/White.shtml	2014-10-01	pd
FBgn0261434	FBgn0010473	hkb	tutl	PDI: Transcription factor-Gene	0.1523	-	tutl	hkb	21177974	http://www.ncbi.nlm.nih.gov/sites/entrez?cmd=retrieve&db=pubmed&list_uids=21177974&dopt=DocSum	http://www.modencode.org/White.shtml	21177974(MI:0225(ChIP-chip) and ChIP-seq)	null	modENCODE-24-JAN-11	http://www.modencode.org/White.shtml	2014-10-01	pd
FBgn0261434	FBgn0016120	hkb	ATPsynD	PDI: Transcription factor-Gene	-0.2509	-	ATPsynD	hkb	21177974	http://www.ncbi.nlm.nih.gov/sites/entrez?cmd=retrieve&db=pubmed&list_uids=21177974&dopt=DocSum	http://www.modencode.org/White.shtml	21177974(MI:0225(ChIP-chip) and ChIP-seq)	null	modENCODE-24-JAN-11	http://www.modencode.org/White.shtml	2014-10-01	pd
FBgn0261434	FBgn0261380	hkb	mRpL37	PDI: Transcription factor-Gene	0.1584	-	mRpL37	hkb	21177974	http://www.ncbi.nlm.nih.gov/sites/entrez?cmd=retrieve&db=pubmed&list_uids=21177974&dopt=DocSum	http://www.modencode.org/White.shtml	21177974(MI:0225(ChIP-chip) and ChIP-seq)	null	modENCODE-24-JAN-11	http://www.modencode.org/White.shtml	2014-10-01	pd
FBgn0261434	FBgn0052549	hkb	CG32549	PDI: Transcription factor-Gene	-0.3681	-	CG32549	hkb	21177974	http://www.ncbi.nlm.nih.gov/sites/entrez?cmd=retrieve&db=pubmed&list_uids=21177974&dopt=DocSum	http://www.modencode.org/White.shtml	21177974(MI:0225(ChIP-chip) and ChIP-seq)	null	modENCODE-24-JAN-11	http://www.modencode.org/White.shtml	2014-10-01	pd
FBgn0261434	FBgn0039215	hkb	CG6695	PDI: Transcription factor-Gene	0.7689	-	CG6695	hkb	21177974	http://www.ncbi.nlm.nih.gov/sites/entrez?cmd=retrieve&db=pubmed&list_uids=21177974&dopt=DocSum	http://www.modencode.org/White.shtml	21177974(MI:0225(ChIP-chip) and ChIP-seq)	null	modENCODE-24-JAN-11	http://www.modencode.org/White.shtml	2014-10-01	pd
FBgn0261434	FBgn0025864	hkb	Crag	PDI: Transcription factor-Gene	0.1246	-	Crag	hkb	21177974	http://www.ncbi.nlm.nih.gov/sites/entrez?cmd=retrieve&db=pubmed&list_uids=21177974&dopt=DocSum	http://www.modencode.org/White.shtml	21177974(MI:0225(ChIP-chip) and ChIP-seq)	null	modENCODE-24-JAN-11	http://www.modencode.org/White.shtml	2014-10-01	pd
FBgn0261434	FBgn0025865	hkb	Cortactin	PDI: Transcription factor-Gene	0.3004	-	Cortactin	hkb	21177974	http://www.ncbi.nlm.nih.gov/sites/entrez?cmd=retrieve&db=pubmed&list_uids=21177974&dopt=DocSum	http://www.modencode.org/White.shtml	21177974(MI:0225(ChIP-chip) and ChIP-seq)	null	modENCODE-24-JAN-11	http://www.modencode.org/White.shtml	2014-10-01	pd
FBgn0261434	FBgn0040602	hkb	CG14545	PDI: Transcription factor-Gene	-0.0815	-	CG14545	hkb	21177974	http://www.ncbi.nlm.nih.gov/sites/entrez?cmd=retrieve&db=pubmed&list_uids=21177974&dopt=DocSum	http://www.modencode.org/White.shtml	21177974(MI:0225(ChIP-chip) and ChIP-seq)	null	modENCODE-24-JAN-11	http://www.modencode.org/White.shtml	2014-10-01	pd
FBgn0261434	FBgn0039212	hkb	Syx18	PDI: Transcription factor-Gene	0.1867	-	Syx18	hkb	21177974	http://www.ncbi.nlm.nih.gov/sites/entrez?cmd=retrieve&db=pubmed&list_uids=21177974&dopt=DocSum	http://www.modencode.org/White.shtml	21177974(MI:0225(ChIP-chip) and ChIP-seq)	null	modENCODE-24-JAN-11	http://www.modencode.org/White.shtml	2014-10-01	pd
FBgn0261434	FBgn0035113	hkb	pyx	PDI: Transcription factor-Gene	-0.2541	-	pyx	hkb	21177974	http://www.ncbi.nlm.nih.gov/sites/entrez?cmd=retrieve&db=pubmed&list_uids=21177974&dopt=DocSum	http://www.modencode.org/White.shtml	21177974(MI:0225(ChIP-chip) and ChIP-seq)	null	modENCODE-24-JAN-11	http://www.modencode.org/White.shtml	2014-10-01	pd
FBgn0261434	FBgn0039213	hkb	atl	PDI: Transcription factor-Gene	-0.2605	-	atl	hkb	21177974	http://www.ncbi.nlm.nih.gov/sites/entrez?cmd=retrieve&db=pubmed&list_uids=21177974&dopt=DocSum	http://www.modencode.org/White.shtml	21177974(MI:0225(ChIP-chip) and ChIP-seq)	null	modENCODE-24-JAN-11	http://www.modencode.org/White.shtml	2014-10-01	pd
FBgn0261434	FBgn0037350	hkb	CG2911	PDI: Transcription factor-Gene	-0.1487	-	CG2911	hkb	21177974	http://www.ncbi.nlm.nih.gov/sites/entrez?cmd=retrieve&db=pubmed&list_uids=21177974&dopt=DocSum	http://www.modencode.org/White.shtml	21177974(MI:0225(ChIP-chip) and ChIP-seq)	null	modENCODE-24-JAN-11	http://www.modencode.org/White.shtml	2014-10-01	pd
FBgn0261434	FBgn0035741	hkb	BBS1	PDI: Transcription factor-Gene	-0.2818	-	BBS1	hkb	21177974	http://www.ncbi.nlm.nih.gov/sites/entrez?cmd=retrieve&db=pubmed&list_uids=21177974&dopt=DocSum	http://www.modencode.org/White.shtml	21177974(MI:0225(ChIP-chip) and ChIP-seq)	null	modENCODE-24-JAN-11	http://www.modencode.org/White.shtml	2014-10-01	pd
FBgn0261434	FBgn0037351	hkb	RpL13A	PDI: Transcription factor-Gene	-0.0237	-	RpL13A	hkb	21177974	http://www.ncbi.nlm.nih.gov/sites/entrez?cmd=retrieve&db=pubmed&list_uids=21177974&dopt=DocSum	http://www.modencode.org/White.shtml	21177974(MI:0225(ChIP-chip) and ChIP-seq)	null	modENCODE-24-JAN-11	http://www.modencode.org/White.shtml	2014-10-01	pd
FBgn0261434	FBgn0035109	hkb	CG13876	PDI: Transcription factor-Gene	0.3327	-	CG13876	hkb	21177974	http://www.ncbi.nlm.nih.gov/sites/entrez?cmd=retrieve&db=pubmed&list_uids=21177974&dopt=DocSum	http://www.modencode.org/White.shtml	21177974(MI:0225(ChIP-chip) and ChIP-seq)	null	modENCODE-24-JAN-11	http://www.modencode.org/White.shtml	2014-10-01	pd
FBgn0261434	FBgn0264712	hkb	CG1172	PDI: Transcription factor-Gene	-0.0261	-	CG1172	hkb	21177974	http://www.ncbi.nlm.nih.gov/sites/entrez?cmd=retrieve&db=pubmed&list_uids=21177974&dopt=DocSum	http://www.modencode.org/White.shtml	21177974(MI:0225(ChIP-chip) and ChIP-seq)	null	modENCODE-24-JAN-11	http://www.modencode.org/White.shtml	2014-10-01	pd
FBgn0261434	FBgn0034073	hkb	CG8414	PDI: Transcription factor-Gene	0.1962	-	CG8414	hkb	21177974	http://www.ncbi.nlm.nih.gov/sites/entrez?cmd=retrieve&db=pubmed&list_uids=21177974&dopt=DocSum	http://www.modencode.org/White.shtml	21177974(MI:0225(ChIP-chip) and ChIP-seq)	null	modENCODE-24-JAN-11	http://www.modencode.org/White.shtml	2014-10-01	pd
FBgn0261434	FBgn0036911	hkb	Fibp	PDI: Transcription factor-Gene	-0.2033	-	Fibp	hkb	21177974	http://www.ncbi.nlm.nih.gov/sites/entrez?cmd=retrieve&db=pubmed&list_uids=21177974&dopt=DocSum	http://www.modencode.org/White.shtml	21177974(MI:0225(ChIP-chip) and ChIP-seq)	null	modENCODE-24-JAN-11	http://www.modencode.org/White.shtml	2014-10-01	pd
FBgn0261434	FBgn0032014	hkb	CG7840	PDI: Transcription factor-Gene	0.2432	-	CG7840	hkb	21177974	http://www.ncbi.nlm.nih.gov/sites/entrez?cmd=retrieve&db=pubmed&list_uids=21177974&dopt=DocSum	http://www.modencode.org/White.shtml	21177974(MI:0225(ChIP-chip) and ChIP-seq)	null	modENCODE-24-JAN-11	http://www.modencode.org/White.shtml	2014-10-01	pd
FBgn0261434	FBgn0035140	hkb	CG17180	PDI: Transcription factor-Gene	0.09	-	CG17180	hkb	21177974	http://www.ncbi.nlm.nih.gov/sites/entrez?cmd=retrieve&db=pubmed&list_uids=21177974&dopt=DocSum	http://www.modencode.org/White.shtml	21177974(MI:0225(ChIP-chip) and ChIP-seq)	null	modENCODE-24-JAN-11	http://www.modencode.org/White.shtml	2014-10-01	pd
FBgn0261434	FBgn0035337	hkb	CG15877	PDI: Transcription factor-Gene	0.3682	-	CG15877	hkb	21177974	http://www.ncbi.nlm.nih.gov/sites/entrez?cmd=retrieve&db=pubmed&list_uids=21177974&dopt=DocSum	http://www.modencode.org/White.shtml	21177974(MI:0225(ChIP-chip) and ChIP-seq)	null	modENCODE-24-JAN-11	http://www.modencode.org/White.shtml	2014-10-01	pd
FBgn0261434	FBgn0034282	hkb	Mapmodulin	PDI: Transcription factor-Gene	0.6903	-	Mapmodulin	hkb	21177974	http://www.ncbi.nlm.nih.gov/sites/entrez?cmd=retrieve&db=pubmed&list_uids=21177974&dopt=DocSum	http://www.modencode.org/White.shtml	21177974(MI:0225(ChIP-chip) and ChIP-seq)	null	modENCODE-24-JAN-11	http://www.modencode.org/White.shtml	2014-10-01	pd
FBgn0261434	FBgn0026179	hkb	siz	PDI: Transcription factor-Gene	0.5504	-	siz	hkb	21177974	http://www.ncbi.nlm.nih.gov/sites/entrez?cmd=retrieve&db=pubmed&list_uids=21177974&dopt=DocSum	http://www.modencode.org/White.shtml	21177974(MI:0225(ChIP-chip) and ChIP-seq)	null	modENCODE-24-JAN-11	http://www.modencode.org/White.shtml	2014-10-01	pd
FBgn0261434	FBgn0035147	hkb	Gale	PDI: Transcription factor-Gene	-0.2526	-	Gale	hkb	21177974	http://www.ncbi.nlm.nih.gov/sites/entrez?cmd=retrieve&db=pubmed&list_uids=21177974&dopt=DocSum	http://www.modencode.org/White.shtml	21177974(MI:0225(ChIP-chip) and ChIP-seq)	null	modENCODE-24-JAN-11	http://www.modencode.org/White.shtml	2014-10-01	pd
FBgn0261434	FBgn0027660	hkb	blot	PDI: Transcription factor-Gene	0.2477	-	blot	hkb	21177974	http://www.ncbi.nlm.nih.gov/sites/entrez?cmd=retrieve&db=pubmed&list_uids=21177974&dopt=DocSum	http://www.modencode.org/White.shtml	21177974(MI:0225(ChIP-chip) and ChIP-seq)	null	modENCODE-24-JAN-11	http://www.modencode.org/White.shtml	2014-10-01	pd
FBgn0261434	FBgn0039488	hkb	CG6066	PDI: Transcription factor-Gene	0.6384	-	CG6066	hkb	21177974	http://www.ncbi.nlm.nih.gov/sites/entrez?cmd=retrieve&db=pubmed&list_uids=21177974&dopt=DocSum	http://www.modencode.org/White.shtml	21177974(MI:0225(ChIP-chip) and ChIP-seq)	null	modENCODE-24-JAN-11	http://www.modencode.org/White.shtml	2014-10-01	pd
FBgn0261434	FBgn0039489	hkb	CG5880	PDI: Transcription factor-Gene	0.4552	-	CG5880	hkb	21177974	http://www.ncbi.nlm.nih.gov/sites/entrez?cmd=retrieve&db=pubmed&list_uids=21177974&dopt=DocSum	http://www.modencode.org/White.shtml	21177974(MI:0225(ChIP-chip) and ChIP-seq)	null	modENCODE-24-JAN-11	http://www.modencode.org/White.shtml	2014-10-01	pd
FBgn0261434	FBgn0035713	hkb	velo	PDI: Transcription factor-Gene	0.566	-	velo	hkb	21177974	http://www.ncbi.nlm.nih.gov/sites/entrez?cmd=retrieve&db=pubmed&list_uids=21177974&dopt=DocSum	http://www.modencode.org/White.shtml	21177974(MI:0225(ChIP-chip) and ChIP-seq)	null	modENCODE-24-JAN-11	http://www.modencode.org/White.shtml	2014-10-01	pd
FBgn0261434	FBgn0025637	hkb	SkpA	PDI: Transcription factor-Gene	0.5231	-	SkpA	hkb	21177974	http://www.ncbi.nlm.nih.gov/sites/entrez?cmd=retrieve&db=pubmed&list_uids=21177974&dopt=DocSum	http://www.modencode.org/White.shtml	21177974(MI:0225(ChIP-chip) and ChIP-seq)	null	modENCODE-24-JAN-11	http://www.modencode.org/White.shtml	2014-10-01	pd
FBgn0261434	FBgn0021761	hkb	Nup154	PDI: Transcription factor-Gene	0.5653	-	Nup154	hkb	21177974	http://www.ncbi.nlm.nih.gov/sites/entrez?cmd=retrieve&db=pubmed&list_uids=21177974&dopt=DocSum	http://www.modencode.org/White.shtml	21177974(MI:0225(ChIP-chip) and ChIP-seq)	null	modENCODE-24-JAN-11	http://www.modencode.org/White.shtml	2014-10-01	pd
FBgn0261434	FBgn0032955	hkb	CG2201	PDI: Transcription factor-Gene	0.1876	-	CG2201	hkb	21177974	http://www.ncbi.nlm.nih.gov/sites/entrez?cmd=retrieve&db=pubmed&list_uids=21177974&dopt=DocSum	http://www.modencode.org/White.shtml	21177974(MI:0225(ChIP-chip) and ChIP-seq)	null	modENCODE-24-JAN-11	http://www.modencode.org/White.shtml	2014-10-01	pd
FBgn0261434	FBgn0052521	hkb	CG32521	PDI: Transcription factor-Gene	-0.2787	-	CG32521	hkb	21177974	http://www.ncbi.nlm.nih.gov/sites/entrez?cmd=retrieve&db=pubmed&list_uids=21177974&dopt=DocSum	http://www.modencode.org/White.shtml	21177974(MI:0225(ChIP-chip) and ChIP-seq)	null	modENCODE-24-JAN-11	http://www.modencode.org/White.shtml	2014-10-01	pd
FBgn0261434	FBgn0038957	hkb	CG7059	PDI: Transcription factor-Gene	-0.2011	-	CG7059	hkb	21177974	http://www.ncbi.nlm.nih.gov/sites/entrez?cmd=retrieve&db=pubmed&list_uids=21177974&dopt=DocSum	http://www.modencode.org/White.shtml	21177974(MI:0225(ChIP-chip) and ChIP-seq)	null	modENCODE-24-JAN-11	http://www.modencode.org/White.shtml	2014-10-01	pd
FBgn0261434	FBgn0008636	hkb	hbn	PDI: Transcription factor-Gene	0.881	-	hbn	hkb	21177974	http://www.ncbi.nlm.nih.gov/sites/entrez?cmd=retrieve&db=pubmed&list_uids=21177974&dopt=DocSum	http://www.modencode.org/White.shtml	21177974(MI:0225(ChIP-chip) and ChIP-seq)	null	modENCODE-24-JAN-11	http://www.modencode.org/White.shtml	2014-10-01	pd
FBgn0261434	FBgn0008635	hkb	betaCOP	PDI: Transcription factor-Gene	0.0716	-	Œ≤COP	hkb	21177974	http://www.ncbi.nlm.nih.gov/sites/entrez?cmd=retrieve&db=pubmed&list_uids=21177974&dopt=DocSum	http://www.modencode.org/White.shtml	21177974(MI:0225(ChIP-chip) and ChIP-seq)	null	modENCODE-24-JAN-11	http://www.modencode.org/White.shtml	2014-10-01	pd
FBgn0261434	FBgn0025639	hkb	Hmt4-20	PDI: Transcription factor-Gene	0.602	-	Hmt4-20	hkb	21177974	http://www.ncbi.nlm.nih.gov/sites/entrez?cmd=retrieve&db=pubmed&list_uids=21177974&dopt=DocSum	http://www.modencode.org/White.shtml	21177974(MI:0225(ChIP-chip) and ChIP-seq)	null	modENCODE-24-JAN-11	http://www.modencode.org/White.shtml	2014-10-01	pd
FBgn0261434	FBgn0019968	hkb	Khc-73	PDI: Transcription factor-Gene	0.2433	-	Khc-73	hkb	21177974	http://www.ncbi.nlm.nih.gov/sites/entrez?cmd=retrieve&db=pubmed&list_uids=21177974&dopt=DocSum	http://www.modencode.org/White.shtml	21177974(MI:0225(ChIP-chip) and ChIP-seq)	null	modENCODE-24-JAN-11	http://www.modencode.org/White.shtml	2014-10-01	pd
FBgn0261434	FBgn0035137	hkb	CG1233	PDI: Transcription factor-Gene	0.0725	-	CG1233	hkb	21177974	http://www.ncbi.nlm.nih.gov/sites/entrez?cmd=retrieve&db=pubmed&list_uids=21177974&dopt=DocSum	http://www.modencode.org/White.shtml	21177974(MI:0225(ChIP-chip) and ChIP-seq)	null	modENCODE-24-JAN-11	http://www.modencode.org/White.shtml	2014-10-01	pd
FBgn0261434	FBgn0062440	hkb	EMRE	PDI: Transcription factor-Gene	0.4272	-	CG17680	hkb	21177974	http://www.ncbi.nlm.nih.gov/sites/entrez?cmd=retrieve&db=pubmed&list_uids=21177974&dopt=DocSum	http://www.modencode.org/White.shtml	21177974(MI:0225(ChIP-chip) and ChIP-seq)	null	modENCODE-24-JAN-11	http://www.modencode.org/White.shtml	2014-10-01	pd
FBgn0261434	FBgn0035714	hkb	CG8549	PDI: Transcription factor-Gene	-0.3722	-	CG8549	hkb	21177974	http://www.ncbi.nlm.nih.gov/sites/entrez?cmd=retrieve&db=pubmed&list_uids=21177974&dopt=DocSum	http://www.modencode.org/White.shtml	21177974(MI:0225(ChIP-chip) and ChIP-seq)	null	modENCODE-24-JAN-11	http://www.modencode.org/White.shtml	2014-10-01	pd
FBgn0261434	FBgn0004509	hkb	Fur1	PDI: Transcription factor-Gene	0.2865	-	Fur1	hkb	21177974	http://www.ncbi.nlm.nih.gov/sites/entrez?cmd=retrieve&db=pubmed&list_uids=21177974&dopt=DocSum	http://www.modencode.org/White.shtml	21177974(MI:0225(ChIP-chip) and ChIP-seq)	null	modENCODE-24-JAN-11	http://www.modencode.org/White.shtml	2014-10-01	pd
FBgn0261434	FBgn0005596	hkb	yem	PDI: Transcription factor-Gene	0.1012	-	yem	hkb	21177974	http://www.ncbi.nlm.nih.gov/sites/entrez?cmd=retrieve&db=pubmed&list_uids=21177974&dopt=DocSum	http://www.modencode.org/White.shtml	21177974(MI:0225(ChIP-chip) and ChIP-seq)	null	modENCODE-24-JAN-11	http://www.modencode.org/White.shtml	2014-10-01	pd
FBgn0261434	FBgn0034091	hkb	mrj	PDI: Transcription factor-Gene	0.1501	-	mrj	hkb	21177974	http://www.ncbi.nlm.nih.gov/sites/entrez?cmd=retrieve&db=pubmed&list_uids=21177974&dopt=DocSum	http://www.modencode.org/White.shtml	21177974(MI:0225(ChIP-chip) and ChIP-seq)	null	modENCODE-24-JAN-11	http://www.modencode.org/White.shtml	2014-10-01	pd
FBgn0261434	FBgn0024983	hkb	CG4293	PDI: Transcription factor-Gene	0.2987	-	CG4293	hkb	21177974	http://www.ncbi.nlm.nih.gov/sites/entrez?cmd=retrieve&db=pubmed&list_uids=21177974&dopt=DocSum	http://www.modencode.org/White.shtml	21177974(MI:0225(ChIP-chip) and ChIP-seq)	null	modENCODE-24-JAN-11	http://www.modencode.org/White.shtml	2014-10-01	pd
FBgn0261434	FBgn0261108	hkb	Atg13	PDI: Transcription factor-Gene	0.0138	-	Atg13	hkb	21177974	http://www.ncbi.nlm.nih.gov/sites/entrez?cmd=retrieve&db=pubmed&list_uids=21177974&dopt=DocSum	http://www.modencode.org/White.shtml	21177974(MI:0225(ChIP-chip) and ChIP-seq)	null	modENCODE-24-JAN-11	http://www.modencode.org/White.shtml	2014-10-01	pd
FBgn0261434	FBgn0005590	hkb	scw	PDI: Transcription factor-Gene	0.5599	-	scw	hkb	21177974	http://www.ncbi.nlm.nih.gov/sites/entrez?cmd=retrieve&db=pubmed&list_uids=21177974&dopt=DocSum	http://www.modencode.org/White.shtml	21177974(MI:0225(ChIP-chip) and ChIP-seq)	null	modENCODE-24-JAN-11	http://www.modencode.org/White.shtml	2014-10-01	pd
FBgn0261434	FBgn0039474	hkb	CG6283	PDI: Transcription factor-Gene	-0.2105	-	CG6283	hkb	21177974	http://www.ncbi.nlm.nih.gov/sites/entrez?cmd=retrieve&db=pubmed&list_uids=21177974&dopt=DocSum	http://www.modencode.org/White.shtml	21177974(MI:0225(ChIP-chip) and ChIP-seq)	null	modENCODE-24-JAN-11	http://www.modencode.org/White.shtml	2014-10-01	pd
FBgn0261434	FBgn0264326	hkb	DNApol-epsilon255	PDI: Transcription factor-Gene	0.2948	-	DNApol-Œµ255	hkb	21177974	http://www.ncbi.nlm.nih.gov/sites/entrez?cmd=retrieve&db=pubmed&list_uids=21177974&dopt=DocSum	http://www.modencode.org/White.shtml	21177974(MI:0225(ChIP-chip) and ChIP-seq)	null	modENCODE-24-JAN-11	http://www.modencode.org/White.shtml	2014-10-01	pd
FBgn0261434	FBgn0250823	hkb	gish	PDI: Transcription factor-Gene	0.2857	-	gish	hkb	21177974	http://www.ncbi.nlm.nih.gov/sites/entrez?cmd=retrieve&db=pubmed&list_uids=21177974&dopt=DocSum	http://www.modencode.org/White.shtml	21177974(MI:0225(ChIP-chip) and ChIP-seq)	null	modENCODE-24-JAN-11	http://www.modencode.org/White.shtml	2014-10-01	pd
FBgn0261434	FBgn0044871	hkb	Gos28	PDI: Transcription factor-Gene	0.1758	-	Gos28	hkb	21177974	http://www.ncbi.nlm.nih.gov/sites/entrez?cmd=retrieve&db=pubmed&list_uids=21177974&dopt=DocSum	http://www.modencode.org/White.shtml	21177974(MI:0225(ChIP-chip) and ChIP-seq)	null	modENCODE-24-JAN-11	http://www.modencode.org/White.shtml	2014-10-01	pd
FBgn0261434	FBgn0025641	hkb	DAAM	PDI: Transcription factor-Gene	0.2436	-	DAAM	hkb	21177974	http://www.ncbi.nlm.nih.gov/sites/entrez?cmd=retrieve&db=pubmed&list_uids=21177974&dopt=DocSum	http://www.modencode.org/White.shtml	21177974(MI:0225(ChIP-chip) and ChIP-seq)	null	modENCODE-24-JAN-11	http://www.modencode.org/White.shtml	2014-10-01	pd
FBgn0261434	FBgn0261930	hkb	vnd	PDI: Transcription factor-Gene	0.7883	-	vnd	hkb	21177974	http://www.ncbi.nlm.nih.gov/sites/entrez?cmd=retrieve&db=pubmed&list_uids=21177974&dopt=DocSum	http://www.modencode.org/White.shtml	21177974(MI:0225(ChIP-chip) and ChIP-seq)	null	modENCODE-24-JAN-11	http://www.modencode.org/White.shtml	2014-10-01	pd
FBgn0261434	FBgn0047135	hkb	CG32276	PDI: Transcription factor-Gene	-0.1129	-	CG32276	hkb	21177974	http://www.ncbi.nlm.nih.gov/sites/entrez?cmd=retrieve&db=pubmed&list_uids=21177974&dopt=DocSum	http://www.modencode.org/White.shtml	21177974(MI:0225(ChIP-chip) and ChIP-seq)	null	modENCODE-24-JAN-11	http://www.modencode.org/White.shtml	2014-10-01	pd
FBgn0261434	FBgn0015036	hkb	Cyp4ae1	PDI: Transcription factor-Gene	-0.1183	-	Cyp4ae1	hkb	21177974	http://www.ncbi.nlm.nih.gov/sites/entrez?cmd=retrieve&db=pubmed&list_uids=21177974&dopt=DocSum	http://www.modencode.org/White.shtml	21177974(MI:0225(ChIP-chip) and ChIP-seq)	null	modENCODE-24-JAN-11	http://www.modencode.org/White.shtml	2014-10-01	pd
FBgn0261434	FBgn0011300	hkb	babo	PDI: Transcription factor-Gene	-0.0081	-	babo	hkb	21177974	http://www.ncbi.nlm.nih.gov/sites/entrez?cmd=retrieve&db=pubmed&list_uids=21177974&dopt=DocSum	http://www.modencode.org/White.shtml	21177974(MI:0225(ChIP-chip) and ChIP-seq)	null	modENCODE-24-JAN-11	http://www.modencode.org/White.shtml	2014-10-01	pd
FBgn0261434	FBgn0031006	hkb	rictor	PDI: Transcription factor-Gene	0.3541	-	rictor	hkb	21177974	http://www.ncbi.nlm.nih.gov/sites/entrez?cmd=retrieve&db=pubmed&list_uids=21177974&dopt=DocSum	http://www.modencode.org/White.shtml	21177974(MI:0225(ChIP-chip) and ChIP-seq)	null	modENCODE-24-JAN-11	http://www.modencode.org/White.shtml	2014-10-01	pd
FBgn0261434	FBgn0038455	hkb	CG14907	PDI: Transcription factor-Gene	-0.0847	-	CG14907	hkb	21177974	http://www.ncbi.nlm.nih.gov/sites/entrez?cmd=retrieve&db=pubmed&list_uids=21177974&dopt=DocSum	http://www.modencode.org/White.shtml	21177974(MI:0225(ChIP-chip) and ChIP-seq)	null	modENCODE-24-JAN-11	http://www.modencode.org/White.shtml	2014-10-01	pd
FBgn0261434	FBgn0031213	hkb	galectin	PDI: Transcription factor-Gene	-0.3899	-	galectin	hkb	21177974	http://www.ncbi.nlm.nih.gov/sites/entrez?cmd=retrieve&db=pubmed&list_uids=21177974&dopt=DocSum	http://www.modencode.org/White.shtml	21177974(MI:0225(ChIP-chip) and ChIP-seq)	null	modENCODE-24-JAN-11	http://www.modencode.org/White.shtml	2014-10-01	pd
FBgn0261434	FBgn0053094	hkb	Synd	PDI: Transcription factor-Gene	0.0848	-	Synd	hkb	21177974	http://www.ncbi.nlm.nih.gov/sites/entrez?cmd=retrieve&db=pubmed&list_uids=21177974&dopt=DocSum	http://www.modencode.org/White.shtml	21177974(MI:0225(ChIP-chip) and ChIP-seq)	null	modENCODE-24-JAN-11	http://www.modencode.org/White.shtml	2014-10-01	pd
FBgn0261434	FBgn0260011	hkb	NimC4	PDI: Transcription factor-Gene	0.4319	-	NimC4	hkb	21177974	http://www.ncbi.nlm.nih.gov/sites/entrez?cmd=retrieve&db=pubmed&list_uids=21177974&dopt=DocSum	http://www.modencode.org/White.shtml	21177974(MI:0225(ChIP-chip) and ChIP-seq)	null	modENCODE-24-JAN-11	http://www.modencode.org/White.shtml	2014-10-01	pd
FBgn0261434	FBgn0034639	hkb	CG15673	PDI: Transcription factor-Gene	-0.4538	-	CG15673	hkb	21177974	http://www.ncbi.nlm.nih.gov/sites/entrez?cmd=retrieve&db=pubmed&list_uids=21177974&dopt=DocSum	http://www.modencode.org/White.shtml	21177974(MI:0225(ChIP-chip) and ChIP-seq)	null	modENCODE-24-JAN-11	http://www.modencode.org/White.shtml	2014-10-01	pd
FBgn0261434	FBgn0260012	hkb	pds5	PDI: Transcription factor-Gene	0.5014	-	pds5	hkb	21177974	http://www.ncbi.nlm.nih.gov/sites/entrez?cmd=retrieve&db=pubmed&list_uids=21177974&dopt=DocSum	http://www.modencode.org/White.shtml	21177974(MI:0225(ChIP-chip) and ChIP-seq)	null	modENCODE-24-JAN-11	http://www.modencode.org/White.shtml	2014-10-01	pd
FBgn0261434	FBgn0082585	hkb	sprt	PDI: Transcription factor-Gene	0.3196	-	sprt	hkb	21177974	http://www.ncbi.nlm.nih.gov/sites/entrez?cmd=retrieve&db=pubmed&list_uids=21177974&dopt=DocSum	http://www.modencode.org/White.shtml	21177974(MI:0225(ChIP-chip) and ChIP-seq)	null	modENCODE-24-JAN-11	http://www.modencode.org/White.shtml	2014-10-01	pd
FBgn0261434	FBgn0035357	hkb	MEP-1	PDI: Transcription factor-Gene	0.7271	-	MEP-1	hkb	21177974	http://www.ncbi.nlm.nih.gov/sites/entrez?cmd=retrieve&db=pubmed&list_uids=21177974&dopt=DocSum	http://www.modencode.org/White.shtml	21177974(MI:0225(ChIP-chip) and ChIP-seq)	null	modENCODE-24-JAN-11	http://www.modencode.org/White.shtml	2014-10-01	pd
FBgn0261434	FBgn0082582	hkb	tmod	PDI: Transcription factor-Gene	-0.279	-	tmod	hkb	21177974	http://www.ncbi.nlm.nih.gov/sites/entrez?cmd=retrieve&db=pubmed&list_uids=21177974&dopt=DocSum	http://www.modencode.org/White.shtml	21177974(MI:0225(ChIP-chip) and ChIP-seq)	null	modENCODE-24-JAN-11	http://www.modencode.org/White.shtml	2014-10-01	pd
FBgn0261434	FBgn0052380	hkb	SMSr	PDI: Transcription factor-Gene	-0.0884	-	SMSr	hkb	21177974	http://www.ncbi.nlm.nih.gov/sites/entrez?cmd=retrieve&db=pubmed&list_uids=21177974&dopt=DocSum	http://www.modencode.org/White.shtml	21177974(MI:0225(ChIP-chip) and ChIP-seq)	null	modENCODE-24-JAN-11	http://www.modencode.org/White.shtml	2014-10-01	pd
FBgn0261434	FBgn0031224	hkb	CG11454	PDI: Transcription factor-Gene	0.2794	-	CG11454	hkb	21177974	http://www.ncbi.nlm.nih.gov/sites/entrez?cmd=retrieve&db=pubmed&list_uids=21177974&dopt=DocSum	http://www.modencode.org/White.shtml	21177974(MI:0225(ChIP-chip) and ChIP-seq)	null	modENCODE-24-JAN-11	http://www.modencode.org/White.shtml	2014-10-01	pd
FBgn0261434	FBgn0033392	hkb	CG8027	PDI: Transcription factor-Gene	0.5809	-	CG8027	hkb	21177974	http://www.ncbi.nlm.nih.gov/sites/entrez?cmd=retrieve&db=pubmed&list_uids=21177974&dopt=DocSum	http://www.modencode.org/White.shtml	21177974(MI:0225(ChIP-chip) and ChIP-seq)	null	modENCODE-24-JAN-11	http://www.modencode.org/White.shtml	2014-10-01	pd
FBgn0261434	FBgn0031021	hkb	ND-18	PDI: Transcription factor-Gene	-0.2471	-	ND-18	hkb	21177974	http://www.ncbi.nlm.nih.gov/sites/entrez?cmd=retrieve&db=pubmed&list_uids=21177974&dopt=DocSum	http://www.modencode.org/White.shtml	21177974(MI:0225(ChIP-chip) and ChIP-seq)	null	modENCODE-24-JAN-11	http://www.modencode.org/White.shtml	2014-10-01	pd
FBgn0261434	FBgn0034230	hkb	CG4853	PDI: Transcription factor-Gene	0.233	-	CG4853	hkb	21177974	http://www.ncbi.nlm.nih.gov/sites/entrez?cmd=retrieve&db=pubmed&list_uids=21177974&dopt=DocSum	http://www.modencode.org/White.shtml	21177974(MI:0225(ChIP-chip) and ChIP-seq)	null	modENCODE-24-JAN-11	http://www.modencode.org/White.shtml	2014-10-01	pd
FBgn0261434	FBgn0001138	hkb	grn	PDI: Transcription factor-Gene	0.3491	-	grn	hkb	21177974	http://www.ncbi.nlm.nih.gov/sites/entrez?cmd=retrieve&db=pubmed&list_uids=21177974&dopt=DocSum	http://www.modencode.org/White.shtml	21177974(MI:0225(ChIP-chip) and ChIP-seq)	null	modENCODE-24-JAN-11	http://www.modencode.org/White.shtml	2014-10-01	pd
FBgn0261434	FBgn0262391	hkb	mir-184	PDI: Transcription factor-Gene	-	-	mir-184	hkb	21177974	http://www.ncbi.nlm.nih.gov/sites/entrez?cmd=retrieve&db=pubmed&list_uids=21177974&dopt=DocSum	http://www.modencode.org/White.shtml	21177974(MI:0225(ChIP-chip) and ChIP-seq)	null	modENCODE-24-JAN-11	http://www.modencode.org/White.shtml	2014-10-01	pd
FBgn0261434	FBgn0005386	hkb	ash1	PDI: Transcription factor-Gene	0.5091	-	ash1	hkb	21177974	http://www.ncbi.nlm.nih.gov/sites/entrez?cmd=retrieve&db=pubmed&list_uids=21177974&dopt=DocSum	http://www.modencode.org/White.shtml	21177974(MI:0225(ChIP-chip) and ChIP-seq)	null	modENCODE-24-JAN-11	http://www.modencode.org/White.shtml	2014-10-01	pd
FBgn0261434	FBgn0029804	hkb	CG3097	PDI: Transcription factor-Gene	-0.0599	-	CG3097	hkb	21177974	http://www.ncbi.nlm.nih.gov/sites/entrez?cmd=retrieve&db=pubmed&list_uids=21177974&dopt=DocSum	http://www.modencode.org/White.shtml	21177974(MI:0225(ChIP-chip) and ChIP-seq)	null	modENCODE-24-JAN-11	http://www.modencode.org/White.shtml	2014-10-01	pd
FBgn0261434	FBgn0015589	hkb	Apc	PDI: Transcription factor-Gene	0.8496	-	Apc	hkb	21177974	http://www.ncbi.nlm.nih.gov/sites/entrez?cmd=retrieve&db=pubmed&list_uids=21177974&dopt=DocSum	http://www.modencode.org/White.shtml	21177974(MI:0225(ChIP-chip) and ChIP-seq)	null	modENCODE-24-JAN-11	http://www.modencode.org/White.shtml	2014-10-01	pd
FBgn0261434	FBgn0062413	hkb	Ctr1A	PDI: Transcription factor-Gene	-0.2934	-	Ctr1A	hkb	21177974	http://www.ncbi.nlm.nih.gov/sites/entrez?cmd=retrieve&db=pubmed&list_uids=21177974&dopt=DocSum	http://www.modencode.org/White.shtml	21177974(MI:0225(ChIP-chip) and ChIP-seq)	null	modENCODE-24-JAN-11	http://www.modencode.org/White.shtml	2014-10-01	pd
FBgn0261434	FBgn0033117	hkb	CG3358	PDI: Transcription factor-Gene	0.3293	-	CG3358	hkb	21177974	http://www.ncbi.nlm.nih.gov/sites/entrez?cmd=retrieve&db=pubmed&list_uids=21177974&dopt=DocSum	http://www.modencode.org/White.shtml	21177974(MI:0225(ChIP-chip) and ChIP-seq)	null	modENCODE-24-JAN-11	http://www.modencode.org/White.shtml	2014-10-01	pd
FBgn0261434	FBgn0262398	hkb	mir-124	PDI: Transcription factor-Gene	-	-	mir-124	hkb	21177974	http://www.ncbi.nlm.nih.gov/sites/entrez?cmd=retrieve&db=pubmed&list_uids=21177974&dopt=DocSum	http://www.modencode.org/White.shtml	21177974(MI:0225(ChIP-chip) and ChIP-seq)	null	modENCODE-24-JAN-11	http://www.modencode.org/White.shtml	2014-10-01	pd
FBgn0261434	FBgn0028421	hkb	Kap3	PDI: Transcription factor-Gene	-0.0062	-	Kap3	hkb	21177974	http://www.ncbi.nlm.nih.gov/sites/entrez?cmd=retrieve&db=pubmed&list_uids=21177974&dopt=DocSum	http://www.modencode.org/White.shtml	21177974(MI:0225(ChIP-chip) and ChIP-seq)	null	modENCODE-24-JAN-11	http://www.modencode.org/White.shtml	2014-10-01	pd
FBgn0261434	FBgn0259745	hkb	wech	PDI: Transcription factor-Gene	0.8629	-	wech	hkb	21177974	http://www.ncbi.nlm.nih.gov/sites/entrez?cmd=retrieve&db=pubmed&list_uids=21177974&dopt=DocSum	http://www.modencode.org/White.shtml	21177974(MI:0225(ChIP-chip) and ChIP-seq)	null	modENCODE-24-JAN-11	http://www.modencode.org/White.shtml	2014-10-01	pd
FBgn0261434	FBgn0261955	hkb	kdn	PDI: Transcription factor-Gene	-0.2028	-	kdn	hkb	21177974	http://www.ncbi.nlm.nih.gov/sites/entrez?cmd=retrieve&db=pubmed&list_uids=21177974&dopt=DocSum	http://www.modencode.org/White.shtml	21177974(MI:0225(ChIP-chip) and ChIP-seq)	null	modENCODE-24-JAN-11	http://www.modencode.org/White.shtml	2014-10-01	pd
FBgn0261434	FBgn0024542	hkb	Neos	PDI: Transcription factor-Gene	0.5156	-	Neos	hkb	21177974	http://www.ncbi.nlm.nih.gov/sites/entrez?cmd=retrieve&db=pubmed&list_uids=21177974&dopt=DocSum	http://www.modencode.org/White.shtml	21177974(MI:0225(ChIP-chip) and ChIP-seq)	null	modENCODE-24-JAN-11	http://www.modencode.org/White.shtml	2014-10-01	pd
FBgn0261434	FBgn0028953	hkb	CG14478	PDI: Transcription factor-Gene	0.7844	-	CG14478	hkb	21177974	http://www.ncbi.nlm.nih.gov/sites/entrez?cmd=retrieve&db=pubmed&list_uids=21177974&dopt=DocSum	http://www.modencode.org/White.shtml	21177974(MI:0225(ChIP-chip) and ChIP-seq)	null	modENCODE-24-JAN-11	http://www.modencode.org/White.shtml	2014-10-01	pd
FBgn0261434	FBgn0261953	hkb	TfAP-2	PDI: Transcription factor-Gene	0.9222	-	TfAP-2	hkb	21177974	http://www.ncbi.nlm.nih.gov/sites/entrez?cmd=retrieve&db=pubmed&list_uids=21177974&dopt=DocSum	http://www.modencode.org/White.shtml	21177974(MI:0225(ChIP-chip) and ChIP-seq)	null	modENCODE-24-JAN-11	http://www.modencode.org/White.shtml	2014-10-01	pd
FBgn0261434	FBgn0265297	hkb	pAbp	PDI: Transcription factor-Gene	0.1254	-	pAbp	hkb	21177974	http://www.ncbi.nlm.nih.gov/sites/entrez?cmd=retrieve&db=pubmed&list_uids=21177974&dopt=DocSum	http://www.modencode.org/White.shtml	21177974(MI:0225(ChIP-chip) and ChIP-seq)	null	modENCODE-24-JAN-11	http://www.modencode.org/White.shtml	2014-10-01	pd
FBgn0261434	FBgn0052756	hkb	CG32756	PDI: Transcription factor-Gene	0.4656	-	CG32756	hkb	21177974	http://www.ncbi.nlm.nih.gov/sites/entrez?cmd=retrieve&db=pubmed&list_uids=21177974&dopt=DocSum	http://www.modencode.org/White.shtml	21177974(MI:0225(ChIP-chip) and ChIP-seq)	null	modENCODE-24-JAN-11	http://www.modencode.org/White.shtml	2014-10-01	pd
FBgn0261434	FBgn0003396	hkb	shn	PDI: Transcription factor-Gene	0.3421	-	shn	hkb	21177974	http://www.ncbi.nlm.nih.gov/sites/entrez?cmd=retrieve&db=pubmed&list_uids=21177974&dopt=DocSum	http://www.modencode.org/White.shtml	21177974(MI:0225(ChIP-chip) and ChIP-seq)	null	modENCODE-24-JAN-11	http://www.modencode.org/White.shtml	2014-10-01	pd
FBgn0261434	FBgn0035370	hkb	Non2	PDI: Transcription factor-Gene	0.7797	-	Non2	hkb	21177974	http://www.ncbi.nlm.nih.gov/sites/entrez?cmd=retrieve&db=pubmed&list_uids=21177974&dopt=DocSum	http://www.modencode.org/White.shtml	21177974(MI:0225(ChIP-chip) and ChIP-seq)	null	modENCODE-24-JAN-11	http://www.modencode.org/White.shtml	2014-10-01	pd
FBgn0261434	FBgn0038981	hkb	CG5346	PDI: Transcription factor-Gene	-0.2313	-	CG5346	hkb	21177974	http://www.ncbi.nlm.nih.gov/sites/entrez?cmd=retrieve&db=pubmed&list_uids=21177974&dopt=DocSum	http://www.modencode.org/White.shtml	21177974(MI:0225(ChIP-chip) and ChIP-seq)	null	modENCODE-24-JAN-11	http://www.modencode.org/White.shtml	2014-10-01	pd
FBgn0261434	FBgn0003392	hkb	shi	PDI: Transcription factor-Gene	-0.3125	-	shi	hkb	21177974	http://www.ncbi.nlm.nih.gov/sites/entrez?cmd=retrieve&db=pubmed&list_uids=21177974&dopt=DocSum	http://www.modencode.org/White.shtml	21177974(MI:0225(ChIP-chip) and ChIP-seq)	null	modENCODE-24-JAN-11	http://www.modencode.org/White.shtml	2014-10-01	pd
FBgn0261434	FBgn0034245	hkb	UQCR-6.4	PDI: Transcription factor-Gene	-0.3072	-	UQCR-6.4	hkb	21177974	http://www.ncbi.nlm.nih.gov/sites/entrez?cmd=retrieve&db=pubmed&list_uids=21177974&dopt=DocSum	http://www.modencode.org/White.shtml	21177974(MI:0225(ChIP-chip) and ChIP-seq)	null	modENCODE-24-JAN-11	http://www.modencode.org/White.shtml	2014-10-01	pd
FBgn0261434	FBgn0052368	hkb	CG32368	PDI: Transcription factor-Gene	-0.2504	-	CG32368	hkb	21177974	http://www.ncbi.nlm.nih.gov/sites/entrez?cmd=retrieve&db=pubmed&list_uids=21177974&dopt=DocSum	http://www.modencode.org/White.shtml	21177974(MI:0225(ChIP-chip) and ChIP-seq)	null	modENCODE-24-JAN-11	http://www.modencode.org/White.shtml	2014-10-01	pd
FBgn0261434	FBgn0034248	hkb	CG14483	PDI: Transcription factor-Gene	-0.3094	-	CG14483	hkb	21177974	http://www.ncbi.nlm.nih.gov/sites/entrez?cmd=retrieve&db=pubmed&list_uids=21177974&dopt=DocSum	http://www.modencode.org/White.shtml	21177974(MI:0225(ChIP-chip) and ChIP-seq)	null	modENCODE-24-JAN-11	http://www.modencode.org/White.shtml	2014-10-01	pd
FBgn0261434	FBgn0033100	hkb	CG3420	PDI: Transcription factor-Gene	0.1211	-	CG3420	hkb	21177974	http://www.ncbi.nlm.nih.gov/sites/entrez?cmd=retrieve&db=pubmed&list_uids=21177974&dopt=DocSum	http://www.modencode.org/White.shtml	21177974(MI:0225(ChIP-chip) and ChIP-seq)	null	modENCODE-24-JAN-11	http://www.modencode.org/White.shtml	2014-10-01	pd
FBgn0261434	FBgn0034249	hkb	RhoGAP54D	PDI: Transcription factor-Gene	0.6164	-	RhoGAP54D	hkb	21177974	http://www.ncbi.nlm.nih.gov/sites/entrez?cmd=retrieve&db=pubmed&list_uids=21177974&dopt=DocSum	http://www.modencode.org/White.shtml	21177974(MI:0225(ChIP-chip) and ChIP-seq)	null	modENCODE-24-JAN-11	http://www.modencode.org/White.shtml	2014-10-01	pd
FBgn0261434	FBgn0259732	hkb	tal-3A	PDI: Transcription factor-Gene	-	-	tal-3A	hkb	21177974	http://www.ncbi.nlm.nih.gov/sites/entrez?cmd=retrieve&db=pubmed&list_uids=21177974&dopt=DocSum	http://www.modencode.org/White.shtml	21177974(MI:0225(ChIP-chip) and ChIP-seq)	null	modENCODE-24-JAN-11	http://www.modencode.org/White.shtml	2014-10-01	pd
FBgn0261434	FBgn0259733	hkb	tal-AA	PDI: Transcription factor-Gene	-0.0633	-	tal-AA	hkb	21177974	http://www.ncbi.nlm.nih.gov/sites/entrez?cmd=retrieve&db=pubmed&list_uids=21177974&dopt=DocSum	http://www.modencode.org/White.shtml	21177974(MI:0225(ChIP-chip) and ChIP-seq)	null	modENCODE-24-JAN-11	http://www.modencode.org/White.shtml	2014-10-01	pd
FBgn0261434	FBgn0259734	hkb	Nost	PDI: Transcription factor-Gene	-0.1385	-	Nost	hkb	21177974	http://www.ncbi.nlm.nih.gov/sites/entrez?cmd=retrieve&db=pubmed&list_uids=21177974&dopt=DocSum	http://www.modencode.org/White.shtml	21177974(MI:0225(ChIP-chip) and ChIP-seq)	null	modENCODE-24-JAN-11	http://www.modencode.org/White.shtml	2014-10-01	pd
FBgn0261434	FBgn0029819	hkb	Usp30	PDI: Transcription factor-Gene	-0.0142	-	Usp30	hkb	21177974	http://www.ncbi.nlm.nih.gov/sites/entrez?cmd=retrieve&db=pubmed&list_uids=21177974&dopt=DocSum	http://www.modencode.org/White.shtml	21177974(MI:0225(ChIP-chip) and ChIP-seq)	null	modENCODE-24-JAN-11	http://www.modencode.org/White.shtml	2014-10-01	pd
FBgn0261434	FBgn0259735	hkb	CG42389	PDI: Transcription factor-Gene	-0.0802	-	CG42389	hkb	21177974	http://www.ncbi.nlm.nih.gov/sites/entrez?cmd=retrieve&db=pubmed&list_uids=21177974&dopt=DocSum	http://www.modencode.org/White.shtml	21177974(MI:0225(ChIP-chip) and ChIP-seq)	null	modENCODE-24-JAN-11	http://www.modencode.org/White.shtml	2014-10-01	pd
FBgn0261434	FBgn0024555	hkb	flfl	PDI: Transcription factor-Gene	0.8386	-	flfl	hkb	21177974	http://www.ncbi.nlm.nih.gov/sites/entrez?cmd=retrieve&db=pubmed&list_uids=21177974&dopt=DocSum	http://www.modencode.org/White.shtml	21177974(MI:0225(ChIP-chip) and ChIP-seq)	null	modENCODE-24-JAN-11	http://www.modencode.org/White.shtml	2014-10-01	pd
FBgn0261434	FBgn0034631	hkb	TAF1C-like	PDI: Transcription factor-Gene	0.579	-	TAF1C-like	hkb	21177974	http://www.ncbi.nlm.nih.gov/sites/entrez?cmd=retrieve&db=pubmed&list_uids=21177974&dopt=DocSum	http://www.modencode.org/White.shtml	21177974(MI:0225(ChIP-chip) and ChIP-seq)	null	modENCODE-24-JAN-11	http://www.modencode.org/White.shtml	2014-10-01	pd
FBgn0261434	FBgn0259730	hkb	tal-1A	PDI: Transcription factor-Gene	0.1118	-	tal-1A	hkb	21177974	http://www.ncbi.nlm.nih.gov/sites/entrez?cmd=retrieve&db=pubmed&list_uids=21177974&dopt=DocSum	http://www.modencode.org/White.shtml	21177974(MI:0225(ChIP-chip) and ChIP-seq)	null	modENCODE-24-JAN-11	http://www.modencode.org/White.shtml	2014-10-01	pd
FBgn0261434	FBgn0002638	hkb	Rcc1	PDI: Transcription factor-Gene	0.6917	-	Rcc1	hkb	21177974	http://www.ncbi.nlm.nih.gov/sites/entrez?cmd=retrieve&db=pubmed&list_uids=21177974&dopt=DocSum	http://www.modencode.org/White.shtml	21177974(MI:0225(ChIP-chip) and ChIP-seq)	null	modENCODE-24-JAN-11	http://www.modencode.org/White.shtml	2014-10-01	pd
FBgn0261434	FBgn0259731	hkb	tal-2A	PDI: Transcription factor-Gene	-	-	tal-2A	hkb	21177974	http://www.ncbi.nlm.nih.gov/sites/entrez?cmd=retrieve&db=pubmed&list_uids=21177974&dopt=DocSum	http://www.modencode.org/White.shtml	21177974(MI:0225(ChIP-chip) and ChIP-seq)	null	modENCODE-24-JAN-11	http://www.modencode.org/White.shtml	2014-10-01	pd
FBgn0261434	FBgn0052772	hkb	CG32772	PDI: Transcription factor-Gene	0.0379	-	CG32772	hkb	21177974	http://www.ncbi.nlm.nih.gov/sites/entrez?cmd=retrieve&db=pubmed&list_uids=21177974&dopt=DocSum	http://www.modencode.org/White.shtml	21177974(MI:0225(ChIP-chip) and ChIP-seq)	null	modENCODE-24-JAN-11	http://www.modencode.org/White.shtml	2014-10-01	pd
FBgn0261434	FBgn0029820	hkb	CG16721	PDI: Transcription factor-Gene	-0.2843	-	CG16721	hkb	21177974	http://www.ncbi.nlm.nih.gov/sites/entrez?cmd=retrieve&db=pubmed&list_uids=21177974&dopt=DocSum	http://www.modencode.org/White.shtml	21177974(MI:0225(ChIP-chip) and ChIP-seq)	null	modENCODE-24-JAN-11	http://www.modencode.org/White.shtml	2014-10-01	pd
FBgn0261434	FBgn0051632	hkb	sens-2	PDI: Transcription factor-Gene	0.0043	-	sens-2	hkb	21177974	http://www.ncbi.nlm.nih.gov/sites/entrez?cmd=retrieve&db=pubmed&list_uids=21177974&dopt=DocSum	http://www.modencode.org/White.shtml	21177974(MI:0225(ChIP-chip) and ChIP-seq)	null	modENCODE-24-JAN-11	http://www.modencode.org/White.shtml	2014-10-01	pd
FBgn0261434	FBgn0015569	hkb	alpha-Est10	PDI: Transcription factor-Gene	-0.3845	-	Œ±-Est10	hkb	21177974	http://www.ncbi.nlm.nih.gov/sites/entrez?cmd=retrieve&db=pubmed&list_uids=21177974&dopt=DocSum	http://www.modencode.org/White.shtml	21177974(MI:0225(ChIP-chip) and ChIP-seq)	null	modENCODE-24-JAN-11	http://www.modencode.org/White.shtml	2014-10-01	pd
FBgn0261434	FBgn0014184	hkb	Oda	PDI: Transcription factor-Gene	-0.0432	-	Oda	hkb	21177974	http://www.ncbi.nlm.nih.gov/sites/entrez?cmd=retrieve&db=pubmed&list_uids=21177974&dopt=DocSum	http://www.modencode.org/White.shtml	21177974(MI:0225(ChIP-chip) and ChIP-seq)	null	modENCODE-24-JAN-11	http://www.modencode.org/White.shtml	2014-10-01	pd
FBgn0261434	FBgn0259932	hkb	CG42455	PDI: Transcription factor-Gene	-0.1344	-	CG42455	hkb	21177974	http://www.ncbi.nlm.nih.gov/sites/entrez?cmd=retrieve&db=pubmed&list_uids=21177974&dopt=DocSum	http://www.modencode.org/White.shtml	21177974(MI:0225(ChIP-chip) and ChIP-seq)	null	modENCODE-24-JAN-11	http://www.modencode.org/White.shtml	2014-10-01	pd
FBgn0261434	FBgn0044823	hkb	Spec2	PDI: Transcription factor-Gene	0.0884	-	Spec2	hkb	21177974	http://www.ncbi.nlm.nih.gov/sites/entrez?cmd=retrieve&db=pubmed&list_uids=21177974&dopt=DocSum	http://www.modencode.org/White.shtml	21177974(MI:0225(ChIP-chip) and ChIP-seq)	null	modENCODE-24-JAN-11	http://www.modencode.org/White.shtml	2014-10-01	pd
FBgn0261434	FBgn0028746	hkb	CG18508	PDI: Transcription factor-Gene	-0.2249	-	CG18508	hkb	21177974	http://www.ncbi.nlm.nih.gov/sites/entrez?cmd=retrieve&db=pubmed&list_uids=21177974&dopt=DocSum	http://www.modencode.org/White.shtml	21177974(MI:0225(ChIP-chip) and ChIP-seq)	null	modENCODE-24-JAN-11	http://www.modencode.org/White.shtml	2014-10-01	pd
FBgn0261434	FBgn0259937	hkb	Nop60B	PDI: Transcription factor-Gene	0.3078	-	Nop60B	hkb	21177974	http://www.ncbi.nlm.nih.gov/sites/entrez?cmd=retrieve&db=pubmed&list_uids=21177974&dopt=DocSum	http://www.modencode.org/White.shtml	21177974(MI:0225(ChIP-chip) and ChIP-seq)	null	modENCODE-24-JAN-11	http://www.modencode.org/White.shtml	2014-10-01	pd
FBgn0261434	FBgn0029825	hkb	CG12728	PDI: Transcription factor-Gene	0.5811	-	CG12728	hkb	21177974	http://www.ncbi.nlm.nih.gov/sites/entrez?cmd=retrieve&db=pubmed&list_uids=21177974&dopt=DocSum	http://www.modencode.org/White.shtml	21177974(MI:0225(ChIP-chip) and ChIP-seq)	null	modENCODE-24-JAN-11	http://www.modencode.org/White.shtml	2014-10-01	pd
FBgn0261434	FBgn0002626	hkb	RpL32	PDI: Transcription factor-Gene	0.1045	-	RpL32	hkb	21177974	http://www.ncbi.nlm.nih.gov/sites/entrez?cmd=retrieve&db=pubmed&list_uids=21177974&dopt=DocSum	http://www.modencode.org/White.shtml	21177974(MI:0225(ChIP-chip) and ChIP-seq)	null	modENCODE-24-JAN-11	http://www.modencode.org/White.shtml	2014-10-01	pd
FBgn0261434	FBgn0267912	hkb	CanA-14F	PDI: Transcription factor-Gene	-0.191	-	CanA-14F	hkb	21177974	http://www.ncbi.nlm.nih.gov/sites/entrez?cmd=retrieve&db=pubmed&list_uids=21177974&dopt=DocSum	http://www.modencode.org/White.shtml	21177974(MI:0225(ChIP-chip) and ChIP-seq)	null	modENCODE-24-JAN-11	http://www.modencode.org/White.shtml	2014-10-01	pd
FBgn0261434	FBgn0020255	hkb	Ran	PDI: Transcription factor-Gene	0.6733	-	Ran	hkb	21177974	http://www.ncbi.nlm.nih.gov/sites/entrez?cmd=retrieve&db=pubmed&list_uids=21177974&dopt=DocSum	http://www.modencode.org/White.shtml	21177974(MI:0225(ChIP-chip) and ChIP-seq)	null	modENCODE-24-JAN-11	http://www.modencode.org/White.shtml	2014-10-01	pd
FBgn0261434	FBgn0020257	hkb	Ppa	PDI: Transcription factor-Gene	0.6685	-	Ppa	hkb	21177974	http://www.ncbi.nlm.nih.gov/sites/entrez?cmd=retrieve&db=pubmed&list_uids=21177974&dopt=DocSum	http://www.modencode.org/White.shtml	21177974(MI:0225(ChIP-chip) and ChIP-seq)	null	modENCODE-24-JAN-11	http://www.modencode.org/White.shtml	2014-10-01	pd
FBgn0261434	FBgn0032780	hkb	CG13085	PDI: Transcription factor-Gene	-0.3939	-	CG13085	hkb	21177974	http://www.ncbi.nlm.nih.gov/sites/entrez?cmd=retrieve&db=pubmed&list_uids=21177974&dopt=DocSum	http://www.modencode.org/White.shtml	21177974(MI:0225(ChIP-chip) and ChIP-seq)	null	modENCODE-24-JAN-11	http://www.modencode.org/White.shtml	2014-10-01	pd
FBgn0261434	FBgn0262872	hkb	milt	PDI: Transcription factor-Gene	0.0381	-	milt	hkb	21177974	http://www.ncbi.nlm.nih.gov/sites/entrez?cmd=retrieve&db=pubmed&list_uids=21177974&dopt=DocSum	http://www.modencode.org/White.shtml	21177974(MI:0225(ChIP-chip) and ChIP-seq)	null	modENCODE-24-JAN-11	http://www.modencode.org/White.shtml	2014-10-01	pd
FBgn0261434	FBgn0039696	hkb	Rnb	PDI: Transcription factor-Gene	0.467	-	CG7837	hkb	21177974	http://www.ncbi.nlm.nih.gov/sites/entrez?cmd=retrieve&db=pubmed&list_uids=21177974&dopt=DocSum	http://www.modencode.org/White.shtml	21177974(MI:0225(ChIP-chip) and ChIP-seq)	null	modENCODE-24-JAN-11	http://www.modencode.org/White.shtml	2014-10-01	pd
FBgn0261434	FBgn0259722	hkb	CG42376	PDI: Transcription factor-Gene	-0.5858	-	CG42376	hkb	21177974	http://www.ncbi.nlm.nih.gov/sites/entrez?cmd=retrieve&db=pubmed&list_uids=21177974&dopt=DocSum	http://www.modencode.org/White.shtml	21177974(MI:0225(ChIP-chip) and ChIP-seq)	null	modENCODE-24-JAN-11	http://www.modencode.org/White.shtml	2014-10-01	pd
FBgn0261434	FBgn0262139	hkb	trh	PDI: Transcription factor-Gene	-0.1825	-	trh	hkb	21177974	http://www.ncbi.nlm.nih.gov/sites/entrez?cmd=retrieve&db=pubmed&list_uids=21177974&dopt=DocSum	http://www.modencode.org/White.shtml	21177974(MI:0225(ChIP-chip) and ChIP-seq)	null	modENCODE-24-JAN-11	http://www.modencode.org/White.shtml	2014-10-01	pd
FBgn0261434	FBgn0051606	hkb	CG31606	PDI: Transcription factor-Gene	-0.1459	-	CG31606	hkb	21177974	http://www.ncbi.nlm.nih.gov/sites/entrez?cmd=retrieve&db=pubmed&list_uids=21177974&dopt=DocSum	http://www.modencode.org/White.shtml	21177974(MI:0225(ChIP-chip) and ChIP-seq)	null	modENCODE-24-JAN-11	http://www.modencode.org/White.shtml	2014-10-01	pd
FBgn0261434	FBgn0028471	hkb	Nab2	PDI: Transcription factor-Gene	0.7097	-	Nab2	hkb	21177974	http://www.ncbi.nlm.nih.gov/sites/entrez?cmd=retrieve&db=pubmed&list_uids=21177974&dopt=DocSum	http://www.modencode.org/White.shtml	21177974(MI:0225(ChIP-chip) and ChIP-seq)	null	modENCODE-24-JAN-11	http://www.modencode.org/White.shtml	2014-10-01	pd
FBgn0261434	FBgn0032779	hkb	CG16771	PDI: Transcription factor-Gene	-0.4606	-	CG16771	hkb	21177974	http://www.ncbi.nlm.nih.gov/sites/entrez?cmd=retrieve&db=pubmed&list_uids=21177974&dopt=DocSum	http://www.modencode.org/White.shtml	21177974(MI:0225(ChIP-chip) and ChIP-seq)	null	modENCODE-24-JAN-11	http://www.modencode.org/White.shtml	2014-10-01	pd
FBgn0261434	FBgn0001180	hkb	hb	PDI: Transcription factor-Gene	0.4511	-	hb	hkb	21177974	http://www.ncbi.nlm.nih.gov/sites/entrez?cmd=retrieve&db=pubmed&list_uids=21177974&dopt=DocSum	http://www.modencode.org/White.shtml	21177974(MI:0225(ChIP-chip) and ChIP-seq)	null	modENCODE-24-JAN-11	http://www.modencode.org/White.shtml	2014-10-01	pd
FBgn0261434	FBgn0262867	hkb	Ptr	PDI: Transcription factor-Gene	0.6916	-	Ptr	hkb	21177974	http://www.ncbi.nlm.nih.gov/sites/entrez?cmd=retrieve&db=pubmed&list_uids=21177974&dopt=DocSum	http://www.modencode.org/White.shtml	21177974(MI:0225(ChIP-chip) and ChIP-seq)	null	modENCODE-24-JAN-11	http://www.modencode.org/White.shtml	2014-10-01	pd
FBgn0261434	FBgn0020249	hkb	stck	PDI: Transcription factor-Gene	-0.301	-	stck	hkb	21177974	http://www.ncbi.nlm.nih.gov/sites/entrez?cmd=retrieve&db=pubmed&list_uids=21177974&dopt=DocSum	http://www.modencode.org/White.shtml	21177974(MI:0225(ChIP-chip) and ChIP-seq)	null	modENCODE-24-JAN-11	http://www.modencode.org/White.shtml	2014-10-01	pd
FBgn0261434	FBgn0028737	hkb	eEF1beta	PDI: Transcription factor-Gene	0.1727	-	Ef1Œ≤	hkb	21177974	http://www.ncbi.nlm.nih.gov/sites/entrez?cmd=retrieve&db=pubmed&list_uids=21177974&dopt=DocSum	http://www.modencode.org/White.shtml	21177974(MI:0225(ChIP-chip) and ChIP-seq)	null	modENCODE-24-JAN-11	http://www.modencode.org/White.shtml	2014-10-01	pd
FBgn0261434	FBgn0027603	hkb	Ulp1	PDI: Transcription factor-Gene	0.7415	-	Ulp1	hkb	21177974	http://www.ncbi.nlm.nih.gov/sites/entrez?cmd=retrieve&db=pubmed&list_uids=21177974&dopt=DocSum	http://www.modencode.org/White.shtml	21177974(MI:0225(ChIP-chip) and ChIP-seq)	null	modENCODE-24-JAN-11	http://www.modencode.org/White.shtml	2014-10-01	pd
FBgn0261434	FBgn0051849	hkb	CG31849	PDI: Transcription factor-Gene	0.5779	-	CG31849	hkb	21177974	http://www.ncbi.nlm.nih.gov/sites/entrez?cmd=retrieve&db=pubmed&list_uids=21177974&dopt=DocSum	http://www.modencode.org/White.shtml	21177974(MI:0225(ChIP-chip) and ChIP-seq)	null	modENCODE-24-JAN-11	http://www.modencode.org/White.shtml	2014-10-01	pd
FBgn0261434	FBgn0000721	hkb	for	PDI: Transcription factor-Gene	0.024	-	for	hkb	21177974	http://www.ncbi.nlm.nih.gov/sites/entrez?cmd=retrieve&db=pubmed&list_uids=21177974&dopt=DocSum	http://www.modencode.org/White.shtml	21177974(MI:0225(ChIP-chip) and ChIP-seq)	null	modENCODE-24-JAN-11	http://www.modencode.org/White.shtml	2014-10-01	pd
FBgn0261434	FBgn0002023	hkb	Lim3	PDI: Transcription factor-Gene	0.1847	-	Lim3	hkb	21177974	http://www.ncbi.nlm.nih.gov/sites/entrez?cmd=retrieve&db=pubmed&list_uids=21177974&dopt=DocSum	http://www.modencode.org/White.shtml	21177974(MI:0225(ChIP-chip) and ChIP-seq)	null	modENCODE-24-JAN-11	http://www.modencode.org/White.shtml	2014-10-01	pd
FBgn0261434	FBgn0035390	hkb	scramb2	PDI: Transcription factor-Gene	0.1157	-	scramb2	hkb	21177974	http://www.ncbi.nlm.nih.gov/sites/entrez?cmd=retrieve&db=pubmed&list_uids=21177974&dopt=DocSum	http://www.modencode.org/White.shtml	21177974(MI:0225(ChIP-chip) and ChIP-seq)	null	modENCODE-24-JAN-11	http://www.modencode.org/White.shtml	2014-10-01	pd
FBgn0261434	FBgn0038400	hkb	CG5903	PDI: Transcription factor-Gene	-0.3694	-	CG5903	hkb	21177974	http://www.ncbi.nlm.nih.gov/sites/entrez?cmd=retrieve&db=pubmed&list_uids=21177974&dopt=DocSum	http://www.modencode.org/White.shtml	21177974(MI:0225(ChIP-chip) and ChIP-seq)	null	modENCODE-24-JAN-11	http://www.modencode.org/White.shtml	2014-10-01	pd
FBgn0261434	FBgn0031265	hkb	CG2794	PDI: Transcription factor-Gene	-0.1495	-	CG2794	hkb	21177974	http://www.ncbi.nlm.nih.gov/sites/entrez?cmd=retrieve&db=pubmed&list_uids=21177974&dopt=DocSum	http://www.modencode.org/White.shtml	21177974(MI:0225(ChIP-chip) and ChIP-seq)	null	modENCODE-24-JAN-11	http://www.modencode.org/White.shtml	2014-10-01	pd
FBgn0261434	FBgn0034800	hkb	CG3788	PDI: Transcription factor-Gene	-0.1494	-	CG3788	hkb	21177974	http://www.ncbi.nlm.nih.gov/sites/entrez?cmd=retrieve&db=pubmed&list_uids=21177974&dopt=DocSum	http://www.modencode.org/White.shtml	21177974(MI:0225(ChIP-chip) and ChIP-seq)	null	modENCODE-24-JAN-11	http://www.modencode.org/White.shtml	2014-10-01	pd
FBgn0261434	FBgn0033357	hkb	Tom7	PDI: Transcription factor-Gene	-0.0139	-	Tom7	hkb	21177974	http://www.ncbi.nlm.nih.gov/sites/entrez?cmd=retrieve&db=pubmed&list_uids=21177974&dopt=DocSum	http://www.modencode.org/White.shtml	21177974(MI:0225(ChIP-chip) and ChIP-seq)	null	modENCODE-24-JAN-11	http://www.modencode.org/White.shtml	2014-10-01	pd
FBgn0261434	FBgn0038401	hkb	CG5916	PDI: Transcription factor-Gene	0.0865	-	CG5916	hkb	21177974	http://www.ncbi.nlm.nih.gov/sites/entrez?cmd=retrieve&db=pubmed&list_uids=21177974&dopt=DocSum	http://www.modencode.org/White.shtml	21177974(MI:0225(ChIP-chip) and ChIP-seq)	null	modENCODE-24-JAN-11	http://www.modencode.org/White.shtml	2014-10-01	pd
FBgn0261434	FBgn0001174	hkb	halo	PDI: Transcription factor-Gene	0.6407	-	halo	hkb	21177974	http://www.ncbi.nlm.nih.gov/sites/entrez?cmd=retrieve&db=pubmed&list_uids=21177974&dopt=DocSum	http://www.modencode.org/White.shtml	21177974(MI:0225(ChIP-chip) and ChIP-seq)	null	modENCODE-24-JAN-11	http://www.modencode.org/White.shtml	2014-10-01	pd
FBgn0261434	FBgn0029843	hkb	Nep1	PDI: Transcription factor-Gene	-0.2342	-	Nep1	hkb	21177974	http://www.ncbi.nlm.nih.gov/sites/entrez?cmd=retrieve&db=pubmed&list_uids=21177974&dopt=DocSum	http://www.modencode.org/White.shtml	21177974(MI:0225(ChIP-chip) and ChIP-seq)	null	modENCODE-24-JAN-11	http://www.modencode.org/White.shtml	2014-10-01	pd
FBgn0261434	FBgn0033159	hkb	Dscam1	PDI: Transcription factor-Gene	0.5909	-	Dscam1	hkb	21177974	http://www.ncbi.nlm.nih.gov/sites/entrez?cmd=retrieve&db=pubmed&list_uids=21177974&dopt=DocSum	http://www.modencode.org/White.shtml	21177974(MI:0225(ChIP-chip) and ChIP-seq)	null	modENCODE-24-JAN-11	http://www.modencode.org/White.shtml	2014-10-01	pd
FBgn0261434	FBgn0267488	hkb	Mcr	PDI: Transcription factor-Gene	0.1955	-	Mcr	hkb	21177974	http://www.ncbi.nlm.nih.gov/sites/entrez?cmd=retrieve&db=pubmed&list_uids=21177974&dopt=DocSum	http://www.modencode.org/White.shtml	21177974(MI:0225(ChIP-chip) and ChIP-seq)	null	modENCODE-24-JAN-11	http://www.modencode.org/White.shtml	2014-10-01	pd
FBgn0261434	FBgn0014163	hkb	fax	PDI: Transcription factor-Gene	0.6068	-	fax	hkb	21177974	http://www.ncbi.nlm.nih.gov/sites/entrez?cmd=retrieve&db=pubmed&list_uids=21177974&dopt=DocSum	http://www.modencode.org/White.shtml	21177974(MI:0225(ChIP-chip) and ChIP-seq)	null	modENCODE-24-JAN-11	http://www.modencode.org/White.shtml	2014-10-01	pd
FBgn0261434	FBgn0003204	hkb	ras	PDI: Transcription factor-Gene	-0.0436	-	ras	hkb	21177974	http://www.ncbi.nlm.nih.gov/sites/entrez?cmd=retrieve&db=pubmed&list_uids=21177974&dopt=DocSum	http://www.modencode.org/White.shtml	21177974(MI:0225(ChIP-chip) and ChIP-seq)	null	modENCODE-24-JAN-11	http://www.modencode.org/White.shtml	2014-10-01	pd
FBgn0261434	FBgn0024330	hkb	MED6	PDI: Transcription factor-Gene	0.784	-	MED6	hkb	21177974	http://www.ncbi.nlm.nih.gov/sites/entrez?cmd=retrieve&db=pubmed&list_uids=21177974&dopt=DocSum	http://www.modencode.org/White.shtml	21177974(MI:0225(ChIP-chip) and ChIP-seq)	null	modENCODE-24-JAN-11	http://www.modencode.org/White.shtml	2014-10-01	pd
FBgn0261434	FBgn0002413	hkb	dco	PDI: Transcription factor-Gene	0.2509	-	dco	hkb	21177974	http://www.ncbi.nlm.nih.gov/sites/entrez?cmd=retrieve&db=pubmed&list_uids=21177974&dopt=DocSum	http://www.modencode.org/White.shtml	21177974(MI:0225(ChIP-chip) and ChIP-seq)	null	modENCODE-24-JAN-11	http://www.modencode.org/White.shtml	2014-10-01	pd
FBgn0261434	FBgn0032489	hkb	CG15480	PDI: Transcription factor-Gene	0.942	-	CG15480	hkb	21177974	http://www.ncbi.nlm.nih.gov/sites/entrez?cmd=retrieve&db=pubmed&list_uids=21177974&dopt=DocSum	http://www.modencode.org/White.shtml	21177974(MI:0225(ChIP-chip) and ChIP-seq)	null	modENCODE-24-JAN-11	http://www.modencode.org/White.shtml	2014-10-01	pd
FBgn0261434	FBgn0015019	hkb	CCT3	PDI: Transcription factor-Gene	-0.058	-	CctŒ≥	hkb	21177974	http://www.ncbi.nlm.nih.gov/sites/entrez?cmd=retrieve&db=pubmed&list_uids=21177974&dopt=DocSum	http://www.modencode.org/White.shtml	21177974(MI:0225(ChIP-chip) and ChIP-seq)	null	modENCODE-24-JAN-11	http://www.modencode.org/White.shtml	2014-10-01	pd
FBgn0261434	FBgn0039283	hkb	danr	PDI: Transcription factor-Gene	0.8921	-	danr	hkb	21177974	http://www.ncbi.nlm.nih.gov/sites/entrez?cmd=retrieve&db=pubmed&list_uids=21177974&dopt=DocSum	http://www.modencode.org/White.shtml	21177974(MI:0225(ChIP-chip) and ChIP-seq)	null	modENCODE-24-JAN-11	http://www.modencode.org/White.shtml	2014-10-01	pd
FBgn0261434	FBgn0032486	hkb	mRF1	PDI: Transcription factor-Gene	0.3224	-	CG5705	hkb	21177974	http://www.ncbi.nlm.nih.gov/sites/entrez?cmd=retrieve&db=pubmed&list_uids=21177974&dopt=DocSum	http://www.modencode.org/White.shtml	21177974(MI:0225(ChIP-chip) and ChIP-seq)	null	modENCODE-24-JAN-11	http://www.modencode.org/White.shtml	2014-10-01	pd
FBgn0261434	FBgn0032485	hkb	CG9426	PDI: Transcription factor-Gene	0.0858	-	CG9426	hkb	21177974	http://www.ncbi.nlm.nih.gov/sites/entrez?cmd=retrieve&db=pubmed&list_uids=21177974&dopt=DocSum	http://www.modencode.org/White.shtml	21177974(MI:0225(ChIP-chip) and ChIP-seq)	null	modENCODE-24-JAN-11	http://www.modencode.org/White.shtml	2014-10-01	pd
FBgn0261434	FBgn0028991	hkb	seq	PDI: Transcription factor-Gene	0.7388	-	seq	hkb	21177974	http://www.ncbi.nlm.nih.gov/sites/entrez?cmd=retrieve&db=pubmed&list_uids=21177974&dopt=DocSum	http://www.modencode.org/White.shtml	21177974(MI:0225(ChIP-chip) and ChIP-seq)	null	modENCODE-24-JAN-11	http://www.modencode.org/White.shtml	2014-10-01	pd
FBgn0261434	FBgn0259700	hkb	CG42354	PDI: Transcription factor-Gene	-0.0669	-	CG42354	hkb	21177974	http://www.ncbi.nlm.nih.gov/sites/entrez?cmd=retrieve&db=pubmed&list_uids=21177974&dopt=DocSum	http://www.modencode.org/White.shtml	21177974(MI:0225(ChIP-chip) and ChIP-seq)	null	modENCODE-24-JAN-11	http://www.modencode.org/White.shtml	2014-10-01	pd
FBgn0261434	FBgn0015509	hkb	Cul1	PDI: Transcription factor-Gene	0.4829	-	Cul1	hkb	21177974	http://www.ncbi.nlm.nih.gov/sites/entrez?cmd=retrieve&db=pubmed&list_uids=21177974&dopt=DocSum	http://www.modencode.org/White.shtml	21177974(MI:0225(ChIP-chip) and ChIP-seq)	null	modENCODE-24-JAN-11	http://www.modencode.org/White.shtml	2014-10-01	pd
FBgn0261434	FBgn0259705	hkb	CG42359	PDI: Transcription factor-Gene	0.0389	-	CG42359	hkb	21177974	http://www.ncbi.nlm.nih.gov/sites/entrez?cmd=retrieve&db=pubmed&list_uids=21177974&dopt=DocSum	http://www.modencode.org/White.shtml	21177974(MI:0225(ChIP-chip) and ChIP-seq)	null	modENCODE-24-JAN-11	http://www.modencode.org/White.shtml	2014-10-01	pd
FBgn0261434	FBgn0259704	hkb	Nsun5	PDI: Transcription factor-Gene	0.7144	-	Nsun5	hkb	21177974	http://www.ncbi.nlm.nih.gov/sites/entrez?cmd=retrieve&db=pubmed&list_uids=21177974&dopt=DocSum	http://www.modencode.org/White.shtml	21177974(MI:0225(ChIP-chip) and ChIP-seq)	null	modENCODE-24-JAN-11	http://www.modencode.org/White.shtml	2014-10-01	pd
FBgn0261434	FBgn0020235	hkb	ATPsyngamma	PDI: Transcription factor-Gene	-0.4161	-	ATPsynŒ≥	hkb	21177974	http://www.ncbi.nlm.nih.gov/sites/entrez?cmd=retrieve&db=pubmed&list_uids=21177974&dopt=DocSum	http://www.modencode.org/White.shtml	21177974(MI:0225(ChIP-chip) and ChIP-seq)	null	modENCODE-24-JAN-11	http://www.modencode.org/White.shtml	2014-10-01	pd
FBgn0261434	FBgn0041706	hkb	CG3253	PDI: Transcription factor-Gene	0.8727	-	CG3253	hkb	21177974	http://www.ncbi.nlm.nih.gov/sites/entrez?cmd=retrieve&db=pubmed&list_uids=21177974&dopt=DocSum	http://www.modencode.org/White.shtml	21177974(MI:0225(ChIP-chip) and ChIP-seq)	null	modENCODE-24-JAN-11	http://www.modencode.org/White.shtml	2014-10-01	pd
FBgn0261434	FBgn0038678	hkb	mRpL55	PDI: Transcription factor-Gene	0.205	-	mRpL55	hkb	21177974	http://www.ncbi.nlm.nih.gov/sites/entrez?cmd=retrieve&db=pubmed&list_uids=21177974&dopt=DocSum	http://www.modencode.org/White.shtml	21177974(MI:0225(ChIP-chip) and ChIP-seq)	null	modENCODE-24-JAN-11	http://www.modencode.org/White.shtml	2014-10-01	pd
FBgn0261434	FBgn0259985	hkb	Mppe	PDI: Transcription factor-Gene	0.2792	-	Mppe	hkb	21177974	http://www.ncbi.nlm.nih.gov/sites/entrez?cmd=retrieve&db=pubmed&list_uids=21177974&dopt=DocSum	http://www.modencode.org/White.shtml	21177974(MI:0225(ChIP-chip) and ChIP-seq)	null	modENCODE-24-JAN-11	http://www.modencode.org/White.shtml	2014-10-01	pd
FBgn0261434	FBgn0028717	hkb	Lnk	PDI: Transcription factor-Gene	0.5957	-	Lnk	hkb	21177974	http://www.ncbi.nlm.nih.gov/sites/entrez?cmd=retrieve&db=pubmed&list_uids=21177974&dopt=DocSum	http://www.modencode.org/White.shtml	21177974(MI:0225(ChIP-chip) and ChIP-seq)	null	modENCODE-24-JAN-11	http://www.modencode.org/White.shtml	2014-10-01	pd
FBgn0261434	FBgn0261710	hkb	nocte	PDI: Transcription factor-Gene	0.5463	-	nocte	hkb	21177974	http://www.ncbi.nlm.nih.gov/sites/entrez?cmd=retrieve&db=pubmed&list_uids=21177974&dopt=DocSum	http://www.modencode.org/White.shtml	21177974(MI:0225(ChIP-chip) and ChIP-seq)	null	modENCODE-24-JAN-11	http://www.modencode.org/White.shtml	2014-10-01	pd
FBgn0261434	FBgn0015513	hkb	mbc	PDI: Transcription factor-Gene	0.4208	-	mbc	hkb	21177974	http://www.ncbi.nlm.nih.gov/sites/entrez?cmd=retrieve&db=pubmed&list_uids=21177974&dopt=DocSum	http://www.modencode.org/White.shtml	21177974(MI:0225(ChIP-chip) and ChIP-seq)	null	modENCODE-24-JAN-11	http://www.modencode.org/White.shtml	2014-10-01	pd
FBgn0261434	FBgn0028494	hkb	CG6424	PDI: Transcription factor-Gene	-0.1328	-	CG6424	hkb	21177974	http://www.ncbi.nlm.nih.gov/sites/entrez?cmd=retrieve&db=pubmed&list_uids=21177974&dopt=DocSum	http://www.modencode.org/White.shtml	21177974(MI:0225(ChIP-chip) and ChIP-seq)	null	modENCODE-24-JAN-11	http://www.modencode.org/White.shtml	2014-10-01	pd
FBgn0261434	FBgn0029859	hkb	CG15892	PDI: Transcription factor-Gene	-	-	CG15892	hkb	21177974	http://www.ncbi.nlm.nih.gov/sites/entrez?cmd=retrieve&db=pubmed&list_uids=21177974&dopt=DocSum	http://www.modencode.org/White.shtml	21177974(MI:0225(ChIP-chip) and ChIP-seq)	null	modENCODE-24-JAN-11	http://www.modencode.org/White.shtml	2014-10-01	pd
FBgn0261434	FBgn0029996	hkb	UbcE2H	PDI: Transcription factor-Gene	0.0977	-	UbcE2H	hkb	21177974	http://www.ncbi.nlm.nih.gov/sites/entrez?cmd=retrieve&db=pubmed&list_uids=21177974&dopt=DocSum	http://www.modencode.org/White.shtml	21177974(MI:0225(ChIP-chip) and ChIP-seq)	null	modENCODE-24-JAN-11	http://www.modencode.org/White.shtml	2014-10-01	pd
FBgn0261434	FBgn0039288	hkb	CG13653	PDI: Transcription factor-Gene	0.8753	-	CG13653	hkb	21177974	http://www.ncbi.nlm.nih.gov/sites/entrez?cmd=retrieve&db=pubmed&list_uids=21177974&dopt=DocSum	http://www.modencode.org/White.shtml	21177974(MI:0225(ChIP-chip) and ChIP-seq)	null	modENCODE-24-JAN-11	http://www.modencode.org/White.shtml	2014-10-01	pd
FBgn0261434	FBgn0015919	hkb	caup	PDI: Transcription factor-Gene	0.4219	-	caup	hkb	21177974	http://www.ncbi.nlm.nih.gov/sites/entrez?cmd=retrieve&db=pubmed&list_uids=21177974&dopt=DocSum	http://www.modencode.org/White.shtml	21177974(MI:0225(ChIP-chip) and ChIP-seq)	null	modENCODE-24-JAN-11	http://www.modencode.org/White.shtml	2014-10-01	pd
FBgn0261434	FBgn0015721	hkb	ktub	PDI: Transcription factor-Gene	0.7859	-	ktub	hkb	21177974	http://www.ncbi.nlm.nih.gov/sites/entrez?cmd=retrieve&db=pubmed&list_uids=21177974&dopt=DocSum	http://www.modencode.org/White.shtml	21177974(MI:0225(ChIP-chip) and ChIP-seq)	null	modENCODE-24-JAN-11	http://www.modencode.org/White.shtml	2014-10-01	pd
FBgn0261434	FBgn0029851	hkb	CG14445	PDI: Transcription factor-Gene	-0.1399	-	CG14445	hkb	21177974	http://www.ncbi.nlm.nih.gov/sites/entrez?cmd=retrieve&db=pubmed&list_uids=21177974&dopt=DocSum	http://www.modencode.org/White.shtml	21177974(MI:0225(ChIP-chip) and ChIP-seq)	null	modENCODE-24-JAN-11	http://www.modencode.org/White.shtml	2014-10-01	pd
FBgn0261434	FBgn0039286	hkb	dan	PDI: Transcription factor-Gene	0.9179	-	dan	hkb	21177974	http://www.ncbi.nlm.nih.gov/sites/entrez?cmd=retrieve&db=pubmed&list_uids=21177974&dopt=DocSum	http://www.modencode.org/White.shtml	21177974(MI:0225(ChIP-chip) and ChIP-seq)	null	modENCODE-24-JAN-11	http://www.modencode.org/White.shtml	2014-10-01	pd
FBgn0261434	FBgn0028982	hkb	Spt6	PDI: Transcription factor-Gene	0.7119	-	Spt6	hkb	21177974	http://www.ncbi.nlm.nih.gov/sites/entrez?cmd=retrieve&db=pubmed&list_uids=21177974&dopt=DocSum	http://www.modencode.org/White.shtml	21177974(MI:0225(ChIP-chip) and ChIP-seq)	null	modENCODE-24-JAN-11	http://www.modencode.org/White.shtml	2014-10-01	pd
FBgn0261434	FBgn0032490	hkb	CG16813	PDI: Transcription factor-Gene	0.9644	-	CG16813	hkb	21177974	http://www.ncbi.nlm.nih.gov/sites/entrez?cmd=retrieve&db=pubmed&list_uids=21177974&dopt=DocSum	http://www.modencode.org/White.shtml	21177974(MI:0225(ChIP-chip) and ChIP-seq)	null	modENCODE-24-JAN-11	http://www.modencode.org/White.shtml	2014-10-01	pd
FBgn0261434	FBgn0015024	hkb	CkIalpha	PDI: Transcription factor-Gene	0.5922	-	CkIŒ±	hkb	21177974	http://www.ncbi.nlm.nih.gov/sites/entrez?cmd=retrieve&db=pubmed&list_uids=21177974&dopt=DocSum	http://www.modencode.org/White.shtml	21177974(MI:0225(ChIP-chip) and ChIP-seq)	null	modENCODE-24-JAN-11	http://www.modencode.org/White.shtml	2014-10-01	pd
FBgn0261434	FBgn0024510	hkb	dlt	PDI: Transcription factor-Gene	0.342	-	dlt	hkb	21177974	http://www.ncbi.nlm.nih.gov/sites/entrez?cmd=retrieve&db=pubmed&list_uids=21177974&dopt=DocSum	http://www.modencode.org/White.shtml	21177974(MI:0225(ChIP-chip) and ChIP-seq)	null	modENCODE-24-JAN-11	http://www.modencode.org/White.shtml	2014-10-01	pd
FBgn0261434	FBgn0039680	hkb	Cap-D2	PDI: Transcription factor-Gene	0.7875	-	Cap-D2	hkb	21177974	http://www.ncbi.nlm.nih.gov/sites/entrez?cmd=retrieve&db=pubmed&list_uids=21177974&dopt=DocSum	http://www.modencode.org/White.shtml	21177974(MI:0225(ChIP-chip) and ChIP-seq)	null	modENCODE-24-JAN-11	http://www.modencode.org/White.shtml	2014-10-01	pd
FBgn0261434	FBgn0029868	hkb	ND-B16.6	PDI: Transcription factor-Gene	-0.2594	-	ND-B16.6	hkb	21177974	http://www.ncbi.nlm.nih.gov/sites/entrez?cmd=retrieve&db=pubmed&list_uids=21177974&dopt=DocSum	http://www.modencode.org/White.shtml	21177974(MI:0225(ChIP-chip) and ChIP-seq)	null	modENCODE-24-JAN-11	http://www.modencode.org/White.shtml	2014-10-01	pd
FBgn0261434	FBgn0032294	hkb	Vha16-5	PDI: Transcription factor-Gene	-0.1714	-	Vha16-5	hkb	21177974	http://www.ncbi.nlm.nih.gov/sites/entrez?cmd=retrieve&db=pubmed&list_uids=21177974&dopt=DocSum	http://www.modencode.org/White.shtml	21177974(MI:0225(ChIP-chip) and ChIP-seq)	null	modENCODE-24-JAN-11	http://www.modencode.org/White.shtml	2014-10-01	pd
FBgn0261434	FBgn0034210	hkb	CG6568	PDI: Transcription factor-Gene	0.2677	-	CG6568	hkb	21177974	http://www.ncbi.nlm.nih.gov/sites/entrez?cmd=retrieve&db=pubmed&list_uids=21177974&dopt=DocSum	http://www.modencode.org/White.shtml	21177974(MI:0225(ChIP-chip) and ChIP-seq)	null	modENCODE-24-JAN-11	http://www.modencode.org/White.shtml	2014-10-01	pd
FBgn0261434	FBgn0015527	hkb	peng	PDI: Transcription factor-Gene	0.2779	-	peng	hkb	21177974	http://www.ncbi.nlm.nih.gov/sites/entrez?cmd=retrieve&db=pubmed&list_uids=21177974&dopt=DocSum	http://www.modencode.org/White.shtml	21177974(MI:0225(ChIP-chip) and ChIP-seq)	null	modENCODE-24-JAN-11	http://www.modencode.org/White.shtml	2014-10-01	pd
FBgn0261434	FBgn0032295	hkb	CG12299	PDI: Transcription factor-Gene	0.7839	-	CG12299	hkb	21177974	http://www.ncbi.nlm.nih.gov/sites/entrez?cmd=retrieve&db=pubmed&list_uids=21177974&dopt=DocSum	http://www.modencode.org/White.shtml	21177974(MI:0225(ChIP-chip) and ChIP-seq)	null	modENCODE-24-JAN-11	http://www.modencode.org/White.shtml	2014-10-01	pd
FBgn0261434	FBgn0014141	hkb	cher	PDI: Transcription factor-Gene	-0.2701	-	cher	hkb	21177974	http://www.ncbi.nlm.nih.gov/sites/entrez?cmd=retrieve&db=pubmed&list_uids=21177974&dopt=DocSum	http://www.modencode.org/White.shtml	21177974(MI:0225(ChIP-chip) and ChIP-seq)	null	modENCODE-24-JAN-11	http://www.modencode.org/White.shtml	2014-10-01	pd
FBgn0261434	FBgn0041224	hkb	Gr97a	PDI: Transcription factor-Gene	-0.1637	-	Gr97a	hkb	21177974	http://www.ncbi.nlm.nih.gov/sites/entrez?cmd=retrieve&db=pubmed&list_uids=21177974&dopt=DocSum	http://www.modencode.org/White.shtml	21177974(MI:0225(ChIP-chip) and ChIP-seq)	null	modENCODE-24-JAN-11	http://www.modencode.org/White.shtml	2014-10-01	pd
FBgn0261434	FBgn0014143	hkb	croc	PDI: Transcription factor-Gene	0.4972	-	croc	hkb	21177974	http://www.ncbi.nlm.nih.gov/sites/entrez?cmd=retrieve&db=pubmed&list_uids=21177974&dopt=DocSum	http://www.modencode.org/White.shtml	21177974(MI:0225(ChIP-chip) and ChIP-seq)	null	modENCODE-24-JAN-11	http://www.modencode.org/White.shtml	2014-10-01	pd
FBgn0261434	FBgn0001150	hkb	gt	PDI: Transcription factor-Gene	0.7416	-	gt	hkb	21177974	http://www.ncbi.nlm.nih.gov/sites/entrez?cmd=retrieve&db=pubmed&list_uids=21177974&dopt=DocSum	http://www.modencode.org/White.shtml	21177974(MI:0225(ChIP-chip) and ChIP-seq)	null	modENCODE-24-JAN-11	http://www.modencode.org/White.shtml	2014-10-01	pd
FBgn0261434	FBgn0027868	hkb	Nup107	PDI: Transcription factor-Gene	0.678	-	Nup107	hkb	21177974	http://www.ncbi.nlm.nih.gov/sites/entrez?cmd=retrieve&db=pubmed&list_uids=21177974&dopt=DocSum	http://www.modencode.org/White.shtml	21177974(MI:0225(ChIP-chip) and ChIP-seq)	null	modENCODE-24-JAN-11	http://www.modencode.org/White.shtml	2014-10-01	pd
FBgn0261434	FBgn0029860	hkb	CG15891	PDI: Transcription factor-Gene	-0.2483	-	CG15891	hkb	21177974	http://www.ncbi.nlm.nih.gov/sites/entrez?cmd=retrieve&db=pubmed&list_uids=21177974&dopt=DocSum	http://www.modencode.org/White.shtml	21177974(MI:0225(ChIP-chip) and ChIP-seq)	null	modENCODE-24-JAN-11	http://www.modencode.org/White.shtml	2014-10-01	pd
FBgn0261434	FBgn0259143	hkb	CG42258	PDI: Transcription factor-Gene	-0.2925	-	CG42258	hkb	21177974	http://www.ncbi.nlm.nih.gov/sites/entrez?cmd=retrieve&db=pubmed&list_uids=21177974&dopt=DocSum	http://www.modencode.org/White.shtml	21177974(MI:0225(ChIP-chip) and ChIP-seq)	null	modENCODE-24-JAN-11	http://www.modencode.org/White.shtml	2014-10-01	pd
FBgn0261434	FBgn0027864	hkb	Ogg1	PDI: Transcription factor-Gene	0.3161	-	Ogg1	hkb	21177974	http://www.ncbi.nlm.nih.gov/sites/entrez?cmd=retrieve&db=pubmed&list_uids=21177974&dopt=DocSum	http://www.modencode.org/White.shtml	21177974(MI:0225(ChIP-chip) and ChIP-seq)	null	modENCODE-24-JAN-11	http://www.modencode.org/White.shtml	2014-10-01	pd
FBgn0261434	FBgn0029861	hkb	CG3815	PDI: Transcription factor-Gene	0.3632	-	CG3815	hkb	21177974	http://www.ncbi.nlm.nih.gov/sites/entrez?cmd=retrieve&db=pubmed&list_uids=21177974&dopt=DocSum	http://www.modencode.org/White.shtml	21177974(MI:0225(ChIP-chip) and ChIP-seq)	null	modENCODE-24-JAN-11	http://www.modencode.org/White.shtml	2014-10-01	pd
FBgn0261434	FBgn0015905	hkb	ast	PDI: Transcription factor-Gene	0.0948	-	ast	hkb	21177974	http://www.ncbi.nlm.nih.gov/sites/entrez?cmd=retrieve&db=pubmed&list_uids=21177974&dopt=DocSum	http://www.modencode.org/White.shtml	21177974(MI:0225(ChIP-chip) and ChIP-seq)	null	modENCODE-24-JAN-11	http://www.modencode.org/White.shtml	2014-10-01	pd
FBgn0261434	FBgn0036545	hkb	GXIVsPLA2	PDI: Transcription factor-Gene	0.1414	-	GXIVsPLA2	hkb	21177974	http://www.ncbi.nlm.nih.gov/sites/entrez?cmd=retrieve&db=pubmed&list_uids=21177974&dopt=DocSum	http://www.modencode.org/White.shtml	21177974(MI:0225(ChIP-chip) and ChIP-seq)	null	modENCODE-24-JAN-11	http://www.modencode.org/White.shtml	2014-10-01	pd
FBgn0261434	FBgn0037679	hkb	Aduk	PDI: Transcription factor-Gene	0.387	-	CG8866	hkb	21177974	http://www.ncbi.nlm.nih.gov/sites/entrez?cmd=retrieve&db=pubmed&list_uids=21177974&dopt=DocSum	http://www.modencode.org/White.shtml	21177974(MI:0225(ChIP-chip) and ChIP-seq)	null	modENCODE-24-JAN-11	http://www.modencode.org/White.shtml	2014-10-01	pd
FBgn0261434	FBgn0261608	hkb	RpL37A	PDI: Transcription factor-Gene	0.1579	-	RpL37A	hkb	21177974	http://www.ncbi.nlm.nih.gov/sites/entrez?cmd=retrieve&db=pubmed&list_uids=21177974&dopt=DocSum	http://www.modencode.org/White.shtml	21177974(MI:0225(ChIP-chip) and ChIP-seq)	null	modENCODE-24-JAN-11	http://www.modencode.org/White.shtml	2014-10-01	pd
FBgn0261434	FBgn0030479	hkb	Rbp1-like	PDI: Transcription factor-Gene	0.6489	-	Rbp1-like	hkb	21177974	http://www.ncbi.nlm.nih.gov/sites/entrez?cmd=retrieve&db=pubmed&list_uids=21177974&dopt=DocSum	http://www.modencode.org/White.shtml	21177974(MI:0225(ChIP-chip) and ChIP-seq)	null	modENCODE-24-JAN-11	http://www.modencode.org/White.shtml	2014-10-01	pd
FBgn0261434	FBgn0260764	hkb	CG42562	PDI: Transcription factor-Gene	-	-	CG42562	hkb	21177974	http://www.ncbi.nlm.nih.gov/sites/entrez?cmd=retrieve&db=pubmed&list_uids=21177974&dopt=DocSum	http://www.modencode.org/White.shtml	21177974(MI:0225(ChIP-chip) and ChIP-seq)	null	modENCODE-24-JAN-11	http://www.modencode.org/White.shtml	2014-10-01	pd
FBgn0261434	FBgn0260763	hkb	CG42561	PDI: Transcription factor-Gene	-	-	CG42561	hkb	21177974	http://www.ncbi.nlm.nih.gov/sites/entrez?cmd=retrieve&db=pubmed&list_uids=21177974&dopt=DocSum	http://www.modencode.org/White.shtml	21177974(MI:0225(ChIP-chip) and ChIP-seq)	null	modENCODE-24-JAN-11	http://www.modencode.org/White.shtml	2014-10-01	pd
FBgn0261434	FBgn0004956	hkb	upd1	PDI: Transcription factor-Gene	0.9044	-	upd1	hkb	21177974	http://www.ncbi.nlm.nih.gov/sites/entrez?cmd=retrieve&db=pubmed&list_uids=21177974&dopt=DocSum	http://www.modencode.org/White.shtml	21177974(MI:0225(ChIP-chip) and ChIP-seq)	null	modENCODE-24-JAN-11	http://www.modencode.org/White.shtml	2014-10-01	pd
FBgn0261434	FBgn0262109	hkb	lncRNA:CR42862	PDI: Transcription factor-Gene	-0.2976	-	CR42862	hkb	21177974	http://www.ncbi.nlm.nih.gov/sites/entrez?cmd=retrieve&db=pubmed&list_uids=21177974&dopt=DocSum	http://www.modencode.org/White.shtml	21177974(MI:0225(ChIP-chip) and ChIP-seq)	null	modENCODE-24-JAN-11	http://www.modencode.org/White.shtml	2014-10-01	pd
FBgn0261434	FBgn0011573	hkb	Cdc37	PDI: Transcription factor-Gene	0.2793	-	Cdc37	hkb	21177974	http://www.ncbi.nlm.nih.gov/sites/entrez?cmd=retrieve&db=pubmed&list_uids=21177974&dopt=DocSum	http://www.modencode.org/White.shtml	21177974(MI:0225(ChIP-chip) and ChIP-seq)	null	modENCODE-24-JAN-11	http://www.modencode.org/White.shtml	2014-10-01	pd
FBgn0261434	FBgn0029157	hkb	ssh	PDI: Transcription factor-Gene	-0.0054	-	ssh	hkb	21177974	http://www.ncbi.nlm.nih.gov/sites/entrez?cmd=retrieve&db=pubmed&list_uids=21177974&dopt=DocSum	http://www.modencode.org/White.shtml	21177974(MI:0225(ChIP-chip) and ChIP-seq)	null	modENCODE-24-JAN-11	http://www.modencode.org/White.shtml	2014-10-01	pd
FBgn0261434	FBgn0031345	hkb	CG18132	PDI: Transcription factor-Gene	-0.1925	-	CG18132	hkb	21177974	http://www.ncbi.nlm.nih.gov/sites/entrez?cmd=retrieve&db=pubmed&list_uids=21177974&dopt=DocSum	http://www.modencode.org/White.shtml	21177974(MI:0225(ChIP-chip) and ChIP-seq)	null	modENCODE-24-JAN-11	http://www.modencode.org/White.shtml	2014-10-01	pd
FBgn0261434	FBgn0033313	hkb	Cirl	PDI: Transcription factor-Gene	0.462	-	Cirl	hkb	21177974	http://www.ncbi.nlm.nih.gov/sites/entrez?cmd=retrieve&db=pubmed&list_uids=21177974&dopt=DocSum	http://www.modencode.org/White.shtml	21177974(MI:0225(ChIP-chip) and ChIP-seq)	null	modENCODE-24-JAN-11	http://www.modencode.org/White.shtml	2014-10-01	pd
FBgn0261434	FBgn0262112	hkb	sro	PDI: Transcription factor-Gene	-0.1135	-	sro	hkb	21177974	http://www.ncbi.nlm.nih.gov/sites/entrez?cmd=retrieve&db=pubmed&list_uids=21177974&dopt=DocSum	http://www.modencode.org/White.shtml	21177974(MI:0225(ChIP-chip) and ChIP-seq)	null	modENCODE-24-JAN-11	http://www.modencode.org/White.shtml	2014-10-01	pd
FBgn0261434	FBgn0030480	hkb	Tim9a	PDI: Transcription factor-Gene	0.4431	-	Tim9a	hkb	21177974	http://www.ncbi.nlm.nih.gov/sites/entrez?cmd=retrieve&db=pubmed&list_uids=21177974&dopt=DocSum	http://www.modencode.org/White.shtml	21177974(MI:0225(ChIP-chip) and ChIP-seq)	null	modENCODE-24-JAN-11	http://www.modencode.org/White.shtml	2014-10-01	pd
FBgn0261434	FBgn0262114	hkb	RanBPM	PDI: Transcription factor-Gene	0.3236	-	RanBPM	hkb	21177974	http://www.ncbi.nlm.nih.gov/sites/entrez?cmd=retrieve&db=pubmed&list_uids=21177974&dopt=DocSum	http://www.modencode.org/White.shtml	21177974(MI:0225(ChIP-chip) and ChIP-seq)	null	modENCODE-24-JAN-11	http://www.modencode.org/White.shtml	2014-10-01	pd
FBgn0261434	FBgn0031344	hkb	CG7420	PDI: Transcription factor-Gene	0.2151	-	CG7420	hkb	21177974	http://www.ncbi.nlm.nih.gov/sites/entrez?cmd=retrieve&db=pubmed&list_uids=21177974&dopt=DocSum	http://www.modencode.org/White.shtml	21177974(MI:0225(ChIP-chip) and ChIP-seq)	null	modENCODE-24-JAN-11	http://www.modencode.org/White.shtml	2014-10-01	pd
FBgn0261434	FBgn0032478	hkb	CG5458	PDI: Transcription factor-Gene	-0.1828	-	CG5458	hkb	21177974	http://www.ncbi.nlm.nih.gov/sites/entrez?cmd=retrieve&db=pubmed&list_uids=21177974&dopt=DocSum	http://www.modencode.org/White.shtml	21177974(MI:0225(ChIP-chip) and ChIP-seq)	null	modENCODE-24-JAN-11	http://www.modencode.org/White.shtml	2014-10-01	pd
FBgn0261434	FBgn0033717	hkb	CG8839	PDI: Transcription factor-Gene	-0.3252	-	CG8839	hkb	21177974	http://www.ncbi.nlm.nih.gov/sites/entrez?cmd=retrieve&db=pubmed&list_uids=21177974&dopt=DocSum	http://www.modencode.org/White.shtml	21177974(MI:0225(ChIP-chip) and ChIP-seq)	null	modENCODE-24-JAN-11	http://www.modencode.org/White.shtml	2014-10-01	pd
FBgn0261434	FBgn0004055	hkb	uzip	PDI: Transcription factor-Gene	0.3464	-	uzip	hkb	21177974	http://www.ncbi.nlm.nih.gov/sites/entrez?cmd=retrieve&db=pubmed&list_uids=21177974&dopt=DocSum	http://www.modencode.org/White.shtml	21177974(MI:0225(ChIP-chip) and ChIP-seq)	null	modENCODE-24-JAN-11	http://www.modencode.org/White.shtml	2014-10-01	pd
FBgn0261434	FBgn0011762	hkb	DNApol-alpha50	PDI: Transcription factor-Gene	0.565	-	DNApol-Œ±50	hkb	21177974	http://www.ncbi.nlm.nih.gov/sites/entrez?cmd=retrieve&db=pubmed&list_uids=21177974&dopt=DocSum	http://www.modencode.org/White.shtml	21177974(MI:0225(ChIP-chip) and ChIP-seq)	null	modENCODE-24-JAN-11	http://www.modencode.org/White.shtml	2014-10-01	pd
FBgn0261434	FBgn0037686	hkb	RpL34b	PDI: Transcription factor-Gene	0.1132	-	RpL34b	hkb	21177974	http://www.ncbi.nlm.nih.gov/sites/entrez?cmd=retrieve&db=pubmed&list_uids=21177974&dopt=DocSum	http://www.modencode.org/White.shtml	21177974(MI:0225(ChIP-chip) and ChIP-seq)	null	modENCODE-24-JAN-11	http://www.modencode.org/White.shtml	2014-10-01	pd
FBgn0261434	FBgn0036556	hkb	CG5830	PDI: Transcription factor-Gene	0.2619	-	CG5830	hkb	21177974	http://www.ncbi.nlm.nih.gov/sites/entrez?cmd=retrieve&db=pubmed&list_uids=21177974&dopt=DocSum	http://www.modencode.org/White.shtml	21177974(MI:0225(ChIP-chip) and ChIP-seq)	null	modENCODE-24-JAN-11	http://www.modencode.org/White.shtml	2014-10-01	pd
FBgn0261434	FBgn0037687	hkb	CG8132	PDI: Transcription factor-Gene	-0.194	-	CG8132	hkb	21177974	http://www.ncbi.nlm.nih.gov/sites/entrez?cmd=retrieve&db=pubmed&list_uids=21177974&dopt=DocSum	http://www.modencode.org/White.shtml	21177974(MI:0225(ChIP-chip) and ChIP-seq)	null	modENCODE-24-JAN-11	http://www.modencode.org/White.shtml	2014-10-01	pd
FBgn0261434	FBgn0036557	hkb	mRpS31	PDI: Transcription factor-Gene	0.23	-	mRpS31	hkb	21177974	http://www.ncbi.nlm.nih.gov/sites/entrez?cmd=retrieve&db=pubmed&list_uids=21177974&dopt=DocSum	http://www.modencode.org/White.shtml	21177974(MI:0225(ChIP-chip) and ChIP-seq)	null	modENCODE-24-JAN-11	http://www.modencode.org/White.shtml	2014-10-01	pd
FBgn0261434	FBgn0031098	hkb	CG17068	PDI: Transcription factor-Gene	0.6076	-	CG17068	hkb	21177974	http://www.ncbi.nlm.nih.gov/sites/entrez?cmd=retrieve&db=pubmed&list_uids=21177974&dopt=DocSum	http://www.modencode.org/White.shtml	21177974(MI:0225(ChIP-chip) and ChIP-seq)	null	modENCODE-24-JAN-11	http://www.modencode.org/White.shtml	2014-10-01	pd
FBgn0261434	FBgn0011766	hkb	E2f1	PDI: Transcription factor-Gene	0.7057	-	E2f1	hkb	21177974	http://www.ncbi.nlm.nih.gov/sites/entrez?cmd=retrieve&db=pubmed&list_uids=21177974&dopt=DocSum	http://www.modencode.org/White.shtml	21177974(MI:0225(ChIP-chip) and ChIP-seq)	null	modENCODE-24-JAN-11	http://www.modencode.org/White.shtml	2014-10-01	pd
FBgn0261434	FBgn0004053	hkb	zen	PDI: Transcription factor-Gene	0.5866	-	zen	hkb	21177974	http://www.ncbi.nlm.nih.gov/sites/entrez?cmd=retrieve&db=pubmed&list_uids=21177974&dopt=DocSum	http://www.modencode.org/White.shtml	21177974(MI:0225(ChIP-chip) and ChIP-seq)	null	modENCODE-24-JAN-11	http://www.modencode.org/White.shtml	2014-10-01	pd
FBgn0261434	FBgn0261618	hkb	larp	PDI: Transcription factor-Gene	0.1428	-	larp	hkb	21177974	http://www.ncbi.nlm.nih.gov/sites/entrez?cmd=retrieve&db=pubmed&list_uids=21177974&dopt=DocSum	http://www.modencode.org/White.shtml	21177974(MI:0225(ChIP-chip) and ChIP-seq)	null	modENCODE-24-JAN-11	http://www.modencode.org/White.shtml	2014-10-01	pd
FBgn0261434	FBgn0003411	hkb	sisA	PDI: Transcription factor-Gene	0.4992	-	sisA	hkb	21177974	http://www.ncbi.nlm.nih.gov/sites/entrez?cmd=retrieve&db=pubmed&list_uids=21177974&dopt=DocSum	http://www.modencode.org/White.shtml	21177974(MI:0225(ChIP-chip) and ChIP-seq)	null	modENCODE-24-JAN-11	http://www.modencode.org/White.shtml	2014-10-01	pd
FBgn0261434	FBgn0261610	hkb	CG42699	PDI: Transcription factor-Gene	0.2665	-	CG42699	hkb	21177974	http://www.ncbi.nlm.nih.gov/sites/entrez?cmd=retrieve&db=pubmed&list_uids=21177974&dopt=DocSum	http://www.modencode.org/White.shtml	21177974(MI:0225(ChIP-chip) and ChIP-seq)	null	modENCODE-24-JAN-11	http://www.modencode.org/White.shtml	2014-10-01	pd
FBgn0261434	FBgn0031292	hkb	CG15824	PDI: Transcription factor-Gene	-0.1906	-	CG15824	hkb	21177974	http://www.ncbi.nlm.nih.gov/sites/entrez?cmd=retrieve&db=pubmed&list_uids=21177974&dopt=DocSum	http://www.modencode.org/White.shtml	21177974(MI:0225(ChIP-chip) and ChIP-seq)	null	modENCODE-24-JAN-11	http://www.modencode.org/White.shtml	2014-10-01	pd
FBgn0261434	FBgn0030499	hkb	CG11178	PDI: Transcription factor-Gene	-0.0518	-	CG11178	hkb	21177974	http://www.ncbi.nlm.nih.gov/sites/entrez?cmd=retrieve&db=pubmed&list_uids=21177974&dopt=DocSum	http://www.modencode.org/White.shtml	21177974(MI:0225(ChIP-chip) and ChIP-seq)	null	modENCODE-24-JAN-11	http://www.modencode.org/White.shtml	2014-10-01	pd
FBgn0261434	FBgn0004050	hkb	z	PDI: Transcription factor-Gene	0.7863	-	z	hkb	21177974	http://www.ncbi.nlm.nih.gov/sites/entrez?cmd=retrieve&db=pubmed&list_uids=21177974&dopt=DocSum	http://www.modencode.org/White.shtml	21177974(MI:0225(ChIP-chip) and ChIP-seq)	null	modENCODE-24-JAN-11	http://www.modencode.org/White.shtml	2014-10-01	pd
FBgn0261434	FBgn0031738	hkb	CG9171	PDI: Transcription factor-Gene	-0.0891	-	CG9171	hkb	21177974	http://www.ncbi.nlm.nih.gov/sites/entrez?cmd=retrieve&db=pubmed&list_uids=21177974&dopt=DocSum	http://www.modencode.org/White.shtml	21177974(MI:0225(ChIP-chip) and ChIP-seq)	null	modENCODE-24-JAN-11	http://www.modencode.org/White.shtml	2014-10-01	pd
FBgn0261434	FBgn0045852	hkb	ham	PDI: Transcription factor-Gene	0.5006	-	ham	hkb	21177974	http://www.ncbi.nlm.nih.gov/sites/entrez?cmd=retrieve&db=pubmed&list_uids=21177974&dopt=DocSum	http://www.modencode.org/White.shtml	21177974(MI:0225(ChIP-chip) and ChIP-seq)	null	modENCODE-24-JAN-11	http://www.modencode.org/White.shtml	2014-10-01	pd
FBgn0261434	FBgn0026666	hkb	MagR	PDI: Transcription factor-Gene	-0.0704	-	l(1)G0136	hkb	21177974	http://www.ncbi.nlm.nih.gov/sites/entrez?cmd=retrieve&db=pubmed&list_uids=21177974&dopt=DocSum	http://www.modencode.org/White.shtml	21177974(MI:0225(ChIP-chip) and ChIP-seq)	null	modENCODE-24-JAN-11	http://www.modencode.org/White.shtml	2014-10-01	pd
FBgn0261434	FBgn0030456	hkb	CG4332	PDI: Transcription factor-Gene	0.2706	-	CG4332	hkb	21177974	http://www.ncbi.nlm.nih.gov/sites/entrez?cmd=retrieve&db=pubmed&list_uids=21177974&dopt=DocSum	http://www.modencode.org/White.shtml	21177974(MI:0225(ChIP-chip) and ChIP-seq)	null	modENCODE-24-JAN-11	http://www.modencode.org/White.shtml	2014-10-01	pd
FBgn0261434	FBgn0040397	hkb	CG3655	PDI: Transcription factor-Gene	0.1483	-	CG3655	hkb	21177974	http://www.ncbi.nlm.nih.gov/sites/entrez?cmd=retrieve&db=pubmed&list_uids=21177974&dopt=DocSum	http://www.modencode.org/White.shtml	21177974(MI:0225(ChIP-chip) and ChIP-seq)	null	modENCODE-24-JAN-11	http://www.modencode.org/White.shtml	2014-10-01	pd
FBgn0261434	FBgn0036522	hkb	CG7372	PDI: Transcription factor-Gene	0.8449	-	CG7372	hkb	21177974	http://www.ncbi.nlm.nih.gov/sites/entrez?cmd=retrieve&db=pubmed&list_uids=21177974&dopt=DocSum	http://www.modencode.org/White.shtml	21177974(MI:0225(ChIP-chip) and ChIP-seq)	null	modENCODE-24-JAN-11	http://www.modencode.org/White.shtml	2014-10-01	pd
FBgn0261434	FBgn0037655	hkb	Kcmf1	PDI: Transcription factor-Gene	-0.1096	-	CG11984	hkb	21177974	http://www.ncbi.nlm.nih.gov/sites/entrez?cmd=retrieve&db=pubmed&list_uids=21177974&dopt=DocSum	http://www.modencode.org/White.shtml	21177974(MI:0225(ChIP-chip) and ChIP-seq)	null	modENCODE-24-JAN-11	http://www.modencode.org/White.shtml	2014-10-01	pd
FBgn0261434	FBgn0037656	hkb	CG11986	PDI: Transcription factor-Gene	0.5205	-	CG11986	hkb	21177974	http://www.ncbi.nlm.nih.gov/sites/entrez?cmd=retrieve&db=pubmed&list_uids=21177974&dopt=DocSum	http://www.modencode.org/White.shtml	21177974(MI:0225(ChIP-chip) and ChIP-seq)	null	modENCODE-24-JAN-11	http://www.modencode.org/White.shtml	2014-10-01	pd
FBgn0261434	FBgn0262127	hkb	kibra	PDI: Transcription factor-Gene	0.1589	-	kibra	hkb	21177974	http://www.ncbi.nlm.nih.gov/sites/entrez?cmd=retrieve&db=pubmed&list_uids=21177974&dopt=DocSum	http://www.modencode.org/White.shtml	21177974(MI:0225(ChIP-chip) and ChIP-seq)	null	modENCODE-24-JAN-11	http://www.modencode.org/White.shtml	2014-10-01	pd
FBgn0261434	FBgn0051195	hkb	CG31195	PDI: Transcription factor-Gene	0.2941	-	CG31195	hkb	21177974	http://www.ncbi.nlm.nih.gov/sites/entrez?cmd=retrieve&db=pubmed&list_uids=21177974&dopt=DocSum	http://www.modencode.org/White.shtml	21177974(MI:0225(ChIP-chip) and ChIP-seq)	null	modENCODE-24-JAN-11	http://www.modencode.org/White.shtml	2014-10-01	pd
FBgn0261434	FBgn0039055	hkb	Rassf	PDI: Transcription factor-Gene	0.3206	-	Rassf	hkb	21177974	http://www.ncbi.nlm.nih.gov/sites/entrez?cmd=retrieve&db=pubmed&list_uids=21177974&dopt=DocSum	http://www.modencode.org/White.shtml	21177974(MI:0225(ChIP-chip) and ChIP-seq)	null	modENCODE-24-JAN-11	http://www.modencode.org/White.shtml	2014-10-01	pd
FBgn0261434	FBgn0039056	hkb	CenB1A	PDI: Transcription factor-Gene	0.2376	-	CenB1A	hkb	21177974	http://www.ncbi.nlm.nih.gov/sites/entrez?cmd=retrieve&db=pubmed&list_uids=21177974&dopt=DocSum	http://www.modencode.org/White.shtml	21177974(MI:0225(ChIP-chip) and ChIP-seq)	null	modENCODE-24-JAN-11	http://www.modencode.org/White.shtml	2014-10-01	pd
FBgn0261434	FBgn0029789	hkb	PGAP1	PDI: Transcription factor-Gene	0.2889	-	CG3160	hkb	21177974	http://www.ncbi.nlm.nih.gov/sites/entrez?cmd=retrieve&db=pubmed&list_uids=21177974&dopt=DocSum	http://www.modencode.org/White.shtml	21177974(MI:0225(ChIP-chip) and ChIP-seq)	null	modENCODE-24-JAN-11	http://www.modencode.org/White.shtml	2014-10-01	pd
FBgn0261434	FBgn0001077	hkb	ftz	PDI: Transcription factor-Gene	0.3959	-	ftz	hkb	21177974	http://www.ncbi.nlm.nih.gov/sites/entrez?cmd=retrieve&db=pubmed&list_uids=21177974&dopt=DocSum	http://www.modencode.org/White.shtml	21177974(MI:0225(ChIP-chip) and ChIP-seq)	null	modENCODE-24-JAN-11	http://www.modencode.org/White.shtml	2014-10-01	pd
FBgn0261434	FBgn0003189	hkb	r	PDI: Transcription factor-Gene	0.0197	-	r	hkb	21177974	http://www.ncbi.nlm.nih.gov/sites/entrez?cmd=retrieve&db=pubmed&list_uids=21177974&dopt=DocSum	http://www.modencode.org/White.shtml	21177974(MI:0225(ChIP-chip) and ChIP-seq)	null	modENCODE-24-JAN-11	http://www.modencode.org/White.shtml	2014-10-01	pd
FBgn0261434	FBgn0040780	hkb	Atg10	PDI: Transcription factor-Gene	-0.0761	-	Atg10	hkb	21177974	http://www.ncbi.nlm.nih.gov/sites/entrez?cmd=retrieve&db=pubmed&list_uids=21177974&dopt=DocSum	http://www.modencode.org/White.shtml	21177974(MI:0225(ChIP-chip) and ChIP-seq)	null	modENCODE-24-JAN-11	http://www.modencode.org/White.shtml	2014-10-01	pd
FBgn0261434	FBgn0259699	hkb	CG42353	PDI: Transcription factor-Gene	-0.2646	-	CG42353	hkb	21177974	http://www.ncbi.nlm.nih.gov/sites/entrez?cmd=retrieve&db=pubmed&list_uids=21177974&dopt=DocSum	http://www.modencode.org/White.shtml	21177974(MI:0225(ChIP-chip) and ChIP-seq)	null	modENCODE-24-JAN-11	http://www.modencode.org/White.shtml	2014-10-01	pd
FBgn0261434	FBgn0000077	hkb	amx	PDI: Transcription factor-Gene	-0.1173	-	amx	hkb	21177974	http://www.ncbi.nlm.nih.gov/sites/entrez?cmd=retrieve&db=pubmed&list_uids=21177974&dopt=DocSum	http://www.modencode.org/White.shtml	21177974(MI:0225(ChIP-chip) and ChIP-seq)	null	modENCODE-24-JAN-11	http://www.modencode.org/White.shtml	2014-10-01	pd
FBgn0261434	FBgn0038386	hkb	CG5478	PDI: Transcription factor-Gene	-0.1725	-	CG5478	hkb	21177974	http://www.ncbi.nlm.nih.gov/sites/entrez?cmd=retrieve&db=pubmed&list_uids=21177974&dopt=DocSum	http://www.modencode.org/White.shtml	21177974(MI:0225(ChIP-chip) and ChIP-seq)	null	modENCODE-24-JAN-11	http://www.modencode.org/White.shtml	2014-10-01	pd
FBgn0261434	FBgn0038387	hkb	blp	PDI: Transcription factor-Gene	-0.0508	-	blp	hkb	21177974	http://www.ncbi.nlm.nih.gov/sites/entrez?cmd=retrieve&db=pubmed&list_uids=21177974&dopt=DocSum	http://www.modencode.org/White.shtml	21177974(MI:0225(ChIP-chip) and ChIP-seq)	null	modENCODE-24-JAN-11	http://www.modencode.org/White.shtml	2014-10-01	pd
FBgn0261434	FBgn0031286	hkb	CG3862	PDI: Transcription factor-Gene	0.3001	-	CG3862	hkb	21177974	http://www.ncbi.nlm.nih.gov/sites/entrez?cmd=retrieve&db=pubmed&list_uids=21177974&dopt=DocSum	http://www.modencode.org/White.shtml	21177974(MI:0225(ChIP-chip) and ChIP-seq)	null	modENCODE-24-JAN-11	http://www.modencode.org/White.shtml	2014-10-01	pd
FBgn0261434	FBgn0015240	hkb	Hr96	PDI: Transcription factor-Gene	-0.2515	-	Hr96	hkb	21177974	http://www.ncbi.nlm.nih.gov/sites/entrez?cmd=retrieve&db=pubmed&list_uids=21177974&dopt=DocSum	http://www.modencode.org/White.shtml	21177974(MI:0225(ChIP-chip) and ChIP-seq)	null	modENCODE-24-JAN-11	http://www.modencode.org/White.shtml	2014-10-01	pd
FBgn0261434	FBgn0262515	hkb	VhaAC45	PDI: Transcription factor-Gene	-0.2989	-	VhaAC45	hkb	21177974	http://www.ncbi.nlm.nih.gov/sites/entrez?cmd=retrieve&db=pubmed&list_uids=21177974&dopt=DocSum	http://www.modencode.org/White.shtml	21177974(MI:0225(ChIP-chip) and ChIP-seq)	null	modENCODE-24-JAN-11	http://www.modencode.org/White.shtml	2014-10-01	pd
FBgn0261434	FBgn0020261	hkb	pcm	PDI: Transcription factor-Gene	0.5572	-	pcm	hkb	21177974	http://www.ncbi.nlm.nih.gov/sites/entrez?cmd=retrieve&db=pubmed&list_uids=21177974&dopt=DocSum	http://www.modencode.org/White.shtml	21177974(MI:0225(ChIP-chip) and ChIP-seq)	null	modENCODE-24-JAN-11	http://www.modencode.org/White.shtml	2014-10-01	pd
FBgn0261434	FBgn0260794	hkb	ctrip	PDI: Transcription factor-Gene	0.3159	-	ctrip	hkb	21177974	http://www.ncbi.nlm.nih.gov/sites/entrez?cmd=retrieve&db=pubmed&list_uids=21177974&dopt=DocSum	http://www.modencode.org/White.shtml	21177974(MI:0225(ChIP-chip) and ChIP-seq)	null	modENCODE-24-JAN-11	http://www.modencode.org/White.shtml	2014-10-01	pd
FBgn0261434	FBgn0015245	hkb	Hsp60A	PDI: Transcription factor-Gene	-0.0468	-	Hsp60	hkb	21177974	http://www.ncbi.nlm.nih.gov/sites/entrez?cmd=retrieve&db=pubmed&list_uids=21177974&dopt=DocSum	http://www.modencode.org/White.shtml	21177974(MI:0225(ChIP-chip) and ChIP-seq)	null	modENCODE-24-JAN-11	http://www.modencode.org/White.shtml	2014-10-01	pd
FBgn0261434	FBgn0000071	hkb	Ama	PDI: Transcription factor-Gene	0.5002	-	Ama	hkb	21177974	http://www.ncbi.nlm.nih.gov/sites/entrez?cmd=retrieve&db=pubmed&list_uids=21177974&dopt=DocSum	http://www.modencode.org/White.shtml	21177974(MI:0225(ChIP-chip) and ChIP-seq)	null	modENCODE-24-JAN-11	http://www.modencode.org/White.shtml	2014-10-01	pd
FBgn0261434	FBgn0262519	hkb	Mi-2	PDI: Transcription factor-Gene	0.827	-	Mi-2	hkb	21177974	http://www.ncbi.nlm.nih.gov/sites/entrez?cmd=retrieve&db=pubmed&list_uids=21177974&dopt=DocSum	http://www.modencode.org/White.shtml	21177974(MI:0225(ChIP-chip) and ChIP-seq)	null	modENCODE-24-JAN-11	http://www.modencode.org/White.shtml	2014-10-01	pd
FBgn0261434	FBgn0023213	hkb	eIF4G1	PDI: Transcription factor-Gene	-0.0355	-	eIF4G	hkb	21177974	http://www.ncbi.nlm.nih.gov/sites/entrez?cmd=retrieve&db=pubmed&list_uids=21177974&dopt=DocSum	http://www.modencode.org/White.shtml	21177974(MI:0225(ChIP-chip) and ChIP-seq)	null	modENCODE-24-JAN-11	http://www.modencode.org/White.shtml	2014-10-01	pd
FBgn0261434	FBgn0038385	hkb	Fbxl7	PDI: Transcription factor-Gene	0.29	-	Fbxl7	hkb	21177974	http://www.ncbi.nlm.nih.gov/sites/entrez?cmd=retrieve&db=pubmed&list_uids=21177974&dopt=DocSum	http://www.modencode.org/White.shtml	21177974(MI:0225(ChIP-chip) and ChIP-seq)	null	modENCODE-24-JAN-11	http://www.modencode.org/White.shtml	2014-10-01	pd
FBgn0261434	FBgn0036536	hkb	CG12713	PDI: Transcription factor-Gene	0.445	-	CG12713	hkb	21177974	http://www.ncbi.nlm.nih.gov/sites/entrez?cmd=retrieve&db=pubmed&list_uids=21177974&dopt=DocSum	http://www.modencode.org/White.shtml	21177974(MI:0225(ChIP-chip) and ChIP-seq)	null	modENCODE-24-JAN-11	http://www.modencode.org/White.shtml	2014-10-01	pd
FBgn0261434	FBgn0040388	hkb	boi	PDI: Transcription factor-Gene	0.4261	-	boi	hkb	21177974	http://www.ncbi.nlm.nih.gov/sites/entrez?cmd=retrieve&db=pubmed&list_uids=21177974&dopt=DocSum	http://www.modencode.org/White.shtml	21177974(MI:0225(ChIP-chip) and ChIP-seq)	null	modENCODE-24-JAN-11	http://www.modencode.org/White.shtml	2014-10-01	pd
FBgn0261434	FBgn0038593	hkb	Vps39	PDI: Transcription factor-Gene	0.2902	-	Vps39	hkb	21177974	http://www.ncbi.nlm.nih.gov/sites/entrez?cmd=retrieve&db=pubmed&list_uids=21177974&dopt=DocSum	http://www.modencode.org/White.shtml	21177974(MI:0225(ChIP-chip) and ChIP-seq)	null	modENCODE-24-JAN-11	http://www.modencode.org/White.shtml	2014-10-01	pd
FBgn0261434	FBgn0003430	hkb	slp1	PDI: Transcription factor-Gene	0.8338	-	slp1	hkb	21177974	http://www.ncbi.nlm.nih.gov/sites/entrez?cmd=retrieve&db=pubmed&list_uids=21177974&dopt=DocSum	http://www.modencode.org/White.shtml	21177974(MI:0225(ChIP-chip) and ChIP-seq)	null	modENCODE-24-JAN-11	http://www.modencode.org/White.shtml	2014-10-01	pd
FBgn0261434	FBgn0039066	hkb	EloA	PDI: Transcription factor-Gene	0.5246	-	EloA	hkb	21177974	http://www.ncbi.nlm.nih.gov/sites/entrez?cmd=retrieve&db=pubmed&list_uids=21177974&dopt=DocSum	http://www.modencode.org/White.shtml	21177974(MI:0225(ChIP-chip) and ChIP-seq)	null	modENCODE-24-JAN-11	http://www.modencode.org/White.shtml	2014-10-01	pd
FBgn0261434	FBgn0039065	hkb	Rad60	PDI: Transcription factor-Gene	0.3976	-	CG4449	hkb	21177974	http://www.ncbi.nlm.nih.gov/sites/entrez?cmd=retrieve&db=pubmed&list_uids=21177974&dopt=DocSum	http://www.modencode.org/White.shtml	21177974(MI:0225(ChIP-chip) and ChIP-seq)	null	modENCODE-24-JAN-11	http://www.modencode.org/White.shtml	2014-10-01	pd
FBgn0261434	FBgn0031597	hkb	CG17612	PDI: Transcription factor-Gene	0.7077	-	CG17612	hkb	21177974	http://www.ncbi.nlm.nih.gov/sites/entrez?cmd=retrieve&db=pubmed&list_uids=21177974&dopt=DocSum	http://www.modencode.org/White.shtml	21177974(MI:0225(ChIP-chip) and ChIP-seq)	null	modENCODE-24-JAN-11	http://www.modencode.org/White.shtml	2014-10-01	pd
FBgn0261434	FBgn0040786	hkb	CG14104	PDI: Transcription factor-Gene	0.4095	-	CG14104	hkb	21177974	http://www.ncbi.nlm.nih.gov/sites/entrez?cmd=retrieve&db=pubmed&list_uids=21177974&dopt=DocSum	http://www.modencode.org/White.shtml	21177974(MI:0225(ChIP-chip) and ChIP-seq)	null	modENCODE-24-JAN-11	http://www.modencode.org/White.shtml	2014-10-01	pd
FBgn0261434	FBgn0003175	hkb	px	PDI: Transcription factor-Gene	-0.1865	-	px	hkb	21177974	http://www.ncbi.nlm.nih.gov/sites/entrez?cmd=retrieve&db=pubmed&list_uids=21177974&dopt=DocSum	http://www.modencode.org/White.shtml	21177974(MI:0225(ChIP-chip) and ChIP-seq)	null	modENCODE-24-JAN-11	http://www.modencode.org/White.shtml	2014-10-01	pd
FBgn0261434	FBgn0001087	hkb	g	PDI: Transcription factor-Gene	0.2432	-	g	hkb	21177974	http://www.ncbi.nlm.nih.gov/sites/entrez?cmd=retrieve&db=pubmed&list_uids=21177974&dopt=DocSum	http://www.modencode.org/White.shtml	21177974(MI:0225(ChIP-chip) and ChIP-seq)	null	modENCODE-24-JAN-11	http://www.modencode.org/White.shtml	2014-10-01	pd
FBgn0261434	FBgn0004959	hkb	phm	PDI: Transcription factor-Gene	0.8783	-	phm	hkb	21177974	http://www.ncbi.nlm.nih.gov/sites/entrez?cmd=retrieve&db=pubmed&list_uids=21177974&dopt=DocSum	http://www.modencode.org/White.shtml	21177974(MI:0225(ChIP-chip) and ChIP-seq)	null	modENCODE-24-JAN-11	http://www.modencode.org/White.shtml	2014-10-01	pd
FBgn0261434	FBgn0040793	hkb	CG7630	PDI: Transcription factor-Gene	-0.2518	-	CG7630	hkb	21177974	http://www.ncbi.nlm.nih.gov/sites/entrez?cmd=retrieve&db=pubmed&list_uids=21177974&dopt=DocSum	http://www.modencode.org/White.shtml	21177974(MI:0225(ChIP-chip) and ChIP-seq)	null	modENCODE-24-JAN-11	http://www.modencode.org/White.shtml	2014-10-01	pd
FBgn0261434	FBgn0020278	hkb	loco	PDI: Transcription factor-Gene	0.312	-	loco	hkb	21177974	http://www.ncbi.nlm.nih.gov/sites/entrez?cmd=retrieve&db=pubmed&list_uids=21177974&dopt=DocSum	http://www.modencode.org/White.shtml	21177974(MI:0225(ChIP-chip) and ChIP-seq)	null	modENCODE-24-JAN-11	http://www.modencode.org/White.shtml	2014-10-01	pd
FBgn0261434	FBgn0031270	hkb	CG13689	PDI: Transcription factor-Gene	0.5071	-	CG13689	hkb	21177974	http://www.ncbi.nlm.nih.gov/sites/entrez?cmd=retrieve&db=pubmed&list_uids=21177974&dopt=DocSum	http://www.modencode.org/White.shtml	21177974(MI:0225(ChIP-chip) and ChIP-seq)	null	modENCODE-24-JAN-11	http://www.modencode.org/White.shtml	2014-10-01	pd
FBgn0261434	FBgn0267975	hkb	vib	PDI: Transcription factor-Gene	-0.5042	-	vib	hkb	21177974	http://www.ncbi.nlm.nih.gov/sites/entrez?cmd=retrieve&db=pubmed&list_uids=21177974&dopt=DocSum	http://www.modencode.org/White.shtml	21177974(MI:0225(ChIP-chip) and ChIP-seq)	null	modENCODE-24-JAN-11	http://www.modencode.org/White.shtml	2014-10-01	pd
FBgn0261434	FBgn0267977	hkb	mh	PDI: Transcription factor-Gene	0.2551	-	mh	hkb	21177974	http://www.ncbi.nlm.nih.gov/sites/entrez?cmd=retrieve&db=pubmed&list_uids=21177974&dopt=DocSum	http://www.modencode.org/White.shtml	21177974(MI:0225(ChIP-chip) and ChIP-seq)	null	modENCODE-24-JAN-11	http://www.modencode.org/White.shtml	2014-10-01	pd
FBgn0261434	FBgn0051301	hkb	CG31301	PDI: Transcription factor-Gene	0.7534	-	CG31301	hkb	21177974	http://www.ncbi.nlm.nih.gov/sites/entrez?cmd=retrieve&db=pubmed&list_uids=21177974&dopt=DocSum	http://www.modencode.org/White.shtml	21177974(MI:0225(ChIP-chip) and ChIP-seq)	null	modENCODE-24-JAN-11	http://www.modencode.org/White.shtml	2014-10-01	pd
FBgn0261434	FBgn0267978	hkb	ap	PDI: Transcription factor-Gene	-0.2767	-	ap	hkb	21177974	http://www.ncbi.nlm.nih.gov/sites/entrez?cmd=retrieve&db=pubmed&list_uids=21177974&dopt=DocSum	http://www.modencode.org/White.shtml	21177974(MI:0225(ChIP-chip) and ChIP-seq)	null	modENCODE-24-JAN-11	http://www.modencode.org/White.shtml	2014-10-01	pd
FBgn0261434	FBgn0283473	hkb	S6KL	PDI: Transcription factor-Gene	0.1342	-	S6KL	hkb	21177974	http://www.ncbi.nlm.nih.gov/sites/entrez?cmd=retrieve&db=pubmed&list_uids=21177974&dopt=DocSum	http://www.modencode.org/White.shtml	21177974(MI:0225(ChIP-chip) and ChIP-seq)	null	modENCODE-24-JAN-11	http://www.modencode.org/White.shtml	2014-10-01	pd
FBgn0261434	FBgn0034418	hkb	CG15118	PDI: Transcription factor-Gene	-0.1917	-	CG15118	hkb	21177974	http://www.ncbi.nlm.nih.gov/sites/entrez?cmd=retrieve&db=pubmed&list_uids=21177974&dopt=DocSum	http://www.modencode.org/White.shtml	21177974(MI:0225(ChIP-chip) and ChIP-seq)	null	modENCODE-24-JAN-11	http://www.modencode.org/White.shtml	2014-10-01	pd
FBgn0261434	FBgn0283472	hkb	S6k	PDI: Transcription factor-Gene	0.0372	-	S6k	hkb	21177974	http://www.ncbi.nlm.nih.gov/sites/entrez?cmd=retrieve&db=pubmed&list_uids=21177974&dopt=DocSum	http://www.modencode.org/White.shtml	21177974(MI:0225(ChIP-chip) and ChIP-seq)	null	modENCODE-24-JAN-11	http://www.modencode.org/White.shtml	2014-10-01	pd
FBgn0261434	FBgn0038396	hkb	CG5013	PDI: Transcription factor-Gene	0.5261	-	CG5013	hkb	21177974	http://www.ncbi.nlm.nih.gov/sites/entrez?cmd=retrieve&db=pubmed&list_uids=21177974&dopt=DocSum	http://www.modencode.org/White.shtml	21177974(MI:0225(ChIP-chip) and ChIP-seq)	null	modENCODE-24-JAN-11	http://www.modencode.org/White.shtml	2014-10-01	pd
FBgn0261434	FBgn0262527	hkb	nsl1	PDI: Transcription factor-Gene	0.7143	-	nsl1	hkb	21177974	http://www.ncbi.nlm.nih.gov/sites/entrez?cmd=retrieve&db=pubmed&list_uids=21177974&dopt=DocSum	http://www.modencode.org/White.shtml	21177974(MI:0225(ChIP-chip) and ChIP-seq)	null	modENCODE-24-JAN-11	http://www.modencode.org/White.shtml	2014-10-01	pd
FBgn0261434	FBgn0034417	hkb	CG15117	PDI: Transcription factor-Gene	-0.2108	-	CG15117	hkb	21177974	http://www.ncbi.nlm.nih.gov/sites/entrez?cmd=retrieve&db=pubmed&list_uids=21177974&dopt=DocSum	http://www.modencode.org/White.shtml	21177974(MI:0225(ChIP-chip) and ChIP-seq)	null	modENCODE-24-JAN-11	http://www.modencode.org/White.shtml	2014-10-01	pd
FBgn0261434	FBgn0261648	hkb	salm	PDI: Transcription factor-Gene	0.5172	-	salm	hkb	9376314	http://www.ncbi.nlm.nih.gov/sites/entrez?cmd=retrieve&db=pubmed&list_uids=9376314&dopt=DocSum	http://redfly.ccr.buffalo.edu/	9376314(MI:0606(footprint/binding assay))	null	REDfly-18-JAN-11	http://redfly.ccr.buffalo.edu/	2014-10-01	pd
FBgn0261434	FBgn0026430	hkb	Grip84	PDI: Transcription factor-Gene	0.1391	-	Grip84	hkb	21177974	http://www.ncbi.nlm.nih.gov/sites/entrez?cmd=retrieve&db=pubmed&list_uids=21177974&dopt=DocSum	http://www.modencode.org/White.shtml	21177974(MI:0225(ChIP-chip) and ChIP-seq)	null	modENCODE-24-JAN-11	http://www.modencode.org/White.shtml	2014-10-01	pd
FBgn0261434	FBgn0022349	hkb	CG1910	PDI: Transcription factor-Gene	0.5668	-	CG1910	hkb	21177974	http://www.ncbi.nlm.nih.gov/sites/entrez?cmd=retrieve&db=pubmed&list_uids=21177974&dopt=DocSum	http://www.modencode.org/White.shtml	21177974(MI:0225(ChIP-chip) and ChIP-seq)	null	modENCODE-24-JAN-11	http://www.modencode.org/White.shtml	2014-10-01	pd
FBgn0261434	FBgn0029114	hkb	Tollo	PDI: Transcription factor-Gene	0.6204	-	Tollo	hkb	21177974	http://www.ncbi.nlm.nih.gov/sites/entrez?cmd=retrieve&db=pubmed&list_uids=21177974&dopt=DocSum	http://www.modencode.org/White.shtml	21177974(MI:0225(ChIP-chip) and ChIP-seq)	null	modENCODE-24-JAN-11	http://www.modencode.org/White.shtml	2014-10-01	pd
FBgn0261434	FBgn0031969	hkb	pes	PDI: Transcription factor-Gene	-0.1728	-	pes	hkb	21177974	http://www.ncbi.nlm.nih.gov/sites/entrez?cmd=retrieve&db=pubmed&list_uids=21177974&dopt=DocSum	http://www.modencode.org/White.shtml	21177974(MI:0225(ChIP-chip) and ChIP-seq)	null	modENCODE-24-JAN-11	http://www.modencode.org/White.shtml	2014-10-01	pd
FBgn0261434	FBgn0262736	hkb	Vha16-1	PDI: Transcription factor-Gene	-0.3141	-	Vha16-1	hkb	21177974	http://www.ncbi.nlm.nih.gov/sites/entrez?cmd=retrieve&db=pubmed&list_uids=21177974&dopt=DocSum	http://www.modencode.org/White.shtml	21177974(MI:0225(ChIP-chip) and ChIP-seq)	null	modENCODE-24-JAN-11	http://www.modencode.org/White.shtml	2014-10-01	pd
FBgn0261434	FBgn0003464	hkb	sol	PDI: Transcription factor-Gene	0.3196	-	sol	hkb	21177974	http://www.ncbi.nlm.nih.gov/sites/entrez?cmd=retrieve&db=pubmed&list_uids=21177974&dopt=DocSum	http://www.modencode.org/White.shtml	21177974(MI:0225(ChIP-chip) and ChIP-seq)	null	modENCODE-24-JAN-11	http://www.modencode.org/White.shtml	2014-10-01	pd
FBgn0261434	FBgn0028686	hkb	Rpt3	PDI: Transcription factor-Gene	-0.1196	-	Rpt3	hkb	21177974	http://www.ncbi.nlm.nih.gov/sites/entrez?cmd=retrieve&db=pubmed&list_uids=21177974&dopt=DocSum	http://www.modencode.org/White.shtml	21177974(MI:0225(ChIP-chip) and ChIP-seq)	null	modENCODE-24-JAN-11	http://www.modencode.org/White.shtml	2014-10-01	pd
FBgn0261434	FBgn0003460	hkb	so	PDI: Transcription factor-Gene	0.1306	-	so	hkb	21177974	http://www.ncbi.nlm.nih.gov/sites/entrez?cmd=retrieve&db=pubmed&list_uids=21177974&dopt=DocSum	http://www.modencode.org/White.shtml	21177974(MI:0225(ChIP-chip) and ChIP-seq)	null	modENCODE-24-JAN-11	http://www.modencode.org/White.shtml	2014-10-01	pd
FBgn0261434	FBgn0011710	hkb	37135	PDI: Transcription factor-Gene	-	-	2001-09-01	hkb	21177974	http://www.ncbi.nlm.nih.gov/sites/entrez?cmd=retrieve&db=pubmed&list_uids=21177974&dopt=DocSum	http://www.modencode.org/White.shtml	21177974(MI:0225(ChIP-chip) and ChIP-seq)	null	modENCODE-24-JAN-11	http://www.modencode.org/White.shtml	2014-10-01	pd
FBgn0261434	FBgn0263873	hkb	sick	PDI: Transcription factor-Gene	0.106	-	sick	hkb	21177974	http://www.ncbi.nlm.nih.gov/sites/entrez?cmd=retrieve&db=pubmed&list_uids=21177974&dopt=DocSum	http://www.modencode.org/White.shtml	21177974(MI:0225(ChIP-chip) and ChIP-seq)	null	modENCODE-24-JAN-11	http://www.modencode.org/White.shtml	2014-10-01	pd
FBgn0261434	FBgn0039749	hkb	CG11498	PDI: Transcription factor-Gene	-0.0486	-	CG11498	hkb	21177974	http://www.ncbi.nlm.nih.gov/sites/entrez?cmd=retrieve&db=pubmed&list_uids=21177974&dopt=DocSum	http://www.modencode.org/White.shtml	21177974(MI:0225(ChIP-chip) and ChIP-seq)	null	modENCODE-24-JAN-11	http://www.modencode.org/White.shtml	2014-10-01	pd
FBgn0261434	FBgn0011706	hkb	rpr	PDI: Transcription factor-Gene	0.2875	-	rpr	hkb	21177974	http://www.ncbi.nlm.nih.gov/sites/entrez?cmd=retrieve&db=pubmed&list_uids=21177974&dopt=DocSum	http://www.modencode.org/White.shtml	21177974(MI:0225(ChIP-chip) and ChIP-seq)	null	modENCODE-24-JAN-11	http://www.modencode.org/White.shtml	2014-10-01	pd
FBgn0261434	FBgn0029524	hkb	CG3176	PDI: Transcription factor-Gene	0.0268	-	CG3176	hkb	21177974	http://www.ncbi.nlm.nih.gov/sites/entrez?cmd=retrieve&db=pubmed&list_uids=21177974&dopt=DocSum	http://www.modencode.org/White.shtml	21177974(MI:0225(ChIP-chip) and ChIP-seq)	null	modENCODE-24-JAN-11	http://www.modencode.org/White.shtml	2014-10-01	pd
FBgn0261434	FBgn0085284	hkb	Blos3	PDI: Transcription factor-Gene	0.3753	-	Blos3	hkb	21177974	http://www.ncbi.nlm.nih.gov/sites/entrez?cmd=retrieve&db=pubmed&list_uids=21177974&dopt=DocSum	http://www.modencode.org/White.shtml	21177974(MI:0225(ChIP-chip) and ChIP-seq)	null	modENCODE-24-JAN-11	http://www.modencode.org/White.shtml	2014-10-01	pd
FBgn0261434	FBgn0004907	hkb	14-3-3zeta	PDI: Transcription factor-Gene	0.2514	-	14-3-3Œ∂	hkb	21177974	http://www.ncbi.nlm.nih.gov/sites/entrez?cmd=retrieve&db=pubmed&list_uids=21177974&dopt=DocSum	http://www.modencode.org/White.shtml	21177974(MI:0225(ChIP-chip) and ChIP-seq)	null	modENCODE-24-JAN-11	http://www.modencode.org/White.shtml	2014-10-01	pd
FBgn0261434	FBgn0039741	hkb	CG7943	PDI: Transcription factor-Gene	0.0926	-	CG7943	hkb	21177974	http://www.ncbi.nlm.nih.gov/sites/entrez?cmd=retrieve&db=pubmed&list_uids=21177974&dopt=DocSum	http://www.modencode.org/White.shtml	21177974(MI:0225(ChIP-chip) and ChIP-seq)	null	modENCODE-24-JAN-11	http://www.modencode.org/White.shtml	2014-10-01	pd
FBgn0261434	FBgn0042630	hkb	Sox21b	PDI: Transcription factor-Gene	-0.0652	-	Sox21b	hkb	21177974	http://www.ncbi.nlm.nih.gov/sites/entrez?cmd=retrieve&db=pubmed&list_uids=21177974&dopt=DocSum	http://www.modencode.org/White.shtml	21177974(MI:0225(ChIP-chip) and ChIP-seq)	null	modENCODE-24-JAN-11	http://www.modencode.org/White.shtml	2014-10-01	pd
FBgn0261434	FBgn0034692	hkb	CG13502	PDI: Transcription factor-Gene	-0.0619	-	CG13502	hkb	21177974	http://www.ncbi.nlm.nih.gov/sites/entrez?cmd=retrieve&db=pubmed&list_uids=21177974&dopt=DocSum	http://www.modencode.org/White.shtml	21177974(MI:0225(ChIP-chip) and ChIP-seq)	null	modENCODE-24-JAN-11	http://www.modencode.org/White.shtml	2014-10-01	pd
FBgn0261434	FBgn0031575	hkb	Cep97	PDI: Transcription factor-Gene	-0.0326	-	Cep97	hkb	21177974	http://www.ncbi.nlm.nih.gov/sites/entrez?cmd=retrieve&db=pubmed&list_uids=21177974&dopt=DocSum	http://www.modencode.org/White.shtml	21177974(MI:0225(ChIP-chip) and ChIP-seq)	null	modENCODE-24-JAN-11	http://www.modencode.org/White.shtml	2014-10-01	pd
FBgn0261434	FBgn0041087	hkb	wun2	PDI: Transcription factor-Gene	0.5864	-	wun2	hkb	21177974	http://www.ncbi.nlm.nih.gov/sites/entrez?cmd=retrieve&db=pubmed&list_uids=21177974&dopt=DocSum	http://www.modencode.org/White.shtml	21177974(MI:0225(ChIP-chip) and ChIP-seq)	null	modENCODE-24-JAN-11	http://www.modencode.org/White.shtml	2014-10-01	pd
FBgn0261434	FBgn0031057	hkb	Ubqn	PDI: Transcription factor-Gene	0.3002	-	Ubqn	hkb	21177974	http://www.ncbi.nlm.nih.gov/sites/entrez?cmd=retrieve&db=pubmed&list_uids=21177974&dopt=DocSum	http://www.modencode.org/White.shtml	21177974(MI:0225(ChIP-chip) and ChIP-seq)	null	modENCODE-24-JAN-11	http://www.modencode.org/White.shtml	2014-10-01	pd
FBgn0261434	FBgn0023001	hkb	melt	PDI: Transcription factor-Gene	-0.0695	-	melt	hkb	21177974	http://www.ncbi.nlm.nih.gov/sites/entrez?cmd=retrieve&db=pubmed&list_uids=21177974&dopt=DocSum	http://www.modencode.org/White.shtml	21177974(MI:0225(ChIP-chip) and ChIP-seq)	null	modENCODE-24-JAN-11	http://www.modencode.org/White.shtml	2014-10-01	pd
FBgn0261434	FBgn0031975	hkb	Tg	PDI: Transcription factor-Gene	-0.2383	-	Tg	hkb	21177974	http://www.ncbi.nlm.nih.gov/sites/entrez?cmd=retrieve&db=pubmed&list_uids=21177974&dopt=DocSum	http://www.modencode.org/White.shtml	21177974(MI:0225(ChIP-chip) and ChIP-seq)	null	modENCODE-24-JAN-11	http://www.modencode.org/White.shtml	2014-10-01	pd
FBgn0261434	FBgn0028693	hkb	Rpn12	PDI: Transcription factor-Gene	0.2202	-	Rpn12	hkb	21177974	http://www.ncbi.nlm.nih.gov/sites/entrez?cmd=retrieve&db=pubmed&list_uids=21177974&dopt=DocSum	http://www.modencode.org/White.shtml	21177974(MI:0225(ChIP-chip) and ChIP-seq)	null	modENCODE-24-JAN-11	http://www.modencode.org/White.shtml	2014-10-01	pd
FBgn0261434	FBgn0028692	hkb	Rpn2	PDI: Transcription factor-Gene	-0.106	-	Rpn2	hkb	21177974	http://www.ncbi.nlm.nih.gov/sites/entrez?cmd=retrieve&db=pubmed&list_uids=21177974&dopt=DocSum	http://www.modencode.org/White.shtml	21177974(MI:0225(ChIP-chip) and ChIP-seq)	null	modENCODE-24-JAN-11	http://www.modencode.org/White.shtml	2014-10-01	pd
FBgn0261434	FBgn0003651	hkb	svp	PDI: Transcription factor-Gene	-0.1781	-	svp	hkb	21177974	http://www.ncbi.nlm.nih.gov/sites/entrez?cmd=retrieve&db=pubmed&list_uids=21177974&dopt=DocSum	http://www.modencode.org/White.shtml	21177974(MI:0225(ChIP-chip) and ChIP-seq)	null	modENCODE-24-JAN-11	http://www.modencode.org/White.shtml	2014-10-01	pd
FBgn0261434	FBgn0032421	hkb	crok	PDI: Transcription factor-Gene	0.2704	-	crok	hkb	21177974	http://www.ncbi.nlm.nih.gov/sites/entrez?cmd=retrieve&db=pubmed&list_uids=21177974&dopt=DocSum	http://www.modencode.org/White.shtml	21177974(MI:0225(ChIP-chip) and ChIP-seq)	null	modENCODE-24-JAN-11	http://www.modencode.org/White.shtml	2014-10-01	pd
FBgn0261434	FBgn0003866	hkb	tsh	PDI: Transcription factor-Gene	0.6683	-	tsh	hkb	21177974	http://www.ncbi.nlm.nih.gov/sites/entrez?cmd=retrieve&db=pubmed&list_uids=21177974&dopt=DocSum	http://www.modencode.org/White.shtml	21177974(MI:0225(ChIP-chip) and ChIP-seq)	null	modENCODE-24-JAN-11	http://www.modencode.org/White.shtml	2014-10-01	pd
FBgn0261434	FBgn0032216	hkb	Usp14	PDI: Transcription factor-Gene	-0.0774	-	Usp14	hkb	21177974	http://www.ncbi.nlm.nih.gov/sites/entrez?cmd=retrieve&db=pubmed&list_uids=21177974&dopt=DocSum	http://www.modencode.org/White.shtml	21177974(MI:0225(ChIP-chip) and ChIP-seq)	null	modENCODE-24-JAN-11	http://www.modencode.org/White.shtml	2014-10-01	pd
FBgn0261434	FBgn0000042	hkb	Act5C	PDI: Transcription factor-Gene	0.1077	-	Act5C	hkb	21177974	http://www.ncbi.nlm.nih.gov/sites/entrez?cmd=retrieve&db=pubmed&list_uids=21177974&dopt=DocSum	http://www.modencode.org/White.shtml	21177974(MI:0225(ChIP-chip) and ChIP-seq)	null	modENCODE-24-JAN-11	http://www.modencode.org/White.shtml	2014-10-01	pd
FBgn0261434	FBgn0032420	hkb	CG6583	PDI: Transcription factor-Gene	0.1084	-	CG6583	hkb	21177974	http://www.ncbi.nlm.nih.gov/sites/entrez?cmd=retrieve&db=pubmed&list_uids=21177974&dopt=DocSum	http://www.modencode.org/White.shtml	21177974(MI:0225(ChIP-chip) and ChIP-seq)	null	modENCODE-24-JAN-11	http://www.modencode.org/White.shtml	2014-10-01	pd
FBgn0261434	FBgn0000043	hkb	Act42A	PDI: Transcription factor-Gene	0.2063	-	Act42A	hkb	21177974	http://www.ncbi.nlm.nih.gov/sites/entrez?cmd=retrieve&db=pubmed&list_uids=21177974&dopt=DocSum	http://www.modencode.org/White.shtml	21177974(MI:0225(ChIP-chip) and ChIP-seq)	null	modENCODE-24-JAN-11	http://www.modencode.org/White.shtml	2014-10-01	pd
FBgn0261434	FBgn0031377	hkb	CG15356	PDI: Transcription factor-Gene	0.1805	-	CG15356	hkb	21177974	http://www.ncbi.nlm.nih.gov/sites/entrez?cmd=retrieve&db=pubmed&list_uids=21177974&dopt=DocSum	http://www.modencode.org/White.shtml	21177974(MI:0225(ChIP-chip) and ChIP-seq)	null	modENCODE-24-JAN-11	http://www.modencode.org/White.shtml	2014-10-01	pd
FBgn0261434	FBgn0022343	hkb	CG3760	PDI: Transcription factor-Gene	-0.1114	-	CG3760	hkb	21177974	http://www.ncbi.nlm.nih.gov/sites/entrez?cmd=retrieve&db=pubmed&list_uids=21177974&dopt=DocSum	http://www.modencode.org/White.shtml	21177974(MI:0225(ChIP-chip) and ChIP-seq)	null	modENCODE-24-JAN-11	http://www.modencode.org/White.shtml	2014-10-01	pd
FBgn0261434	FBgn0014011	hkb	Rac2	PDI: Transcription factor-Gene	0.0644	-	Rac2	hkb	21177974	http://www.ncbi.nlm.nih.gov/sites/entrez?cmd=retrieve&db=pubmed&list_uids=21177974&dopt=DocSum	http://www.modencode.org/White.shtml	21177974(MI:0225(ChIP-chip) and ChIP-seq)	null	modENCODE-24-JAN-11	http://www.modencode.org/White.shtml	2014-10-01	pd
FBgn0261434	FBgn0261854	hkb	aPKC	PDI: Transcription factor-Gene	0.1199	-	aPKC	hkb	21177974	http://www.ncbi.nlm.nih.gov/sites/entrez?cmd=retrieve&db=pubmed&list_uids=21177974&dopt=DocSum	http://www.modencode.org/White.shtml	21177974(MI:0225(ChIP-chip) and ChIP-seq)	null	modENCODE-24-JAN-11	http://www.modencode.org/White.shtml	2014-10-01	pd
FBgn0261434	FBgn0013347	hkb	TfIIA-S	PDI: Transcription factor-Gene	0.6917	-	TfIIA-S	hkb	21177974	http://www.ncbi.nlm.nih.gov/sites/entrez?cmd=retrieve&db=pubmed&list_uids=21177974&dopt=DocSum	http://www.modencode.org/White.shtml	21177974(MI:0225(ChIP-chip) and ChIP-seq)	null	modENCODE-24-JAN-11	http://www.modencode.org/White.shtml	2014-10-01	pd
FBgn0261434	FBgn0037690	hkb	Task7	PDI: Transcription factor-Gene	0.0991	-	Task7	hkb	21177974	http://www.ncbi.nlm.nih.gov/sites/entrez?cmd=retrieve&db=pubmed&list_uids=21177974&dopt=DocSum	http://www.modencode.org/White.shtml	21177974(MI:0225(ChIP-chip) and ChIP-seq)	null	modENCODE-24-JAN-11	http://www.modencode.org/White.shtml	2014-10-01	pd
FBgn0261434	FBgn0013343	hkb	Syx1A	PDI: Transcription factor-Gene	0.3747	-	Syx1A	hkb	21177974	http://www.ncbi.nlm.nih.gov/sites/entrez?cmd=retrieve&db=pubmed&list_uids=21177974&dopt=DocSum	http://www.modencode.org/White.shtml	21177974(MI:0225(ChIP-chip) and ChIP-seq)	null	modENCODE-24-JAN-11	http://www.modencode.org/White.shtml	2014-10-01	pd
FBgn0261434	FBgn0261873	hkb	sdt	PDI: Transcription factor-Gene	0.0608	-	sdt	hkb	21177974	http://www.ncbi.nlm.nih.gov/sites/entrez?cmd=retrieve&db=pubmed&list_uids=21177974&dopt=DocSum	http://www.modencode.org/White.shtml	21177974(MI:0225(ChIP-chip) and ChIP-seq)	null	modENCODE-24-JAN-11	http://www.modencode.org/White.shtml	2014-10-01	pd
FBgn0261434	FBgn0032405	hkb	firl	PDI: Transcription factor-Gene	-0.0771	-	CG14946	hkb	21177974	http://www.ncbi.nlm.nih.gov/sites/entrez?cmd=retrieve&db=pubmed&list_uids=21177974&dopt=DocSum	http://www.modencode.org/White.shtml	21177974(MI:0225(ChIP-chip) and ChIP-seq)	null	modENCODE-24-JAN-11	http://www.modencode.org/White.shtml	2014-10-01	pd
FBgn0261434	FBgn0011592	hkb	fra	PDI: Transcription factor-Gene	0.6227	-	fra	hkb	21177974	http://www.ncbi.nlm.nih.gov/sites/entrez?cmd=retrieve&db=pubmed&list_uids=21177974&dopt=DocSum	http://www.modencode.org/White.shtml	21177974(MI:0225(ChIP-chip) and ChIP-seq)	null	modENCODE-24-JAN-11	http://www.modencode.org/White.shtml	2014-10-01	pd
FBgn0261434	FBgn0032409	hkb	Ced-12	PDI: Transcription factor-Gene	0.6893	-	Ced-12	hkb	21177974	http://www.ncbi.nlm.nih.gov/sites/entrez?cmd=retrieve&db=pubmed&list_uids=21177974&dopt=DocSum	http://www.modencode.org/White.shtml	21177974(MI:0225(ChIP-chip) and ChIP-seq)	null	modENCODE-24-JAN-11	http://www.modencode.org/White.shtml	2014-10-01	pd
FBgn0261434	FBgn0028662	hkb	VhaPPA1-1	PDI: Transcription factor-Gene	-0.2621	-	VhaPPA1-1	hkb	21177974	http://www.ncbi.nlm.nih.gov/sites/entrez?cmd=retrieve&db=pubmed&list_uids=21177974&dopt=DocSum	http://www.modencode.org/White.shtml	21177974(MI:0225(ChIP-chip) and ChIP-seq)	null	modENCODE-24-JAN-11	http://www.modencode.org/White.shtml	2014-10-01	pd
FBgn0261434	FBgn0028527	hkb	CG18507	PDI: Transcription factor-Gene	-0.2533	-	CG18507	hkb	21177974	http://www.ncbi.nlm.nih.gov/sites/entrez?cmd=retrieve&db=pubmed&list_uids=21177974&dopt=DocSum	http://www.modencode.org/White.shtml	21177974(MI:0225(ChIP-chip) and ChIP-seq)	null	modENCODE-24-JAN-11	http://www.modencode.org/White.shtml	2014-10-01	pd
FBgn0261434	FBgn0031047	hkb	Rcd-1	PDI: Transcription factor-Gene	0.711	-	Rcd-1	hkb	21177974	http://www.ncbi.nlm.nih.gov/sites/entrez?cmd=retrieve&db=pubmed&list_uids=21177974&dopt=DocSum	http://www.modencode.org/White.shtml	21177974(MI:0225(ChIP-chip) and ChIP-seq)	null	modENCODE-24-JAN-11	http://www.modencode.org/White.shtml	2014-10-01	pd
FBgn0261434	FBgn0051365	hkb	CG31365	PDI: Transcription factor-Gene	0.6681	-	CG31365	hkb	21177974	http://www.ncbi.nlm.nih.gov/sites/entrez?cmd=retrieve&db=pubmed&list_uids=21177974&dopt=DocSum	http://www.modencode.org/White.shtml	21177974(MI:0225(ChIP-chip) and ChIP-seq)	null	modENCODE-24-JAN-11	http://www.modencode.org/White.shtml	2014-10-01	pd
FBgn0261434	FBgn0037899	hkb	RpL24-like	PDI: Transcription factor-Gene	0.4141	-	RpL24-like	hkb	21177974	http://www.ncbi.nlm.nih.gov/sites/entrez?cmd=retrieve&db=pubmed&list_uids=21177974&dopt=DocSum	http://www.modencode.org/White.shtml	21177974(MI:0225(ChIP-chip) and ChIP-seq)	null	modENCODE-24-JAN-11	http://www.modencode.org/White.shtml	2014-10-01	pd
FBgn0261434	FBgn0030699	hkb	CG8578	PDI: Transcription factor-Gene	0.3827	-	CG8578	hkb	21177974	http://www.ncbi.nlm.nih.gov/sites/entrez?cmd=retrieve&db=pubmed&list_uids=21177974&dopt=DocSum	http://www.modencode.org/White.shtml	21177974(MI:0225(ChIP-chip) and ChIP-seq)	null	modENCODE-24-JAN-11	http://www.modencode.org/White.shtml	2014-10-01	pd
FBgn0261434	FBgn0011725	hkb	twin	PDI: Transcription factor-Gene	-0.06	-	twin	hkb	21177974	http://www.ncbi.nlm.nih.gov/sites/entrez?cmd=retrieve&db=pubmed&list_uids=21177974&dopt=DocSum	http://www.modencode.org/White.shtml	21177974(MI:0225(ChIP-chip) and ChIP-seq)	null	modENCODE-24-JAN-11	http://www.modencode.org/White.shtml	2014-10-01	pd
FBgn0261434	FBgn0015286	hkb	Rala	PDI: Transcription factor-Gene	0.1082	-	Rala	hkb	21177974	http://www.ncbi.nlm.nih.gov/sites/entrez?cmd=retrieve&db=pubmed&list_uids=21177974&dopt=DocSum	http://www.modencode.org/White.shtml	21177974(MI:0225(ChIP-chip) and ChIP-seq)	null	modENCODE-24-JAN-11	http://www.modencode.org/White.shtml	2014-10-01	pd
FBgn0261434	FBgn0003870	hkb	ttk	PDI: Transcription factor-Gene	0.3571	-	ttk	hkb	21177974	http://www.ncbi.nlm.nih.gov/sites/entrez?cmd=retrieve&db=pubmed&list_uids=21177974&dopt=DocSum	http://www.modencode.org/White.shtml	21177974(MI:0225(ChIP-chip) and ChIP-seq)	null	modENCODE-24-JAN-11	http://www.modencode.org/White.shtml	2014-10-01	pd
FBgn0261434	FBgn0051163	hkb	SKIP	PDI: Transcription factor-Gene	0.7876	-	SKIP	hkb	21177974	http://www.ncbi.nlm.nih.gov/sites/entrez?cmd=retrieve&db=pubmed&list_uids=21177974&dopt=DocSum	http://www.modencode.org/White.shtml	21177974(MI:0225(ChIP-chip) and ChIP-seq)	null	modENCODE-24-JAN-11	http://www.modencode.org/White.shtml	2014-10-01	pd
FBgn0261434	FBgn0011742	hkb	Arp2	PDI: Transcription factor-Gene	0.1184	-	Arp2	hkb	21177974	http://www.ncbi.nlm.nih.gov/sites/entrez?cmd=retrieve&db=pubmed&list_uids=21177974&dopt=DocSum	http://www.modencode.org/White.shtml	21177974(MI:0225(ChIP-chip) and ChIP-seq)	null	modENCODE-24-JAN-11	http://www.modencode.org/White.shtml	2014-10-01	pd
FBgn0261434	FBgn0026402	hkb	NiPp1	PDI: Transcription factor-Gene	0.5908	-	NiPp1	hkb	21177974	http://www.ncbi.nlm.nih.gov/sites/entrez?cmd=retrieve&db=pubmed&list_uids=21177974&dopt=DocSum	http://www.modencode.org/White.shtml	21177974(MI:0225(ChIP-chip) and ChIP-seq)	null	modENCODE-24-JAN-11	http://www.modencode.org/White.shtml	2014-10-01	pd
FBgn0261434	FBgn0032200	hkb	CG5676	PDI: Transcription factor-Gene	0.479	-	CG5676	hkb	21177974	http://www.ncbi.nlm.nih.gov/sites/entrez?cmd=retrieve&db=pubmed&list_uids=21177974&dopt=DocSum	http://www.modencode.org/White.shtml	21177974(MI:0225(ChIP-chip) and ChIP-seq)	null	modENCODE-24-JAN-11	http://www.modencode.org/White.shtml	2014-10-01	pd
FBgn0261434	FBgn0011740	hkb	alpha-Man-IIa	PDI: Transcription factor-Gene	0.1693	-	Œ±-Man-IIa	hkb	21177974	http://www.ncbi.nlm.nih.gov/sites/entrez?cmd=retrieve&db=pubmed&list_uids=21177974&dopt=DocSum	http://www.modencode.org/White.shtml	21177974(MI:0225(ChIP-chip) and ChIP-seq)	null	modENCODE-24-JAN-11	http://www.modencode.org/White.shtml	2014-10-01	pd
FBgn0261434	FBgn0022740	hkb	HLH54F	PDI: Transcription factor-Gene	0.4702	-	HLH54F	hkb	21177974	http://www.ncbi.nlm.nih.gov/sites/entrez?cmd=retrieve&db=pubmed&list_uids=21177974&dopt=DocSum	http://www.modencode.org/White.shtml	21177974(MI:0225(ChIP-chip) and ChIP-seq)	null	modENCODE-24-JAN-11	http://www.modencode.org/White.shtml	2014-10-01	pd
FBgn0261434	FBgn0039712	hkb	CG15514	PDI: Transcription factor-Gene	0.6251	-	CG15514	hkb	21177974	http://www.ncbi.nlm.nih.gov/sites/entrez?cmd=retrieve&db=pubmed&list_uids=21177974&dopt=DocSum	http://www.modencode.org/White.shtml	21177974(MI:0225(ChIP-chip) and ChIP-seq)	null	modENCODE-24-JAN-11	http://www.modencode.org/White.shtml	2014-10-01	pd
FBgn0261434	FBgn0039713	hkb	RpS8	PDI: Transcription factor-Gene	-0.2739	-	RpS8	hkb	21177974	http://www.ncbi.nlm.nih.gov/sites/entrez?cmd=retrieve&db=pubmed&list_uids=21177974&dopt=DocSum	http://www.modencode.org/White.shtml	21177974(MI:0225(ChIP-chip) and ChIP-seq)	null	modENCODE-24-JAN-11	http://www.modencode.org/White.shtml	2014-10-01	pd
FBgn0261434	FBgn0003884	hkb	alphaTub84B	PDI: Transcription factor-Gene	0.4176	-	Œ±Tub84B	hkb	21177974	http://www.ncbi.nlm.nih.gov/sites/entrez?cmd=retrieve&db=pubmed&list_uids=21177974&dopt=DocSum	http://www.modencode.org/White.shtml	21177974(MI:0225(ChIP-chip) and ChIP-seq)	null	modENCODE-24-JAN-11	http://www.modencode.org/White.shtml	2014-10-01	pd
FBgn0261434	FBgn0000394	hkb	cv	PDI: Transcription factor-Gene	0.1846	-	cv	hkb	21177974	http://www.ncbi.nlm.nih.gov/sites/entrez?cmd=retrieve&db=pubmed&list_uids=21177974&dopt=DocSum	http://www.modencode.org/White.shtml	21177974(MI:0225(ChIP-chip) and ChIP-seq)	null	modENCODE-24-JAN-11	http://www.modencode.org/White.shtml	2014-10-01	pd
FBgn0261434	FBgn0015278	hkb	Pi3K68D	PDI: Transcription factor-Gene	0.3105	-	Pi3K68D	hkb	21177974	http://www.ncbi.nlm.nih.gov/sites/entrez?cmd=retrieve&db=pubmed&list_uids=21177974&dopt=DocSum	http://www.modencode.org/White.shtml	21177974(MI:0225(ChIP-chip) and ChIP-seq)	null	modENCODE-24-JAN-11	http://www.modencode.org/White.shtml	2014-10-01	pd
FBgn0261434	FBgn0034660	hkb	Loxl2	PDI: Transcription factor-Gene	-0.1296	-	lox2	hkb	21177974	http://www.ncbi.nlm.nih.gov/sites/entrez?cmd=retrieve&db=pubmed&list_uids=21177974&dopt=DocSum	http://www.modencode.org/White.shtml	21177974(MI:0225(ChIP-chip) and ChIP-seq)	null	modENCODE-24-JAN-11	http://www.modencode.org/White.shtml	2014-10-01	pd
FBgn0261434	FBgn0031351	hkb	CG14352	PDI: Transcription factor-Gene	0.2939	-	CG14352	hkb	21177974	http://www.ncbi.nlm.nih.gov/sites/entrez?cmd=retrieve&db=pubmed&list_uids=21177974&dopt=DocSum	http://www.modencode.org/White.shtml	21177974(MI:0225(ChIP-chip) and ChIP-seq)	null	modENCODE-24-JAN-11	http://www.modencode.org/White.shtml	2014-10-01	pd
FBgn0261434	FBgn0010877	hkb	l(3)05822	PDI: Transcription factor-Gene	0.4015	-	l(3)05822	hkb	21177974	http://www.ncbi.nlm.nih.gov/sites/entrez?cmd=retrieve&db=pubmed&list_uids=21177974&dopt=DocSum	http://www.modencode.org/White.shtml	21177974(MI:0225(ChIP-chip) and ChIP-seq)	null	modENCODE-24-JAN-11	http://www.modencode.org/White.shtml	2014-10-01	pd
FBgn0261434	FBgn0003892	hkb	ptc	PDI: Transcription factor-Gene	0.6153	-	ptc	hkb	21177974	http://www.ncbi.nlm.nih.gov/sites/entrez?cmd=retrieve&db=pubmed&list_uids=21177974&dopt=DocSum	http://www.modencode.org/White.shtml	21177974(MI:0225(ChIP-chip) and ChIP-seq)	null	modENCODE-24-JAN-11	http://www.modencode.org/White.shtml	2014-10-01	pd
FBgn0261434	FBgn0000014	hkb	abd-A	PDI: Transcription factor-Gene	0.3326	-	abd-A	hkb	21177974	http://www.ncbi.nlm.nih.gov/sites/entrez?cmd=retrieve&db=pubmed&list_uids=21177974&dopt=DocSum	http://www.modencode.org/White.shtml	21177974(MI:0225(ChIP-chip) and ChIP-seq)	null	modENCODE-24-JAN-11	http://www.modencode.org/White.shtml	2014-10-01	pd
FBgn0261434	FBgn0000015	hkb	Abd-B	PDI: Transcription factor-Gene	0.5183	-	Abd-B	hkb	21177974	http://www.ncbi.nlm.nih.gov/sites/entrez?cmd=retrieve&db=pubmed&list_uids=21177974&dopt=DocSum	http://www.modencode.org/White.shtml	21177974(MI:0225(ChIP-chip) and ChIP-seq)	null	modENCODE-24-JAN-11	http://www.modencode.org/White.shtml	2014-10-01	pd
FBgn0261434	FBgn0051125	hkb	CG31125	PDI: Transcription factor-Gene	0.7929	-	CG31125	hkb	21177974	http://www.ncbi.nlm.nih.gov/sites/entrez?cmd=retrieve&db=pubmed&list_uids=21177974&dopt=DocSum	http://www.modencode.org/White.shtml	21177974(MI:0225(ChIP-chip) and ChIP-seq)	null	modENCODE-24-JAN-11	http://www.modencode.org/White.shtml	2014-10-01	pd
FBgn0261434	FBgn0037875	hkb	ZnT86D	PDI: Transcription factor-Gene	-0.08	-	ZnT86D	hkb	21177974	http://www.ncbi.nlm.nih.gov/sites/entrez?cmd=retrieve&db=pubmed&list_uids=21177974&dopt=DocSum	http://www.modencode.org/White.shtml	21177974(MI:0225(ChIP-chip) and ChIP-seq)	null	modENCODE-24-JAN-11	http://www.modencode.org/White.shtml	2014-10-01	pd
FBgn0261434	FBgn0243511	hkb	psidin	PDI: Transcription factor-Gene	-0.0593	-	psidin	hkb	21177974	http://www.ncbi.nlm.nih.gov/sites/entrez?cmd=retrieve&db=pubmed&list_uids=21177974&dopt=DocSum	http://www.modencode.org/White.shtml	21177974(MI:0225(ChIP-chip) and ChIP-seq)	null	modENCODE-24-JAN-11	http://www.modencode.org/White.shtml	2014-10-01	pd
FBgn0261434	FBgn0039704	hkb	neo	PDI: Transcription factor-Gene	-0.0706	-	neo	hkb	21177974	http://www.ncbi.nlm.nih.gov/sites/entrez?cmd=retrieve&db=pubmed&list_uids=21177974&dopt=DocSum	http://www.modencode.org/White.shtml	21177974(MI:0225(ChIP-chip) and ChIP-seq)	null	modENCODE-24-JAN-11	http://www.modencode.org/White.shtml	2014-10-01	pd
FBgn0261434	FBgn0043070	hkb	MESK2	PDI: Transcription factor-Gene	-0.4945	-	MESK2	hkb	21177974	http://www.ncbi.nlm.nih.gov/sites/entrez?cmd=retrieve&db=pubmed&list_uids=21177974&dopt=DocSum	http://www.modencode.org/White.shtml	21177974(MI:0225(ChIP-chip) and ChIP-seq)	null	modENCODE-24-JAN-11	http://www.modencode.org/White.shtml	2014-10-01	pd
FBgn0261434	FBgn0033520	hkb	Prx2540-1	PDI: Transcription factor-Gene	0.3148	-	Prx2540-1	hkb	21177974	http://www.ncbi.nlm.nih.gov/sites/entrez?cmd=retrieve&db=pubmed&list_uids=21177974&dopt=DocSum	http://www.modencode.org/White.shtml	21177974(MI:0225(ChIP-chip) and ChIP-seq)	null	modENCODE-24-JAN-11	http://www.modencode.org/White.shtml	2014-10-01	pd
FBgn0261434	FBgn0030679	hkb	CG8206	PDI: Transcription factor-Gene	-0.4245	-	CG8206	hkb	21177974	http://www.ncbi.nlm.nih.gov/sites/entrez?cmd=retrieve&db=pubmed&list_uids=21177974&dopt=DocSum	http://www.modencode.org/White.shtml	21177974(MI:0225(ChIP-chip) and ChIP-seq)	null	modENCODE-24-JAN-11	http://www.modencode.org/White.shtml	2014-10-01	pd
FBgn0261434	FBgn0036349	hkb	SNCF	PDI: Transcription factor-Gene	0.589	-	SNCF	hkb	21177974	http://www.ncbi.nlm.nih.gov/sites/entrez?cmd=retrieve&db=pubmed&list_uids=21177974&dopt=DocSum	http://www.modencode.org/White.shtml	21177974(MI:0225(ChIP-chip) and ChIP-seq)	null	modENCODE-24-JAN-11	http://www.modencode.org/White.shtml	2014-10-01	pd
FBgn0261434	FBgn0030678	hkb	CG11679	PDI: Transcription factor-Gene	0.0604	-	CG11679	hkb	21177974	http://www.ncbi.nlm.nih.gov/sites/entrez?cmd=retrieve&db=pubmed&list_uids=21177974&dopt=DocSum	http://www.modencode.org/White.shtml	21177974(MI:0225(ChIP-chip) and ChIP-seq)	null	modENCODE-24-JAN-11	http://www.modencode.org/White.shtml	2014-10-01	pd
FBgn0261434	FBgn0024957	hkb	Irp-1B	PDI: Transcription factor-Gene	-0.3804	-	Irp-1B	hkb	21177974	http://www.ncbi.nlm.nih.gov/sites/entrez?cmd=retrieve&db=pubmed&list_uids=21177974&dopt=DocSum	http://www.modencode.org/White.shtml	21177974(MI:0225(ChIP-chip) and ChIP-seq)	null	modENCODE-24-JAN-11	http://www.modencode.org/White.shtml	2014-10-01	pd
FBgn0261434	FBgn0037878	hkb	CG6693	PDI: Transcription factor-Gene	0.7271	-	CG6693	hkb	21177974	http://www.ncbi.nlm.nih.gov/sites/entrez?cmd=retrieve&db=pubmed&list_uids=21177974&dopt=DocSum	http://www.modencode.org/White.shtml	21177974(MI:0225(ChIP-chip) and ChIP-seq)	null	modENCODE-24-JAN-11	http://www.modencode.org/White.shtml	2014-10-01	pd
FBgn0261434	FBgn0030676	hkb	CG12379	PDI: Transcription factor-Gene	0.5324	-	CG12379	hkb	21177974	http://www.ncbi.nlm.nih.gov/sites/entrez?cmd=retrieve&db=pubmed&list_uids=21177974&dopt=DocSum	http://www.modencode.org/White.shtml	21177974(MI:0225(ChIP-chip) and ChIP-seq)	null	modENCODE-24-JAN-11	http://www.modencode.org/White.shtml	2014-10-01	pd
FBgn0261434	FBgn0037877	hkb	CG6689	PDI: Transcription factor-Gene	0.4351	-	CG6689	hkb	21177974	http://www.ncbi.nlm.nih.gov/sites/entrez?cmd=retrieve&db=pubmed&list_uids=21177974&dopt=DocSum	http://www.modencode.org/White.shtml	21177974(MI:0225(ChIP-chip) and ChIP-seq)	null	modENCODE-24-JAN-11	http://www.modencode.org/White.shtml	2014-10-01	pd
FBgn0261434	FBgn0030685	hkb	Graf	PDI: Transcription factor-Gene	-0.048	-	Graf	hkb	21177974	http://www.ncbi.nlm.nih.gov/sites/entrez?cmd=retrieve&db=pubmed&list_uids=21177974&dopt=DocSum	http://www.modencode.org/White.shtml	21177974(MI:0225(ChIP-chip) and ChIP-seq)	null	modENCODE-24-JAN-11	http://www.modencode.org/White.shtml	2014-10-01	pd
FBgn0261434	FBgn0030686	hkb	mRpL3	PDI: Transcription factor-Gene	-0.0028	-	mRpL3	hkb	21177974	http://www.ncbi.nlm.nih.gov/sites/entrez?cmd=retrieve&db=pubmed&list_uids=21177974&dopt=DocSum	http://www.modencode.org/White.shtml	21177974(MI:0225(ChIP-chip) and ChIP-seq)	null	modENCODE-24-JAN-11	http://www.modencode.org/White.shtml	2014-10-01	pd
FBgn0261434	FBgn0037074	hkb	CG7324	PDI: Transcription factor-Gene	0.1345	-	CG7324	hkb	21177974	http://www.ncbi.nlm.nih.gov/sites/entrez?cmd=retrieve&db=pubmed&list_uids=21177974&dopt=DocSum	http://www.modencode.org/White.shtml	21177974(MI:0225(ChIP-chip) and ChIP-seq)	null	modENCODE-24-JAN-11	http://www.modencode.org/White.shtml	2014-10-01	pd
FBgn0261434	FBgn0010417	hkb	Taf6	PDI: Transcription factor-Gene	0.7623	-	Taf6	hkb	21177974	http://www.ncbi.nlm.nih.gov/sites/entrez?cmd=retrieve&db=pubmed&list_uids=21177974&dopt=DocSum	http://www.modencode.org/White.shtml	21177974(MI:0225(ChIP-chip) and ChIP-seq)	null	modENCODE-24-JAN-11	http://www.modencode.org/White.shtml	2014-10-01	pd
FBgn0261434	FBgn0027598	hkb	cindr	PDI: Transcription factor-Gene	0.108	-	cindr	hkb	21177974	http://www.ncbi.nlm.nih.gov/sites/entrez?cmd=retrieve&db=pubmed&list_uids=21177974&dopt=DocSum	http://www.modencode.org/White.shtml	21177974(MI:0225(ChIP-chip) and ChIP-seq)	null	modENCODE-24-JAN-11	http://www.modencode.org/White.shtml	2014-10-01	pd
FBgn0261434	FBgn0010620	hkb	CG10939	PDI: Transcription factor-Gene	-0.3156	-	CG10939	hkb	21177974	http://www.ncbi.nlm.nih.gov/sites/entrez?cmd=retrieve&db=pubmed&list_uids=21177974&dopt=DocSum	http://www.modencode.org/White.shtml	21177974(MI:0225(ChIP-chip) and ChIP-seq)	null	modENCODE-24-JAN-11	http://www.modencode.org/White.shtml	2014-10-01	pd
FBgn0261434	FBgn0053207	hkb	pxb	PDI: Transcription factor-Gene	0.8019	-	pxb	hkb	21177974	http://www.ncbi.nlm.nih.gov/sites/entrez?cmd=retrieve&db=pubmed&list_uids=21177974&dopt=DocSum	http://www.modencode.org/White.shtml	21177974(MI:0225(ChIP-chip) and ChIP-seq)	null	modENCODE-24-JAN-11	http://www.modencode.org/White.shtml	2014-10-01	pd
FBgn0261434	FBgn0010621	hkb	CCT5	PDI: Transcription factor-Gene	-0.0463	-	Cct5	hkb	21177974	http://www.ncbi.nlm.nih.gov/sites/entrez?cmd=retrieve&db=pubmed&list_uids=21177974&dopt=DocSum	http://www.modencode.org/White.shtml	21177974(MI:0225(ChIP-chip) and ChIP-seq)	null	modENCODE-24-JAN-11	http://www.modencode.org/White.shtml	2014-10-01	pd
FBgn0261434	FBgn0262582	hkb	cic	PDI: Transcription factor-Gene	0.3696	-	cic	hkb	21177974	http://www.ncbi.nlm.nih.gov/sites/entrez?cmd=retrieve&db=pubmed&list_uids=21177974&dopt=DocSum	http://www.modencode.org/White.shtml	21177974(MI:0225(ChIP-chip) and ChIP-seq)	null	modENCODE-24-JAN-11	http://www.modencode.org/White.shtml	2014-10-01	pd
FBgn0261434	FBgn0085444	hkb	mute	PDI: Transcription factor-Gene	0.4955	-	mute	hkb	21177974	http://www.ncbi.nlm.nih.gov/sites/entrez?cmd=retrieve&db=pubmed&list_uids=21177974&dopt=DocSum	http://www.modencode.org/White.shtml	21177974(MI:0225(ChIP-chip) and ChIP-seq)	null	modENCODE-24-JAN-11	http://www.modencode.org/White.shtml	2014-10-01	pd
FBgn0261434	FBgn0000562	hkb	egl	PDI: Transcription factor-Gene	-0.2681	-	egl	hkb	21177974	http://www.ncbi.nlm.nih.gov/sites/entrez?cmd=retrieve&db=pubmed&list_uids=21177974&dopt=DocSum	http://www.modencode.org/White.shtml	21177974(MI:0225(ChIP-chip) and ChIP-seq)	null	modENCODE-24-JAN-11	http://www.modencode.org/White.shtml	2014-10-01	pd
FBgn0261434	FBgn0010812	hkb	unc-45	PDI: Transcription factor-Gene	-0.1588	-	unc-45	hkb	21177974	http://www.ncbi.nlm.nih.gov/sites/entrez?cmd=retrieve&db=pubmed&list_uids=21177974&dopt=DocSum	http://www.modencode.org/White.shtml	21177974(MI:0225(ChIP-chip) and ChIP-seq)	null	modENCODE-24-JAN-11	http://www.modencode.org/White.shtml	2014-10-01	pd
FBgn0261434	FBgn0036350	hkb	CG14111	PDI: Transcription factor-Gene	-0.018	-	CG14111	hkb	21177974	http://www.ncbi.nlm.nih.gov/sites/entrez?cmd=retrieve&db=pubmed&list_uids=21177974&dopt=DocSum	http://www.modencode.org/White.shtml	21177974(MI:0225(ChIP-chip) and ChIP-seq)	null	modENCODE-24-JAN-11	http://www.modencode.org/White.shtml	2014-10-01	pd
FBgn0261434	FBgn0085423	hkb	GramD1B	PDI: Transcription factor-Gene	-0.0175	-	CG34394	hkb	21177974	http://www.ncbi.nlm.nih.gov/sites/entrez?cmd=retrieve&db=pubmed&list_uids=21177974&dopt=DocSum	http://www.modencode.org/White.shtml	21177974(MI:0225(ChIP-chip) and ChIP-seq)	null	modENCODE-24-JAN-11	http://www.modencode.org/White.shtml	2014-10-01	pd
FBgn0261434	FBgn0017551	hkb	Rca1	PDI: Transcription factor-Gene	0.5144	-	Rca1	hkb	21177974	http://www.ncbi.nlm.nih.gov/sites/entrez?cmd=retrieve&db=pubmed&list_uids=21177974&dopt=DocSum	http://www.modencode.org/White.shtml	21177974(MI:0225(ChIP-chip) and ChIP-seq)	null	modENCODE-24-JAN-11	http://www.modencode.org/White.shtml	2014-10-01	pd
FBgn0261434	FBgn0017550	hkb	Rga	PDI: Transcription factor-Gene	0.6301	-	Rga	hkb	21177974	http://www.ncbi.nlm.nih.gov/sites/entrez?cmd=retrieve&db=pubmed&list_uids=21177974&dopt=DocSum	http://www.modencode.org/White.shtml	21177974(MI:0225(ChIP-chip) and ChIP-seq)	null	modENCODE-24-JAN-11	http://www.modencode.org/White.shtml	2014-10-01	pd
FBgn0261434	FBgn0050001	hkb	CG30001	PDI: Transcription factor-Gene	0.6778	-	CG30001	hkb	21177974	http://www.ncbi.nlm.nih.gov/sites/entrez?cmd=retrieve&db=pubmed&list_uids=21177974&dopt=DocSum	http://www.modencode.org/White.shtml	21177974(MI:0225(ChIP-chip) and ChIP-seq)	null	modENCODE-24-JAN-11	http://www.modencode.org/White.shtml	2014-10-01	pd
FBgn0261434	FBgn0035772	hkb	Sh3beta	PDI: Transcription factor-Gene	-0.0287	-	Sh3Œ≤	hkb	21177974	http://www.ncbi.nlm.nih.gov/sites/entrez?cmd=retrieve&db=pubmed&list_uids=21177974&dopt=DocSum	http://www.modencode.org/White.shtml	21177974(MI:0225(ChIP-chip) and ChIP-seq)	null	modENCODE-24-JAN-11	http://www.modencode.org/White.shtml	2014-10-01	pd
FBgn0261434	FBgn0037282	hkb	CG14657	PDI: Transcription factor-Gene	0.6049	-	CG14657	hkb	21177974	http://www.ncbi.nlm.nih.gov/sites/entrez?cmd=retrieve&db=pubmed&list_uids=21177974&dopt=DocSum	http://www.modencode.org/White.shtml	21177974(MI:0225(ChIP-chip) and ChIP-seq)	null	modENCODE-24-JAN-11	http://www.modencode.org/White.shtml	2014-10-01	pd
FBgn0261434	FBgn0030904	hkb	upd2	PDI: Transcription factor-Gene	0.8316	-	upd2	hkb	21177974	http://www.ncbi.nlm.nih.gov/sites/entrez?cmd=retrieve&db=pubmed&list_uids=21177974&dopt=DocSum	http://www.modencode.org/White.shtml	21177974(MI:0225(ChIP-chip) and ChIP-seq)	null	modENCODE-24-JAN-11	http://www.modencode.org/White.shtml	2014-10-01	pd
FBgn0261434	FBgn0010433	hkb	ato	PDI: Transcription factor-Gene	0.7346	-	ato	hkb	21177974	http://www.ncbi.nlm.nih.gov/sites/entrez?cmd=retrieve&db=pubmed&list_uids=21177974&dopt=DocSum	http://www.modencode.org/White.shtml	21177974(MI:0225(ChIP-chip) and ChIP-seq)	null	modENCODE-24-JAN-11	http://www.modencode.org/White.shtml	2014-10-01	pd
FBgn0261434	FBgn0030694	hkb	CG15602	PDI: Transcription factor-Gene	-0.2075	-	CG15602	hkb	21177974	http://www.ncbi.nlm.nih.gov/sites/entrez?cmd=retrieve&db=pubmed&list_uids=21177974&dopt=DocSum	http://www.modencode.org/White.shtml	21177974(MI:0225(ChIP-chip) and ChIP-seq)	null	modENCODE-24-JAN-11	http://www.modencode.org/White.shtml	2014-10-01	pd
FBgn0261434	FBgn0037603	hkb	CG11753	PDI: Transcription factor-Gene	-0.0836	-	CG11753	hkb	21177974	http://www.ncbi.nlm.nih.gov/sites/entrez?cmd=retrieve&db=pubmed&list_uids=21177974&dopt=DocSum	http://www.modencode.org/White.shtml	21177974(MI:0225(ChIP-chip) and ChIP-seq)	null	modENCODE-24-JAN-11	http://www.modencode.org/White.shtml	2014-10-01	pd
FBgn0261434	FBgn0010051	hkb	Itp-r83A	PDI: Transcription factor-Gene	-0.2341	-	Itp-r83A	hkb	21177974	http://www.ncbi.nlm.nih.gov/sites/entrez?cmd=retrieve&db=pubmed&list_uids=21177974&dopt=DocSum	http://www.modencode.org/White.shtml	21177974(MI:0225(ChIP-chip) and ChIP-seq)	null	modENCODE-24-JAN-11	http://www.modencode.org/White.shtml	2014-10-01	pd
FBgn0261434	FBgn0025336	hkb	CG4882	PDI: Transcription factor-Gene	0.2246	-	CG4882	hkb	21177974	http://www.ncbi.nlm.nih.gov/sites/entrez?cmd=retrieve&db=pubmed&list_uids=21177974&dopt=DocSum	http://www.modencode.org/White.shtml	21177974(MI:0225(ChIP-chip) and ChIP-seq)	null	modENCODE-24-JAN-11	http://www.modencode.org/White.shtml	2014-10-01	pd
FBgn0261434	FBgn0263832	hkb	Rcd5	PDI: Transcription factor-Gene	0.5829	-	Rcd5	hkb	21177974	http://www.ncbi.nlm.nih.gov/sites/entrez?cmd=retrieve&db=pubmed&list_uids=21177974&dopt=DocSum	http://www.modencode.org/White.shtml	21177974(MI:0225(ChIP-chip) and ChIP-seq)	null	modENCODE-24-JAN-11	http://www.modencode.org/White.shtml	2014-10-01	pd
FBgn0261434	FBgn0025335	hkb	CG4585	PDI: Transcription factor-Gene	-0.3026	-	CG4585	hkb	21177974	http://www.ncbi.nlm.nih.gov/sites/entrez?cmd=retrieve&db=pubmed&list_uids=21177974&dopt=DocSum	http://www.modencode.org/White.shtml	21177974(MI:0225(ChIP-chip) and ChIP-seq)	null	modENCODE-24-JAN-11	http://www.modencode.org/White.shtml	2014-10-01	pd
FBgn0261434	FBgn0030693	hkb	CG8974	PDI: Transcription factor-Gene	-0.2441	-	CG8974	hkb	21177974	http://www.ncbi.nlm.nih.gov/sites/entrez?cmd=retrieve&db=pubmed&list_uids=21177974&dopt=DocSum	http://www.modencode.org/White.shtml	21177974(MI:0225(ChIP-chip) and ChIP-seq)	null	modENCODE-24-JAN-11	http://www.modencode.org/White.shtml	2014-10-01	pd
FBgn0261434	FBgn0263251	hkb	vnc	PDI: Transcription factor-Gene	0.0583	-	vnc	hkb	21177974	http://www.ncbi.nlm.nih.gov/sites/entrez?cmd=retrieve&db=pubmed&list_uids=21177974&dopt=DocSum	http://www.modencode.org/White.shtml	21177974(MI:0225(ChIP-chip) and ChIP-seq)	null	modENCODE-24-JAN-11	http://www.modencode.org/White.shtml	2014-10-01	pd
FBgn0261434	FBgn0000578	hkb	ena	PDI: Transcription factor-Gene	0.7733	-	ena	hkb	21177974	http://www.ncbi.nlm.nih.gov/sites/entrez?cmd=retrieve&db=pubmed&list_uids=21177974&dopt=DocSum	http://www.modencode.org/White.shtml	21177974(MI:0225(ChIP-chip) and ChIP-seq)	null	modENCODE-24-JAN-11	http://www.modencode.org/White.shtml	2014-10-01	pd
FBgn0261434	FBgn0259230	hkb	lectin-22C	PDI: Transcription factor-Gene	-0.1541	-	lectin-22C	hkb	21177974	http://www.ncbi.nlm.nih.gov/sites/entrez?cmd=retrieve&db=pubmed&list_uids=21177974&dopt=DocSum	http://www.modencode.org/White.shtml	21177974(MI:0225(ChIP-chip) and ChIP-seq)	null	modENCODE-24-JAN-11	http://www.modencode.org/White.shtml	2014-10-01	pd
FBgn0261434	FBgn0000576	hkb	ems	PDI: Transcription factor-Gene	0.5104	-	ems	hkb	21177974	http://www.ncbi.nlm.nih.gov/sites/entrez?cmd=retrieve&db=pubmed&list_uids=21177974&dopt=DocSum	http://www.modencode.org/White.shtml	21177974(MI:0225(ChIP-chip) and ChIP-seq)	null	modENCODE-24-JAN-11	http://www.modencode.org/White.shtml	2014-10-01	pd
FBgn0261434	FBgn0000577	hkb	en	PDI: Transcription factor-Gene	0.535	-	en	hkb	21177974	http://www.ncbi.nlm.nih.gov/sites/entrez?cmd=retrieve&db=pubmed&list_uids=21177974&dopt=DocSum	http://www.modencode.org/White.shtml	21177974(MI:0225(ChIP-chip) and ChIP-seq)	null	modENCODE-24-JAN-11	http://www.modencode.org/White.shtml	2014-10-01	pd
FBgn0261434	FBgn0030000	hkb	CG2260	PDI: Transcription factor-Gene	0.5691	-	CG2260	hkb	21177974	http://www.ncbi.nlm.nih.gov/sites/entrez?cmd=retrieve&db=pubmed&list_uids=21177974&dopt=DocSum	http://www.modencode.org/White.shtml	21177974(MI:0225(ChIP-chip) and ChIP-seq)	null	modENCODE-24-JAN-11	http://www.modencode.org/White.shtml	2014-10-01	pd
FBgn0261434	FBgn0000536	hkb	eas	PDI: Transcription factor-Gene	-0.4468	-	eas	hkb	21177974	http://www.ncbi.nlm.nih.gov/sites/entrez?cmd=retrieve&db=pubmed&list_uids=21177974&dopt=DocSum	http://www.modencode.org/White.shtml	21177974(MI:0225(ChIP-chip) and ChIP-seq)	null	modENCODE-24-JAN-11	http://www.modencode.org/White.shtml	2014-10-01	pd
FBgn0261434	FBgn0051103	hkb	CG31103	PDI: Transcription factor-Gene	-0.2499	-	CG31103	hkb	21177974	http://www.ncbi.nlm.nih.gov/sites/entrez?cmd=retrieve&db=pubmed&list_uids=21177974&dopt=DocSum	http://www.modencode.org/White.shtml	21177974(MI:0225(ChIP-chip) and ChIP-seq)	null	modENCODE-24-JAN-11	http://www.modencode.org/White.shtml	2014-10-01	pd
FBgn0261434	FBgn0030912	hkb	CG6023	PDI: Transcription factor-Gene	-0.4072	-	CG6023	hkb	21177974	http://www.ncbi.nlm.nih.gov/sites/entrez?cmd=retrieve&db=pubmed&list_uids=21177974&dopt=DocSum	http://www.modencode.org/White.shtml	21177974(MI:0225(ChIP-chip) and ChIP-seq)	null	modENCODE-24-JAN-11	http://www.modencode.org/White.shtml	2014-10-01	pd
FBgn0261434	FBgn0030276	hkb	Dlic	PDI: Transcription factor-Gene	-0.2748	-	Dlic	hkb	21177974	http://www.ncbi.nlm.nih.gov/sites/entrez?cmd=retrieve&db=pubmed&list_uids=21177974&dopt=DocSum	http://www.modencode.org/White.shtml	21177974(MI:0225(ChIP-chip) and ChIP-seq)	null	modENCODE-24-JAN-11	http://www.modencode.org/White.shtml	2014-10-01	pd
FBgn0261434	FBgn0035767	hkb	Cln7	PDI: Transcription factor-Gene	-0.0423	-	CG8596	hkb	21177974	http://www.ncbi.nlm.nih.gov/sites/entrez?cmd=retrieve&db=pubmed&list_uids=21177974&dopt=DocSum	http://www.modencode.org/White.shtml	21177974(MI:0225(ChIP-chip) and ChIP-seq)	null	modENCODE-24-JAN-11	http://www.modencode.org/White.shtml	2014-10-01	pd
FBgn0261434	FBgn0035762	hkb	Rint1	PDI: Transcription factor-Gene	-0.0098	-	Rint1	hkb	21177974	http://www.ncbi.nlm.nih.gov/sites/entrez?cmd=retrieve&db=pubmed&list_uids=21177974&dopt=DocSum	http://www.modencode.org/White.shtml	21177974(MI:0225(ChIP-chip) and ChIP-seq)	null	modENCODE-24-JAN-11	http://www.modencode.org/White.shtml	2014-10-01	pd
FBgn0261434	FBgn0027375	hkb	RecQ5	PDI: Transcription factor-Gene	0.3909	-	RecQ5	hkb	21177974	http://www.ncbi.nlm.nih.gov/sites/entrez?cmd=retrieve&db=pubmed&list_uids=21177974&dopt=DocSum	http://www.modencode.org/White.shtml	21177974(MI:0225(ChIP-chip) and ChIP-seq)	null	modENCODE-24-JAN-11	http://www.modencode.org/White.shtml	2014-10-01	pd
FBgn0261434	FBgn0035761	hkb	RhoGEF4	PDI: Transcription factor-Gene	0.8341	-	RhoGEF4	hkb	21177974	http://www.ncbi.nlm.nih.gov/sites/entrez?cmd=retrieve&db=pubmed&list_uids=21177974&dopt=DocSum	http://www.modencode.org/White.shtml	21177974(MI:0225(ChIP-chip) and ChIP-seq)	null	modENCODE-24-JAN-11	http://www.modencode.org/White.shtml	2014-10-01	pd
FBgn0261434	FBgn0030659	hkb	CG9215	PDI: Transcription factor-Gene	0.3939	-	CG9215	hkb	21177974	http://www.ncbi.nlm.nih.gov/sites/entrez?cmd=retrieve&db=pubmed&list_uids=21177974&dopt=DocSum	http://www.modencode.org/White.shtml	21177974(MI:0225(ChIP-chip) and ChIP-seq)	null	modENCODE-24-JAN-11	http://www.modencode.org/White.shtml	2014-10-01	pd
FBgn0261434	FBgn0033783	hkb	CG17019	PDI: Transcription factor-Gene	-0.0731	-	CG17019	hkb	21177974	http://www.ncbi.nlm.nih.gov/sites/entrez?cmd=retrieve&db=pubmed&list_uids=21177974&dopt=DocSum	http://www.modencode.org/White.shtml	21177974(MI:0225(ChIP-chip) and ChIP-seq)	null	modENCODE-24-JAN-11	http://www.modencode.org/White.shtml	2014-10-01	pd
FBgn0261434	FBgn0030660	hkb	CG8097	PDI: Transcription factor-Gene	0.0788	-	CG8097	hkb	21177974	http://www.ncbi.nlm.nih.gov/sites/entrez?cmd=retrieve&db=pubmed&list_uids=21177974&dopt=DocSum	http://www.modencode.org/White.shtml	21177974(MI:0225(ChIP-chip) and ChIP-seq)	null	modENCODE-24-JAN-11	http://www.modencode.org/White.shtml	2014-10-01	pd
FBgn0261434	FBgn0053229	hkb	CG33229	PDI: Transcription factor-Gene	0.1661	-	CG33229	hkb	21177974	http://www.ncbi.nlm.nih.gov/sites/entrez?cmd=retrieve&db=pubmed&list_uids=21177974&dopt=DocSum	http://www.modencode.org/White.shtml	21177974(MI:0225(ChIP-chip) and ChIP-seq)	null	modENCODE-24-JAN-11	http://www.modencode.org/White.shtml	2014-10-01	pd
FBgn0261434	FBgn0027572	hkb	CG5009	PDI: Transcription factor-Gene	-0.4734	-	CG5009	hkb	21177974	http://www.ncbi.nlm.nih.gov/sites/entrez?cmd=retrieve&db=pubmed&list_uids=21177974&dopt=DocSum	http://www.modencode.org/White.shtml	21177974(MI:0225(ChIP-chip) and ChIP-seq)	null	modENCODE-24-JAN-11	http://www.modencode.org/White.shtml	2014-10-01	pd
FBgn0261434	FBgn0020930	hkb	Dgkepsilon	PDI: Transcription factor-Gene	-0.0116	-	DgkŒµ	hkb	21177974	http://www.ncbi.nlm.nih.gov/sites/entrez?cmd=retrieve&db=pubmed&list_uids=21177974&dopt=DocSum	http://www.modencode.org/White.shtml	21177974(MI:0225(ChIP-chip) and ChIP-seq)	null	modENCODE-24-JAN-11	http://www.modencode.org/White.shtml	2014-10-01	pd
FBgn0261434	FBgn0030269	hkb	CDK2AP1	PDI: Transcription factor-Gene	0.6154	-	CDK2AP1	hkb	21177974	http://www.ncbi.nlm.nih.gov/sites/entrez?cmd=retrieve&db=pubmed&list_uids=21177974&dopt=DocSum	http://www.modencode.org/White.shtml	21177974(MI:0225(ChIP-chip) and ChIP-seq)	null	modENCODE-24-JAN-11	http://www.modencode.org/White.shtml	2014-10-01	pd
FBgn0261434	FBgn0259221	hkb	CG42321	PDI: Transcription factor-Gene	-0.2098	-	CG42321	hkb	21177974	http://www.ncbi.nlm.nih.gov/sites/entrez?cmd=retrieve&db=pubmed&list_uids=21177974&dopt=DocSum	http://www.modencode.org/White.shtml	21177974(MI:0225(ChIP-chip) and ChIP-seq)	null	modENCODE-24-JAN-11	http://www.modencode.org/White.shtml	2014-10-01	pd
FBgn0261434	FBgn0023416	hkb	Ac3	PDI: Transcription factor-Gene	0.292	-	Ac3	hkb	21177974	http://www.ncbi.nlm.nih.gov/sites/entrez?cmd=retrieve&db=pubmed&list_uids=21177974&dopt=DocSum	http://www.modencode.org/White.shtml	21177974(MI:0225(ChIP-chip) and ChIP-seq)	null	modENCODE-24-JAN-11	http://www.modencode.org/White.shtml	2014-10-01	pd
FBgn0261434	FBgn0038100	hkb	Paip2	PDI: Transcription factor-Gene	-0.2204	-	Paip2	hkb	21177974	http://www.ncbi.nlm.nih.gov/sites/entrez?cmd=retrieve&db=pubmed&list_uids=21177974&dopt=DocSum	http://www.modencode.org/White.shtml	21177974(MI:0225(ChIP-chip) and ChIP-seq)	null	modENCODE-24-JAN-11	http://www.modencode.org/White.shtml	2014-10-01	pd
FBgn0261434	FBgn0085257	hkb	CG34228	PDI: Transcription factor-Gene	-0.4856	-	CG34228	hkb	21177974	http://www.ncbi.nlm.nih.gov/sites/entrez?cmd=retrieve&db=pubmed&list_uids=21177974&dopt=DocSum	http://www.modencode.org/White.shtml	21177974(MI:0225(ChIP-chip) and ChIP-seq)	null	modENCODE-24-JAN-11	http://www.modencode.org/White.shtml	2014-10-01	pd
FBgn0261434	FBgn0031505	hkb	ND-B14.5B	PDI: Transcription factor-Gene	-0.2479	-	ND-B14.5B	hkb	21177974	http://www.ncbi.nlm.nih.gov/sites/entrez?cmd=retrieve&db=pubmed&list_uids=21177974&dopt=DocSum	http://www.modencode.org/White.shtml	21177974(MI:0225(ChIP-chip) and ChIP-seq)	null	modENCODE-24-JAN-11	http://www.modencode.org/White.shtml	2014-10-01	pd
FBgn0261434	FBgn0030268	hkb	Klp10A	PDI: Transcription factor-Gene	0.1801	-	Klp10A	hkb	21177974	http://www.ncbi.nlm.nih.gov/sites/entrez?cmd=retrieve&db=pubmed&list_uids=21177974&dopt=DocSum	http://www.modencode.org/White.shtml	21177974(MI:0225(ChIP-chip) and ChIP-seq)	null	modENCODE-24-JAN-11	http://www.modencode.org/White.shtml	2014-10-01	pd
FBgn0261434	FBgn0024947	hkb	NTPase	PDI: Transcription factor-Gene	0.1908	-	NTPase	hkb	21177974	http://www.ncbi.nlm.nih.gov/sites/entrez?cmd=retrieve&db=pubmed&list_uids=21177974&dopt=DocSum	http://www.modencode.org/White.shtml	21177974(MI:0225(ChIP-chip) and ChIP-seq)	null	modENCODE-24-JAN-11	http://www.modencode.org/White.shtml	2014-10-01	pd
FBgn0261434	FBgn0035754	hkb	MED4	PDI: Transcription factor-Gene	0.6562	-	MED4	hkb	21177974	http://www.ncbi.nlm.nih.gov/sites/entrez?cmd=retrieve&db=pubmed&list_uids=21177974&dopt=DocSum	http://www.modencode.org/White.shtml	21177974(MI:0225(ChIP-chip) and ChIP-seq)	null	modENCODE-24-JAN-11	http://www.modencode.org/White.shtml	2014-10-01	pd
FBgn0261434	FBgn0035753	hkb	RpL18	PDI: Transcription factor-Gene	-0.3493	-	RpL18	hkb	21177974	http://www.ncbi.nlm.nih.gov/sites/entrez?cmd=retrieve&db=pubmed&list_uids=21177974&dopt=DocSum	http://www.modencode.org/White.shtml	21177974(MI:0225(ChIP-chip) and ChIP-seq)	null	modENCODE-24-JAN-11	http://www.modencode.org/White.shtml	2014-10-01	pd
FBgn0261434	FBgn0037261	hkb	CG9775	PDI: Transcription factor-Gene	0.6702	-	CG9775	hkb	21177974	http://www.ncbi.nlm.nih.gov/sites/entrez?cmd=retrieve&db=pubmed&list_uids=21177974&dopt=DocSum	http://www.modencode.org/White.shtml	21177974(MI:0225(ChIP-chip) and ChIP-seq)	null	modENCODE-24-JAN-11	http://www.modencode.org/White.shtml	2014-10-01	pd
FBgn0261434	FBgn0037069	hkb	Cpr78Cc	PDI: Transcription factor-Gene	-0.1691	-	Cpr78Cc	hkb	21177974	http://www.ncbi.nlm.nih.gov/sites/entrez?cmd=retrieve&db=pubmed&list_uids=21177974&dopt=DocSum	http://www.modencode.org/White.shtml	21177974(MI:0225(ChIP-chip) and ChIP-seq)	null	modENCODE-24-JAN-11	http://www.modencode.org/White.shtml	2014-10-01	pd
FBgn0261434	FBgn0030670	hkb	Pis	PDI: Transcription factor-Gene	-0.446	-	Pis	hkb	21177974	http://www.ncbi.nlm.nih.gov/sites/entrez?cmd=retrieve&db=pubmed&list_uids=21177974&dopt=DocSum	http://www.modencode.org/White.shtml	21177974(MI:0225(ChIP-chip) and ChIP-seq)	null	modENCODE-24-JAN-11	http://www.modencode.org/White.shtml	2014-10-01	pd
FBgn0261434	FBgn0027581	hkb	CG6191	PDI: Transcription factor-Gene	-0.2141	-	CG6191	hkb	21177974	http://www.ncbi.nlm.nih.gov/sites/entrez?cmd=retrieve&db=pubmed&list_uids=21177974&dopt=DocSum	http://www.modencode.org/White.shtml	21177974(MI:0225(ChIP-chip) and ChIP-seq)	null	modENCODE-24-JAN-11	http://www.modencode.org/White.shtml	2014-10-01	pd
FBgn0261434	FBgn0030671	hkb	CG8134	PDI: Transcription factor-Gene	-0.176	-	CG8134	hkb	21177974	http://www.ncbi.nlm.nih.gov/sites/entrez?cmd=retrieve&db=pubmed&list_uids=21177974&dopt=DocSum	http://www.modencode.org/White.shtml	21177974(MI:0225(ChIP-chip) and ChIP-seq)	null	modENCODE-24-JAN-11	http://www.modencode.org/White.shtml	2014-10-01	pd
FBgn0261434	FBgn0010651	hkb	MFS14	PDI: Transcription factor-Gene	-0.0357	-	MFS14	hkb	21177974	http://www.ncbi.nlm.nih.gov/sites/entrez?cmd=retrieve&db=pubmed&list_uids=21177974&dopt=DocSum	http://www.modencode.org/White.shtml	21177974(MI:0225(ChIP-chip) and ChIP-seq)	null	modENCODE-24-JAN-11	http://www.modencode.org/White.shtml	2014-10-01	pd
FBgn0261434	FBgn0037065	hkb	CG12974	PDI: Transcription factor-Gene	-0.2615	-	CG12974	hkb	21177974	http://www.ncbi.nlm.nih.gov/sites/entrez?cmd=retrieve&db=pubmed&list_uids=21177974&dopt=DocSum	http://www.modencode.org/White.shtml	21177974(MI:0225(ChIP-chip) and ChIP-seq)	null	modENCODE-24-JAN-11	http://www.modencode.org/White.shtml	2014-10-01	pd
FBgn0261434	FBgn0259214	hkb	PMCA	PDI: Transcription factor-Gene	-0.0999	-	PMCA	hkb	21177974	http://www.ncbi.nlm.nih.gov/sites/entrez?cmd=retrieve&db=pubmed&list_uids=21177974&dopt=DocSum	http://www.modencode.org/White.shtml	21177974(MI:0225(ChIP-chip) and ChIP-seq)	null	modENCODE-24-JAN-11	http://www.modencode.org/White.shtml	2014-10-01	pd
FBgn0261434	FBgn0259212	hkb	cno	PDI: Transcription factor-Gene	0.3953	-	cno	hkb	21177974	http://www.ncbi.nlm.nih.gov/sites/entrez?cmd=retrieve&db=pubmed&list_uids=21177974&dopt=DocSum	http://www.modencode.org/White.shtml	21177974(MI:0225(ChIP-chip) and ChIP-seq)	null	modENCODE-24-JAN-11	http://www.modencode.org/White.shtml	2014-10-01	pd
FBgn0261434	FBgn0027588	hkb	GCS2alpha	PDI: Transcription factor-Gene	0.3621	-	GCS2Œ±	hkb	21177974	http://www.ncbi.nlm.nih.gov/sites/entrez?cmd=retrieve&db=pubmed&list_uids=21177974&dopt=DocSum	http://www.modencode.org/White.shtml	21177974(MI:0225(ChIP-chip) and ChIP-seq)	null	modENCODE-24-JAN-11	http://www.modencode.org/White.shtml	2014-10-01	pd
FBgn0261434	FBgn0259211	hkb	grh	PDI: Transcription factor-Gene	0.2298	-	grh	hkb	21177974	http://www.ncbi.nlm.nih.gov/sites/entrez?cmd=retrieve&db=pubmed&list_uids=21177974&dopt=DocSum	http://www.modencode.org/White.shtml	21177974(MI:0225(ChIP-chip) and ChIP-seq)	null	modENCODE-24-JAN-11	http://www.modencode.org/White.shtml	2014-10-01	pd
FBgn0261434	FBgn0023407	hkb	B4	PDI: Transcription factor-Gene	-	-	B4	hkb	21177974	http://www.ncbi.nlm.nih.gov/sites/entrez?cmd=retrieve&db=pubmed&list_uids=21177974&dopt=DocSum	http://www.modencode.org/White.shtml	21177974(MI:0225(ChIP-chip) and ChIP-seq)	null	modENCODE-24-JAN-11	http://www.modencode.org/White.shtml	2014-10-01	pd
FBgn0261434	FBgn0050055	hkb	lncRNA:CR30055	PDI: Transcription factor-Gene	-0.1933	-	CR30055	hkb	21177974	http://www.ncbi.nlm.nih.gov/sites/entrez?cmd=retrieve&db=pubmed&list_uids=21177974&dopt=DocSum	http://www.modencode.org/White.shtml	21177974(MI:0225(ChIP-chip) and ChIP-seq)	null	modENCODE-24-JAN-11	http://www.modencode.org/White.shtml	2014-10-01	pd
FBgn0261434	FBgn0053258	hkb	CG33258	PDI: Transcription factor-Gene	-0.1701	-	CG33258	hkb	21177974	http://www.ncbi.nlm.nih.gov/sites/entrez?cmd=retrieve&db=pubmed&list_uids=21177974&dopt=DocSum	http://www.modencode.org/White.shtml	21177974(MI:0225(ChIP-chip) and ChIP-seq)	null	modENCODE-24-JAN-11	http://www.modencode.org/White.shtml	2014-10-01	pd
FBgn0261434	FBgn0026872	hkb	CG14777	PDI: Transcription factor-Gene	-0.2688	-	CG14777	hkb	21177974	http://www.ncbi.nlm.nih.gov/sites/entrez?cmd=retrieve&db=pubmed&list_uids=21177974&dopt=DocSum	http://www.modencode.org/White.shtml	21177974(MI:0225(ChIP-chip) and ChIP-seq)	null	modENCODE-24-JAN-11	http://www.modencode.org/White.shtml	2014-10-01	pd
FBgn0261434	FBgn0037835	hkb	CG14687	PDI: Transcription factor-Gene	-0.0563	-	CG14687	hkb	21177974	http://www.ncbi.nlm.nih.gov/sites/entrez?cmd=retrieve&db=pubmed&list_uids=21177974&dopt=DocSum	http://www.modencode.org/White.shtml	21177974(MI:0225(ChIP-chip) and ChIP-seq)	null	modENCODE-24-JAN-11	http://www.modencode.org/White.shtml	2014-10-01	pd
FBgn0261434	FBgn0050051	hkb	Tmem18	PDI: Transcription factor-Gene	-0.1913	-	CG30051	hkb	21177974	http://www.ncbi.nlm.nih.gov/sites/entrez?cmd=retrieve&db=pubmed&list_uids=21177974&dopt=DocSum	http://www.modencode.org/White.shtml	21177974(MI:0225(ChIP-chip) and ChIP-seq)	null	modENCODE-24-JAN-11	http://www.modencode.org/White.shtml	2014-10-01	pd
FBgn0261434	FBgn0039938	hkb	Sox102F	PDI: Transcription factor-Gene	-0.1489	-	Sox102F	hkb	21177974	http://www.ncbi.nlm.nih.gov/sites/entrez?cmd=retrieve&db=pubmed&list_uids=21177974&dopt=DocSum	http://www.modencode.org/White.shtml	21177974(MI:0225(ChIP-chip) and ChIP-seq)	null	modENCODE-24-JAN-11	http://www.modencode.org/White.shtml	2014-10-01	pd
FBgn0261434	FBgn0037834	hkb	Art1	PDI: Transcription factor-Gene	0.5065	-	Art1	hkb	21177974	http://www.ncbi.nlm.nih.gov/sites/entrez?cmd=retrieve&db=pubmed&list_uids=21177974&dopt=DocSum	http://www.modencode.org/White.shtml	21177974(MI:0225(ChIP-chip) and ChIP-seq)	null	modENCODE-24-JAN-11	http://www.modencode.org/White.shtml	2014-10-01	pd
FBgn0261434	FBgn0069242	hkb	eca	PDI: Transcription factor-Gene	0.1152	-	eca	hkb	21177974	http://www.ncbi.nlm.nih.gov/sites/entrez?cmd=retrieve&db=pubmed&list_uids=21177974&dopt=DocSum	http://www.modencode.org/White.shtml	21177974(MI:0225(ChIP-chip) and ChIP-seq)	null	modENCODE-24-JAN-11	http://www.modencode.org/White.shtml	2014-10-01	pd
FBgn0261434	FBgn0004797	hkb	mdy	PDI: Transcription factor-Gene	-0.1412	-	mdy	hkb	21177974	http://www.ncbi.nlm.nih.gov/sites/entrez?cmd=retrieve&db=pubmed&list_uids=21177974&dopt=DocSum	http://www.modencode.org/White.shtml	21177974(MI:0225(ChIP-chip) and ChIP-seq)	null	modENCODE-24-JAN-11	http://www.modencode.org/White.shtml	2014-10-01	pd
FBgn0261434	FBgn0030049	hkb	Trf4-1	PDI: Transcription factor-Gene	0.295	-	Trf4-1	hkb	21177974	http://www.ncbi.nlm.nih.gov/sites/entrez?cmd=retrieve&db=pubmed&list_uids=21177974&dopt=DocSum	http://www.modencode.org/White.shtml	21177974(MI:0225(ChIP-chip) and ChIP-seq)	null	modENCODE-24-JAN-11	http://www.modencode.org/White.shtml	2014-10-01	pd
FBgn0261434	FBgn0030057	hkb	Ppt1	PDI: Transcription factor-Gene	0.4411	-	Ppt1	hkb	21177974	http://www.ncbi.nlm.nih.gov/sites/entrez?cmd=retrieve&db=pubmed&list_uids=21177974&dopt=DocSum	http://www.modencode.org/White.shtml	21177974(MI:0225(ChIP-chip) and ChIP-seq)	null	modENCODE-24-JAN-11	http://www.modencode.org/White.shtml	2014-10-01	pd
FBgn0261434	FBgn0025382	hkb	Rab27	PDI: Transcription factor-Gene	0.608	-	Rab27	hkb	21177974	http://www.ncbi.nlm.nih.gov/sites/entrez?cmd=retrieve&db=pubmed&list_uids=21177974&dopt=DocSum	http://www.modencode.org/White.shtml	21177974(MI:0225(ChIP-chip) and ChIP-seq)	null	modENCODE-24-JAN-11	http://www.modencode.org/White.shtml	2014-10-01	pd
FBgn0261434	FBgn0030055	hkb	CG12772	PDI: Transcription factor-Gene	0.0114	-	CG12772	hkb	21177974	http://www.ncbi.nlm.nih.gov/sites/entrez?cmd=retrieve&db=pubmed&list_uids=21177974&dopt=DocSum	http://www.modencode.org/White.shtml	21177974(MI:0225(ChIP-chip) and ChIP-seq)	null	modENCODE-24-JAN-11	http://www.modencode.org/White.shtml	2014-10-01	pd
FBgn0261434	FBgn0000316	hkb	cin	PDI: Transcription factor-Gene	0.7878	-	cin	hkb	21177974	http://www.ncbi.nlm.nih.gov/sites/entrez?cmd=retrieve&db=pubmed&list_uids=21177974&dopt=DocSum	http://www.modencode.org/White.shtml	21177974(MI:0225(ChIP-chip) and ChIP-seq)	null	modENCODE-24-JAN-11	http://www.modencode.org/White.shtml	2014-10-01	pd
FBgn0261434	FBgn0030053	hkb	CG12081	PDI: Transcription factor-Gene	0.1957	-	CG12081	hkb	21177974	http://www.ncbi.nlm.nih.gov/sites/entrez?cmd=retrieve&db=pubmed&list_uids=21177974&dopt=DocSum	http://www.modencode.org/White.shtml	21177974(MI:0225(ChIP-chip) and ChIP-seq)	null	modENCODE-24-JAN-11	http://www.modencode.org/White.shtml	2014-10-01	pd
FBgn0261434	FBgn0000319	hkb	Chc	PDI: Transcription factor-Gene	0.1896	-	Chc	hkb	21177974	http://www.ncbi.nlm.nih.gov/sites/entrez?cmd=retrieve&db=pubmed&list_uids=21177974&dopt=DocSum	http://www.modencode.org/White.shtml	21177974(MI:0225(ChIP-chip) and ChIP-seq)	null	modENCODE-24-JAN-11	http://www.modencode.org/White.shtml	2014-10-01	pd
FBgn0261434	FBgn0259481	hkb	Mob2	PDI: Transcription factor-Gene	-0.154	-	Mob2	hkb	21177974	http://www.ncbi.nlm.nih.gov/sites/entrez?cmd=retrieve&db=pubmed&list_uids=21177974&dopt=DocSum	http://www.modencode.org/White.shtml	21177974(MI:0225(ChIP-chip) and ChIP-seq)	null	modENCODE-24-JAN-11	http://www.modencode.org/White.shtml	2014-10-01	pd
FBgn0261434	FBgn0030642	hkb	CG15642	PDI: Transcription factor-Gene	0.3823	-	CG15642	hkb	21177974	http://www.ncbi.nlm.nih.gov/sites/entrez?cmd=retrieve&db=pubmed&list_uids=21177974&dopt=DocSum	http://www.modencode.org/White.shtml	21177974(MI:0225(ChIP-chip) and ChIP-seq)	null	modENCODE-24-JAN-11	http://www.modencode.org/White.shtml	2014-10-01	pd
FBgn0261434	FBgn0040372	hkb	G9a	PDI: Transcription factor-Gene	0.0889	-	G9a	hkb	21177974	http://www.ncbi.nlm.nih.gov/sites/entrez?cmd=retrieve&db=pubmed&list_uids=21177974&dopt=DocSum	http://www.modencode.org/White.shtml	21177974(MI:0225(ChIP-chip) and ChIP-seq)	null	modENCODE-24-JAN-11	http://www.modencode.org/White.shtml	2014-10-01	pd
FBgn0261434	FBgn0040373	hkb	CG3038	PDI: Transcription factor-Gene	0.4937	-	CG3038	hkb	21177974	http://www.ncbi.nlm.nih.gov/sites/entrez?cmd=retrieve&db=pubmed&list_uids=21177974&dopt=DocSum	http://www.modencode.org/White.shtml	21177974(MI:0225(ChIP-chip) and ChIP-seq)	null	modENCODE-24-JAN-11	http://www.modencode.org/White.shtml	2014-10-01	pd
FBgn0261434	FBgn0037636	hkb	CG9821	PDI: Transcription factor-Gene	0.4775	-	CG9821	hkb	21177974	http://www.ncbi.nlm.nih.gov/sites/entrez?cmd=retrieve&db=pubmed&list_uids=21177974&dopt=DocSum	http://www.modencode.org/White.shtml	21177974(MI:0225(ChIP-chip) and ChIP-seq)	null	modENCODE-24-JAN-11	http://www.modencode.org/White.shtml	2014-10-01	pd
FBgn0261434	FBgn0033556	hkb	CG12343	PDI: Transcription factor-Gene	0.4167	-	CG12343	hkb	21177974	http://www.ncbi.nlm.nih.gov/sites/entrez?cmd=retrieve&db=pubmed&list_uids=21177974&dopt=DocSum	http://www.modencode.org/White.shtml	21177974(MI:0225(ChIP-chip) and ChIP-seq)	null	modENCODE-24-JAN-11	http://www.modencode.org/White.shtml	2014-10-01	pd
FBgn0261434	FBgn0033557	hkb	CG12325	PDI: Transcription factor-Gene	0.4672	-	CG12325	hkb	21177974	http://www.ncbi.nlm.nih.gov/sites/entrez?cmd=retrieve&db=pubmed&list_uids=21177974&dopt=DocSum	http://www.modencode.org/White.shtml	21177974(MI:0225(ChIP-chip) and ChIP-seq)	null	modENCODE-24-JAN-11	http://www.modencode.org/White.shtml	2014-10-01	pd
FBgn0261434	FBgn0030455	hkb	CG4318	PDI: Transcription factor-Gene	-0.2343	-	CG4318	hkb	21177974	http://www.ncbi.nlm.nih.gov/sites/entrez?cmd=retrieve&db=pubmed&list_uids=21177974&dopt=DocSum	http://www.modencode.org/White.shtml	21177974(MI:0225(ChIP-chip) and ChIP-seq)	null	modENCODE-24-JAN-11	http://www.modencode.org/White.shtml	2014-10-01	pd
FBgn0261434	FBgn0027363	hkb	Stam	PDI: Transcription factor-Gene	-0.0803	-	Stam	hkb	21177974	http://www.ncbi.nlm.nih.gov/sites/entrez?cmd=retrieve&db=pubmed&list_uids=21177974&dopt=DocSum	http://www.modencode.org/White.shtml	21177974(MI:0225(ChIP-chip) and ChIP-seq)	null	modENCODE-24-JAN-11	http://www.modencode.org/White.shtml	2014-10-01	pd
FBgn0261434	FBgn0030643	hkb	CG15641	PDI: Transcription factor-Gene	-0.1127	-	CG15641	hkb	21177974	http://www.ncbi.nlm.nih.gov/sites/entrez?cmd=retrieve&db=pubmed&list_uids=21177974&dopt=DocSum	http://www.modencode.org/White.shtml	21177974(MI:0225(ChIP-chip) and ChIP-seq)	null	modENCODE-24-JAN-11	http://www.modencode.org/White.shtml	2014-10-01	pd
FBgn0261434	FBgn0036980	hkb	RhoBTB	PDI: Transcription factor-Gene	0.1434	-	RhoBTB	hkb	21177974	http://www.ncbi.nlm.nih.gov/sites/entrez?cmd=retrieve&db=pubmed&list_uids=21177974&dopt=DocSum	http://www.modencode.org/White.shtml	21177974(MI:0225(ChIP-chip) and ChIP-seq)	null	modENCODE-24-JAN-11	http://www.modencode.org/White.shtml	2014-10-01	pd
FBgn0261434	FBgn0053260	hkb	CG33260	PDI: Transcription factor-Gene	-0.2194	-	CG33260	hkb	21177974	http://www.ncbi.nlm.nih.gov/sites/entrez?cmd=retrieve&db=pubmed&list_uids=21177974&dopt=DocSum	http://www.modencode.org/White.shtml	21177974(MI:0225(ChIP-chip) and ChIP-seq)	null	modENCODE-24-JAN-11	http://www.modencode.org/White.shtml	2014-10-01	pd
FBgn0261434	FBgn0036136	hkb	Ufd1-like	PDI: Transcription factor-Gene	-0.1605	-	Ufd1-like	hkb	21177974	http://www.ncbi.nlm.nih.gov/sites/entrez?cmd=retrieve&db=pubmed&list_uids=21177974&dopt=DocSum	http://www.modencode.org/White.shtml	21177974(MI:0225(ChIP-chip) and ChIP-seq)	null	modENCODE-24-JAN-11	http://www.modencode.org/White.shtml	2014-10-01	pd
FBgn0261434	FBgn0038165	hkb	Task6	PDI: Transcription factor-Gene	0.1604	-	Task6	hkb	21177974	http://www.ncbi.nlm.nih.gov/sites/entrez?cmd=retrieve&db=pubmed&list_uids=21177974&dopt=DocSum	http://www.modencode.org/White.shtml	21177974(MI:0225(ChIP-chip) and ChIP-seq)	null	modENCODE-24-JAN-11	http://www.modencode.org/White.shtml	2014-10-01	pd
FBgn0261434	FBgn0030940	hkb	CG15040	PDI: Transcription factor-Gene	-0.224	-	CG15040	hkb	21177974	http://www.ncbi.nlm.nih.gov/sites/entrez?cmd=retrieve&db=pubmed&list_uids=21177974&dopt=DocSum	http://www.modencode.org/White.shtml	21177974(MI:0225(ChIP-chip) and ChIP-seq)	null	modENCODE-24-JAN-11	http://www.modencode.org/White.shtml	2014-10-01	pd
FBgn0261434	FBgn0036988	hkb	CG5262	PDI: Transcription factor-Gene	-0.0474	-	CG5262	hkb	21177974	http://www.ncbi.nlm.nih.gov/sites/entrez?cmd=retrieve&db=pubmed&list_uids=21177974&dopt=DocSum	http://www.modencode.org/White.shtml	21177974(MI:0225(ChIP-chip) and ChIP-seq)	null	modENCODE-24-JAN-11	http://www.modencode.org/White.shtml	2014-10-01	pd
FBgn0261434	FBgn0025373	hkb	Fpps	PDI: Transcription factor-Gene	0.3972	-	Fpps	hkb	21177974	http://www.ncbi.nlm.nih.gov/sites/entrez?cmd=retrieve&db=pubmed&list_uids=21177974&dopt=DocSum	http://www.modencode.org/White.shtml	21177974(MI:0225(ChIP-chip) and ChIP-seq)	null	modENCODE-24-JAN-11	http://www.modencode.org/White.shtml	2014-10-01	pd
FBgn0261434	FBgn0030048	hkb	CG12112	PDI: Transcription factor-Gene	0.2021	-	CG12112	hkb	21177974	http://www.ncbi.nlm.nih.gov/sites/entrez?cmd=retrieve&db=pubmed&list_uids=21177974&dopt=DocSum	http://www.modencode.org/White.shtml	21177974(MI:0225(ChIP-chip) and ChIP-seq)	null	modENCODE-24-JAN-11	http://www.modencode.org/White.shtml	2014-10-01	pd
FBgn0261434	FBgn0035088	hkb	CG3776	PDI: Transcription factor-Gene	0.4924	-	CG3776	hkb	21177974	http://www.ncbi.nlm.nih.gov/sites/entrez?cmd=retrieve&db=pubmed&list_uids=21177974&dopt=DocSum	http://www.modencode.org/White.shtml	21177974(MI:0225(ChIP-chip) and ChIP-seq)	null	modENCODE-24-JAN-11	http://www.modencode.org/White.shtml	2014-10-01	pd
FBgn0261434	FBgn0026619	hkb	Taz	PDI: Transcription factor-Gene	-0.2102	-	Taz	hkb	21177974	http://www.ncbi.nlm.nih.gov/sites/entrez?cmd=retrieve&db=pubmed&list_uids=21177974&dopt=DocSum	http://www.modencode.org/White.shtml	21177974(MI:0225(ChIP-chip) and ChIP-seq)	null	modENCODE-24-JAN-11	http://www.modencode.org/White.shtml	2014-10-01	pd
FBgn0261434	FBgn0037046	hkb	CG10581	PDI: Transcription factor-Gene	-0.0042	-	CG10581	hkb	21177974	http://www.ncbi.nlm.nih.gov/sites/entrez?cmd=retrieve&db=pubmed&list_uids=21177974&dopt=DocSum	http://www.modencode.org/White.shtml	21177974(MI:0225(ChIP-chip) and ChIP-seq)	null	modENCODE-24-JAN-11	http://www.modencode.org/White.shtml	2014-10-01	pd
FBgn0261434	FBgn0039930	hkb	CG11077	PDI: Transcription factor-Gene	0.2189	-	CG11077	hkb	21177974	http://www.ncbi.nlm.nih.gov/sites/entrez?cmd=retrieve&db=pubmed&list_uids=21177974&dopt=DocSum	http://www.modencode.org/White.shtml	21177974(MI:0225(ChIP-chip) and ChIP-seq)	null	modENCODE-24-JAN-11	http://www.modencode.org/White.shtml	2014-10-01	pd
FBgn0261434	FBgn0266669	hkb	Sec3	PDI: Transcription factor-Gene	0.1988	-	Sec3	hkb	21177974	http://www.ncbi.nlm.nih.gov/sites/entrez?cmd=retrieve&db=pubmed&list_uids=21177974&dopt=DocSum	http://www.modencode.org/White.shtml	21177974(MI:0225(ChIP-chip) and ChIP-seq)	null	modENCODE-24-JAN-11	http://www.modencode.org/White.shtml	2014-10-01	pd
FBgn0261434	FBgn0037648	hkb	CG11975	PDI: Transcription factor-Gene	0.1811	-	CG11975	hkb	21177974	http://www.ncbi.nlm.nih.gov/sites/entrez?cmd=retrieve&db=pubmed&list_uids=21177974&dopt=DocSum	http://www.modencode.org/White.shtml	21177974(MI:0225(ChIP-chip) and ChIP-seq)	null	modENCODE-24-JAN-11	http://www.modencode.org/White.shtml	2014-10-01	pd
FBgn0261434	FBgn0266668	hkb	Exo84	PDI: Transcription factor-Gene	0.0186	-	Exo84	hkb	21177974	http://www.ncbi.nlm.nih.gov/sites/entrez?cmd=retrieve&db=pubmed&list_uids=21177974&dopt=DocSum	http://www.modencode.org/White.shtml	21177974(MI:0225(ChIP-chip) and ChIP-seq)	null	modENCODE-24-JAN-11	http://www.modencode.org/White.shtml	2014-10-01	pd
FBgn0261434	FBgn0037814	hkb	CG6325	PDI: Transcription factor-Gene	0.4863	-	CG6325	hkb	21177974	http://www.ncbi.nlm.nih.gov/sites/entrez?cmd=retrieve&db=pubmed&list_uids=21177974&dopt=DocSum	http://www.modencode.org/White.shtml	21177974(MI:0225(ChIP-chip) and ChIP-seq)	null	modENCODE-24-JAN-11	http://www.modencode.org/White.shtml	2014-10-01	pd
FBgn0261434	FBgn0030959	hkb	CG6961	PDI: Transcription factor-Gene	0.7666	-	CG6961	hkb	21177974	http://www.ncbi.nlm.nih.gov/sites/entrez?cmd=retrieve&db=pubmed&list_uids=21177974&dopt=DocSum	http://www.modencode.org/White.shtml	21177974(MI:0225(ChIP-chip) and ChIP-seq)	null	modENCODE-24-JAN-11	http://www.modencode.org/White.shtml	2014-10-01	pd
FBgn0261434	FBgn0033540	hkb	Elp2	PDI: Transcription factor-Gene	0.1534	-	Elp2	hkb	21177974	http://www.ncbi.nlm.nih.gov/sites/entrez?cmd=retrieve&db=pubmed&list_uids=21177974&dopt=DocSum	http://www.modencode.org/White.shtml	21177974(MI:0225(ChIP-chip) and ChIP-seq)	null	modENCODE-24-JAN-11	http://www.modencode.org/White.shtml	2014-10-01	pd
FBgn0261434	FBgn0030616	hkb	RpL37a	PDI: Transcription factor-Gene	-0.2927	-	RpL37a	hkb	21177974	http://www.ncbi.nlm.nih.gov/sites/entrez?cmd=retrieve&db=pubmed&list_uids=21177974&dopt=DocSum	http://www.modencode.org/White.shtml	21177974(MI:0225(ChIP-chip) and ChIP-seq)	null	modENCODE-24-JAN-11	http://www.modencode.org/White.shtml	2014-10-01	pd
FBgn0261434	FBgn0010808	hkb	Chchd3	PDI: Transcription factor-Gene	-0.1012	-	l(3)03670	hkb	21177974	http://www.ncbi.nlm.nih.gov/sites/entrez?cmd=retrieve&db=pubmed&list_uids=21177974&dopt=DocSum	http://www.modencode.org/White.shtml	21177974(MI:0225(ChIP-chip) and ChIP-seq)	null	modENCODE-24-JAN-11	http://www.modencode.org/White.shtml	2014-10-01	pd
FBgn0261434	FBgn0263006	hkb	SERCA	PDI: Transcription factor-Gene	-0.338	-	SERCA	hkb	21177974	http://www.ncbi.nlm.nih.gov/sites/entrez?cmd=retrieve&db=pubmed&list_uids=21177974&dopt=DocSum	http://www.modencode.org/White.shtml	21177974(MI:0225(ChIP-chip) and ChIP-seq)	null	modENCODE-24-JAN-11	http://www.modencode.org/White.shtml	2014-10-01	pd
FBgn0261434	FBgn0033738	hkb	DUBAI	PDI: Transcription factor-Gene	-0.0283	-	DUBAI	hkb	21177974	http://www.ncbi.nlm.nih.gov/sites/entrez?cmd=retrieve&db=pubmed&list_uids=21177974&dopt=DocSum	http://www.modencode.org/White.shtml	21177974(MI:0225(ChIP-chip) and ChIP-seq)	null	modENCODE-24-JAN-11	http://www.modencode.org/White.shtml	2014-10-01	pd
FBgn0261434	FBgn0033739	hkb	Dyb	PDI: Transcription factor-Gene	0.2855	-	Dyb	hkb	21177974	http://www.ncbi.nlm.nih.gov/sites/entrez?cmd=retrieve&db=pubmed&list_uids=21177974&dopt=DocSum	http://www.modencode.org/White.shtml	21177974(MI:0225(ChIP-chip) and ChIP-seq)	null	modENCODE-24-JAN-11	http://www.modencode.org/White.shtml	2014-10-01	pd
FBgn0261434	FBgn0017581	hkb	Lk6	PDI: Transcription factor-Gene	0.1119	-	Lk6	hkb	21177974	http://www.ncbi.nlm.nih.gov/sites/entrez?cmd=retrieve&db=pubmed&list_uids=21177974&dopt=DocSum	http://www.modencode.org/White.shtml	21177974(MI:0225(ChIP-chip) and ChIP-seq)	null	modENCODE-24-JAN-11	http://www.modencode.org/White.shtml	2014-10-01	pd
FBgn0261434	FBgn0010269	hkb	Dsor1	PDI: Transcription factor-Gene	0.3827	-	Dsor1	hkb	21177974	http://www.ncbi.nlm.nih.gov/sites/entrez?cmd=retrieve&db=pubmed&list_uids=21177974&dopt=DocSum	http://www.modencode.org/White.shtml	21177974(MI:0225(ChIP-chip) and ChIP-seq)	null	modENCODE-24-JAN-11	http://www.modencode.org/White.shtml	2014-10-01	pd
FBgn0261434	FBgn0036147	hkb	Plod	PDI: Transcription factor-Gene	0.0279	-	Plod	hkb	21177974	http://www.ncbi.nlm.nih.gov/sites/entrez?cmd=retrieve&db=pubmed&list_uids=21177974&dopt=DocSum	http://www.modencode.org/White.shtml	21177974(MI:0225(ChIP-chip) and ChIP-seq)	null	modENCODE-24-JAN-11	http://www.modencode.org/White.shtml	2014-10-01	pd
FBgn0261434	FBgn0250789	hkb	alpha-Spec	PDI: Transcription factor-Gene	0.2561	-	Œ±-Spec	hkb	21177974	http://www.ncbi.nlm.nih.gov/sites/entrez?cmd=retrieve&db=pubmed&list_uids=21177974&dopt=DocSum	http://www.modencode.org/White.shtml	21177974(MI:0225(ChIP-chip) and ChIP-seq)	null	modENCODE-24-JAN-11	http://www.modencode.org/White.shtml	2014-10-01	pd
FBgn0261434	FBgn0042693	hkb	wrd	PDI: Transcription factor-Gene	-0.2386	-	PP2A-B'	hkb	21177974	http://www.ncbi.nlm.nih.gov/sites/entrez?cmd=retrieve&db=pubmed&list_uids=21177974&dopt=DocSum	http://www.modencode.org/White.shtml	21177974(MI:0225(ChIP-chip) and ChIP-seq)	null	modENCODE-24-JAN-11	http://www.modencode.org/White.shtml	2014-10-01	pd
FBgn0261434	FBgn0085220	hkb	Ufm1	PDI: Transcription factor-Gene	-0.1873	-	CG34191	hkb	21177974	http://www.ncbi.nlm.nih.gov/sites/entrez?cmd=retrieve&db=pubmed&list_uids=21177974&dopt=DocSum	http://www.modencode.org/White.shtml	21177974(MI:0225(ChIP-chip) and ChIP-seq)	null	modENCODE-24-JAN-11	http://www.modencode.org/White.shtml	2014-10-01	pd
FBgn0261434	FBgn0010265	hkb	RpS13	PDI: Transcription factor-Gene	0.1301	-	RpS13	hkb	21177974	http://www.ncbi.nlm.nih.gov/sites/entrez?cmd=retrieve&db=pubmed&list_uids=21177974&dopt=DocSum	http://www.modencode.org/White.shtml	21177974(MI:0225(ChIP-chip) and ChIP-seq)	null	modENCODE-24-JAN-11	http://www.modencode.org/White.shtml	2014-10-01	pd
FBgn0261434	FBgn0030956	hkb	CG18259	PDI: Transcription factor-Gene	0.5672	-	CG18259	hkb	21177974	http://www.ncbi.nlm.nih.gov/sites/entrez?cmd=retrieve&db=pubmed&list_uids=21177974&dopt=DocSum	http://www.modencode.org/White.shtml	21177974(MI:0225(ChIP-chip) and ChIP-seq)	null	modENCODE-24-JAN-11	http://www.modencode.org/White.shtml	2014-10-01	pd
FBgn0261434	FBgn0043012	hkb	AP-2sigma	PDI: Transcription factor-Gene	0.4009	-	AP-2œÉ	hkb	21177974	http://www.ncbi.nlm.nih.gov/sites/entrez?cmd=retrieve&db=pubmed&list_uids=21177974&dopt=DocSum	http://www.modencode.org/White.shtml	21177974(MI:0225(ChIP-chip) and ChIP-seq)	null	modENCODE-24-JAN-11	http://www.modencode.org/White.shtml	2014-10-01	pd
FBgn0261434	FBgn0025360	hkb	Optix	PDI: Transcription factor-Gene	0.3363	-	Optix	hkb	21177974	http://www.ncbi.nlm.nih.gov/sites/entrez?cmd=retrieve&db=pubmed&list_uids=21177974&dopt=DocSum	http://www.modencode.org/White.shtml	21177974(MI:0225(ChIP-chip) and ChIP-seq)	null	modENCODE-24-JAN-11	http://www.modencode.org/White.shtml	2014-10-01	pd
FBgn0261434	FBgn0005636	hkb	nvy	PDI: Transcription factor-Gene	0.3133	-	nvy	hkb	21177974	http://www.ncbi.nlm.nih.gov/sites/entrez?cmd=retrieve&db=pubmed&list_uids=21177974&dopt=DocSum	http://www.modencode.org/White.shtml	21177974(MI:0225(ChIP-chip) and ChIP-seq)	null	modENCODE-24-JAN-11	http://www.modencode.org/White.shtml	2014-10-01	pd
FBgn0261434	FBgn0038150	hkb	yellow-e3	PDI: Transcription factor-Gene	0.6325	-	yellow-e3	hkb	21177974	http://www.ncbi.nlm.nih.gov/sites/entrez?cmd=retrieve&db=pubmed&list_uids=21177974&dopt=DocSum	http://www.modencode.org/White.shtml	21177974(MI:0225(ChIP-chip) and ChIP-seq)	null	modENCODE-24-JAN-11	http://www.modencode.org/White.shtml	2014-10-01	pd
FBgn0261434	FBgn0036773	hkb	CG13698	PDI: Transcription factor-Gene	-0.2201	-	CG13698	hkb	21177974	http://www.ncbi.nlm.nih.gov/sites/entrez?cmd=retrieve&db=pubmed&list_uids=21177974&dopt=DocSum	http://www.modencode.org/White.shtml	21177974(MI:0225(ChIP-chip) and ChIP-seq)	null	modENCODE-24-JAN-11	http://www.modencode.org/White.shtml	2014-10-01	pd
FBgn0261434	FBgn0036774	hkb	mRpS26	PDI: Transcription factor-Gene	0.0767	-	mRpS26	hkb	21177974	http://www.ncbi.nlm.nih.gov/sites/entrez?cmd=retrieve&db=pubmed&list_uids=21177974&dopt=DocSum	http://www.modencode.org/White.shtml	21177974(MI:0225(ChIP-chip) and ChIP-seq)	null	modENCODE-24-JAN-11	http://www.modencode.org/White.shtml	2014-10-01	pd
FBgn0261434	FBgn0037018	hkb	CG4042	PDI: Transcription factor-Gene	-0.0419	-	CG4042	hkb	21177974	http://www.ncbi.nlm.nih.gov/sites/entrez?cmd=retrieve&db=pubmed&list_uids=21177974&dopt=DocSum	http://www.modencode.org/White.shtml	21177974(MI:0225(ChIP-chip) and ChIP-seq)	null	modENCODE-24-JAN-11	http://www.modencode.org/White.shtml	2014-10-01	pd
FBgn0261434	FBgn0039013	hkb	CG4813	PDI: Transcription factor-Gene	0.527	-	CG4813	hkb	21177974	http://www.ncbi.nlm.nih.gov/sites/entrez?cmd=retrieve&db=pubmed&list_uids=21177974&dopt=DocSum	http://www.modencode.org/White.shtml	21177974(MI:0225(ChIP-chip) and ChIP-seq)	null	modENCODE-24-JAN-11	http://www.modencode.org/White.shtml	2014-10-01	pd
FBgn0261434	FBgn0033539	hkb	Git	PDI: Transcription factor-Gene	0.4598	-	Git	hkb	21177974	http://www.ncbi.nlm.nih.gov/sites/entrez?cmd=retrieve&db=pubmed&list_uids=21177974&dopt=DocSum	http://www.modencode.org/White.shtml	21177974(MI:0225(ChIP-chip) and ChIP-seq)	null	modENCODE-24-JAN-11	http://www.modencode.org/White.shtml	2014-10-01	pd
FBgn0261434	FBgn0037011	hkb	CG4858	PDI: Transcription factor-Gene	-0.1499	-	CG4858	hkb	21177974	http://www.ncbi.nlm.nih.gov/sites/entrez?cmd=retrieve&db=pubmed&list_uids=21177974&dopt=DocSum	http://www.modencode.org/White.shtml	21177974(MI:0225(ChIP-chip) and ChIP-seq)	null	modENCODE-24-JAN-11	http://www.modencode.org/White.shtml	2014-10-01	pd
FBgn0261434	FBgn0030412	hkb	Tomosyn	PDI: Transcription factor-Gene	-0.1901	-	Tomosyn	hkb	21177974	http://www.ncbi.nlm.nih.gov/sites/entrez?cmd=retrieve&db=pubmed&list_uids=21177974&dopt=DocSum	http://www.modencode.org/White.shtml	21177974(MI:0225(ChIP-chip) and ChIP-seq)	null	modENCODE-24-JAN-11	http://www.modencode.org/White.shtml	2014-10-01	pd
FBgn0261434	FBgn0037612	hkb	CG8112	PDI: Transcription factor-Gene	-0.2745	-	CG8112	hkb	21177974	http://www.ncbi.nlm.nih.gov/sites/entrez?cmd=retrieve&db=pubmed&list_uids=21177974&dopt=DocSum	http://www.modencode.org/White.shtml	21177974(MI:0225(ChIP-chip) and ChIP-seq)	null	modENCODE-24-JAN-11	http://www.modencode.org/White.shtml	2014-10-01	pd
FBgn0261434	FBgn0030418	hkb	CG4004	PDI: Transcription factor-Gene	0.7203	-	CG4004	hkb	21177974	http://www.ncbi.nlm.nih.gov/sites/entrez?cmd=retrieve&db=pubmed&list_uids=21177974&dopt=DocSum	http://www.modencode.org/White.shtml	21177974(MI:0225(ChIP-chip) and ChIP-seq)	null	modENCODE-24-JAN-11	http://www.modencode.org/White.shtml	2014-10-01	pd
FBgn0261434	FBgn0037010	hkb	CG4825	PDI: Transcription factor-Gene	0.1762	-	CG4825	hkb	21177974	http://www.ncbi.nlm.nih.gov/sites/entrez?cmd=retrieve&db=pubmed&list_uids=21177974&dopt=DocSum	http://www.modencode.org/White.shtml	21177974(MI:0225(ChIP-chip) and ChIP-seq)	null	modENCODE-24-JAN-11	http://www.modencode.org/White.shtml	2014-10-01	pd
FBgn0261434	FBgn0053288	hkb	CG33288	PDI: Transcription factor-Gene	-0.1622	-	CG33288	hkb	21177974	http://www.ncbi.nlm.nih.gov/sites/entrez?cmd=retrieve&db=pubmed&list_uids=21177974&dopt=DocSum	http://www.modencode.org/White.shtml	21177974(MI:0225(ChIP-chip) and ChIP-seq)	null	modENCODE-24-JAN-11	http://www.modencode.org/White.shtml	2014-10-01	pd
FBgn0261434	FBgn0085211	hkb	RpS28-like	PDI: Transcription factor-Gene	-0.2949	-	RpS28-like	hkb	21177974	http://www.ncbi.nlm.nih.gov/sites/entrez?cmd=retrieve&db=pubmed&list_uids=21177974&dopt=DocSum	http://www.modencode.org/White.shtml	21177974(MI:0225(ChIP-chip) and ChIP-seq)	null	modENCODE-24-JAN-11	http://www.modencode.org/White.shtml	2014-10-01	pd
FBgn0261434	FBgn0085212	hkb	CG34183	PDI: Transcription factor-Gene	0.457	-	CG34183	hkb	21177974	http://www.ncbi.nlm.nih.gov/sites/entrez?cmd=retrieve&db=pubmed&list_uids=21177974&dopt=DocSum	http://www.modencode.org/White.shtml	21177974(MI:0225(ChIP-chip) and ChIP-seq)	null	modENCODE-24-JAN-11	http://www.modencode.org/White.shtml	2014-10-01	pd
FBgn0261434	FBgn0038147	hkb	CCHa2	PDI: Transcription factor-Gene	-0.3435	-	CCHa2	hkb	21177974	http://www.ncbi.nlm.nih.gov/sites/entrez?cmd=retrieve&db=pubmed&list_uids=21177974&dopt=DocSum	http://www.modencode.org/White.shtml	21177974(MI:0225(ChIP-chip) and ChIP-seq)	null	modENCODE-24-JAN-11	http://www.modencode.org/White.shtml	2014-10-01	pd
FBgn0261434	FBgn0017577	hkb	Mcm5	PDI: Transcription factor-Gene	0.5955	-	Mcm5	hkb	21177974	http://www.ncbi.nlm.nih.gov/sites/entrez?cmd=retrieve&db=pubmed&list_uids=21177974&dopt=DocSum	http://www.modencode.org/White.shtml	21177974(MI:0225(ChIP-chip) and ChIP-seq)	null	modENCODE-24-JAN-11	http://www.modencode.org/White.shtml	2014-10-01	pd
FBgn0261434	FBgn0000308	hkb	chic	PDI: Transcription factor-Gene	-0.0603	-	chic	hkb	21177974	http://www.ncbi.nlm.nih.gov/sites/entrez?cmd=retrieve&db=pubmed&list_uids=21177974&dopt=DocSum	http://www.modencode.org/White.shtml	21177974(MI:0225(ChIP-chip) and ChIP-seq)	null	modENCODE-24-JAN-11	http://www.modencode.org/White.shtml	2014-10-01	pd
FBgn0261434	FBgn0030026	hkb	sni	PDI: Transcription factor-Gene	-0.3216	-	sni	hkb	21177974	http://www.ncbi.nlm.nih.gov/sites/entrez?cmd=retrieve&db=pubmed&list_uids=21177974&dopt=DocSum	http://www.modencode.org/White.shtml	21177974(MI:0225(ChIP-chip) and ChIP-seq)	null	modENCODE-24-JAN-11	http://www.modencode.org/White.shtml	2014-10-01	pd
FBgn0261434	FBgn0010408	hkb	RpS9	PDI: Transcription factor-Gene	0.4431	-	RpS9	hkb	21177974	http://www.ncbi.nlm.nih.gov/sites/entrez?cmd=retrieve&db=pubmed&list_uids=21177974&dopt=DocSum	http://www.modencode.org/White.shtml	21177974(MI:0225(ChIP-chip) and ChIP-seq)	null	modENCODE-24-JAN-11	http://www.modencode.org/White.shtml	2014-10-01	pd
FBgn0261434	FBgn0005640	hkb	Eip63E	PDI: Transcription factor-Gene	0.0051	-	Eip63E	hkb	21177974	http://www.ncbi.nlm.nih.gov/sites/entrez?cmd=retrieve&db=pubmed&list_uids=21177974&dopt=DocSum	http://www.modencode.org/White.shtml	21177974(MI:0225(ChIP-chip) and ChIP-seq)	null	modENCODE-24-JAN-11	http://www.modencode.org/White.shtml	2014-10-01	pd
FBgn0261434	FBgn0040534	hkb	Sf3b5	PDI: Transcription factor-Gene	0.7882	-	CG11985	hkb	21177974	http://www.ncbi.nlm.nih.gov/sites/entrez?cmd=retrieve&db=pubmed&list_uids=21177974&dopt=DocSum	http://www.modencode.org/White.shtml	21177974(MI:0225(ChIP-chip) and ChIP-seq)	null	modENCODE-24-JAN-11	http://www.modencode.org/White.shtml	2014-10-01	pd
FBgn0261434	FBgn0035995	hkb	CG3529	PDI: Transcription factor-Gene	-0.3927	-	CG3529	hkb	21177974	http://www.ncbi.nlm.nih.gov/sites/entrez?cmd=retrieve&db=pubmed&list_uids=21177974&dopt=DocSum	http://www.modencode.org/White.shtml	21177974(MI:0225(ChIP-chip) and ChIP-seq)	null	modENCODE-24-JAN-11	http://www.modencode.org/White.shtml	2014-10-01	pd
FBgn0261434	FBgn0037815	hkb	Rrp46	PDI: Transcription factor-Gene	0.4355	-	Rrp46	hkb	21177974	http://www.ncbi.nlm.nih.gov/sites/entrez?cmd=retrieve&db=pubmed&list_uids=21177974&dopt=DocSum	http://www.modencode.org/White.shtml	21177974(MI:0225(ChIP-chip) and ChIP-seq)	null	modENCODE-24-JAN-11	http://www.modencode.org/White.shtml	2014-10-01	pd
FBgn0261434	FBgn0027504	hkb	CG8878	PDI: Transcription factor-Gene	0.7827	-	CG8878	hkb	21177974	http://www.ncbi.nlm.nih.gov/sites/entrez?cmd=retrieve&db=pubmed&list_uids=21177974&dopt=DocSum	http://www.modencode.org/White.shtml	21177974(MI:0225(ChIP-chip) and ChIP-seq)	null	modENCODE-24-JAN-11	http://www.modencode.org/White.shtml	2014-10-01	pd
FBgn0261434	FBgn0024227	hkb	aurB	PDI: Transcription factor-Gene	0.8123	-	aurB	hkb	21177974	http://www.ncbi.nlm.nih.gov/sites/entrez?cmd=retrieve&db=pubmed&list_uids=21177974&dopt=DocSum	http://www.modencode.org/White.shtml	21177974(MI:0225(ChIP-chip) and ChIP-seq)	null	modENCODE-24-JAN-11	http://www.modencode.org/White.shtml	2014-10-01	pd
FBgn0261434	FBgn0020510	hkb	Abi	PDI: Transcription factor-Gene	0.5837	-	Abi	hkb	21177974	http://www.ncbi.nlm.nih.gov/sites/entrez?cmd=retrieve&db=pubmed&list_uids=21177974&dopt=DocSum	http://www.modencode.org/White.shtml	21177974(MI:0225(ChIP-chip) and ChIP-seq)	null	modENCODE-24-JAN-11	http://www.modencode.org/White.shtml	2014-10-01	pd
FBgn0261434	FBgn0052451	hkb	SPoCk	PDI: Transcription factor-Gene	0.3109	-	SPoCk	hkb	21177974	http://www.ncbi.nlm.nih.gov/sites/entrez?cmd=retrieve&db=pubmed&list_uids=21177974&dopt=DocSum	http://www.modencode.org/White.shtml	21177974(MI:0225(ChIP-chip) and ChIP-seq)	null	modENCODE-24-JAN-11	http://www.modencode.org/White.shtml	2014-10-01	pd
FBgn0261434	FBgn0024222	hkb	IKKbeta	PDI: Transcription factor-Gene	0.0828	-	IKKŒ≤	hkb	21177974	http://www.ncbi.nlm.nih.gov/sites/entrez?cmd=retrieve&db=pubmed&list_uids=21177974&dopt=DocSum	http://www.modencode.org/White.shtml	21177974(MI:0225(ChIP-chip) and ChIP-seq)	null	modENCODE-24-JAN-11	http://www.modencode.org/White.shtml	2014-10-01	pd
FBgn0261434	FBgn0035415	hkb	CG14966	PDI: Transcription factor-Gene	0.4816	-	CG14966	hkb	21177974	http://www.ncbi.nlm.nih.gov/sites/entrez?cmd=retrieve&db=pubmed&list_uids=21177974&dopt=DocSum	http://www.modencode.org/White.shtml	21177974(MI:0225(ChIP-chip) and ChIP-seq)	null	modENCODE-24-JAN-11	http://www.modencode.org/White.shtml	2014-10-01	pd
FBgn0261434	FBgn0035416	hkb	gry	PDI: Transcription factor-Gene	0.3055	-	gry	hkb	21177974	http://www.ncbi.nlm.nih.gov/sites/entrez?cmd=retrieve&db=pubmed&list_uids=21177974&dopt=DocSum	http://www.modencode.org/White.shtml	21177974(MI:0225(ChIP-chip) and ChIP-seq)	null	modENCODE-24-JAN-11	http://www.modencode.org/White.shtml	2014-10-01	pd
FBgn0261434	FBgn0032172	hkb	CG5850	PDI: Transcription factor-Gene	-0.0692	-	CG5850	hkb	21177974	http://www.ncbi.nlm.nih.gov/sites/entrez?cmd=retrieve&db=pubmed&list_uids=21177974&dopt=DocSum	http://www.modencode.org/White.shtml	21177974(MI:0225(ChIP-chip) and ChIP-seq)	null	modENCODE-24-JAN-11	http://www.modencode.org/White.shtml	2014-10-01	pd
FBgn0261434	FBgn0051907	hkb	CG31907	PDI: Transcription factor-Gene	-0.2179	-	CG31907	hkb	21177974	http://www.ncbi.nlm.nih.gov/sites/entrez?cmd=retrieve&db=pubmed&list_uids=21177974&dopt=DocSum	http://www.modencode.org/White.shtml	21177974(MI:0225(ChIP-chip) and ChIP-seq)	null	modENCODE-24-JAN-11	http://www.modencode.org/White.shtml	2014-10-01	pd
FBgn0261434	FBgn0261285	hkb	Ppcs	PDI: Transcription factor-Gene	-0.0951	-	Ppcs	hkb	21177974	http://www.ncbi.nlm.nih.gov/sites/entrez?cmd=retrieve&db=pubmed&list_uids=21177974&dopt=DocSum	http://www.modencode.org/White.shtml	21177974(MI:0225(ChIP-chip) and ChIP-seq)	null	modENCODE-24-JAN-11	http://www.modencode.org/White.shtml	2014-10-01	pd
FBgn0261434	FBgn0026250	hkb	eIF1A	PDI: Transcription factor-Gene	-0.3988	-	eIF-1A	hkb	21177974	http://www.ncbi.nlm.nih.gov/sites/entrez?cmd=retrieve&db=pubmed&list_uids=21177974&dopt=DocSum	http://www.modencode.org/White.shtml	21177974(MI:0225(ChIP-chip) and ChIP-seq)	null	modENCODE-24-JAN-11	http://www.modencode.org/White.shtml	2014-10-01	pd
FBgn0261434	FBgn0261479	hkb	nero	PDI: Transcription factor-Gene	0.0126	-	nero	hkb	21177974	http://www.ncbi.nlm.nih.gov/sites/entrez?cmd=retrieve&db=pubmed&list_uids=21177974&dopt=DocSum	http://www.modencode.org/White.shtml	21177974(MI:0225(ChIP-chip) and ChIP-seq)	null	modENCODE-24-JAN-11	http://www.modencode.org/White.shtml	2014-10-01	pd
FBgn0261434	FBgn0261284	hkb	bou	PDI: Transcription factor-Gene	0.2482	-	bou	hkb	21177974	http://www.ncbi.nlm.nih.gov/sites/entrez?cmd=retrieve&db=pubmed&list_uids=21177974&dopt=DocSum	http://www.modencode.org/White.shtml	21177974(MI:0225(ChIP-chip) and ChIP-seq)	null	modENCODE-24-JAN-11	http://www.modencode.org/White.shtml	2014-10-01	pd
FBgn0261434	FBgn0278604	hkb	dmt	PDI: Transcription factor-Gene	0.3845	-	dmt	hkb	21177974	http://www.ncbi.nlm.nih.gov/sites/entrez?cmd=retrieve&db=pubmed&list_uids=21177974&dopt=DocSum	http://www.modencode.org/White.shtml	21177974(MI:0225(ChIP-chip) and ChIP-seq)	null	modENCODE-24-JAN-11	http://www.modencode.org/White.shtml	2014-10-01	pd
FBgn0261434	FBgn0020503	hkb	CLIP-190	PDI: Transcription factor-Gene	-0.2722	-	CLIP-190	hkb	21177974	http://www.ncbi.nlm.nih.gov/sites/entrez?cmd=retrieve&db=pubmed&list_uids=21177974&dopt=DocSum	http://www.modencode.org/White.shtml	21177974(MI:0225(ChIP-chip) and ChIP-seq)	null	modENCODE-24-JAN-11	http://www.modencode.org/White.shtml	2014-10-01	pd
FBgn0261434	FBgn0026059	hkb	Mhcl	PDI: Transcription factor-Gene	-0.076	-	Mhcl	hkb	21177974	http://www.ncbi.nlm.nih.gov/sites/entrez?cmd=retrieve&db=pubmed&list_uids=21177974&dopt=DocSum	http://www.modencode.org/White.shtml	21177974(MI:0225(ChIP-chip) and ChIP-seq)	null	modENCODE-24-JAN-11	http://www.modencode.org/White.shtml	2014-10-01	pd
FBgn0261434	FBgn0052447	hkb	CG32447	PDI: Transcription factor-Gene	-0.0022	-	CG32447	hkb	21177974	http://www.ncbi.nlm.nih.gov/sites/entrez?cmd=retrieve&db=pubmed&list_uids=21177974&dopt=DocSum	http://www.modencode.org/White.shtml	21177974(MI:0225(ChIP-chip) and ChIP-seq)	null	modENCODE-24-JAN-11	http://www.modencode.org/White.shtml	2014-10-01	pd
FBgn0261434	FBgn0035023	hkb	ITP	PDI: Transcription factor-Gene	-0.1351	-	ITP	hkb	21177974	http://www.ncbi.nlm.nih.gov/sites/entrez?cmd=retrieve&db=pubmed&list_uids=21177974&dopt=DocSum	http://www.modencode.org/White.shtml	21177974(MI:0225(ChIP-chip) and ChIP-seq)	null	modENCODE-24-JAN-11	http://www.modencode.org/White.shtml	2014-10-01	pd
FBgn0261434	FBgn0052441	hkb	CG32441	PDI: Transcription factor-Gene	0.3178	-	CG32441	hkb	21177974	http://www.ncbi.nlm.nih.gov/sites/entrez?cmd=retrieve&db=pubmed&list_uids=21177974&dopt=DocSum	http://www.modencode.org/White.shtml	21177974(MI:0225(ChIP-chip) and ChIP-seq)	null	modENCODE-24-JAN-11	http://www.modencode.org/White.shtml	2014-10-01	pd
FBgn0261434	FBgn0037213	hkb	CG12581	PDI: Transcription factor-Gene	0.2995	-	CG12581	hkb	21177974	http://www.ncbi.nlm.nih.gov/sites/entrez?cmd=retrieve&db=pubmed&list_uids=21177974&dopt=DocSum	http://www.modencode.org/White.shtml	21177974(MI:0225(ChIP-chip) and ChIP-seq)	null	modENCODE-24-JAN-11	http://www.modencode.org/White.shtml	2014-10-01	pd
FBgn0261434	FBgn0032169	hkb	CG4709	PDI: Transcription factor-Gene	0.6763	-	CG4709	hkb	21177974	http://www.ncbi.nlm.nih.gov/sites/entrez?cmd=retrieve&db=pubmed&list_uids=21177974&dopt=DocSum	http://www.modencode.org/White.shtml	21177974(MI:0225(ChIP-chip) and ChIP-seq)	null	modENCODE-24-JAN-11	http://www.modencode.org/White.shtml	2014-10-01	pd
FBgn0261434	FBgn0261270	hkb	SelD	PDI: Transcription factor-Gene	0.6312	-	SelD	hkb	21177974	http://www.ncbi.nlm.nih.gov/sites/entrez?cmd=retrieve&db=pubmed&list_uids=21177974&dopt=DocSum	http://www.modencode.org/White.shtml	21177974(MI:0225(ChIP-chip) and ChIP-seq)	null	modENCODE-24-JAN-11	http://www.modencode.org/White.shtml	2014-10-01	pd
FBgn0261434	FBgn0032168	hkb	CG13126	PDI: Transcription factor-Gene	0.2258	-	CG13126	hkb	21177974	http://www.ncbi.nlm.nih.gov/sites/entrez?cmd=retrieve&db=pubmed&list_uids=21177974&dopt=DocSum	http://www.modencode.org/White.shtml	21177974(MI:0225(ChIP-chip) and ChIP-seq)	null	modENCODE-24-JAN-11	http://www.modencode.org/White.shtml	2014-10-01	pd
FBgn0261434	FBgn0015600	hkb	toc	PDI: Transcription factor-Gene	-0.0422	-	toc	hkb	21177974	http://www.ncbi.nlm.nih.gov/sites/entrez?cmd=retrieve&db=pubmed&list_uids=21177974&dopt=DocSum	http://www.modencode.org/White.shtml	21177974(MI:0225(ChIP-chip) and ChIP-seq)	null	modENCODE-24-JAN-11	http://www.modencode.org/White.shtml	2014-10-01	pd
FBgn0261434	FBgn0035424	hkb	Larp4B	PDI: Transcription factor-Gene	-0.1732	-	CG11505	hkb	21177974	http://www.ncbi.nlm.nih.gov/sites/entrez?cmd=retrieve&db=pubmed&list_uids=21177974&dopt=DocSum	http://www.modencode.org/White.shtml	21177974(MI:0225(ChIP-chip) and ChIP-seq)	null	modENCODE-24-JAN-11	http://www.modencode.org/White.shtml	2014-10-01	pd
FBgn0261434	FBgn0035425	hkb	CG17746	PDI: Transcription factor-Gene	-0.0107	-	CG17746	hkb	21177974	http://www.ncbi.nlm.nih.gov/sites/entrez?cmd=retrieve&db=pubmed&list_uids=21177974&dopt=DocSum	http://www.modencode.org/White.shtml	21177974(MI:0225(ChIP-chip) and ChIP-seq)	null	modENCODE-24-JAN-11	http://www.modencode.org/White.shtml	2014-10-01	pd
FBgn0261434	FBgn0024230	hkb	Hs2st	PDI: Transcription factor-Gene	-0.4028	-	Hs2st	hkb	21177974	http://www.ncbi.nlm.nih.gov/sites/entrez?cmd=retrieve&db=pubmed&list_uids=21177974&dopt=DocSum	http://www.modencode.org/White.shtml	21177974(MI:0225(ChIP-chip) and ChIP-seq)	null	modENCODE-24-JAN-11	http://www.modencode.org/White.shtml	2014-10-01	pd
FBgn0261434	FBgn0261279	hkb	lqfR	PDI: Transcription factor-Gene	-0.2294	-	lqfR	hkb	21177974	http://www.ncbi.nlm.nih.gov/sites/entrez?cmd=retrieve&db=pubmed&list_uids=21177974&dopt=DocSum	http://www.modencode.org/White.shtml	21177974(MI:0225(ChIP-chip) and ChIP-seq)	null	modENCODE-24-JAN-11	http://www.modencode.org/White.shtml	2014-10-01	pd
FBgn0261434	FBgn0264855	hkb	AP-2alpha	PDI: Transcription factor-Gene	0.2351	-	AP-2Œ±	hkb	21177974	http://www.ncbi.nlm.nih.gov/sites/entrez?cmd=retrieve&db=pubmed&list_uids=21177974&dopt=DocSum	http://www.modencode.org/White.shtml	21177974(MI:0225(ChIP-chip) and ChIP-seq)	null	modENCODE-24-JAN-11	http://www.modencode.org/White.shtml	2014-10-01	pd
FBgn0261434	FBgn0035299	hkb	CG11815	PDI: Transcription factor-Gene	-0.2143	-	CG11815	hkb	21177974	http://www.ncbi.nlm.nih.gov/sites/entrez?cmd=retrieve&db=pubmed&list_uids=21177974&dopt=DocSum	http://www.modencode.org/White.shtml	21177974(MI:0225(ChIP-chip) and ChIP-seq)	null	modENCODE-24-JAN-11	http://www.modencode.org/White.shtml	2014-10-01	pd
FBgn0261434	FBgn0053977	hkb	CG33977	PDI: Transcription factor-Gene	-0.0583	-	CG33977	hkb	21177974	http://www.ncbi.nlm.nih.gov/sites/entrez?cmd=retrieve&db=pubmed&list_uids=21177974&dopt=DocSum	http://www.modencode.org/White.shtml	21177974(MI:0225(ChIP-chip) and ChIP-seq)	null	modENCODE-24-JAN-11	http://www.modencode.org/White.shtml	2014-10-01	pd
FBgn0261434	FBgn0039554	hkb	CG5003	PDI: Transcription factor-Gene	0.6377	-	CG5003	hkb	21177974	http://www.ncbi.nlm.nih.gov/sites/entrez?cmd=retrieve&db=pubmed&list_uids=21177974&dopt=DocSum	http://www.modencode.org/White.shtml	21177974(MI:0225(ChIP-chip) and ChIP-seq)	null	modENCODE-24-JAN-11	http://www.modencode.org/White.shtml	2014-10-01	pd
FBgn0261434	FBgn0034172	hkb	CG6665	PDI: Transcription factor-Gene	0.3017	-	CG6665	hkb	21177974	http://www.ncbi.nlm.nih.gov/sites/entrez?cmd=retrieve&db=pubmed&list_uids=21177974&dopt=DocSum	http://www.modencode.org/White.shtml	21177974(MI:0225(ChIP-chip) and ChIP-seq)	null	modENCODE-24-JAN-11	http://www.modencode.org/White.shtml	2014-10-01	pd
FBgn0261434	FBgn0261269	hkb	conv	PDI: Transcription factor-Gene	-0.0302	-	conv	hkb	21177974	http://www.ncbi.nlm.nih.gov/sites/entrez?cmd=retrieve&db=pubmed&list_uids=21177974&dopt=DocSum	http://www.modencode.org/White.shtml	21177974(MI:0225(ChIP-chip) and ChIP-seq)	null	modENCODE-24-JAN-11	http://www.modencode.org/White.shtml	2014-10-01	pd
FBgn0261434	FBgn0004435	hkb	Galphaq	PDI: Transcription factor-Gene	-0.1812	-	GŒ±q	hkb	21177974	http://www.ncbi.nlm.nih.gov/sites/entrez?cmd=retrieve&db=pubmed&list_uids=21177974&dopt=DocSum	http://www.modencode.org/White.shtml	21177974(MI:0225(ChIP-chip) and ChIP-seq)	null	modENCODE-24-JAN-11	http://www.modencode.org/White.shtml	2014-10-01	pd
FBgn0261434	FBgn0050421	hkb	Usp15-31	PDI: Transcription factor-Gene	0.1451	-	Usp15-31	hkb	21177974	http://www.ncbi.nlm.nih.gov/sites/entrez?cmd=retrieve&db=pubmed&list_uids=21177974&dopt=DocSum	http://www.modencode.org/White.shtml	21177974(MI:0225(ChIP-chip) and ChIP-seq)	null	modENCODE-24-JAN-11	http://www.modencode.org/White.shtml	2014-10-01	pd
FBgn0261434	FBgn0086357	hkb	Sec61alpha	PDI: Transcription factor-Gene	0.0558	-	Sec61Œ±	hkb	21177974	http://www.ncbi.nlm.nih.gov/sites/entrez?cmd=retrieve&db=pubmed&list_uids=21177974&dopt=DocSum	http://www.modencode.org/White.shtml	21177974(MI:0225(ChIP-chip) and ChIP-seq)	null	modENCODE-24-JAN-11	http://www.modencode.org/White.shtml	2014-10-01	pd
FBgn0261434	FBgn0052438	hkb	SMC5	PDI: Transcription factor-Gene	0.6177	-	SMC5	hkb	21177974	http://www.ncbi.nlm.nih.gov/sites/entrez?cmd=retrieve&db=pubmed&list_uids=21177974&dopt=DocSum	http://www.modencode.org/White.shtml	21177974(MI:0225(ChIP-chip) and ChIP-seq)	null	modENCODE-24-JAN-11	http://www.modencode.org/White.shtml	2014-10-01	pd
FBgn0261434	FBgn0032805	hkb	CG10337	PDI: Transcription factor-Gene	-0.3142	-	CG10337	hkb	21177974	http://www.ncbi.nlm.nih.gov/sites/entrez?cmd=retrieve&db=pubmed&list_uids=21177974&dopt=DocSum	http://www.modencode.org/White.shtml	21177974(MI:0225(ChIP-chip) and ChIP-seq)	null	modENCODE-24-JAN-11	http://www.modencode.org/White.shtml	2014-10-01	pd
FBgn0261434	FBgn0034179	hkb	CG6805	PDI: Transcription factor-Gene	0.0565	-	CG6805	hkb	21177974	http://www.ncbi.nlm.nih.gov/sites/entrez?cmd=retrieve&db=pubmed&list_uids=21177974&dopt=DocSum	http://www.modencode.org/White.shtml	21177974(MI:0225(ChIP-chip) and ChIP-seq)	null	modENCODE-24-JAN-11	http://www.modencode.org/White.shtml	2014-10-01	pd
FBgn0261434	FBgn0263396	hkb	sqd	PDI: Transcription factor-Gene	0.3735	-	sqd	hkb	21177974	http://www.ncbi.nlm.nih.gov/sites/entrez?cmd=retrieve&db=pubmed&list_uids=21177974&dopt=DocSum	http://www.modencode.org/White.shtml	21177974(MI:0225(ChIP-chip) and ChIP-seq)	null	modENCODE-24-JAN-11	http://www.modencode.org/White.shtml	2014-10-01	pd
FBgn0261434	FBgn0263398	hkb	Uck	PDI: Transcription factor-Gene	0.0559	-	CG6364	hkb	21177974	http://www.ncbi.nlm.nih.gov/sites/entrez?cmd=retrieve&db=pubmed&list_uids=21177974&dopt=DocSum	http://www.modencode.org/White.shtml	21177974(MI:0225(ChIP-chip) and ChIP-seq)	null	modENCODE-24-JAN-11	http://www.modencode.org/White.shtml	2014-10-01	pd
FBgn0261434	FBgn0028394	hkb	CG17834	PDI: Transcription factor-Gene	-0.391	-	CG17834	hkb	21177974	http://www.ncbi.nlm.nih.gov/sites/entrez?cmd=retrieve&db=pubmed&list_uids=21177974&dopt=DocSum	http://www.modencode.org/White.shtml	21177974(MI:0225(ChIP-chip) and ChIP-seq)	null	modENCODE-24-JAN-11	http://www.modencode.org/White.shtml	2014-10-01	pd
FBgn0261434	FBgn0025777	hkb	homer	PDI: Transcription factor-Gene	0.4497	-	homer	hkb	21177974	http://www.ncbi.nlm.nih.gov/sites/entrez?cmd=retrieve&db=pubmed&list_uids=21177974&dopt=DocSum	http://www.modencode.org/White.shtml	21177974(MI:0225(ChIP-chip) and ChIP-seq)	null	modENCODE-24-JAN-11	http://www.modencode.org/White.shtml	2014-10-01	pd
FBgn0261434	FBgn0027529	hkb	tapas	PDI: Transcription factor-Gene	-0.5287	-	CG8920	hkb	21177974	http://www.ncbi.nlm.nih.gov/sites/entrez?cmd=retrieve&db=pubmed&list_uids=21177974&dopt=DocSum	http://www.modencode.org/White.shtml	21177974(MI:0225(ChIP-chip) and ChIP-seq)	null	modENCODE-24-JAN-11	http://www.modencode.org/White.shtml	2014-10-01	pd
FBgn0261434	FBgn0036816	hkb	Indy	PDI: Transcription factor-Gene	-0.096	-	Indy	hkb	21177974	http://www.ncbi.nlm.nih.gov/sites/entrez?cmd=retrieve&db=pubmed&list_uids=21177974&dopt=DocSum	http://www.modencode.org/White.shtml	21177974(MI:0225(ChIP-chip) and ChIP-seq)	null	modENCODE-24-JAN-11	http://www.modencode.org/White.shtml	2014-10-01	pd
FBgn0261434	FBgn0027528	hkb	goe	PDI: Transcription factor-Gene	0.3968	-	goe	hkb	21177974	http://www.ncbi.nlm.nih.gov/sites/entrez?cmd=retrieve&db=pubmed&list_uids=21177974&dopt=DocSum	http://www.modencode.org/White.shtml	21177974(MI:0225(ChIP-chip) and ChIP-seq)	null	modENCODE-24-JAN-11	http://www.modencode.org/White.shtml	2014-10-01	pd
FBgn0261434	FBgn0261458	hkb	capt	PDI: Transcription factor-Gene	0.3073	-	capt	hkb	21177974	http://www.ncbi.nlm.nih.gov/sites/entrez?cmd=retrieve&db=pubmed&list_uids=21177974&dopt=DocSum	http://www.modencode.org/White.shtml	21177974(MI:0225(ChIP-chip) and ChIP-seq)	null	modENCODE-24-JAN-11	http://www.modencode.org/White.shtml	2014-10-01	pd
FBgn0261434	FBgn0263391	hkb	hts	PDI: Transcription factor-Gene	0.0572	-	hts	hkb	21177974	http://www.ncbi.nlm.nih.gov/sites/entrez?cmd=retrieve&db=pubmed&list_uids=21177974&dopt=DocSum	http://www.modencode.org/White.shtml	21177974(MI:0225(ChIP-chip) and ChIP-seq)	null	modENCODE-24-JAN-11	http://www.modencode.org/White.shtml	2014-10-01	pd
FBgn0261434	FBgn0040929	hkb	CG12659	PDI: Transcription factor-Gene	0.6483	-	CG12659	hkb	21177974	http://www.ncbi.nlm.nih.gov/sites/entrez?cmd=retrieve&db=pubmed&list_uids=21177974&dopt=DocSum	http://www.modencode.org/White.shtml	21177974(MI:0225(ChIP-chip) and ChIP-seq)	null	modENCODE-24-JAN-11	http://www.modencode.org/White.shtml	2014-10-01	pd
FBgn0261434	FBgn0034142	hkb	CG8306	PDI: Transcription factor-Gene	-0.0448	-	CG8306	hkb	21177974	http://www.ncbi.nlm.nih.gov/sites/entrez?cmd=retrieve&db=pubmed&list_uids=21177974&dopt=DocSum	http://www.modencode.org/White.shtml	21177974(MI:0225(ChIP-chip) and ChIP-seq)	null	modENCODE-24-JAN-11	http://www.modencode.org/White.shtml	2014-10-01	pd
FBgn0261434	FBgn0037443	hkb	Dmtn	PDI: Transcription factor-Gene	0.0966	-	Dmtn	hkb	21177974	http://www.ncbi.nlm.nih.gov/sites/entrez?cmd=retrieve&db=pubmed&list_uids=21177974&dopt=DocSum	http://www.modencode.org/White.shtml	21177974(MI:0225(ChIP-chip) and ChIP-seq)	null	modENCODE-24-JAN-11	http://www.modencode.org/White.shtml	2014-10-01	pd
FBgn0261434	FBgn0030847	hkb	CG12991	PDI: Transcription factor-Gene	-0.2465	-	CG12991	hkb	21177974	http://www.ncbi.nlm.nih.gov/sites/entrez?cmd=retrieve&db=pubmed&list_uids=21177974&dopt=DocSum	http://www.modencode.org/White.shtml	21177974(MI:0225(ChIP-chip) and ChIP-seq)	null	modENCODE-24-JAN-11	http://www.modencode.org/White.shtml	2014-10-01	pd
FBgn0261434	FBgn0264270	hkb	Sxl	PDI: Transcription factor-Gene	0.7742	-	Sxl	hkb	21177974	http://www.ncbi.nlm.nih.gov/sites/entrez?cmd=retrieve&db=pubmed&list_uids=21177974&dopt=DocSum	http://www.modencode.org/White.shtml	21177974(MI:0225(ChIP-chip) and ChIP-seq)	null	modENCODE-24-JAN-11	http://www.modencode.org/White.shtml	2014-10-01	pd
FBgn0261434	FBgn0053995	hkb	CG33995	PDI: Transcription factor-Gene	-0.4035	-	CG33995	hkb	21177974	http://www.ncbi.nlm.nih.gov/sites/entrez?cmd=retrieve&db=pubmed&list_uids=21177974&dopt=DocSum	http://www.modencode.org/White.shtml	21177974(MI:0225(ChIP-chip) and ChIP-seq)	null	modENCODE-24-JAN-11	http://www.modencode.org/White.shtml	2014-10-01	pd
FBgn0261434	FBgn0034976	hkb	CG4049	PDI: Transcription factor-Gene	0.532	-	CG4049	hkb	21177974	http://www.ncbi.nlm.nih.gov/sites/entrez?cmd=retrieve&db=pubmed&list_uids=21177974&dopt=DocSum	http://www.modencode.org/White.shtml	21177974(MI:0225(ChIP-chip) and ChIP-seq)	null	modENCODE-24-JAN-11	http://www.modencode.org/White.shtml	2014-10-01	pd
FBgn0261434	FBgn0035001	hkb	Slik	PDI: Transcription factor-Gene	0.6851	-	Slik	hkb	21177974	http://www.ncbi.nlm.nih.gov/sites/entrez?cmd=retrieve&db=pubmed&list_uids=21177974&dopt=DocSum	http://www.modencode.org/White.shtml	21177974(MI:0225(ChIP-chip) and ChIP-seq)	null	modENCODE-24-JAN-11	http://www.modencode.org/White.shtml	2014-10-01	pd
FBgn0261434	FBgn0032813	hkb	PCNA2	PDI: Transcription factor-Gene	0.008	-	CG10262	hkb	21177974	http://www.ncbi.nlm.nih.gov/sites/entrez?cmd=retrieve&db=pubmed&list_uids=21177974&dopt=DocSum	http://www.modencode.org/White.shtml	21177974(MI:0225(ChIP-chip) and ChIP-seq)	null	modENCODE-24-JAN-11	http://www.modencode.org/White.shtml	2014-10-01	pd
FBgn0261434	FBgn0002306	hkb	sas	PDI: Transcription factor-Gene	-0.128	-	sas	hkb	21177974	http://www.ncbi.nlm.nih.gov/sites/entrez?cmd=retrieve&db=pubmed&list_uids=21177974&dopt=DocSum	http://www.modencode.org/White.shtml	21177974(MI:0225(ChIP-chip) and ChIP-seq)	null	modENCODE-24-JAN-11	http://www.modencode.org/White.shtml	2014-10-01	pd
FBgn0261434	FBgn0032814	hkb	CG10366	PDI: Transcription factor-Gene	0.294	-	CG10366	hkb	21177974	http://www.ncbi.nlm.nih.gov/sites/entrez?cmd=retrieve&db=pubmed&list_uids=21177974&dopt=DocSum	http://www.modencode.org/White.shtml	21177974(MI:0225(ChIP-chip) and ChIP-seq)	null	modENCODE-24-JAN-11	http://www.modencode.org/White.shtml	2014-10-01	pd
FBgn0261434	FBgn0036820	hkb	Grx1	PDI: Transcription factor-Gene	-0.4762	-	CG6852	hkb	21177974	http://www.ncbi.nlm.nih.gov/sites/entrez?cmd=retrieve&db=pubmed&list_uids=21177974&dopt=DocSum	http://www.modencode.org/White.shtml	21177974(MI:0225(ChIP-chip) and ChIP-seq)	null	modENCODE-24-JAN-11	http://www.modencode.org/White.shtml	2014-10-01	pd
FBgn0261434	FBgn0034959	hkb	CG11388	PDI: Transcription factor-Gene	0.0633	-	CG11388	hkb	21177974	http://www.ncbi.nlm.nih.gov/sites/entrez?cmd=retrieve&db=pubmed&list_uids=21177974&dopt=DocSum	http://www.modencode.org/White.shtml	21177974(MI:0225(ChIP-chip) and ChIP-seq)	null	modENCODE-24-JAN-11	http://www.modencode.org/White.shtml	2014-10-01	pd
FBgn0261434	FBgn0035402	hkb	Usp5	PDI: Transcription factor-Gene	0.0822	-	Usp5	hkb	21177974	http://www.ncbi.nlm.nih.gov/sites/entrez?cmd=retrieve&db=pubmed&list_uids=21177974&dopt=DocSum	http://www.modencode.org/White.shtml	21177974(MI:0225(ChIP-chip) and ChIP-seq)	null	modENCODE-24-JAN-11	http://www.modencode.org/White.shtml	2014-10-01	pd
FBgn0261434	FBgn0051935	hkb	CG31935	PDI: Transcription factor-Gene	-0.1768	-	CG31935	hkb	21177974	http://www.ncbi.nlm.nih.gov/sites/entrez?cmd=retrieve&db=pubmed&list_uids=21177974&dopt=DocSum	http://www.modencode.org/White.shtml	21177974(MI:0225(ChIP-chip) and ChIP-seq)	null	modENCODE-24-JAN-11	http://www.modencode.org/White.shtml	2014-10-01	pd
FBgn0261434	FBgn0023521	hkb	CG3587	PDI: Transcription factor-Gene	0.2648	-	CG3587	hkb	21177974	http://www.ncbi.nlm.nih.gov/sites/entrez?cmd=retrieve&db=pubmed&list_uids=21177974&dopt=DocSum	http://www.modencode.org/White.shtml	21177974(MI:0225(ChIP-chip) and ChIP-seq)	null	modENCODE-24-JAN-11	http://www.modencode.org/White.shtml	2014-10-01	pd
FBgn0261434	FBgn0034958	hkb	CG3907	PDI: Transcription factor-Gene	-0.0253	-	CG3907	hkb	21177974	http://www.ncbi.nlm.nih.gov/sites/entrez?cmd=retrieve&db=pubmed&list_uids=21177974&dopt=DocSum	http://www.modencode.org/White.shtml	21177974(MI:0225(ChIP-chip) and ChIP-seq)	null	modENCODE-24-JAN-11	http://www.modencode.org/White.shtml	2014-10-01	pd
FBgn0261434	FBgn0023520	hkb	CG3857	PDI: Transcription factor-Gene	0.5187	-	CG3857	hkb	21177974	http://www.ncbi.nlm.nih.gov/sites/entrez?cmd=retrieve&db=pubmed&list_uids=21177974&dopt=DocSum	http://www.modencode.org/White.shtml	21177974(MI:0225(ChIP-chip) and ChIP-seq)	null	modENCODE-24-JAN-11	http://www.modencode.org/White.shtml	2014-10-01	pd
FBgn0261434	FBgn0261445	hkb	sgl	PDI: Transcription factor-Gene	0.074	-	sgl	hkb	21177974	http://www.ncbi.nlm.nih.gov/sites/entrez?cmd=retrieve&db=pubmed&list_uids=21177974&dopt=DocSum	http://www.modencode.org/White.shtml	21177974(MI:0225(ChIP-chip) and ChIP-seq)	null	modENCODE-24-JAN-11	http://www.modencode.org/White.shtml	2014-10-01	pd
FBgn0261434	FBgn0026261	hkb	bonsai	PDI: Transcription factor-Gene	0.1732	-	bonsai	hkb	21177974	http://www.ncbi.nlm.nih.gov/sites/entrez?cmd=retrieve&db=pubmed&list_uids=21177974&dopt=DocSum	http://www.modencode.org/White.shtml	21177974(MI:0225(ChIP-chip) and ChIP-seq)	null	modENCODE-24-JAN-11	http://www.modencode.org/White.shtml	2014-10-01	pd
FBgn0261434	FBgn0026060	hkb	Mipp2	PDI: Transcription factor-Gene	0.3041	-	Mipp2	hkb	21177974	http://www.ncbi.nlm.nih.gov/sites/entrez?cmd=retrieve&db=pubmed&list_uids=21177974&dopt=DocSum	http://www.modencode.org/White.shtml	21177974(MI:0225(ChIP-chip) and ChIP-seq)	null	modENCODE-24-JAN-11	http://www.modencode.org/White.shtml	2014-10-01	pd
FBgn0261434	FBgn0016081	hkb	fry	PDI: Transcription factor-Gene	-0.0669	-	fry	hkb	21177974	http://www.ncbi.nlm.nih.gov/sites/entrez?cmd=retrieve&db=pubmed&list_uids=21177974&dopt=DocSum	http://www.modencode.org/White.shtml	21177974(MI:0225(ChIP-chip) and ChIP-seq)	null	modENCODE-24-JAN-11	http://www.modencode.org/White.shtml	2014-10-01	pd
FBgn0261434	FBgn0039379	hkb	CG5886	PDI: Transcription factor-Gene	-0.0742	-	CG5886	hkb	21177974	http://www.ncbi.nlm.nih.gov/sites/entrez?cmd=retrieve&db=pubmed&list_uids=21177974&dopt=DocSum	http://www.modencode.org/White.shtml	21177974(MI:0225(ChIP-chip) and ChIP-seq)	null	modENCODE-24-JAN-11	http://www.modencode.org/White.shtml	2014-10-01	pd
FBgn0261434	FBgn0040918	hkb	schlank	PDI: Transcription factor-Gene	0.022	-	schlank	hkb	21177974	http://www.ncbi.nlm.nih.gov/sites/entrez?cmd=retrieve&db=pubmed&list_uids=21177974&dopt=DocSum	http://www.modencode.org/White.shtml	21177974(MI:0225(ChIP-chip) and ChIP-seq)	null	modENCODE-24-JAN-11	http://www.modencode.org/White.shtml	2014-10-01	pd
FBgn0261434	FBgn0004456	hkb	mew	PDI: Transcription factor-Gene	0.2852	-	mew	hkb	21177974	http://www.ncbi.nlm.nih.gov/sites/entrez?cmd=retrieve&db=pubmed&list_uids=21177974&dopt=DocSum	http://www.modencode.org/White.shtml	21177974(MI:0225(ChIP-chip) and ChIP-seq)	null	modENCODE-24-JAN-11	http://www.modencode.org/White.shtml	2014-10-01	pd
FBgn0261434	FBgn0264078	hkb	Flo2	PDI: Transcription factor-Gene	0.2227	-	Flo2	hkb	21177974	http://www.ncbi.nlm.nih.gov/sites/entrez?cmd=retrieve&db=pubmed&list_uids=21177974&dopt=DocSum	http://www.modencode.org/White.shtml	21177974(MI:0225(ChIP-chip) and ChIP-seq)	null	modENCODE-24-JAN-11	http://www.modencode.org/White.shtml	2014-10-01	pd
FBgn0261434	FBgn0034962	hkb	MAN1	PDI: Transcription factor-Gene	0.319	-	MAN1	hkb	21177974	http://www.ncbi.nlm.nih.gov/sites/entrez?cmd=retrieve&db=pubmed&list_uids=21177974&dopt=DocSum	http://www.modencode.org/White.shtml	21177974(MI:0225(ChIP-chip) and ChIP-seq)	null	modENCODE-24-JAN-11	http://www.modencode.org/White.shtml	2014-10-01	pd
FBgn0261434	FBgn0030838	hkb	CG5445	PDI: Transcription factor-Gene	0.4194	-	CG5445	hkb	21177974	http://www.ncbi.nlm.nih.gov/sites/entrez?cmd=retrieve&db=pubmed&list_uids=21177974&dopt=DocSum	http://www.modencode.org/White.shtml	21177974(MI:0225(ChIP-chip) and ChIP-seq)	null	modENCODE-24-JAN-11	http://www.modencode.org/White.shtml	2014-10-01	pd
FBgn0261434	FBgn0030973	hkb	CG7332	PDI: Transcription factor-Gene	0.1924	-	CG7332	hkb	21177974	http://www.ncbi.nlm.nih.gov/sites/entrez?cmd=retrieve&db=pubmed&list_uids=21177974&dopt=DocSum	http://www.modencode.org/White.shtml	21177974(MI:0225(ChIP-chip) and ChIP-seq)	null	modENCODE-24-JAN-11	http://www.modencode.org/White.shtml	2014-10-01	pd
FBgn0261434	FBgn0027508	hkb	Tnks	PDI: Transcription factor-Gene	0.4897	-	Tnks	hkb	21177974	http://www.ncbi.nlm.nih.gov/sites/entrez?cmd=retrieve&db=pubmed&list_uids=21177974&dopt=DocSum	http://www.modencode.org/White.shtml	21177974(MI:0225(ChIP-chip) and ChIP-seq)	null	modENCODE-24-JAN-11	http://www.modencode.org/White.shtml	2014-10-01	pd
FBgn0261434	FBgn0034965	hkb	ppk29	PDI: Transcription factor-Gene	0.0632	-	ppk29	hkb	21177974	http://www.ncbi.nlm.nih.gov/sites/entrez?cmd=retrieve&db=pubmed&list_uids=21177974&dopt=DocSum	http://www.modencode.org/White.shtml	21177974(MI:0225(ChIP-chip) and ChIP-seq)	null	modENCODE-24-JAN-11	http://www.modencode.org/White.shtml	2014-10-01	pd
FBgn0261434	FBgn0032821	hkb	CdGAPr	PDI: Transcription factor-Gene	0.7338	-	CdGAPr	hkb	21177974	http://www.ncbi.nlm.nih.gov/sites/entrez?cmd=retrieve&db=pubmed&list_uids=21177974&dopt=DocSum	http://www.modencode.org/White.shtml	21177974(MI:0225(ChIP-chip) and ChIP-seq)	null	modENCODE-24-JAN-11	http://www.modencode.org/White.shtml	2014-10-01	pd
FBgn0261434	FBgn0032633	hkb	Lrch	PDI: Transcription factor-Gene	0.7375	-	Lrch	hkb	21177974	http://www.ncbi.nlm.nih.gov/sites/entrez?cmd=retrieve&db=pubmed&list_uids=21177974&dopt=DocSum	http://www.modencode.org/White.shtml	21177974(MI:0225(ChIP-chip) and ChIP-seq)	null	modENCODE-24-JAN-11	http://www.modencode.org/White.shtml	2014-10-01	pd
FBgn0261434	FBgn0053170	hkb	CG33170	PDI: Transcription factor-Gene	-0.0238	-	CG33170	hkb	21177974	http://www.ncbi.nlm.nih.gov/sites/entrez?cmd=retrieve&db=pubmed&list_uids=21177974&dopt=DocSum	http://www.modencode.org/White.shtml	21177974(MI:0225(ChIP-chip) and ChIP-seq)	null	modENCODE-24-JAN-11	http://www.modencode.org/White.shtml	2014-10-01	pd
FBgn0261434	FBgn0266720	hkb	Snap24	PDI: Transcription factor-Gene	0.212	-	Snap24	hkb	21177974	http://www.ncbi.nlm.nih.gov/sites/entrez?cmd=retrieve&db=pubmed&list_uids=21177974&dopt=DocSum	http://www.modencode.org/White.shtml	21177974(MI:0225(ChIP-chip) and ChIP-seq)	null	modENCODE-24-JAN-11	http://www.modencode.org/White.shtml	2014-10-01	pd
FBgn0261434	FBgn0035825	hkb	CG8111	PDI: Transcription factor-Gene	-0.1568	-	CG8111	hkb	21177974	http://www.ncbi.nlm.nih.gov/sites/entrez?cmd=retrieve&db=pubmed&list_uids=21177974&dopt=DocSum	http://www.modencode.org/White.shtml	21177974(MI:0225(ChIP-chip) and ChIP-seq)	null	modENCODE-24-JAN-11	http://www.modencode.org/White.shtml	2014-10-01	pd
FBgn0261434	FBgn0016070	hkb	smg	PDI: Transcription factor-Gene	0.2105	-	smg	hkb	21177974	http://www.ncbi.nlm.nih.gov/sites/entrez?cmd=retrieve&db=pubmed&list_uids=21177974&dopt=DocSum	http://www.modencode.org/White.shtml	21177974(MI:0225(ChIP-chip) and ChIP-seq)	null	modENCODE-24-JAN-11	http://www.modencode.org/White.shtml	2014-10-01	pd
FBgn0261434	FBgn0041171	hkb	ago	PDI: Transcription factor-Gene	0.1925	-	ago	hkb	21177974	http://www.ncbi.nlm.nih.gov/sites/entrez?cmd=retrieve&db=pubmed&list_uids=21177974&dopt=DocSum	http://www.modencode.org/White.shtml	21177974(MI:0225(ChIP-chip) and ChIP-seq)	null	modENCODE-24-JAN-11	http://www.modencode.org/White.shtml	2014-10-01	pd
FBgn0261434	FBgn0264493	hkb	rdx	PDI: Transcription factor-Gene	0.1856	-	rdx	hkb	21177974	http://www.ncbi.nlm.nih.gov/sites/entrez?cmd=retrieve&db=pubmed&list_uids=21177974&dopt=DocSum	http://www.modencode.org/White.shtml	21177974(MI:0225(ChIP-chip) and ChIP-seq)	null	modENCODE-24-JAN-11	http://www.modencode.org/White.shtml	2014-10-01	pd
FBgn0261434	FBgn0264495	hkb	gpp	PDI: Transcription factor-Gene	0.2344	-	gpp	hkb	21177974	http://www.ncbi.nlm.nih.gov/sites/entrez?cmd=retrieve&db=pubmed&list_uids=21177974&dopt=DocSum	http://www.modencode.org/White.shtml	21177974(MI:0225(ChIP-chip) and ChIP-seq)	null	modENCODE-24-JAN-11	http://www.modencode.org/White.shtml	2014-10-01	pd
FBgn0261434	FBgn0041174	hkb	Vhl	PDI: Transcription factor-Gene	0.3654	-	Vhl	hkb	21177974	http://www.ncbi.nlm.nih.gov/sites/entrez?cmd=retrieve&db=pubmed&list_uids=21177974&dopt=DocSum	http://www.modencode.org/White.shtml	21177974(MI:0225(ChIP-chip) and ChIP-seq)	null	modENCODE-24-JAN-11	http://www.modencode.org/White.shtml	2014-10-01	pd
FBgn0261434	FBgn0013983	hkb	imd	PDI: Transcription factor-Gene	-0.0955	-	imd	hkb	21177974	http://www.ncbi.nlm.nih.gov/sites/entrez?cmd=retrieve&db=pubmed&list_uids=21177974&dopt=DocSum	http://www.modencode.org/White.shtml	21177974(MI:0225(ChIP-chip) and ChIP-seq)	null	modENCODE-24-JAN-11	http://www.modencode.org/White.shtml	2014-10-01	pd
FBgn0261434	FBgn0013987	hkb	MAPk-Ak2	PDI: Transcription factor-Gene	0.1622	-	MAPk-Ak2	hkb	21177974	http://www.ncbi.nlm.nih.gov/sites/entrez?cmd=retrieve&db=pubmed&list_uids=21177974&dopt=DocSum	http://www.modencode.org/White.shtml	21177974(MI:0225(ChIP-chip) and ChIP-seq)	null	modENCODE-24-JAN-11	http://www.modencode.org/White.shtml	2014-10-01	pd
FBgn0261434	FBgn0037467	hkb	Ufl1	PDI: Transcription factor-Gene	0.0719	-	CG1104	hkb	21177974	http://www.ncbi.nlm.nih.gov/sites/entrez?cmd=retrieve&db=pubmed&list_uids=21177974&dopt=DocSum	http://www.modencode.org/White.shtml	21177974(MI:0225(ChIP-chip) and ChIP-seq)	null	modENCODE-24-JAN-11	http://www.modencode.org/White.shtml	2014-10-01	pd
FBgn0261434	FBgn0037468	hkb	CG1943	PDI: Transcription factor-Gene	0.4384	-	CG1943	hkb	21177974	http://www.ncbi.nlm.nih.gov/sites/entrez?cmd=retrieve&db=pubmed&list_uids=21177974&dopt=DocSum	http://www.modencode.org/White.shtml	21177974(MI:0225(ChIP-chip) and ChIP-seq)	null	modENCODE-24-JAN-11	http://www.modencode.org/White.shtml	2014-10-01	pd
FBgn0261434	FBgn0052406	hkb	PVRAP	PDI: Transcription factor-Gene	0.1918	-	PVRAP	hkb	21177974	http://www.ncbi.nlm.nih.gov/sites/entrez?cmd=retrieve&db=pubmed&list_uids=21177974&dopt=DocSum	http://www.modencode.org/White.shtml	21177974(MI:0225(ChIP-chip) and ChIP-seq)	null	modENCODE-24-JAN-11	http://www.modencode.org/White.shtml	2014-10-01	pd
FBgn0261434	FBgn0085408	hkb	Shroom	PDI: Transcription factor-Gene	-0.1326	-	Shroom	hkb	21177974	http://www.ncbi.nlm.nih.gov/sites/entrez?cmd=retrieve&db=pubmed&list_uids=21177974&dopt=DocSum	http://www.modencode.org/White.shtml	21177974(MI:0225(ChIP-chip) and ChIP-seq)	null	modENCODE-24-JAN-11	http://www.modencode.org/White.shtml	2014-10-01	pd
FBgn0261434	FBgn0264089	hkb	sli	PDI: Transcription factor-Gene	0.724	-	sli	hkb	21177974	http://www.ncbi.nlm.nih.gov/sites/entrez?cmd=retrieve&db=pubmed&list_uids=21177974&dopt=DocSum	http://www.modencode.org/White.shtml	21177974(MI:0225(ChIP-chip) and ChIP-seq)	null	modENCODE-24-JAN-11	http://www.modencode.org/White.shtml	2014-10-01	pd
FBgn0261434	FBgn0038304	hkb	CG12241	PDI: Transcription factor-Gene	0.0391	-	CG12241	hkb	21177974	http://www.ncbi.nlm.nih.gov/sites/entrez?cmd=retrieve&db=pubmed&list_uids=21177974&dopt=DocSum	http://www.modencode.org/White.shtml	21177974(MI:0225(ChIP-chip) and ChIP-seq)	null	modENCODE-24-JAN-11	http://www.modencode.org/White.shtml	2014-10-01	pd
FBgn0261434	FBgn0038303	hkb	SIDL	PDI: Transcription factor-Gene	0.462	-	SIDL	hkb	21177974	http://www.ncbi.nlm.nih.gov/sites/entrez?cmd=retrieve&db=pubmed&list_uids=21177974&dopt=DocSum	http://www.modencode.org/White.shtml	21177974(MI:0225(ChIP-chip) and ChIP-seq)	null	modENCODE-24-JAN-11	http://www.modencode.org/White.shtml	2014-10-01	pd
FBgn0261434	FBgn0019637	hkb	Atu	PDI: Transcription factor-Gene	0.7149	-	Atu	hkb	21177974	http://www.ncbi.nlm.nih.gov/sites/entrez?cmd=retrieve&db=pubmed&list_uids=21177974&dopt=DocSum	http://www.modencode.org/White.shtml	21177974(MI:0225(ChIP-chip) and ChIP-seq)	null	modENCODE-24-JAN-11	http://www.modencode.org/White.shtml	2014-10-01	pd
FBgn0261434	FBgn0001404	hkb	egh	PDI: Transcription factor-Gene	-0.0706	-	egh	hkb	21177974	http://www.ncbi.nlm.nih.gov/sites/entrez?cmd=retrieve&db=pubmed&list_uids=21177974&dopt=DocSum	http://www.modencode.org/White.shtml	21177974(MI:0225(ChIP-chip) and ChIP-seq)	null	modENCODE-24-JAN-11	http://www.modencode.org/White.shtml	2014-10-01	pd
FBgn0261434	FBgn0027932	hkb	Akap200	PDI: Transcription factor-Gene	0.3547	-	Akap200	hkb	21177974	http://www.ncbi.nlm.nih.gov/sites/entrez?cmd=retrieve&db=pubmed&list_uids=21177974&dopt=DocSum	http://www.modencode.org/White.shtml	21177974(MI:0225(ChIP-chip) and ChIP-seq)	null	modENCODE-24-JAN-11	http://www.modencode.org/White.shtml	2014-10-01	pd
FBgn0261434	FBgn0038834	hkb	RpS30	PDI: Transcription factor-Gene	-	-	RpS30	hkb	21177974	http://www.ncbi.nlm.nih.gov/sites/entrez?cmd=retrieve&db=pubmed&list_uids=21177974&dopt=DocSum	http://www.modencode.org/White.shtml	21177974(MI:0225(ChIP-chip) and ChIP-seq)	null	modENCODE-24-JAN-11	http://www.modencode.org/White.shtml	2014-10-01	pd
FBgn0261434	FBgn0041186	hkb	Slbp	PDI: Transcription factor-Gene	0.6277	-	Slbp	hkb	21177974	http://www.ncbi.nlm.nih.gov/sites/entrez?cmd=retrieve&db=pubmed&list_uids=21177974&dopt=DocSum	http://www.modencode.org/White.shtml	21177974(MI:0225(ChIP-chip) and ChIP-seq)	null	modENCODE-24-JAN-11	http://www.modencode.org/White.shtml	2014-10-01	pd
FBgn0261434	FBgn0035464	hkb	PIG-B	PDI: Transcription factor-Gene	0.7177	-	CG12006	hkb	21177974	http://www.ncbi.nlm.nih.gov/sites/entrez?cmd=retrieve&db=pubmed&list_uids=21177974&dopt=DocSum	http://www.modencode.org/White.shtml	21177974(MI:0225(ChIP-chip) and ChIP-seq)	null	modENCODE-24-JAN-11	http://www.modencode.org/White.shtml	2014-10-01	pd
FBgn0261434	FBgn0027535	hkb	botv	PDI: Transcription factor-Gene	0.5577	-	botv	hkb	21177974	http://www.ncbi.nlm.nih.gov/sites/entrez?cmd=retrieve&db=pubmed&list_uids=21177974&dopt=DocSum	http://www.modencode.org/White.shtml	21177974(MI:0225(ChIP-chip) and ChIP-seq)	null	modENCODE-24-JAN-11	http://www.modencode.org/White.shtml	2014-10-01	pd
FBgn0261434	FBgn0264489	hkb	CG43897	PDI: Transcription factor-Gene	-0.2966	-	CG43897	hkb	21177974	http://www.ncbi.nlm.nih.gov/sites/entrez?cmd=retrieve&db=pubmed&list_uids=21177974&dopt=DocSum	http://www.modencode.org/White.shtml	21177974(MI:0225(ChIP-chip) and ChIP-seq)	null	modENCODE-24-JAN-11	http://www.modencode.org/White.shtml	2014-10-01	pd
FBgn0261434	FBgn0038833	hkb	CG15696	PDI: Transcription factor-Gene	0.8834	-	CG15696	hkb	21177974	http://www.ncbi.nlm.nih.gov/sites/entrez?cmd=retrieve&db=pubmed&list_uids=21177974&dopt=DocSum	http://www.modencode.org/White.shtml	21177974(MI:0225(ChIP-chip) and ChIP-seq)	null	modENCODE-24-JAN-11	http://www.modencode.org/White.shtml	2014-10-01	pd
FBgn0261434	FBgn0085412	hkb	CG34383	PDI: Transcription factor-Gene	0.312	-	CG34383	hkb	21177974	http://www.ncbi.nlm.nih.gov/sites/entrez?cmd=retrieve&db=pubmed&list_uids=21177974&dopt=DocSum	http://www.modencode.org/White.shtml	21177974(MI:0225(ChIP-chip) and ChIP-seq)	null	modENCODE-24-JAN-11	http://www.modencode.org/White.shtml	2014-10-01	pd
FBgn0261434	FBgn0023095	hkb	caps	PDI: Transcription factor-Gene	-0.4602	-	caps	hkb	21177974	http://www.ncbi.nlm.nih.gov/sites/entrez?cmd=retrieve&db=pubmed&list_uids=21177974&dopt=DocSum	http://www.modencode.org/White.shtml	21177974(MI:0225(ChIP-chip) and ChIP-seq)	null	modENCODE-24-JAN-11	http://www.modencode.org/White.shtml	2014-10-01	pd
FBgn0261434	FBgn0023097	hkb	bon	PDI: Transcription factor-Gene	0.7961	-	bon	hkb	21177974	http://www.ncbi.nlm.nih.gov/sites/entrez?cmd=retrieve&db=pubmed&list_uids=21177974&dopt=DocSum	http://www.modencode.org/White.shtml	21177974(MI:0225(ChIP-chip) and ChIP-seq)	null	modENCODE-24-JAN-11	http://www.modencode.org/White.shtml	2014-10-01	pd
FBgn0261434	FBgn0010303	hkb	hep	PDI: Transcription factor-Gene	0.234	-	hep	hkb	21177974	http://www.ncbi.nlm.nih.gov/sites/entrez?cmd=retrieve&db=pubmed&list_uids=21177974&dopt=DocSum	http://www.modencode.org/White.shtml	21177974(MI:0225(ChIP-chip) and ChIP-seq)	null	modENCODE-24-JAN-11	http://www.modencode.org/White.shtml	2014-10-01	pd
FBgn0261434	FBgn0034986	hkb	mRpS17	PDI: Transcription factor-Gene	0.2808	-	mRpS17	hkb	21177974	http://www.ncbi.nlm.nih.gov/sites/entrez?cmd=retrieve&db=pubmed&list_uids=21177974&dopt=DocSum	http://www.modencode.org/White.shtml	21177974(MI:0225(ChIP-chip) and ChIP-seq)	null	modENCODE-24-JAN-11	http://www.modencode.org/White.shtml	2014-10-01	pd
FBgn0261434	FBgn0010300	hkb	brat	PDI: Transcription factor-Gene	0.4848	-	brat	hkb	21177974	http://www.ncbi.nlm.nih.gov/sites/entrez?cmd=retrieve&db=pubmed&list_uids=21177974&dopt=DocSum	http://www.modencode.org/White.shtml	21177974(MI:0225(ChIP-chip) and ChIP-seq)	null	modENCODE-24-JAN-11	http://www.modencode.org/White.shtml	2014-10-01	pd
FBgn0261434	FBgn0005671	hkb	Vha55	PDI: Transcription factor-Gene	-0.301	-	Vha55	hkb	21177974	http://www.ncbi.nlm.nih.gov/sites/entrez?cmd=retrieve&db=pubmed&list_uids=21177974&dopt=DocSum	http://www.modencode.org/White.shtml	21177974(MI:0225(ChIP-chip) and ChIP-seq)	null	modENCODE-24-JAN-11	http://www.modencode.org/White.shtml	2014-10-01	pd
FBgn0261434	FBgn0005672	hkb	spi	PDI: Transcription factor-Gene	0.7436	-	spi	hkb	21177974	http://www.ncbi.nlm.nih.gov/sites/entrez?cmd=retrieve&db=pubmed&list_uids=21177974&dopt=DocSum	http://www.modencode.org/White.shtml	21177974(MI:0225(ChIP-chip) and ChIP-seq)	null	modENCODE-24-JAN-11	http://www.modencode.org/White.shtml	2014-10-01	pd
FBgn0261434	FBgn0027948	hkb	msps	PDI: Transcription factor-Gene	0.4091	-	msps	hkb	21177974	http://www.ncbi.nlm.nih.gov/sites/entrez?cmd=retrieve&db=pubmed&list_uids=21177974&dopt=DocSum	http://www.modencode.org/White.shtml	21177974(MI:0225(ChIP-chip) and ChIP-seq)	null	modENCODE-24-JAN-11	http://www.modencode.org/White.shtml	2014-10-01	pd
FBgn0261434	FBgn0032153	hkb	CG4537	PDI: Transcription factor-Gene	0.5457	-	CG4537	hkb	21177974	http://www.ncbi.nlm.nih.gov/sites/entrez?cmd=retrieve&db=pubmed&list_uids=21177974&dopt=DocSum	http://www.modencode.org/White.shtml	21177974(MI:0225(ChIP-chip) and ChIP-seq)	null	modENCODE-24-JAN-11	http://www.modencode.org/White.shtml	2014-10-01	pd
FBgn0261434	FBgn0043903	hkb	dome	PDI: Transcription factor-Gene	0.54	-	dome	hkb	21177974	http://www.ncbi.nlm.nih.gov/sites/entrez?cmd=retrieve&db=pubmed&list_uids=21177974&dopt=DocSum	http://www.modencode.org/White.shtml	21177974(MI:0225(ChIP-chip) and ChIP-seq)	null	modENCODE-24-JAN-11	http://www.modencode.org/White.shtml	2014-10-01	pd
FBgn0261434	FBgn0035240	hkb	CG33791	PDI: Transcription factor-Gene	-0.228	-	CG33791	hkb	21177974	http://www.ncbi.nlm.nih.gov/sites/entrez?cmd=retrieve&db=pubmed&list_uids=21177974&dopt=DocSum	http://www.modencode.org/White.shtml	21177974(MI:0225(ChIP-chip) and ChIP-seq)	null	modENCODE-24-JAN-11	http://www.modencode.org/White.shtml	2014-10-01	pd
FBgn0261434	FBgn0041156	hkb	exex	PDI: Transcription factor-Gene	0.0001	-	exex	hkb	21177974	http://www.ncbi.nlm.nih.gov/sites/entrez?cmd=retrieve&db=pubmed&list_uids=21177974&dopt=DocSum	http://www.modencode.org/White.shtml	21177974(MI:0225(ChIP-chip) and ChIP-seq)	null	modENCODE-24-JAN-11	http://www.modencode.org/White.shtml	2014-10-01	pd
FBgn0261434	FBgn0027569	hkb	cert	PDI: Transcription factor-Gene	-0.1225	-	cert	hkb	21177974	http://www.ncbi.nlm.nih.gov/sites/entrez?cmd=retrieve&db=pubmed&list_uids=21177974&dopt=DocSum	http://www.modencode.org/White.shtml	21177974(MI:0225(ChIP-chip) and ChIP-seq)	null	modENCODE-24-JAN-11	http://www.modencode.org/White.shtml	2014-10-01	pd
FBgn0261434	FBgn0263355	hkb	CG31688	PDI: Transcription factor-Gene	-0.4002	-	CG31688	hkb	21177974	http://www.ncbi.nlm.nih.gov/sites/entrez?cmd=retrieve&db=pubmed&list_uids=21177974&dopt=DocSum	http://www.modencode.org/White.shtml	21177974(MI:0225(ChIP-chip) and ChIP-seq)	null	modENCODE-24-JAN-11	http://www.modencode.org/White.shtml	2014-10-01	pd
FBgn0261434	FBgn0000412	hkb	D1	PDI: Transcription factor-Gene	0.6727	-	D1	hkb	21177974	http://www.ncbi.nlm.nih.gov/sites/entrez?cmd=retrieve&db=pubmed&list_uids=21177974&dopt=DocSum	http://www.modencode.org/White.shtml	21177974(MI:0225(ChIP-chip) and ChIP-seq)	null	modENCODE-24-JAN-11	http://www.modencode.org/White.shtml	2014-10-01	pd
FBgn0261434	FBgn0000414	hkb	Dab	PDI: Transcription factor-Gene	0.5069	-	Dab	hkb	21177974	http://www.ncbi.nlm.nih.gov/sites/entrez?cmd=retrieve&db=pubmed&list_uids=21177974&dopt=DocSum	http://www.modencode.org/White.shtml	21177974(MI:0225(ChIP-chip) and ChIP-seq)	null	modENCODE-24-JAN-11	http://www.modencode.org/White.shtml	2014-10-01	pd
FBgn0261434	FBgn0000404	hkb	CycA	PDI: Transcription factor-Gene	0.5018	-	CycA	hkb	21177974	http://www.ncbi.nlm.nih.gov/sites/entrez?cmd=retrieve&db=pubmed&list_uids=21177974&dopt=DocSum	http://www.modencode.org/White.shtml	21177974(MI:0225(ChIP-chip) and ChIP-seq)	null	modENCODE-24-JAN-11	http://www.modencode.org/White.shtml	2014-10-01	pd
FBgn0261434	FBgn0010333	hkb	Rac1	PDI: Transcription factor-Gene	0.4679	-	Rac1	hkb	21177974	http://www.ncbi.nlm.nih.gov/sites/entrez?cmd=retrieve&db=pubmed&list_uids=21177974&dopt=DocSum	http://www.modencode.org/White.shtml	21177974(MI:0225(ChIP-chip) and ChIP-seq)	null	modENCODE-24-JAN-11	http://www.modencode.org/White.shtml	2014-10-01	pd
FBgn0261434	FBgn0033987	hkb	ckn	PDI: Transcription factor-Gene	0.5167	-	ckn	hkb	21177974	http://www.ncbi.nlm.nih.gov/sites/entrez?cmd=retrieve&db=pubmed&list_uids=21177974&dopt=DocSum	http://www.modencode.org/White.shtml	21177974(MI:0225(ChIP-chip) and ChIP-seq)	null	modENCODE-24-JAN-11	http://www.modencode.org/White.shtml	2014-10-01	pd
FBgn0261434	FBgn0037489	hkb	CG1234	PDI: Transcription factor-Gene	0.5319	-	CG1234	hkb	21177974	http://www.ncbi.nlm.nih.gov/sites/entrez?cmd=retrieve&db=pubmed&list_uids=21177974&dopt=DocSum	http://www.modencode.org/White.shtml	21177974(MI:0225(ChIP-chip) and ChIP-seq)	null	modENCODE-24-JAN-11	http://www.modencode.org/White.shtml	2014-10-01	pd
FBgn0261434	FBgn0001218	hkb	Hsc70-3	PDI: Transcription factor-Gene	-0.2411	-	Hsc70-3	hkb	21177974	http://www.ncbi.nlm.nih.gov/sites/entrez?cmd=retrieve&db=pubmed&list_uids=21177974&dopt=DocSum	http://www.modencode.org/White.shtml	21177974(MI:0225(ChIP-chip) and ChIP-seq)	null	modENCODE-24-JAN-11	http://www.modencode.org/White.shtml	2014-10-01	pd
FBgn0261434	FBgn0016983	hkb	smid	PDI: Transcription factor-Gene	0.723	-	smid	hkb	21177974	http://www.ncbi.nlm.nih.gov/sites/entrez?cmd=retrieve&db=pubmed&list_uids=21177974&dopt=DocSum	http://www.modencode.org/White.shtml	21177974(MI:0225(ChIP-chip) and ChIP-seq)	null	modENCODE-24-JAN-11	http://www.modencode.org/White.shtml	2014-10-01	pd
FBgn0261434	FBgn0037481	hkb	MAGE	PDI: Transcription factor-Gene	0.5837	-	MAGE	hkb	21177974	http://www.ncbi.nlm.nih.gov/sites/entrez?cmd=retrieve&db=pubmed&list_uids=21177974&dopt=DocSum	http://www.modencode.org/White.shtml	21177974(MI:0225(ChIP-chip) and ChIP-seq)	null	modENCODE-24-JAN-11	http://www.modencode.org/White.shtml	2014-10-01	pd
FBgn0261434	FBgn0034180	hkb	Ehbp1	PDI: Transcription factor-Gene	0.2795	-	Ehbp1	hkb	21177974	http://www.ncbi.nlm.nih.gov/sites/entrez?cmd=retrieve&db=pubmed&list_uids=21177974&dopt=DocSum	http://www.modencode.org/White.shtml	21177974(MI:0225(ChIP-chip) and ChIP-seq)	null	modENCODE-24-JAN-11	http://www.modencode.org/White.shtml	2014-10-01	pd
FBgn0261434	FBgn0035239	hkb	CG18170	PDI: Transcription factor-Gene	-0.1764	-	CG18170	hkb	21177974	http://www.ncbi.nlm.nih.gov/sites/entrez?cmd=retrieve&db=pubmed&list_uids=21177974&dopt=DocSum	http://www.modencode.org/White.shtml	21177974(MI:0225(ChIP-chip) and ChIP-seq)	null	modENCODE-24-JAN-11	http://www.modencode.org/White.shtml	2014-10-01	pd
FBgn0261434	FBgn0035238	hkb	CG12104	PDI: Transcription factor-Gene	0.2342	-	CG12104	hkb	21177974	http://www.ncbi.nlm.nih.gov/sites/entrez?cmd=retrieve&db=pubmed&list_uids=21177974&dopt=DocSum	http://www.modencode.org/White.shtml	21177974(MI:0225(ChIP-chip) and ChIP-seq)	null	modENCODE-24-JAN-11	http://www.modencode.org/White.shtml	2014-10-01	pd
FBgn0261434	FBgn0041160	hkb	comm2	PDI: Transcription factor-Gene	0.3862	-	comm2	hkb	21177974	http://www.ncbi.nlm.nih.gov/sites/entrez?cmd=retrieve&db=pubmed&list_uids=21177974&dopt=DocSum	http://www.modencode.org/White.shtml	21177974(MI:0225(ChIP-chip) and ChIP-seq)	null	modENCODE-24-JAN-11	http://www.modencode.org/White.shtml	2014-10-01	pd
FBgn0261434	FBgn0035236	hkb	CG12004	PDI: Transcription factor-Gene	-0.1333	-	CG12004	hkb	21177974	http://www.ncbi.nlm.nih.gov/sites/entrez?cmd=retrieve&db=pubmed&list_uids=21177974&dopt=DocSum	http://www.modencode.org/White.shtml	21177974(MI:0225(ChIP-chip) and ChIP-seq)	null	modENCODE-24-JAN-11	http://www.modencode.org/White.shtml	2014-10-01	pd
FBgn0261434	FBgn0035235	hkb	CG7879	PDI: Transcription factor-Gene	0.823	-	CG7879	hkb	21177974	http://www.ncbi.nlm.nih.gov/sites/entrez?cmd=retrieve&db=pubmed&list_uids=21177974&dopt=DocSum	http://www.modencode.org/White.shtml	21177974(MI:0225(ChIP-chip) and ChIP-seq)	null	modENCODE-24-JAN-11	http://www.modencode.org/White.shtml	2014-10-01	pd
FBgn0261434	FBgn0039335	hkb	Vps33B	PDI: Transcription factor-Gene	0.0386	-	Vps33B	hkb	21177974	http://www.ncbi.nlm.nih.gov/sites/entrez?cmd=retrieve&db=pubmed&list_uids=21177974&dopt=DocSum	http://www.modencode.org/White.shtml	21177974(MI:0225(ChIP-chip) and ChIP-seq)	null	modENCODE-24-JAN-11	http://www.modencode.org/White.shtml	2014-10-01	pd
FBgn0261434	FBgn0020910	hkb	RpL3	PDI: Transcription factor-Gene	0.4066	-	RpL3	hkb	21177974	http://www.ncbi.nlm.nih.gov/sites/entrez?cmd=retrieve&db=pubmed&list_uids=21177974&dopt=DocSum	http://www.modencode.org/White.shtml	21177974(MI:0225(ChIP-chip) and ChIP-seq)	null	modENCODE-24-JAN-11	http://www.modencode.org/White.shtml	2014-10-01	pd
FBgn0261434	FBgn0024889	hkb	Kap-alpha1	PDI: Transcription factor-Gene	0.0173	-	Kap-Œ±1	hkb	21177974	http://www.ncbi.nlm.nih.gov/sites/entrez?cmd=retrieve&db=pubmed&list_uids=21177974&dopt=DocSum	http://www.modencode.org/White.shtml	21177974(MI:0225(ChIP-chip) and ChIP-seq)	null	modENCODE-24-JAN-11	http://www.modencode.org/White.shtml	2014-10-01	pd
FBgn0261434	FBgn0001215	hkb	Hrb98DE	PDI: Transcription factor-Gene	0.9335	-	Hrb98DE	hkb	21177974	http://www.ncbi.nlm.nih.gov/sites/entrez?cmd=retrieve&db=pubmed&list_uids=21177974&dopt=DocSum	http://www.modencode.org/White.shtml	21177974(MI:0225(ChIP-chip) and ChIP-seq)	null	modENCODE-24-JAN-11	http://www.modencode.org/White.shtml	2014-10-01	pd
FBgn0261434	FBgn0038853	hkb	RhoGAP93B	PDI: Transcription factor-Gene	0.6562	-	RhoGAP93B	hkb	21177974	http://www.ncbi.nlm.nih.gov/sites/entrez?cmd=retrieve&db=pubmed&list_uids=21177974&dopt=DocSum	http://www.modencode.org/White.shtml	21177974(MI:0225(ChIP-chip) and ChIP-seq)	null	modENCODE-24-JAN-11	http://www.modencode.org/White.shtml	2014-10-01	pd
FBgn0261434	FBgn0013997	hkb	Nrx-IV	PDI: Transcription factor-Gene	0.2995	-	Nrx-IV	hkb	21177974	http://www.ncbi.nlm.nih.gov/sites/entrez?cmd=retrieve&db=pubmed&list_uids=21177974&dopt=DocSum	http://www.modencode.org/White.shtml	21177974(MI:0225(ChIP-chip) and ChIP-seq)	null	modENCODE-24-JAN-11	http://www.modencode.org/White.shtml	2014-10-01	pd
FBgn0261434	FBgn0035639	hkb	kri	PDI: Transcription factor-Gene	0.2901	-	CG5537	hkb	21177974	http://www.ncbi.nlm.nih.gov/sites/entrez?cmd=retrieve&db=pubmed&list_uids=21177974&dopt=DocSum	http://www.modencode.org/White.shtml	21177974(MI:0225(ChIP-chip) and ChIP-seq)	null	modENCODE-24-JAN-11	http://www.modencode.org/White.shtml	2014-10-01	pd
FBgn0261434	FBgn0032149	hkb	CG4036	PDI: Transcription factor-Gene	0.3785	-	CG4036	hkb	21177974	http://www.ncbi.nlm.nih.gov/sites/entrez?cmd=retrieve&db=pubmed&list_uids=21177974&dopt=DocSum	http://www.modencode.org/White.shtml	21177974(MI:0225(ChIP-chip) and ChIP-seq)	null	modENCODE-24-JAN-11	http://www.modencode.org/White.shtml	2014-10-01	pd
FBgn0261434	FBgn0010315	hkb	CycD	PDI: Transcription factor-Gene	0.3516	-	CycD	hkb	21177974	http://www.ncbi.nlm.nih.gov/sites/entrez?cmd=retrieve&db=pubmed&list_uids=21177974&dopt=DocSum	http://www.modencode.org/White.shtml	21177974(MI:0225(ChIP-chip) and ChIP-seq)	null	modENCODE-24-JAN-11	http://www.modencode.org/White.shtml	2014-10-01	pd
FBgn0261434	FBgn0035033	hkb	CG3548	PDI: Transcription factor-Gene	0.2121	-	CG3548	hkb	21177974	http://www.ncbi.nlm.nih.gov/sites/entrez?cmd=retrieve&db=pubmed&list_uids=21177974&dopt=DocSum	http://www.modencode.org/White.shtml	21177974(MI:0225(ChIP-chip) and ChIP-seq)	null	modENCODE-24-JAN-11	http://www.modencode.org/White.shtml	2014-10-01	pd
FBgn0261434	FBgn0035032	hkb	ATPsynF	PDI: Transcription factor-Gene	-0.3296	-	ATPsynF	hkb	21177974	http://www.ncbi.nlm.nih.gov/sites/entrez?cmd=retrieve&db=pubmed&list_uids=21177974&dopt=DocSum	http://www.modencode.org/White.shtml	21177974(MI:0225(ChIP-chip) and ChIP-seq)	null	modENCODE-24-JAN-11	http://www.modencode.org/White.shtml	2014-10-01	pd
FBgn0261434	FBgn0025549	hkb	unc-119	PDI: Transcription factor-Gene	0.645	-	unc-119	hkb	21177974	http://www.ncbi.nlm.nih.gov/sites/entrez?cmd=retrieve&db=pubmed&list_uids=21177974&dopt=DocSum	http://www.modencode.org/White.shtml	21177974(MI:0225(ChIP-chip) and ChIP-seq)	null	modENCODE-24-JAN-11	http://www.modencode.org/White.shtml	2014-10-01	pd
FBgn0261434	FBgn0035643	hkb	CG13287	PDI: Transcription factor-Gene	0.4773	-	CG13287	hkb	21177974	http://www.ncbi.nlm.nih.gov/sites/entrez?cmd=retrieve&db=pubmed&list_uids=21177974&dopt=DocSum	http://www.modencode.org/White.shtml	21177974(MI:0225(ChIP-chip) and ChIP-seq)	null	modENCODE-24-JAN-11	http://www.modencode.org/White.shtml	2014-10-01	pd
FBgn0261434	FBgn0025186	hkb	ari-2	PDI: Transcription factor-Gene	0.4684	-	ari-2	hkb	21177974	http://www.ncbi.nlm.nih.gov/sites/entrez?cmd=retrieve&db=pubmed&list_uids=21177974&dopt=DocSum	http://www.modencode.org/White.shtml	21177974(MI:0225(ChIP-chip) and ChIP-seq)	null	modENCODE-24-JAN-11	http://www.modencode.org/White.shtml	2014-10-01	pd
FBgn0261434	FBgn0001941	hkb	ifc	PDI: Transcription factor-Gene	0.2185	-	ifc	hkb	21177974	http://www.ncbi.nlm.nih.gov/sites/entrez?cmd=retrieve&db=pubmed&list_uids=21177974&dopt=DocSum	http://www.modencode.org/White.shtml	21177974(MI:0225(ChIP-chip) and ChIP-seq)	null	modENCODE-24-JAN-11	http://www.modencode.org/White.shtml	2014-10-01	pd
FBgn0261434	FBgn0000810	hkb	fs(1)K10	PDI: Transcription factor-Gene	0.5886	-	fs(1)K10	hkb	21177974	http://www.ncbi.nlm.nih.gov/sites/entrez?cmd=retrieve&db=pubmed&list_uids=21177974&dopt=DocSum	http://www.modencode.org/White.shtml	21177974(MI:0225(ChIP-chip) and ChIP-seq)	null	modENCODE-24-JAN-11	http://www.modencode.org/White.shtml	2014-10-01	pd
FBgn0261434	FBgn0010583	hkb	dock	PDI: Transcription factor-Gene	0.7812	-	dock	hkb	21177974	http://www.ncbi.nlm.nih.gov/sites/entrez?cmd=retrieve&db=pubmed&list_uids=21177974&dopt=DocSum	http://www.modencode.org/White.shtml	21177974(MI:0225(ChIP-chip) and ChIP-seq)	null	modENCODE-24-JAN-11	http://www.modencode.org/White.shtml	2014-10-01	pd
FBgn0261434	FBgn0037470	hkb	Tailor	PDI: Transcription factor-Gene	0.1906	-	Tailor	hkb	21177974	http://www.ncbi.nlm.nih.gov/sites/entrez?cmd=retrieve&db=pubmed&list_uids=21177974&dopt=DocSum	http://www.modencode.org/White.shtml	21177974(MI:0225(ChIP-chip) and ChIP-seq)	null	modENCODE-24-JAN-11	http://www.modencode.org/White.shtml	2014-10-01	pd
FBgn0261434	FBgn0001942	hkb	eIF4A	PDI: Transcription factor-Gene	0.2562	-	eIF-4a	hkb	21177974	http://www.ncbi.nlm.nih.gov/sites/entrez?cmd=retrieve&db=pubmed&list_uids=21177974&dopt=DocSum	http://www.modencode.org/White.shtml	21177974(MI:0225(ChIP-chip) and ChIP-seq)	null	modENCODE-24-JAN-11	http://www.modencode.org/White.shtml	2014-10-01	pd
FBgn0261434	FBgn0013726	hkb	pnut	PDI: Transcription factor-Gene	0.7023	-	pnut	hkb	21177974	http://www.ncbi.nlm.nih.gov/sites/entrez?cmd=retrieve&db=pubmed&list_uids=21177974&dopt=DocSum	http://www.modencode.org/White.shtml	21177974(MI:0225(ChIP-chip) and ChIP-seq)	null	modENCODE-24-JAN-11	http://www.modencode.org/White.shtml	2014-10-01	pd
FBgn0261434	FBgn0014037	hkb	Su(Tpl)	PDI: Transcription factor-Gene	0.3032	-	Su(Tpl)	hkb	21177974	http://www.ncbi.nlm.nih.gov/sites/entrez?cmd=retrieve&db=pubmed&list_uids=21177974&dopt=DocSum	http://www.modencode.org/White.shtml	21177974(MI:0225(ChIP-chip) and ChIP-seq)	null	modENCODE-24-JAN-11	http://www.modencode.org/White.shtml	2014-10-01	pd
FBgn0261434	FBgn0013725	hkb	phyl	PDI: Transcription factor-Gene	0.9172	-	phyl	hkb	21177974	http://www.ncbi.nlm.nih.gov/sites/entrez?cmd=retrieve&db=pubmed&list_uids=21177974&dopt=DocSum	http://www.modencode.org/White.shtml	21177974(MI:0225(ChIP-chip) and ChIP-seq)	null	modENCODE-24-JAN-11	http://www.modencode.org/White.shtml	2014-10-01	pd
FBgn0261434	FBgn0262081	hkb	Csk	PDI: Transcription factor-Gene	-0.0628	-	Csk	hkb	21177974	http://www.ncbi.nlm.nih.gov/sites/entrez?cmd=retrieve&db=pubmed&list_uids=21177974&dopt=DocSum	http://www.modencode.org/White.shtml	21177974(MI:0225(ChIP-chip) and ChIP-seq)	null	modENCODE-24-JAN-11	http://www.modencode.org/White.shtml	2014-10-01	pd
FBgn0261434	FBgn0032688	hkb	CG15160	PDI: Transcription factor-Gene	0.8502	-	CG15160	hkb	21177974	http://www.ncbi.nlm.nih.gov/sites/entrez?cmd=retrieve&db=pubmed&list_uids=21177974&dopt=DocSum	http://www.modencode.org/White.shtml	21177974(MI:0225(ChIP-chip) and ChIP-seq)	null	modENCODE-24-JAN-11	http://www.modencode.org/White.shtml	2014-10-01	pd
FBgn0261434	FBgn0265784	hkb	CrebB	PDI: Transcription factor-Gene	0.0907	-	CrebB	hkb	21177974	http://www.ncbi.nlm.nih.gov/sites/entrez?cmd=retrieve&db=pubmed&list_uids=21177974&dopt=DocSum	http://www.modencode.org/White.shtml	21177974(MI:0225(ChIP-chip) and ChIP-seq)	null	modENCODE-24-JAN-11	http://www.modencode.org/White.shtml	2014-10-01	pd
FBgn0261434	FBgn0027085	hkb	LeuRS-m	PDI: Transcription factor-Gene	0.2453	-	Aats-leu	hkb	21177974	http://www.ncbi.nlm.nih.gov/sites/entrez?cmd=retrieve&db=pubmed&list_uids=21177974&dopt=DocSum	http://www.modencode.org/White.shtml	21177974(MI:0225(ChIP-chip) and ChIP-seq)	null	modENCODE-24-JAN-11	http://www.modencode.org/White.shtml	2014-10-01	pd
FBgn0261434	FBgn0020312	hkb	Tmtc3	PDI: Transcription factor-Gene	0.7306	-	CG4050	hkb	21177974	http://www.ncbi.nlm.nih.gov/sites/entrez?cmd=retrieve&db=pubmed&list_uids=21177974&dopt=DocSum	http://www.modencode.org/White.shtml	21177974(MI:0225(ChIP-chip) and ChIP-seq)	null	modENCODE-24-JAN-11	http://www.modencode.org/White.shtml	2014-10-01	pd
FBgn0261434	FBgn0027086	hkb	IleRS	PDI: Transcription factor-Gene	0.2686	-	Aats-ile	hkb	21177974	http://www.ncbi.nlm.nih.gov/sites/entrez?cmd=retrieve&db=pubmed&list_uids=21177974&dopt=DocSum	http://www.modencode.org/White.shtml	21177974(MI:0225(ChIP-chip) and ChIP-seq)	null	modENCODE-24-JAN-11	http://www.modencode.org/White.shtml	2014-10-01	pd
FBgn0261434	FBgn0042173	hkb	CG18853	PDI: Transcription factor-Gene	-0.2712	-	CG18853	hkb	21177974	http://www.ncbi.nlm.nih.gov/sites/entrez?cmd=retrieve&db=pubmed&list_uids=21177974&dopt=DocSum	http://www.modencode.org/White.shtml	21177974(MI:0225(ChIP-chip) and ChIP-seq)	null	modENCODE-24-JAN-11	http://www.modencode.org/White.shtml	2014-10-01	pd
FBgn0261434	FBgn0040087	hkb	p115	PDI: Transcription factor-Gene	0.42	-	p115	hkb	21177974	http://www.ncbi.nlm.nih.gov/sites/entrez?cmd=retrieve&db=pubmed&list_uids=21177974&dopt=DocSum	http://www.modencode.org/White.shtml	21177974(MI:0225(ChIP-chip) and ChIP-seq)	null	modENCODE-24-JAN-11	http://www.modencode.org/White.shtml	2014-10-01	pd
FBgn0261434	FBgn0027082	hkb	ProRS-m	PDI: Transcription factor-Gene	0.3748	-	Aats-pro	hkb	21177974	http://www.ncbi.nlm.nih.gov/sites/entrez?cmd=retrieve&db=pubmed&list_uids=21177974&dopt=DocSum	http://www.modencode.org/White.shtml	21177974(MI:0225(ChIP-chip) and ChIP-seq)	null	modENCODE-24-JAN-11	http://www.modencode.org/White.shtml	2014-10-01	pd
FBgn0261434	FBgn0035498	hkb	Fit1	PDI: Transcription factor-Gene	-0.1169	-	Fit1	hkb	21177974	http://www.ncbi.nlm.nih.gov/sites/entrez?cmd=retrieve&db=pubmed&list_uids=21177974&dopt=DocSum	http://www.modencode.org/White.shtml	21177974(MI:0225(ChIP-chip) and ChIP-seq)	null	modENCODE-24-JAN-11	http://www.modencode.org/White.shtml	2014-10-01	pd
FBgn0261434	FBgn0027080	hkb	TyrRS	PDI: Transcription factor-Gene	0.3053	-	Aats-tyr	hkb	21177974	http://www.ncbi.nlm.nih.gov/sites/entrez?cmd=retrieve&db=pubmed&list_uids=21177974&dopt=DocSum	http://www.modencode.org/White.shtml	21177974(MI:0225(ChIP-chip) and ChIP-seq)	null	modENCODE-24-JAN-11	http://www.modencode.org/White.shtml	2014-10-01	pd
FBgn0261434	FBgn0020307	hkb	dve	PDI: Transcription factor-Gene	0.0577	-	dve	hkb	21177974	http://www.ncbi.nlm.nih.gov/sites/entrez?cmd=retrieve&db=pubmed&list_uids=21177974&dopt=DocSum	http://www.modencode.org/White.shtml	21177974(MI:0225(ChIP-chip) and ChIP-seq)	null	modENCODE-24-JAN-11	http://www.modencode.org/White.shtml	2014-10-01	pd
FBgn0261434	FBgn0020309	hkb	crol	PDI: Transcription factor-Gene	0.3584	-	crol	hkb	21177974	http://www.ncbi.nlm.nih.gov/sites/entrez?cmd=retrieve&db=pubmed&list_uids=21177974&dopt=DocSum	http://www.modencode.org/White.shtml	21177974(MI:0225(ChIP-chip) and ChIP-seq)	null	modENCODE-24-JAN-11	http://www.modencode.org/White.shtml	2014-10-01	pd
FBgn0261434	FBgn0016917	hkb	Stat92E	PDI: Transcription factor-Gene	0.1765	-	Stat92E	hkb	21177974	http://www.ncbi.nlm.nih.gov/sites/entrez?cmd=retrieve&db=pubmed&list_uids=21177974&dopt=DocSum	http://www.modencode.org/White.shtml	21177974(MI:0225(ChIP-chip) and ChIP-seq)	null	modENCODE-24-JAN-11	http://www.modencode.org/White.shtml	2014-10-01	pd
FBgn0261434	FBgn0015803	hkb	RtGEF	PDI: Transcription factor-Gene	0.427	-	RtGEF	hkb	21177974	http://www.ncbi.nlm.nih.gov/sites/entrez?cmd=retrieve&db=pubmed&list_uids=21177974&dopt=DocSum	http://www.modencode.org/White.shtml	21177974(MI:0225(ChIP-chip) and ChIP-seq)	null	modENCODE-24-JAN-11	http://www.modencode.org/White.shtml	2014-10-01	pd
FBgn0261434	FBgn0003274	hkb	RpLP2	PDI: Transcription factor-Gene	-0.3373	-	RpLP2	hkb	21177974	http://www.ncbi.nlm.nih.gov/sites/entrez?cmd=retrieve&db=pubmed&list_uids=21177974&dopt=DocSum	http://www.modencode.org/White.shtml	21177974(MI:0225(ChIP-chip) and ChIP-seq)	null	modENCODE-24-JAN-11	http://www.modencode.org/White.shtml	2014-10-01	pd
FBgn0261434	FBgn0040705	hkb	ND-B8	PDI: Transcription factor-Gene	-0.1649	-	ND-B8	hkb	21177974	http://www.ncbi.nlm.nih.gov/sites/entrez?cmd=retrieve&db=pubmed&list_uids=21177974&dopt=DocSum	http://www.modencode.org/White.shtml	21177974(MI:0225(ChIP-chip) and ChIP-seq)	null	modENCODE-24-JAN-11	http://www.modencode.org/White.shtml	2014-10-01	pd
FBgn0261434	FBgn0034737	hkb	CG11362	PDI: Transcription factor-Gene	-0.1993	-	CG11362	hkb	21177974	http://www.ncbi.nlm.nih.gov/sites/entrez?cmd=retrieve&db=pubmed&list_uids=21177974&dopt=DocSum	http://www.modencode.org/White.shtml	21177974(MI:0225(ChIP-chip) and ChIP-seq)	null	modENCODE-24-JAN-11	http://www.modencode.org/White.shtml	2014-10-01	pd
FBgn0261434	FBgn0001247	hkb	Ide	PDI: Transcription factor-Gene	-0.2343	-	Ide	hkb	21177974	http://www.ncbi.nlm.nih.gov/sites/entrez?cmd=retrieve&db=pubmed&list_uids=21177974&dopt=DocSum	http://www.modencode.org/White.shtml	21177974(MI:0225(ChIP-chip) and ChIP-seq)	null	modENCODE-24-JAN-11	http://www.modencode.org/White.shtml	2014-10-01	pd
FBgn0261434	FBgn0028336	hkb	l(1)G0255	PDI: Transcription factor-Gene	-0.3749	-	l(1)G0255	hkb	21177974	http://www.ncbi.nlm.nih.gov/sites/entrez?cmd=retrieve&db=pubmed&list_uids=21177974&dopt=DocSum	http://www.modencode.org/White.shtml	21177974(MI:0225(ChIP-chip) and ChIP-seq)	null	modENCODE-24-JAN-11	http://www.modencode.org/White.shtml	2014-10-01	pd
FBgn0261434	FBgn0003270	hkb	amos	PDI: Transcription factor-Gene	0.6273	-	amos	hkb	21177974	http://www.ncbi.nlm.nih.gov/sites/entrez?cmd=retrieve&db=pubmed&list_uids=21177974&dopt=DocSum	http://www.modencode.org/White.shtml	21177974(MI:0225(ChIP-chip) and ChIP-seq)	null	modENCODE-24-JAN-11	http://www.modencode.org/White.shtml	2014-10-01	pd
FBgn0261434	FBgn0013733	hkb	shot	PDI: Transcription factor-Gene	-0.2009	-	shot	hkb	21177974	http://www.ncbi.nlm.nih.gov/sites/entrez?cmd=retrieve&db=pubmed&list_uids=21177974&dopt=DocSum	http://www.modencode.org/White.shtml	21177974(MI:0225(ChIP-chip) and ChIP-seq)	null	modENCODE-24-JAN-11	http://www.modencode.org/White.shtml	2014-10-01	pd
FBgn0261434	FBgn0002775	hkb	msl-3	PDI: Transcription factor-Gene	0.8563	-	msl-3	hkb	21177974	http://www.ncbi.nlm.nih.gov/sites/entrez?cmd=retrieve&db=pubmed&list_uids=21177974&dopt=DocSum	http://www.modencode.org/White.shtml	21177974(MI:0225(ChIP-chip) and ChIP-seq)	null	modENCODE-24-JAN-11	http://www.modencode.org/White.shtml	2014-10-01	pd
FBgn0261434	FBgn0000629	hkb	E(z)	PDI: Transcription factor-Gene	0.5945	-	E(z)	hkb	21177974	http://www.ncbi.nlm.nih.gov/sites/entrez?cmd=retrieve&db=pubmed&list_uids=21177974&dopt=DocSum	http://www.modencode.org/White.shtml	21177974(MI:0225(ChIP-chip) and ChIP-seq)	null	modENCODE-24-JAN-11	http://www.modencode.org/White.shtml	2014-10-01	pd
FBgn0261434	FBgn0033491	hkb	CG18011	PDI: Transcription factor-Gene	0.5566	-	CG18011	hkb	21177974	http://www.ncbi.nlm.nih.gov/sites/entrez?cmd=retrieve&db=pubmed&list_uids=21177974&dopt=DocSum	http://www.modencode.org/White.shtml	21177974(MI:0225(ChIP-chip) and ChIP-seq)	null	modENCODE-24-JAN-11	http://www.modencode.org/White.shtml	2014-10-01	pd
FBgn0261434	FBgn0260986	hkb	mei-38	PDI: Transcription factor-Gene	0.5973	-	mei-38	hkb	21177974	http://www.ncbi.nlm.nih.gov/sites/entrez?cmd=retrieve&db=pubmed&list_uids=21177974&dopt=DocSum	http://www.modencode.org/White.shtml	21177974(MI:0225(ChIP-chip) and ChIP-seq)	null	modENCODE-24-JAN-11	http://www.modencode.org/White.shtml	2014-10-01	pd
FBgn0261434	FBgn0014020	hkb	Rho1	PDI: Transcription factor-Gene	-	-	Rho1	hkb	21177974	http://www.ncbi.nlm.nih.gov/sites/entrez?cmd=retrieve&db=pubmed&list_uids=21177974&dopt=DocSum	http://www.modencode.org/White.shtml	21177974(MI:0225(ChIP-chip) and ChIP-seq)	null	modENCODE-24-JAN-11	http://www.modencode.org/White.shtml	2014-10-01	pd
FBgn0261434	FBgn0261822	hkb	Bsg	PDI: Transcription factor-Gene	-0.1753	-	Bsg	hkb	21177974	http://www.ncbi.nlm.nih.gov/sites/entrez?cmd=retrieve&db=pubmed&list_uids=21177974&dopt=DocSum	http://www.modencode.org/White.shtml	21177974(MI:0225(ChIP-chip) and ChIP-seq)	null	modENCODE-24-JAN-11	http://www.modencode.org/White.shtml	2014-10-01	pd
FBgn0261434	FBgn0037490	hkb	CG10053	PDI: Transcription factor-Gene	0.2599	-	CG10053	hkb	21177974	http://www.ncbi.nlm.nih.gov/sites/entrez?cmd=retrieve&db=pubmed&list_uids=21177974&dopt=DocSum	http://www.modencode.org/White.shtml	21177974(MI:0225(ChIP-chip) and ChIP-seq)	null	modENCODE-24-JAN-11	http://www.modencode.org/White.shtml	2014-10-01	pd
FBgn0261434	FBgn0265778	hkb	PDZ-GEF	PDI: Transcription factor-Gene	0.3697	-	PDZ-GEF	hkb	21177974	http://www.ncbi.nlm.nih.gov/sites/entrez?cmd=retrieve&db=pubmed&list_uids=21177974&dopt=DocSum	http://www.modencode.org/White.shtml	21177974(MI:0225(ChIP-chip) and ChIP-seq)	null	modENCODE-24-JAN-11	http://www.modencode.org/White.shtml	2014-10-01	pd
FBgn0261434	FBgn0014023	hkb	mRpL47	PDI: Transcription factor-Gene	-0.169	-	mRpL47	hkb	21177974	http://www.ncbi.nlm.nih.gov/sites/entrez?cmd=retrieve&db=pubmed&list_uids=21177974&dopt=DocSum	http://www.modencode.org/White.shtml	21177974(MI:0225(ChIP-chip) and ChIP-seq)	null	modENCODE-24-JAN-11	http://www.modencode.org/White.shtml	2014-10-01	pd
FBgn0261434	FBgn0024432	hkb	Dlc90F	PDI: Transcription factor-Gene	0.5423	-	Dlc90F	hkb	21177974	http://www.ncbi.nlm.nih.gov/sites/entrez?cmd=retrieve&db=pubmed&list_uids=21177974&dopt=DocSum	http://www.modencode.org/White.shtml	21177974(MI:0225(ChIP-chip) and ChIP-seq)	null	modENCODE-24-JAN-11	http://www.modencode.org/White.shtml	2014-10-01	pd
FBgn0261434	FBgn0038745	hkb	CG4538	PDI: Transcription factor-Gene	-0.269	-	CG4538	hkb	21177974	http://www.ncbi.nlm.nih.gov/sites/entrez?cmd=retrieve&db=pubmed&list_uids=21177974&dopt=DocSum	http://www.modencode.org/White.shtml	21177974(MI:0225(ChIP-chip) and ChIP-seq)	null	modENCODE-24-JAN-11	http://www.modencode.org/White.shtml	2014-10-01	pd
FBgn0261434	FBgn0265574	hkb	Cdc5	PDI: Transcription factor-Gene	0.8119	-	Cdc5	hkb	21177974	http://www.ncbi.nlm.nih.gov/sites/entrez?cmd=retrieve&db=pubmed&list_uids=21177974&dopt=DocSum	http://www.modencode.org/White.shtml	21177974(MI:0225(ChIP-chip) and ChIP-seq)	null	modENCODE-24-JAN-11	http://www.modencode.org/White.shtml	2014-10-01	pd
FBgn0261434	FBgn0029706	hkb	CG3626	PDI: Transcription factor-Gene	-0.3274	-	CG3626	hkb	21177974	http://www.ncbi.nlm.nih.gov/sites/entrez?cmd=retrieve&db=pubmed&list_uids=21177974&dopt=DocSum	http://www.modencode.org/White.shtml	21177974(MI:0225(ChIP-chip) and ChIP-seq)	null	modENCODE-24-JAN-11	http://www.modencode.org/White.shtml	2014-10-01	pd
FBgn0261434	FBgn0038876	hkb	CG5919	PDI: Transcription factor-Gene	0.0818	-	CG5919	hkb	21177974	http://www.ncbi.nlm.nih.gov/sites/entrez?cmd=retrieve&db=pubmed&list_uids=21177974&dopt=DocSum	http://www.modencode.org/White.shtml	21177974(MI:0225(ChIP-chip) and ChIP-seq)	null	modENCODE-24-JAN-11	http://www.modencode.org/White.shtml	2014-10-01	pd
FBgn0261434	FBgn0012051	hkb	CalpA	PDI: Transcription factor-Gene	0.155	-	CalpA	hkb	21177974	http://www.ncbi.nlm.nih.gov/sites/entrez?cmd=retrieve&db=pubmed&list_uids=21177974&dopt=DocSum	http://www.modencode.org/White.shtml	21177974(MI:0225(ChIP-chip) and ChIP-seq)	null	modENCODE-24-JAN-11	http://www.modencode.org/White.shtml	2014-10-01	pd
FBgn0261434	FBgn0260990	hkb	yata	PDI: Transcription factor-Gene	-0.206	-	yata	hkb	21177974	http://www.ncbi.nlm.nih.gov/sites/entrez?cmd=retrieve&db=pubmed&list_uids=21177974&dopt=DocSum	http://www.modencode.org/White.shtml	21177974(MI:0225(ChIP-chip) and ChIP-seq)	null	modENCODE-24-JAN-11	http://www.modencode.org/White.shtml	2014-10-01	pd
FBgn0261434	FBgn0028327	hkb	l(1)G0320	PDI: Transcription factor-Gene	-0.0991	-	l(1)G0320	hkb	21177974	http://www.ncbi.nlm.nih.gov/sites/entrez?cmd=retrieve&db=pubmed&list_uids=21177974&dopt=DocSum	http://www.modencode.org/White.shtml	21177974(MI:0225(ChIP-chip) and ChIP-seq)	null	modENCODE-24-JAN-11	http://www.modencode.org/White.shtml	2014-10-01	pd
FBgn0261434	FBgn0001235	hkb	hth	PDI: Transcription factor-Gene	0.6413	-	hth	hkb	21177974	http://www.ncbi.nlm.nih.gov/sites/entrez?cmd=retrieve&db=pubmed&list_uids=21177974&dopt=DocSum	http://www.modencode.org/White.shtml	21177974(MI:0225(ChIP-chip) and ChIP-seq)	null	modENCODE-24-JAN-11	http://www.modencode.org/White.shtml	2014-10-01	pd
FBgn0261434	FBgn0025571	hkb	SF1	PDI: Transcription factor-Gene	0.6088	-	SF1	hkb	21177974	http://www.ncbi.nlm.nih.gov/sites/entrez?cmd=retrieve&db=pubmed&list_uids=21177974&dopt=DocSum	http://www.modencode.org/White.shtml	21177974(MI:0225(ChIP-chip) and ChIP-seq)	null	modENCODE-24-JAN-11	http://www.modencode.org/White.shtml	2014-10-01	pd
FBgn0261434	FBgn0034763	hkb	RYBP	PDI: Transcription factor-Gene	0.5532	-	RYBP	hkb	21177974	http://www.ncbi.nlm.nih.gov/sites/entrez?cmd=retrieve&db=pubmed&list_uids=21177974&dopt=DocSum	http://www.modencode.org/White.shtml	21177974(MI:0225(ChIP-chip) and ChIP-seq)	null	modENCODE-24-JAN-11	http://www.modencode.org/White.shtml	2014-10-01	pd
FBgn0261434	FBgn0042199	hkb	CG13713	PDI: Transcription factor-Gene	0.5862	-	CG13713	hkb	21177974	http://www.ncbi.nlm.nih.gov/sites/entrez?cmd=retrieve&db=pubmed&list_uids=21177974&dopt=DocSum	http://www.modencode.org/White.shtml	21177974(MI:0225(ChIP-chip) and ChIP-seq)	null	modENCODE-24-JAN-11	http://www.modencode.org/White.shtml	2014-10-01	pd
FBgn0261434	FBgn0033948	hkb	CG12863	PDI: Transcription factor-Gene	0.3295	-	CG12863	hkb	21177974	http://www.ncbi.nlm.nih.gov/sites/entrez?cmd=retrieve&db=pubmed&list_uids=21177974&dopt=DocSum	http://www.modencode.org/White.shtml	21177974(MI:0225(ChIP-chip) and ChIP-seq)	null	modENCODE-24-JAN-11	http://www.modencode.org/White.shtml	2014-10-01	pd
FBgn0261434	FBgn0040068	hkb	Vav	PDI: Transcription factor-Gene	0.2325	-	Vav	hkb	21177974	http://www.ncbi.nlm.nih.gov/sites/entrez?cmd=retrieve&db=pubmed&list_uids=21177974&dopt=DocSum	http://www.modencode.org/White.shtml	21177974(MI:0225(ChIP-chip) and ChIP-seq)	null	modENCODE-24-JAN-11	http://www.modencode.org/White.shtml	2014-10-01	pd
FBgn0261434	FBgn0027791	hkb	O-fut2	PDI: Transcription factor-Gene	0.2144	-	O-fut2	hkb	21177974	http://www.ncbi.nlm.nih.gov/sites/entrez?cmd=retrieve&db=pubmed&list_uids=21177974&dopt=DocSum	http://www.modencode.org/White.shtml	21177974(MI:0225(ChIP-chip) and ChIP-seq)	null	modENCODE-24-JAN-11	http://www.modencode.org/White.shtml	2014-10-01	pd
FBgn0261434	FBgn0033247	hkb	Nup44A	PDI: Transcription factor-Gene	0.463	-	Nup44A	hkb	21177974	http://www.ncbi.nlm.nih.gov/sites/entrez?cmd=retrieve&db=pubmed&list_uids=21177974&dopt=DocSum	http://www.modencode.org/White.shtml	21177974(MI:0225(ChIP-chip) and ChIP-seq)	null	modENCODE-24-JAN-11	http://www.modencode.org/White.shtml	2014-10-01	pd
FBgn0261434	FBgn0038889	hkb	Fancm	PDI: Transcription factor-Gene	-0.1127	-	Fancm	hkb	21177974	http://www.ncbi.nlm.nih.gov/sites/entrez?cmd=retrieve&db=pubmed&list_uids=21177974&dopt=DocSum	http://www.modencode.org/White.shtml	21177974(MI:0225(ChIP-chip) and ChIP-seq)	null	modENCODE-24-JAN-11	http://www.modencode.org/White.shtml	2014-10-01	pd
FBgn0261434	FBgn0003118	hkb	pnt	PDI: Transcription factor-Gene	0.725	-	pnt	hkb	21177974	http://www.ncbi.nlm.nih.gov/sites/entrez?cmd=retrieve&db=pubmed&list_uids=21177974&dopt=DocSum	http://www.modencode.org/White.shtml	21177974(MI:0225(ChIP-chip) and ChIP-seq)	null	modENCODE-24-JAN-11	http://www.modencode.org/White.shtml	2014-10-01	pd
FBgn0261434	FBgn0035203	hkb	CG9149	PDI: Transcription factor-Gene	-0.2195	-	CG9149	hkb	21177974	http://www.ncbi.nlm.nih.gov/sites/entrez?cmd=retrieve&db=pubmed&list_uids=21177974&dopt=DocSum	http://www.modencode.org/White.shtml	21177974(MI:0225(ChIP-chip) and ChIP-seq)	null	modENCODE-24-JAN-11	http://www.modencode.org/White.shtml	2014-10-01	pd
FBgn0261434	FBgn0013751	hkb	Awh	PDI: Transcription factor-Gene	0.1765	-	Awh	hkb	21177974	http://www.ncbi.nlm.nih.gov/sites/entrez?cmd=retrieve&db=pubmed&list_uids=21177974&dopt=DocSum	http://www.modencode.org/White.shtml	21177974(MI:0225(ChIP-chip) and ChIP-seq)	null	modENCODE-24-JAN-11	http://www.modencode.org/White.shtml	2014-10-01	pd
FBgn0261434	FBgn0038564	hkb	CG7785	PDI: Transcription factor-Gene	0.5875	-	CG7785	hkb	21177974	http://www.ncbi.nlm.nih.gov/sites/entrez?cmd=retrieve&db=pubmed&list_uids=21177974&dopt=DocSum	http://www.modencode.org/White.shtml	21177974(MI:0225(ChIP-chip) and ChIP-seq)	null	modENCODE-24-JAN-11	http://www.modencode.org/White.shtml	2014-10-01	pd
FBgn0261434	FBgn0013759	hkb	CASK	PDI: Transcription factor-Gene	0.0056	-	CASK	hkb	21177974	http://www.ncbi.nlm.nih.gov/sites/entrez?cmd=retrieve&db=pubmed&list_uids=21177974&dopt=DocSum	http://www.modencode.org/White.shtml	21177974(MI:0225(ChIP-chip) and ChIP-seq)	null	modENCODE-24-JAN-11	http://www.modencode.org/White.shtml	2014-10-01	pd
FBgn0261434	FBgn0052263	hkb	CG32263	PDI: Transcription factor-Gene	-0.1856	-	CG32263	hkb	21177974	http://www.ncbi.nlm.nih.gov/sites/entrez?cmd=retrieve&db=pubmed&list_uids=21177974&dopt=DocSum	http://www.modencode.org/White.shtml	21177974(MI:0225(ChIP-chip) and ChIP-seq)	null	modENCODE-24-JAN-11	http://www.modencode.org/White.shtml	2014-10-01	pd
FBgn0261434	FBgn0033229	hkb	CG12822	PDI: Transcription factor-Gene	0.2649	-	CG12822	hkb	21177974	http://www.ncbi.nlm.nih.gov/sites/entrez?cmd=retrieve&db=pubmed&list_uids=21177974&dopt=DocSum	http://www.modencode.org/White.shtml	21177974(MI:0225(ChIP-chip) and ChIP-seq)	null	modENCODE-24-JAN-11	http://www.modencode.org/White.shtml	2014-10-01	pd
FBgn0261434	FBgn0011606	hkb	Klp3A	PDI: Transcription factor-Gene	0.4364	-	Klp3A	hkb	21177974	http://www.ncbi.nlm.nih.gov/sites/entrez?cmd=retrieve&db=pubmed&list_uids=21177974&dopt=DocSum	http://www.modencode.org/White.shtml	21177974(MI:0225(ChIP-chip) and ChIP-seq)	null	modENCODE-24-JAN-11	http://www.modencode.org/White.shtml	2014-10-01	pd
FBgn0261434	FBgn0052268	hkb	Drsl6	PDI: Transcription factor-Gene	-0.0948	-	Drsl6	hkb	21177974	http://www.ncbi.nlm.nih.gov/sites/entrez?cmd=retrieve&db=pubmed&list_uids=21177974&dopt=DocSum	http://www.modencode.org/White.shtml	21177974(MI:0225(ChIP-chip) and ChIP-seq)	null	modENCODE-24-JAN-11	http://www.modencode.org/White.shtml	2014-10-01	pd
FBgn0261434	FBgn0038566	hkb	CG14317	PDI: Transcription factor-Gene	0.576	-	CG14317	hkb	21177974	http://www.ncbi.nlm.nih.gov/sites/entrez?cmd=retrieve&db=pubmed&list_uids=21177974&dopt=DocSum	http://www.modencode.org/White.shtml	21177974(MI:0225(ChIP-chip) and ChIP-seq)	null	modENCODE-24-JAN-11	http://www.modencode.org/White.shtml	2014-10-01	pd
FBgn0261434	FBgn0040079	hkb	pkaap	PDI: Transcription factor-Gene	0.3108	-	pkaap	hkb	21177974	http://www.ncbi.nlm.nih.gov/sites/entrez?cmd=retrieve&db=pubmed&list_uids=21177974&dopt=DocSum	http://www.modencode.org/White.shtml	21177974(MI:0225(ChIP-chip) and ChIP-seq)	null	modENCODE-24-JAN-11	http://www.modencode.org/White.shtml	2014-10-01	pd
FBgn0261434	FBgn0033232	hkb	CG12159	PDI: Transcription factor-Gene	-0.1902	-	CG12159	hkb	21177974	http://www.ncbi.nlm.nih.gov/sites/entrez?cmd=retrieve&db=pubmed&list_uids=21177974&dopt=DocSum	http://www.modencode.org/White.shtml	21177974(MI:0225(ChIP-chip) and ChIP-seq)	null	modENCODE-24-JAN-11	http://www.modencode.org/White.shtml	2014-10-01	pd
FBgn0261434	FBgn0265598	hkb	Bx	PDI: Transcription factor-Gene	-0.3563	-	Bx	hkb	21177974	http://www.ncbi.nlm.nih.gov/sites/entrez?cmd=retrieve&db=pubmed&list_uids=21177974&dopt=DocSum	http://www.modencode.org/White.shtml	21177974(MI:0225(ChIP-chip) and ChIP-seq)	null	modENCODE-24-JAN-11	http://www.modencode.org/White.shtml	2014-10-01	pd
FBgn0261434	FBgn0035488	hkb	CG11593	PDI: Transcription factor-Gene	0.5084	-	CG11593	hkb	21177974	http://www.ncbi.nlm.nih.gov/sites/entrez?cmd=retrieve&db=pubmed&list_uids=21177974&dopt=DocSum	http://www.modencode.org/White.shtml	21177974(MI:0225(ChIP-chip) and ChIP-seq)	null	modENCODE-24-JAN-11	http://www.modencode.org/White.shtml	2014-10-01	pd
FBgn0261434	FBgn0040070	hkb	Trx-2	PDI: Transcription factor-Gene	-0.3866	-	Trx-2	hkb	21177974	http://www.ncbi.nlm.nih.gov/sites/entrez?cmd=retrieve&db=pubmed&list_uids=21177974&dopt=DocSum	http://www.modencode.org/White.shtml	21177974(MI:0225(ChIP-chip) and ChIP-seq)	null	modENCODE-24-JAN-11	http://www.modencode.org/White.shtml	2014-10-01	pd
FBgn0261434	FBgn0038763	hkb	PIG-L	PDI: Transcription factor-Gene	-0.1686	-	CG4433	hkb	21177974	http://www.ncbi.nlm.nih.gov/sites/entrez?cmd=retrieve&db=pubmed&list_uids=21177974&dopt=DocSum	http://www.modencode.org/White.shtml	21177974(MI:0225(ChIP-chip) and ChIP-seq)	null	modENCODE-24-JAN-11	http://www.modencode.org/White.shtml	2014-10-01	pd
FBgn0261434	FBgn0038890	hkb	CG7956	PDI: Transcription factor-Gene	0.4097	-	CG7956	hkb	21177974	http://www.ncbi.nlm.nih.gov/sites/entrez?cmd=retrieve&db=pubmed&list_uids=21177974&dopt=DocSum	http://www.modencode.org/White.shtml	21177974(MI:0225(ChIP-chip) and ChIP-seq)	null	modENCODE-24-JAN-11	http://www.modencode.org/White.shtml	2014-10-01	pd
FBgn0261434	FBgn0002787	hkb	Rpn8	PDI: Transcription factor-Gene	-0.1349	-	Rpn8	hkb	21177974	http://www.ncbi.nlm.nih.gov/sites/entrez?cmd=retrieve&db=pubmed&list_uids=21177974&dopt=DocSum	http://www.modencode.org/White.shtml	21177974(MI:0225(ChIP-chip) and ChIP-seq)	null	modENCODE-24-JAN-11	http://www.modencode.org/White.shtml	2014-10-01	pd
FBgn0261434	FBgn0038893	hkb	Archease	PDI: Transcription factor-Gene	0.1604	-	CG6353	hkb	21177974	http://www.ncbi.nlm.nih.gov/sites/entrez?cmd=retrieve&db=pubmed&list_uids=21177974&dopt=DocSum	http://www.modencode.org/White.shtml	21177974(MI:0225(ChIP-chip) and ChIP-seq)	null	modENCODE-24-JAN-11	http://www.modencode.org/White.shtml	2014-10-01	pd
FBgn0261434	FBgn0013764	hkb	Chi	PDI: Transcription factor-Gene	0.5217	-	Chi	hkb	21177974	http://www.ncbi.nlm.nih.gov/sites/entrez?cmd=retrieve&db=pubmed&list_uids=21177974&dopt=DocSum	http://www.modencode.org/White.shtml	21177974(MI:0225(ChIP-chip) and ChIP-seq)	null	modENCODE-24-JAN-11	http://www.modencode.org/White.shtml	2014-10-01	pd
FBgn0261434	FBgn0033467	hkb	CG15863	PDI: Transcription factor-Gene	0.5454	-	CG15863	hkb	21177974	http://www.ncbi.nlm.nih.gov/sites/entrez?cmd=retrieve&db=pubmed&list_uids=21177974&dopt=DocSum	http://www.modencode.org/White.shtml	21177974(MI:0225(ChIP-chip) and ChIP-seq)	null	modENCODE-24-JAN-11	http://www.modencode.org/White.shtml	2014-10-01	pd
FBgn0261434	FBgn0011638	hkb	La	PDI: Transcription factor-Gene	0.3696	-	La	hkb	21177974	http://www.ncbi.nlm.nih.gov/sites/entrez?cmd=retrieve&db=pubmed&list_uids=21177974&dopt=DocSum	http://www.modencode.org/White.shtml	21177974(MI:0225(ChIP-chip) and ChIP-seq)	null	modENCODE-24-JAN-11	http://www.modencode.org/White.shtml	2014-10-01	pd
FBgn0261434	FBgn0039790	hkb	CG2246	PDI: Transcription factor-Gene	-0.2057	-	CG2246	hkb	21177974	http://www.ncbi.nlm.nih.gov/sites/entrez?cmd=retrieve&db=pubmed&list_uids=21177974&dopt=DocSum	http://www.modencode.org/White.shtml	21177974(MI:0225(ChIP-chip) and ChIP-seq)	null	modENCODE-24-JAN-11	http://www.modencode.org/White.shtml	2014-10-01	pd
FBgn0261434	FBgn0052296	hkb	Mrtf	PDI: Transcription factor-Gene	-0.0098	-	Mrtf	hkb	21177974	http://www.ncbi.nlm.nih.gov/sites/entrez?cmd=retrieve&db=pubmed&list_uids=21177974&dopt=DocSum	http://www.modencode.org/White.shtml	21177974(MI:0225(ChIP-chip) and ChIP-seq)	null	modENCODE-24-JAN-11	http://www.modencode.org/White.shtml	2014-10-01	pd
FBgn0261434	FBgn0025595	hkb	AkhR	PDI: Transcription factor-Gene	-0.4994	-	AkhR	hkb	21177974	http://www.ncbi.nlm.nih.gov/sites/entrez?cmd=retrieve&db=pubmed&list_uids=21177974&dopt=DocSum	http://www.modencode.org/White.shtml	21177974(MI:0225(ChIP-chip) and ChIP-seq)	null	modENCODE-24-JAN-11	http://www.modencode.org/White.shtml	2014-10-01	pd
FBgn0261434	FBgn0261444	hkb	CG3638	PDI: Transcription factor-Gene	0.5402	-	CG3638	hkb	21177974	http://www.ncbi.nlm.nih.gov/sites/entrez?cmd=retrieve&db=pubmed&list_uids=21177974&dopt=DocSum	http://www.modencode.org/White.shtml	21177974(MI:0225(ChIP-chip) and ChIP-seq)	null	modENCODE-24-JAN-11	http://www.modencode.org/White.shtml	2014-10-01	pd
FBgn0261434	FBgn0264001	hkb	bru3	PDI: Transcription factor-Gene	0.2205	-	bru-3	hkb	21177974	http://www.ncbi.nlm.nih.gov/sites/entrez?cmd=retrieve&db=pubmed&list_uids=21177974&dopt=DocSum	http://www.modencode.org/White.shtml	21177974(MI:0225(ChIP-chip) and ChIP-seq)	null	modENCODE-24-JAN-11	http://www.modencode.org/White.shtml	2014-10-01	pd
FBgn0261434	FBgn0052676	hkb	stx	PDI: Transcription factor-Gene	0.1014	-	CG32676	hkb	21177974	http://www.ncbi.nlm.nih.gov/sites/entrez?cmd=retrieve&db=pubmed&list_uids=21177974&dopt=DocSum	http://www.modencode.org/White.shtml	21177974(MI:0225(ChIP-chip) and ChIP-seq)	null	modENCODE-24-JAN-11	http://www.modencode.org/White.shtml	2014-10-01	pd
FBgn0261434	FBgn0261434	hkb	hkb	PDI: Transcription factor-Gene	1	-	hkb	hkb	21177974	http://www.ncbi.nlm.nih.gov/sites/entrez?cmd=retrieve&db=pubmed&list_uids=21177974&dopt=DocSum	http://www.modencode.org/White.shtml	21177974(MI:0225(ChIP-chip) and ChIP-seq)	null	modENCODE-24-JAN-11	http://www.modencode.org/White.shtml	2014-10-01	pd
FBgn0261434	FBgn0025790	hkb	TBPH	PDI: Transcription factor-Gene	0.7832	-	TBPH	hkb	21177974	http://www.ncbi.nlm.nih.gov/sites/entrez?cmd=retrieve&db=pubmed&list_uids=21177974&dopt=DocSum	http://www.modencode.org/White.shtml	21177974(MI:0225(ChIP-chip) and ChIP-seq)	null	modENCODE-24-JAN-11	http://www.modencode.org/White.shtml	2014-10-01	pd
FBgn0261434	FBgn0034503	hkb	MED8	PDI: Transcription factor-Gene	0.6235	-	MED8	hkb	21177974	http://www.ncbi.nlm.nih.gov/sites/entrez?cmd=retrieve&db=pubmed&list_uids=21177974&dopt=DocSum	http://www.modencode.org/White.shtml	21177974(MI:0225(ChIP-chip) and ChIP-seq)	null	modENCODE-24-JAN-11	http://www.modencode.org/White.shtml	2014-10-01	pd
FBgn0261434	FBgn0261437	hkb	CSN8	PDI: Transcription factor-Gene	0.6755	-	CSN8	hkb	21177974	http://www.ncbi.nlm.nih.gov/sites/entrez?cmd=retrieve&db=pubmed&list_uids=21177974&dopt=DocSum	http://www.modencode.org/White.shtml	21177974(MI:0225(ChIP-chip) and ChIP-seq)	null	modENCODE-24-JAN-11	http://www.modencode.org/White.shtml	2014-10-01	pd
FBgn0261434	FBgn0267378	hkb	sau	PDI: Transcription factor-Gene	0.0063	-	sau	hkb	21177974	http://www.ncbi.nlm.nih.gov/sites/entrez?cmd=retrieve&db=pubmed&list_uids=21177974&dopt=DocSum	http://www.modencode.org/White.shtml	21177974(MI:0225(ChIP-chip) and ChIP-seq)	null	modENCODE-24-JAN-11	http://www.modencode.org/White.shtml	2014-10-01	pd
FBgn0261434	FBgn0034901	hkb	CG11300	PDI: Transcription factor-Gene	-0.134	-	CG11300	hkb	21177974	http://www.ncbi.nlm.nih.gov/sites/entrez?cmd=retrieve&db=pubmed&list_uids=21177974&dopt=DocSum	http://www.modencode.org/White.shtml	21177974(MI:0225(ChIP-chip) and ChIP-seq)	null	modENCODE-24-JAN-11	http://www.modencode.org/White.shtml	2014-10-01	pd
FBgn0261434	FBgn0034902	hkb	CG5532	PDI: Transcription factor-Gene	-0.0709	-	CG5532	hkb	21177974	http://www.ncbi.nlm.nih.gov/sites/entrez?cmd=retrieve&db=pubmed&list_uids=21177974&dopt=DocSum	http://www.modencode.org/White.shtml	21177974(MI:0225(ChIP-chip) and ChIP-seq)	null	modENCODE-24-JAN-11	http://www.modencode.org/White.shtml	2014-10-01	pd
FBgn0261434	FBgn0033264	hkb	Nup50	PDI: Transcription factor-Gene	0.6176	-	Nup50	hkb	21177974	http://www.ncbi.nlm.nih.gov/sites/entrez?cmd=retrieve&db=pubmed&list_uids=21177974&dopt=DocSum	http://www.modencode.org/White.shtml	21177974(MI:0225(ChIP-chip) and ChIP-seq)	null	modENCODE-24-JAN-11	http://www.modencode.org/White.shtml	2014-10-01	pd
FBgn0261434	FBgn0034326	hkb	CG18540	PDI: Transcription factor-Gene	-0.1321	-	CG18540	hkb	21177974	http://www.ncbi.nlm.nih.gov/sites/entrez?cmd=retrieve&db=pubmed&list_uids=21177974&dopt=DocSum	http://www.modencode.org/White.shtml	21177974(MI:0225(ChIP-chip) and ChIP-seq)	null	modENCODE-24-JAN-11	http://www.modencode.org/White.shtml	2014-10-01	pd
FBgn0261434	FBgn0032635	hkb	CG15141	PDI: Transcription factor-Gene	0.7752	-	CG15141	hkb	21177974	http://www.ncbi.nlm.nih.gov/sites/entrez?cmd=retrieve&db=pubmed&list_uids=21177974&dopt=DocSum	http://www.modencode.org/White.shtml	21177974(MI:0225(ChIP-chip) and ChIP-seq)	null	modENCODE-24-JAN-11	http://www.modencode.org/White.shtml	2014-10-01	pd
FBgn0261434	FBgn0032634	hkb	Rpb11	PDI: Transcription factor-Gene	0.7489	-	Rpb11	hkb	21177974	http://www.ncbi.nlm.nih.gov/sites/entrez?cmd=retrieve&db=pubmed&list_uids=21177974&dopt=DocSum	http://www.modencode.org/White.shtml	21177974(MI:0225(ChIP-chip) and ChIP-seq)	null	modENCODE-24-JAN-11	http://www.modencode.org/White.shtml	2014-10-01	pd
FBgn0261434	FBgn0031906	hkb	CG5160	PDI: Transcription factor-Gene	-0.1687	-	CG5160	hkb	21177974	http://www.ncbi.nlm.nih.gov/sites/entrez?cmd=retrieve&db=pubmed&list_uids=21177974&dopt=DocSum	http://www.modencode.org/White.shtml	21177974(MI:0225(ChIP-chip) and ChIP-seq)	null	modENCODE-24-JAN-11	http://www.modencode.org/White.shtml	2014-10-01	pd
FBgn0261434	FBgn0053523	hkb	CG33523	PDI: Transcription factor-Gene	-0.2694	-	Vap-33B	hkb	21177974	http://www.ncbi.nlm.nih.gov/sites/entrez?cmd=retrieve&db=pubmed&list_uids=21177974&dopt=DocSum	http://www.modencode.org/White.shtml	21177974(MI:0225(ChIP-chip) and ChIP-seq)	null	modENCODE-24-JAN-11	http://www.modencode.org/White.shtml	2014-10-01	pd
FBgn0261434	FBgn0266916	hkb	Cenp-C	PDI: Transcription factor-Gene	0.447	-	Cenp-C	hkb	21177974	http://www.ncbi.nlm.nih.gov/sites/entrez?cmd=retrieve&db=pubmed&list_uids=21177974&dopt=DocSum	http://www.modencode.org/White.shtml	21177974(MI:0225(ChIP-chip) and ChIP-seq)	null	modENCODE-24-JAN-11	http://www.modencode.org/White.shtml	2014-10-01	pd
FBgn0261434	FBgn0029094	hkb	asf1	PDI: Transcription factor-Gene	0.5014	-	asf1	hkb	21177974	http://www.ncbi.nlm.nih.gov/sites/entrez?cmd=retrieve&db=pubmed&list_uids=21177974&dopt=DocSum	http://www.modencode.org/White.shtml	21177974(MI:0225(ChIP-chip) and ChIP-seq)	null	modENCODE-24-JAN-11	http://www.modencode.org/White.shtml	2014-10-01	pd
FBgn0261434	FBgn0037900	hkb	CG5276	PDI: Transcription factor-Gene	-0.1315	-	CG5276	hkb	21177974	http://www.ncbi.nlm.nih.gov/sites/entrez?cmd=retrieve&db=pubmed&list_uids=21177974&dopt=DocSum	http://www.modencode.org/White.shtml	21177974(MI:0225(ChIP-chip) and ChIP-seq)	null	modENCODE-24-JAN-11	http://www.modencode.org/White.shtml	2014-10-01	pd
FBgn0261434	FBgn0260944	hkb	Rbp1	PDI: Transcription factor-Gene	0.8394	-	Rbp1	hkb	21177974	http://www.ncbi.nlm.nih.gov/sites/entrez?cmd=retrieve&db=pubmed&list_uids=21177974&dopt=DocSum	http://www.modencode.org/White.shtml	21177974(MI:0225(ChIP-chip) and ChIP-seq)	null	modENCODE-24-JAN-11	http://www.modencode.org/White.shtml	2014-10-01	pd
FBgn0261434	FBgn0002524	hkb	lace	PDI: Transcription factor-Gene	-0.0288	-	lace	hkb	21177974	http://www.ncbi.nlm.nih.gov/sites/entrez?cmd=retrieve&db=pubmed&list_uids=21177974&dopt=DocSum	http://www.modencode.org/White.shtml	21177974(MI:0225(ChIP-chip) and ChIP-seq)	null	modENCODE-24-JAN-11	http://www.modencode.org/White.shtml	2014-10-01	pd
FBgn0261434	FBgn0052280	hkb	CG32280	PDI: Transcription factor-Gene	-0.3143	-	CG32280	hkb	21177974	http://www.ncbi.nlm.nih.gov/sites/entrez?cmd=retrieve&db=pubmed&list_uids=21177974&dopt=DocSum	http://www.modencode.org/White.shtml	21177974(MI:0225(ChIP-chip) and ChIP-seq)	null	modENCODE-24-JAN-11	http://www.modencode.org/White.shtml	2014-10-01	pd
FBgn0261434	FBgn0034504	hkb	CG8929	PDI: Transcription factor-Gene	0.8286	-	CG8929	hkb	21177974	http://www.ncbi.nlm.nih.gov/sites/entrez?cmd=retrieve&db=pubmed&list_uids=21177974&dopt=DocSum	http://www.modencode.org/White.shtml	21177974(MI:0225(ChIP-chip) and ChIP-seq)	null	modENCODE-24-JAN-11	http://www.modencode.org/White.shtml	2014-10-01	pd
FBgn0261434	FBgn0260745	hkb	mfas	PDI: Transcription factor-Gene	-0.1543	-	mfas	hkb	21177974	http://www.ncbi.nlm.nih.gov/sites/entrez?cmd=retrieve&db=pubmed&list_uids=21177974&dopt=DocSum	http://www.modencode.org/White.shtml	21177974(MI:0225(ChIP-chip) and ChIP-seq)	null	modENCODE-24-JAN-11	http://www.modencode.org/White.shtml	2014-10-01	pd
FBgn0261434	FBgn0029888	hkb	ND-ASHI	PDI: Transcription factor-Gene	-0.219	-	ND-ASHI	hkb	21177974	http://www.ncbi.nlm.nih.gov/sites/entrez?cmd=retrieve&db=pubmed&list_uids=21177974&dopt=DocSum	http://www.modencode.org/White.shtml	21177974(MI:0225(ChIP-chip) and ChIP-seq)	null	modENCODE-24-JAN-11	http://www.modencode.org/White.shtml	2014-10-01	pd
FBgn0261434	FBgn0260741	hkb	CG3281	PDI: Transcription factor-Gene	0.5008	-	CG3281	hkb	21177974	http://www.ncbi.nlm.nih.gov/sites/entrez?cmd=retrieve&db=pubmed&list_uids=21177974&dopt=DocSum	http://www.modencode.org/White.shtml	21177974(MI:0225(ChIP-chip) and ChIP-seq)	null	modENCODE-24-JAN-11	http://www.modencode.org/White.shtml	2014-10-01	pd
FBgn0261434	FBgn0034514	hkb	CG13427	PDI: Transcription factor-Gene	0.9412	-	CG13427	hkb	21177974	http://www.ncbi.nlm.nih.gov/sites/entrez?cmd=retrieve&db=pubmed&list_uids=21177974&dopt=DocSum	http://www.modencode.org/White.shtml	21177974(MI:0225(ChIP-chip) and ChIP-seq)	null	modENCODE-24-JAN-11	http://www.modencode.org/White.shtml	2014-10-01	pd
FBgn0261434	FBgn0029740	hkb	CG12680	PDI: Transcription factor-Gene	-0.1939	-	CG12680	hkb	21177974	http://www.ncbi.nlm.nih.gov/sites/entrez?cmd=retrieve&db=pubmed&list_uids=21177974&dopt=DocSum	http://www.modencode.org/White.shtml	21177974(MI:0225(ChIP-chip) and ChIP-seq)	null	modENCODE-24-JAN-11	http://www.modencode.org/White.shtml	2014-10-01	pd
FBgn0261434	FBgn0051958	hkb	CR31958	PDI: Transcription factor-Gene	-0.3095	-	CG31958	hkb	21177974	http://www.ncbi.nlm.nih.gov/sites/entrez?cmd=retrieve&db=pubmed&list_uids=21177974&dopt=DocSum	http://www.modencode.org/White.shtml	21177974(MI:0225(ChIP-chip) and ChIP-seq)	null	modENCODE-24-JAN-11	http://www.modencode.org/White.shtml	2014-10-01	pd
FBgn0261434	FBgn0038788	hkb	Sirt2	PDI: Transcription factor-Gene	-0.038	-	Sirt2	hkb	21177974	http://www.ncbi.nlm.nih.gov/sites/entrez?cmd=retrieve&db=pubmed&list_uids=21177974&dopt=DocSum	http://www.modencode.org/White.shtml	21177974(MI:0225(ChIP-chip) and ChIP-seq)	null	modENCODE-24-JAN-11	http://www.modencode.org/White.shtml	2014-10-01	pd
FBgn0261434	FBgn0087035	hkb	AGO2	PDI: Transcription factor-Gene	0.0835	-	AGO2	hkb	21177974	http://www.ncbi.nlm.nih.gov/sites/entrez?cmd=retrieve&db=pubmed&list_uids=21177974&dopt=DocSum	http://www.modencode.org/White.shtml	21177974(MI:0225(ChIP-chip) and ChIP-seq)	null	modENCODE-24-JAN-11	http://www.modencode.org/White.shtml	2014-10-01	pd
FBgn0261434	FBgn0002985	hkb	odd	PDI: Transcription factor-Gene	0.4875	-	odd	hkb	21177974	http://www.ncbi.nlm.nih.gov/sites/entrez?cmd=retrieve&db=pubmed&list_uids=21177974&dopt=DocSum	http://www.modencode.org/White.shtml	21177974(MI:0225(ChIP-chip) and ChIP-seq)	null	modENCODE-24-JAN-11	http://www.modencode.org/White.shtml	2014-10-01	pd
FBgn0261434	FBgn0038787	hkb	CG4360	PDI: Transcription factor-Gene	0.442	-	CG4360	hkb	21177974	http://www.ncbi.nlm.nih.gov/sites/entrez?cmd=retrieve&db=pubmed&list_uids=21177974&dopt=DocSum	http://www.modencode.org/White.shtml	21177974(MI:0225(ChIP-chip) and ChIP-seq)	null	modENCODE-24-JAN-11	http://www.modencode.org/White.shtml	2014-10-01	pd
FBgn0261434	FBgn0052484	hkb	Sk2	PDI: Transcription factor-Gene	0.1801	-	Sk2	hkb	21177974	http://www.ncbi.nlm.nih.gov/sites/entrez?cmd=retrieve&db=pubmed&list_uids=21177974&dopt=DocSum	http://www.modencode.org/White.shtml	21177974(MI:0225(ChIP-chip) and ChIP-seq)	null	modENCODE-24-JAN-11	http://www.modencode.org/White.shtml	2014-10-01	pd
FBgn0261434	FBgn0051950	hkb	Sbat	PDI: Transcription factor-Gene	0.2311	-	CG31950	hkb	21177974	http://www.ncbi.nlm.nih.gov/sites/entrez?cmd=retrieve&db=pubmed&list_uids=21177974&dopt=DocSum	http://www.modencode.org/White.shtml	21177974(MI:0225(ChIP-chip) and ChIP-seq)	null	modENCODE-24-JAN-11	http://www.modencode.org/White.shtml	2014-10-01	pd
FBgn0261434	FBgn0033485	hkb	RpLP0-like	PDI: Transcription factor-Gene	0.3805	-	RpLP0-like	hkb	21177974	http://www.ncbi.nlm.nih.gov/sites/entrez?cmd=retrieve&db=pubmed&list_uids=21177974&dopt=DocSum	http://www.modencode.org/White.shtml	21177974(MI:0225(ChIP-chip) and ChIP-seq)	null	modENCODE-24-JAN-11	http://www.modencode.org/White.shtml	2014-10-01	pd
FBgn0261434	FBgn0053558	hkb	mim	PDI: Transcription factor-Gene	0.0553	-	mim	hkb	21177974	http://www.ncbi.nlm.nih.gov/sites/entrez?cmd=retrieve&db=pubmed&list_uids=21177974&dopt=DocSum	http://www.modencode.org/White.shtml	21177974(MI:0225(ChIP-chip) and ChIP-seq)	null	modENCODE-24-JAN-11	http://www.modencode.org/White.shtml	2014-10-01	pd
FBgn0261434	FBgn0029708	hkb	CG3556	PDI: Transcription factor-Gene	0.0119	-	CG3556	hkb	21177974	http://www.ncbi.nlm.nih.gov/sites/entrez?cmd=retrieve&db=pubmed&list_uids=21177974&dopt=DocSum	http://www.modencode.org/White.shtml	21177974(MI:0225(ChIP-chip) and ChIP-seq)	null	modENCODE-24-JAN-11	http://www.modencode.org/White.shtml	2014-10-01	pd
FBgn0261434	FBgn0051523	hkb	CG31523	PDI: Transcription factor-Gene	-0.2538	-	CG31523	hkb	21177974	http://www.ncbi.nlm.nih.gov/sites/entrez?cmd=retrieve&db=pubmed&list_uids=21177974&dopt=DocSum	http://www.modencode.org/White.shtml	21177974(MI:0225(ChIP-chip) and ChIP-seq)	null	modENCODE-24-JAN-11	http://www.modencode.org/White.shtml	2014-10-01	pd
FBgn0261434	FBgn0033481	hkb	CG12920	PDI: Transcription factor-Gene	-0.0537	-	CG12920	hkb	21177974	http://www.ncbi.nlm.nih.gov/sites/entrez?cmd=retrieve&db=pubmed&list_uids=21177974&dopt=DocSum	http://www.modencode.org/White.shtml	21177974(MI:0225(ChIP-chip) and ChIP-seq)	null	modENCODE-24-JAN-11	http://www.modencode.org/White.shtml	2014-10-01	pd
FBgn0261434	FBgn0086361	hkb	alph	PDI: Transcription factor-Gene	0.8573	-	alph	hkb	21177974	http://www.ncbi.nlm.nih.gov/sites/entrez?cmd=retrieve&db=pubmed&list_uids=21177974&dopt=DocSum	http://www.modencode.org/White.shtml	21177974(MI:0225(ChIP-chip) and ChIP-seq)	null	modENCODE-24-JAN-11	http://www.modencode.org/White.shtml	2014-10-01	pd
FBgn0261434	FBgn0031129	hkb	CG1324	PDI: Transcription factor-Gene	-0.1857	-	CG1324	hkb	21177974	http://www.ncbi.nlm.nih.gov/sites/entrez?cmd=retrieve&db=pubmed&list_uids=21177974&dopt=DocSum	http://www.modencode.org/White.shtml	21177974(MI:0225(ChIP-chip) and ChIP-seq)	null	modENCODE-24-JAN-11	http://www.modencode.org/White.shtml	2014-10-01	pd
FBgn0261434	FBgn0013799	hkb	Deaf1	PDI: Transcription factor-Gene	0.5185	-	Deaf1	hkb	21177974	http://www.ncbi.nlm.nih.gov/sites/entrez?cmd=retrieve&db=pubmed&list_uids=21177974&dopt=DocSum	http://www.modencode.org/White.shtml	21177974(MI:0225(ChIP-chip) and ChIP-seq)	null	modENCODE-24-JAN-11	http://www.modencode.org/White.shtml	2014-10-01	pd
FBgn0261434	FBgn0086359	hkb	Invadolysin	PDI: Transcription factor-Gene	0.0229	-	Invadolysin	hkb	21177974	http://www.ncbi.nlm.nih.gov/sites/entrez?cmd=retrieve&db=pubmed&list_uids=21177974&dopt=DocSum	http://www.modencode.org/White.shtml	21177974(MI:0225(ChIP-chip) and ChIP-seq)	null	modENCODE-24-JAN-11	http://www.modencode.org/White.shtml	2014-10-01	pd
FBgn0261434	FBgn0029899	hkb	CG14438	PDI: Transcription factor-Gene	0.7489	-	CG14438	hkb	21177974	http://www.ncbi.nlm.nih.gov/sites/entrez?cmd=retrieve&db=pubmed&list_uids=21177974&dopt=DocSum	http://www.modencode.org/White.shtml	21177974(MI:0225(ChIP-chip) and ChIP-seq)	null	modENCODE-24-JAN-11	http://www.modencode.org/White.shtml	2014-10-01	pd
FBgn0261434	FBgn0034716	hkb	Oatp58Dc	PDI: Transcription factor-Gene	0.2536	-	Oatp58Dc	hkb	21177974	http://www.ncbi.nlm.nih.gov/sites/entrez?cmd=retrieve&db=pubmed&list_uids=21177974&dopt=DocSum	http://www.modencode.org/White.shtml	21177974(MI:0225(ChIP-chip) and ChIP-seq)	null	modENCODE-24-JAN-11	http://www.modencode.org/White.shtml	2014-10-01	pd
FBgn0261434	FBgn0029895	hkb	CG14441	PDI: Transcription factor-Gene	0.0089	-	CG14441	hkb	21177974	http://www.ncbi.nlm.nih.gov/sites/entrez?cmd=retrieve&db=pubmed&list_uids=21177974&dopt=DocSum	http://www.modencode.org/White.shtml	21177974(MI:0225(ChIP-chip) and ChIP-seq)	null	modENCODE-24-JAN-11	http://www.modencode.org/White.shtml	2014-10-01	pd
FBgn0261434	FBgn0021814	hkb	Vps28	PDI: Transcription factor-Gene	-0.1082	-	Vps28	hkb	21177974	http://www.ncbi.nlm.nih.gov/sites/entrez?cmd=retrieve&db=pubmed&list_uids=21177974&dopt=DocSum	http://www.modencode.org/White.shtml	21177974(MI:0225(ChIP-chip) and ChIP-seq)	null	modENCODE-24-JAN-11	http://www.modencode.org/White.shtml	2014-10-01	pd
FBgn0261434	FBgn0002973	hkb	numb	PDI: Transcription factor-Gene	0.3288	-	numb	hkb	21177974	http://www.ncbi.nlm.nih.gov/sites/entrez?cmd=retrieve&db=pubmed&list_uids=21177974&dopt=DocSum	http://www.modencode.org/White.shtml	21177974(MI:0225(ChIP-chip) and ChIP-seq)	null	modENCODE-24-JAN-11	http://www.modencode.org/White.shtml	2014-10-01	pd
FBgn0261434	FBgn0051729	hkb	CG31729	PDI: Transcription factor-Gene	-0.0542	-	CG31729	hkb	21177974	http://www.ncbi.nlm.nih.gov/sites/entrez?cmd=retrieve&db=pubmed&list_uids=21177974&dopt=DocSum	http://www.modencode.org/White.shtml	21177974(MI:0225(ChIP-chip) and ChIP-seq)	null	modENCODE-24-JAN-11	http://www.modencode.org/White.shtml	2014-10-01	pd
FBgn0261434	FBgn0016701	hkb	Rab4	PDI: Transcription factor-Gene	-0.1652	-	Rab4	hkb	21177974	http://www.ncbi.nlm.nih.gov/sites/entrez?cmd=retrieve&db=pubmed&list_uids=21177974&dopt=DocSum	http://www.modencode.org/White.shtml	21177974(MI:0225(ChIP-chip) and ChIP-seq)	null	modENCODE-24-JAN-11	http://www.modencode.org/White.shtml	2014-10-01	pd
FBgn0261434	FBgn0011661	hkb	Moe	PDI: Transcription factor-Gene	-0.4789	-	Moe	hkb	21177974	http://www.ncbi.nlm.nih.gov/sites/entrez?cmd=retrieve&db=pubmed&list_uids=21177974&dopt=DocSum	http://www.modencode.org/White.shtml	21177974(MI:0225(ChIP-chip) and ChIP-seq)	null	modENCODE-24-JAN-11	http://www.modencode.org/White.shtml	2014-10-01	pd
FBgn0261434	FBgn0040765	hkb	luna	PDI: Transcription factor-Gene	0.3995	-	luna	hkb	21177974	http://www.ncbi.nlm.nih.gov/sites/entrez?cmd=retrieve&db=pubmed&list_uids=21177974&dopt=DocSum	http://www.modencode.org/White.shtml	21177974(MI:0225(ChIP-chip) and ChIP-seq)	null	modENCODE-24-JAN-11	http://www.modencode.org/White.shtml	2014-10-01	pd
FBgn0261434	FBgn0029891	hkb	Pink1	PDI: Transcription factor-Gene	-0.2208	-	Pink1	hkb	21177974	http://www.ncbi.nlm.nih.gov/sites/entrez?cmd=retrieve&db=pubmed&list_uids=21177974&dopt=DocSum	http://www.modencode.org/White.shtml	21177974(MI:0225(ChIP-chip) and ChIP-seq)	null	modENCODE-24-JAN-11	http://www.modencode.org/White.shtml	2014-10-01	pd
FBgn0261434	FBgn0261014	hkb	TER94	PDI: Transcription factor-Gene	-0.1016	-	TER94	hkb	21177974	http://www.ncbi.nlm.nih.gov/sites/entrez?cmd=retrieve&db=pubmed&list_uids=21177974&dopt=DocSum	http://www.modencode.org/White.shtml	21177974(MI:0225(ChIP-chip) and ChIP-seq)	null	modENCODE-24-JAN-11	http://www.modencode.org/White.shtml	2014-10-01	pd
FBgn0261434	FBgn0086710	hkb	RpL30	PDI: Transcription factor-Gene	0.07	-	RpL30	hkb	21177974	http://www.ncbi.nlm.nih.gov/sites/entrez?cmd=retrieve&db=pubmed&list_uids=21177974&dopt=DocSum	http://www.modencode.org/White.shtml	21177974(MI:0225(ChIP-chip) and ChIP-seq)	null	modENCODE-24-JAN-11	http://www.modencode.org/White.shtml	2014-10-01	pd
FBgn0261434	FBgn0033475	hkb	CG12129	PDI: Transcription factor-Gene	0.4029	-	CG12129	hkb	21177974	http://www.ncbi.nlm.nih.gov/sites/entrez?cmd=retrieve&db=pubmed&list_uids=21177974&dopt=DocSum	http://www.modencode.org/White.shtml	21177974(MI:0225(ChIP-chip) and ChIP-seq)	null	modENCODE-24-JAN-11	http://www.modencode.org/White.shtml	2014-10-01	pd
FBgn0261434	FBgn0038524	hkb	sll	PDI: Transcription factor-Gene	0.1801	-	sll	hkb	21177974	http://www.ncbi.nlm.nih.gov/sites/entrez?cmd=retrieve&db=pubmed&list_uids=21177974&dopt=DocSum	http://www.modencode.org/White.shtml	21177974(MI:0225(ChIP-chip) and ChIP-seq)	null	modENCODE-24-JAN-11	http://www.modencode.org/White.shtml	2014-10-01	pd
FBgn0261434	FBgn0087008	hkb	e(y)3	PDI: Transcription factor-Gene	0.5198	-	e(y)3	hkb	21177974	http://www.ncbi.nlm.nih.gov/sites/entrez?cmd=retrieve&db=pubmed&list_uids=21177974&dopt=DocSum	http://www.modencode.org/White.shtml	21177974(MI:0225(ChIP-chip) and ChIP-seq)	null	modENCODE-24-JAN-11	http://www.modencode.org/White.shtml	2014-10-01	pd
FBgn0261434	FBgn0002736	hkb	mago	PDI: Transcription factor-Gene	0.7459	-	mago	hkb	21177974	http://www.ncbi.nlm.nih.gov/sites/entrez?cmd=retrieve&db=pubmed&list_uids=21177974&dopt=DocSum	http://www.modencode.org/White.shtml	21177974(MI:0225(ChIP-chip) and ChIP-seq)	null	modENCODE-24-JAN-11	http://www.modencode.org/White.shtml	2014-10-01	pd
FBgn0261434	FBgn0037007	hkb	CG5059	PDI: Transcription factor-Gene	0.0355	-	CG5059	hkb	21177974	http://www.ncbi.nlm.nih.gov/sites/entrez?cmd=retrieve&db=pubmed&list_uids=21177974&dopt=DocSum	http://www.modencode.org/White.shtml	21177974(MI:0225(ChIP-chip) and ChIP-seq)	null	modENCODE-24-JAN-11	http://www.modencode.org/White.shtml	2014-10-01	pd
FBgn0261434	FBgn0034919	hkb	CG5569	PDI: Transcription factor-Gene	-0.2152	-	CG5569	hkb	21177974	http://www.ncbi.nlm.nih.gov/sites/entrez?cmd=retrieve&db=pubmed&list_uids=21177974&dopt=DocSum	http://www.modencode.org/White.shtml	21177974(MI:0225(ChIP-chip) and ChIP-seq)	null	modENCODE-24-JAN-11	http://www.modencode.org/White.shtml	2014-10-01	pd
FBgn0261434	FBgn0015663	hkb	Dot	PDI: Transcription factor-Gene	-0.3963	-	Dot	hkb	21177974	http://www.ncbi.nlm.nih.gov/sites/entrez?cmd=retrieve&db=pubmed&list_uids=21177974&dopt=DocSum	http://www.modencode.org/White.shtml	21177974(MI:0225(ChIP-chip) and ChIP-seq)	null	modENCODE-24-JAN-11	http://www.modencode.org/White.shtml	2014-10-01	pd
FBgn0261434	FBgn0034530	hkb	Rcd6	PDI: Transcription factor-Gene	-0.1207	-	Rcd6	hkb	21177974	http://www.ncbi.nlm.nih.gov/sites/entrez?cmd=retrieve&db=pubmed&list_uids=21177974&dopt=DocSum	http://www.modencode.org/White.shtml	21177974(MI:0225(ChIP-chip) and ChIP-seq)	null	modENCODE-24-JAN-11	http://www.modencode.org/White.shtml	2014-10-01	pd
FBgn0261434	FBgn0034725	hkb	CG6044	PDI: Transcription factor-Gene	-0.0895	-	CG6044	hkb	21177974	http://www.ncbi.nlm.nih.gov/sites/entrez?cmd=retrieve&db=pubmed&list_uids=21177974&dopt=DocSum	http://www.modencode.org/White.shtml	21177974(MI:0225(ChIP-chip) and ChIP-seq)	null	modENCODE-24-JAN-11	http://www.modencode.org/White.shtml	2014-10-01	pd
FBgn0261434	FBgn0051974	hkb	CG31974	PDI: Transcription factor-Gene	-0.247	-	CG31974	hkb	21177974	http://www.ncbi.nlm.nih.gov/sites/entrez?cmd=retrieve&db=pubmed&list_uids=21177974&dopt=DocSum	http://www.modencode.org/White.shtml	21177974(MI:0225(ChIP-chip) and ChIP-seq)	null	modENCODE-24-JAN-11	http://www.modencode.org/White.shtml	2014-10-01	pd
FBgn0261434	FBgn0034315	hkb	CG5721	PDI: Transcription factor-Gene	-0.1137	-	CG5721	hkb	21177974	http://www.ncbi.nlm.nih.gov/sites/entrez?cmd=retrieve&db=pubmed&list_uids=21177974&dopt=DocSum	http://www.modencode.org/White.shtml	21177974(MI:0225(ChIP-chip) and ChIP-seq)	null	modENCODE-24-JAN-11	http://www.modencode.org/White.shtml	2014-10-01	pd
FBgn0261434	FBgn0011653	hkb	mas	PDI: Transcription factor-Gene	0.8233	-	mas	hkb	21177974	http://www.ncbi.nlm.nih.gov/sites/entrez?cmd=retrieve&db=pubmed&list_uids=21177974&dopt=DocSum	http://www.modencode.org/White.shtml	21177974(MI:0225(ChIP-chip) and ChIP-seq)	null	modENCODE-24-JAN-11	http://www.modencode.org/White.shtml	2014-10-01	pd
FBgn0261434	FBgn0040752	hkb	Prosap	PDI: Transcription factor-Gene	0.3274	-	Prosap	hkb	21177974	http://www.ncbi.nlm.nih.gov/sites/entrez?cmd=retrieve&db=pubmed&list_uids=21177974&dopt=DocSum	http://www.modencode.org/White.shtml	21177974(MI:0225(ChIP-chip) and ChIP-seq)	null	modENCODE-24-JAN-11	http://www.modencode.org/White.shtml	2014-10-01	pd
FBgn0261434	FBgn0027093	hkb	ArgRS	PDI: Transcription factor-Gene	-0.0163	-	Aats-arg	hkb	21177974	http://www.ncbi.nlm.nih.gov/sites/entrez?cmd=retrieve&db=pubmed&list_uids=21177974&dopt=DocSum	http://www.modencode.org/White.shtml	21177974(MI:0225(ChIP-chip) and ChIP-seq)	null	modENCODE-24-JAN-11	http://www.modencode.org/White.shtml	2014-10-01	pd
FBgn0261434	FBgn0034312	hkb	CG10916	PDI: Transcription factor-Gene	-0.338	-	CG10916	hkb	21177974	http://www.ncbi.nlm.nih.gov/sites/entrez?cmd=retrieve&db=pubmed&list_uids=21177974&dopt=DocSum	http://www.modencode.org/White.shtml	21177974(MI:0225(ChIP-chip) and ChIP-seq)	null	modENCODE-24-JAN-11	http://www.modencode.org/White.shtml	2014-10-01	pd
FBgn0261434	FBgn0029079	hkb	icln	PDI: Transcription factor-Gene	0.5277	-	icln	hkb	21177974	http://www.ncbi.nlm.nih.gov/sites/entrez?cmd=retrieve&db=pubmed&list_uids=21177974&dopt=DocSum	http://www.modencode.org/White.shtml	21177974(MI:0225(ChIP-chip) and ChIP-seq)	null	modENCODE-24-JAN-11	http://www.modencode.org/White.shtml	2014-10-01	pd
FBgn0261434	FBgn0001297	hkb	kay	PDI: Transcription factor-Gene	-0.3472	-	kay	hkb	21177974	http://www.ncbi.nlm.nih.gov/sites/entrez?cmd=retrieve&db=pubmed&list_uids=21177974&dopt=DocSum	http://www.modencode.org/White.shtml	21177974(MI:0225(ChIP-chip) and ChIP-seq)	null	modENCODE-24-JAN-11	http://www.modencode.org/White.shtml	2014-10-01	pd
FBgn0261434	FBgn0028343	hkb	Ankle2	PDI: Transcription factor-Gene	0.434	-	Ankle2	hkb	21177974	http://www.ncbi.nlm.nih.gov/sites/entrez?cmd=retrieve&db=pubmed&list_uids=21177974&dopt=DocSum	http://www.modencode.org/White.shtml	21177974(MI:0225(ChIP-chip) and ChIP-seq)	null	modENCODE-24-JAN-11	http://www.modencode.org/White.shtml	2014-10-01	pd
FBgn0261434	FBgn0261791	hkb	SNRPG	PDI: Transcription factor-Gene	0.7348	-	SNRPG	hkb	21177974	http://www.ncbi.nlm.nih.gov/sites/entrez?cmd=retrieve&db=pubmed&list_uids=21177974&dopt=DocSum	http://www.modencode.org/White.shtml	21177974(MI:0225(ChIP-chip) and ChIP-seq)	null	modENCODE-24-JAN-11	http://www.modencode.org/White.shtml	2014-10-01	pd
FBgn0261434	FBgn0031435	hkb	Elba2	PDI: Transcription factor-Gene	0.3164	-	Elba2	hkb	21177974	http://www.ncbi.nlm.nih.gov/sites/entrez?cmd=retrieve&db=pubmed&list_uids=21177974&dopt=DocSum	http://www.modencode.org/White.shtml	21177974(MI:0225(ChIP-chip) and ChIP-seq)	null	modENCODE-24-JAN-11	http://www.modencode.org/White.shtml	2014-10-01	pd
FBgn0261434	FBgn0002941	hkb	slou	PDI: Transcription factor-Gene	0.4443	-	slou	hkb	21177974	http://www.ncbi.nlm.nih.gov/sites/entrez?cmd=retrieve&db=pubmed&list_uids=21177974&dopt=DocSum	http://www.modencode.org/White.shtml	21177974(MI:0225(ChIP-chip) and ChIP-seq)	null	modENCODE-24-JAN-11	http://www.modencode.org/White.shtml	2014-10-01	pd
FBgn0261434	FBgn0037937	hkb	Fer3	PDI: Transcription factor-Gene	0.4338	-	Fer3	hkb	21177974	http://www.ncbi.nlm.nih.gov/sites/entrez?cmd=retrieve&db=pubmed&list_uids=21177974&dopt=DocSum	http://www.modencode.org/White.shtml	21177974(MI:0225(ChIP-chip) and ChIP-seq)	null	modENCODE-24-JAN-11	http://www.modencode.org/White.shtml	2014-10-01	pd
FBgn0261434	FBgn0026575	hkb	hang	PDI: Transcription factor-Gene	0.7505	-	hang	hkb	21177974	http://www.ncbi.nlm.nih.gov/sites/entrez?cmd=retrieve&db=pubmed&list_uids=21177974&dopt=DocSum	http://www.modencode.org/White.shtml	21177974(MI:0225(ChIP-chip) and ChIP-seq)	null	modENCODE-24-JAN-11	http://www.modencode.org/White.shtml	2014-10-01	pd
FBgn0261434	FBgn0004855	hkb	RpII15	PDI: Transcription factor-Gene	0.5205	-	RpII15	hkb	21177974	http://www.ncbi.nlm.nih.gov/sites/entrez?cmd=retrieve&db=pubmed&list_uids=21177974&dopt=DocSum	http://www.modencode.org/White.shtml	21177974(MI:0225(ChIP-chip) and ChIP-seq)	null	modENCODE-24-JAN-11	http://www.modencode.org/White.shtml	2014-10-01	pd
FBgn0261434	FBgn0033032	hkb	kune	PDI: Transcription factor-Gene	0.189	-	kune	hkb	21177974	http://www.ncbi.nlm.nih.gov/sites/entrez?cmd=retrieve&db=pubmed&list_uids=21177974&dopt=DocSum	http://www.modencode.org/White.shtml	21177974(MI:0225(ChIP-chip) and ChIP-seq)	null	modENCODE-24-JAN-11	http://www.modencode.org/White.shtml	2014-10-01	pd
FBgn0261434	FBgn0011674	hkb	insc	PDI: Transcription factor-Gene	0.54	-	insc	hkb	21177974	http://www.ncbi.nlm.nih.gov/sites/entrez?cmd=retrieve&db=pubmed&list_uids=21177974&dopt=DocSum	http://www.modencode.org/White.shtml	21177974(MI:0225(ChIP-chip) and ChIP-seq)	null	modENCODE-24-JAN-11	http://www.modencode.org/White.shtml	2014-10-01	pd
FBgn0261434	FBgn0004856	hkb	Bx42	PDI: Transcription factor-Gene	0.703	-	Bx42	hkb	21177974	http://www.ncbi.nlm.nih.gov/sites/entrez?cmd=retrieve&db=pubmed&list_uids=21177974&dopt=DocSum	http://www.modencode.org/White.shtml	21177974(MI:0225(ChIP-chip) and ChIP-seq)	null	modENCODE-24-JAN-11	http://www.modencode.org/White.shtml	2014-10-01	pd
FBgn0261434	FBgn0033033	hkb	scaf	PDI: Transcription factor-Gene	-0.1733	-	scaf	hkb	21177974	http://www.ncbi.nlm.nih.gov/sites/entrez?cmd=retrieve&db=pubmed&list_uids=21177974&dopt=DocSum	http://www.modencode.org/White.shtml	21177974(MI:0225(ChIP-chip) and ChIP-seq)	null	modENCODE-24-JAN-11	http://www.modencode.org/White.shtml	2014-10-01	pd
FBgn0261434	FBgn0029664	hkb	CG10802	PDI: Transcription factor-Gene	0.1152	-	CG10802	hkb	21177974	http://www.ncbi.nlm.nih.gov/sites/entrez?cmd=retrieve&db=pubmed&list_uids=21177974&dopt=DocSum	http://www.modencode.org/White.shtml	21177974(MI:0225(ChIP-chip) and ChIP-seq)	null	modENCODE-24-JAN-11	http://www.modencode.org/White.shtml	2014-10-01	pd
FBgn0261434	FBgn0029969	hkb	CG10932	PDI: Transcription factor-Gene	-0.3152	-	CG10932	hkb	21177974	http://www.ncbi.nlm.nih.gov/sites/entrez?cmd=retrieve&db=pubmed&list_uids=21177974&dopt=DocSum	http://www.modencode.org/White.shtml	21177974(MI:0225(ChIP-chip) and ChIP-seq)	null	modENCODE-24-JAN-11	http://www.modencode.org/White.shtml	2014-10-01	pd
FBgn0261434	FBgn0029663	hkb	CG10804	PDI: Transcription factor-Gene	0.0293	-	CG10804	hkb	21177974	http://www.ncbi.nlm.nih.gov/sites/entrez?cmd=retrieve&db=pubmed&list_uids=21177974&dopt=DocSum	http://www.modencode.org/White.shtml	21177974(MI:0225(ChIP-chip) and ChIP-seq)	null	modENCODE-24-JAN-11	http://www.modencode.org/White.shtml	2014-10-01	pd
FBgn0261434	FBgn0036405	hkb	CG6833	PDI: Transcription factor-Gene	0.3473	-	CG6833	hkb	21177974	http://www.ncbi.nlm.nih.gov/sites/entrez?cmd=retrieve&db=pubmed&list_uids=21177974&dopt=DocSum	http://www.modencode.org/White.shtml	21177974(MI:0225(ChIP-chip) and ChIP-seq)	null	modENCODE-24-JAN-11	http://www.modencode.org/White.shtml	2014-10-01	pd
FBgn0261434	FBgn0266111	hkb	ana3	PDI: Transcription factor-Gene	0.3998	-	ana3	hkb	21177974	http://www.ncbi.nlm.nih.gov/sites/entrez?cmd=retrieve&db=pubmed&list_uids=21177974&dopt=DocSum	http://www.modencode.org/White.shtml	21177974(MI:0225(ChIP-chip) and ChIP-seq)	null	modENCODE-24-JAN-11	http://www.modencode.org/White.shtml	2014-10-01	pd
FBgn0261434	FBgn0036402	hkb	CG6650	PDI: Transcription factor-Gene	0.1112	-	CG6650	hkb	21177974	http://www.ncbi.nlm.nih.gov/sites/entrez?cmd=retrieve&db=pubmed&list_uids=21177974&dopt=DocSum	http://www.modencode.org/White.shtml	21177974(MI:0225(ChIP-chip) and ChIP-seq)	null	modENCODE-24-JAN-11	http://www.modencode.org/White.shtml	2014-10-01	pd
FBgn0261434	FBgn0003997	hkb	hid	PDI: Transcription factor-Gene	-0.0001	-	hid	hkb	21177974	http://www.ncbi.nlm.nih.gov/sites/entrez?cmd=retrieve&db=pubmed&list_uids=21177974&dopt=DocSum	http://www.modencode.org/White.shtml	21177974(MI:0225(ChIP-chip) and ChIP-seq)	null	modENCODE-24-JAN-11	http://www.modencode.org/White.shtml	2014-10-01	pd
FBgn0261434	FBgn0033812	hkb	Pex13	PDI: Transcription factor-Gene	-0.2421	-	Pex13	hkb	21177974	http://www.ncbi.nlm.nih.gov/sites/entrez?cmd=retrieve&db=pubmed&list_uids=21177974&dopt=DocSum	http://www.modencode.org/White.shtml	21177974(MI:0225(ChIP-chip) and ChIP-seq)	null	modENCODE-24-JAN-11	http://www.modencode.org/White.shtml	2014-10-01	pd
FBgn0261434	FBgn0031820	hkb	Daxx	PDI: Transcription factor-Gene	0.4037	-	Daxx	hkb	21177974	http://www.ncbi.nlm.nih.gov/sites/entrez?cmd=retrieve&db=pubmed&list_uids=21177974&dopt=DocSum	http://www.modencode.org/White.shtml	21177974(MI:0225(ChIP-chip) and ChIP-seq)	null	modENCODE-24-JAN-11	http://www.modencode.org/White.shtml	2014-10-01	pd
FBgn0261434	FBgn0033813	hkb	fsd	PDI: Transcription factor-Gene	-0.053	-	fsd	hkb	21177974	http://www.ncbi.nlm.nih.gov/sites/entrez?cmd=retrieve&db=pubmed&list_uids=21177974&dopt=DocSum	http://www.modencode.org/White.shtml	21177974(MI:0225(ChIP-chip) and ChIP-seq)	null	modENCODE-24-JAN-11	http://www.modencode.org/White.shtml	2014-10-01	pd
FBgn0261434	FBgn0014861	hkb	Mcm2	PDI: Transcription factor-Gene	0.6295	-	Mcm2	hkb	21177974	http://www.ncbi.nlm.nih.gov/sites/entrez?cmd=retrieve&db=pubmed&list_uids=21177974&dopt=DocSum	http://www.modencode.org/White.shtml	21177974(MI:0225(ChIP-chip) and ChIP-seq)	null	modENCODE-24-JAN-11	http://www.modencode.org/White.shtml	2014-10-01	pd
FBgn0261434	FBgn0261788	hkb	Ank2	PDI: Transcription factor-Gene	0.6736	-	Ank2	hkb	21177974	http://www.ncbi.nlm.nih.gov/sites/entrez?cmd=retrieve&db=pubmed&list_uids=21177974&dopt=DocSum	http://www.modencode.org/White.shtml	21177974(MI:0225(ChIP-chip) and ChIP-seq)	null	modENCODE-24-JAN-11	http://www.modencode.org/White.shtml	2014-10-01	pd
FBgn0261434	FBgn0028789	hkb	Doc1	PDI: Transcription factor-Gene	0.4555	-	Doc1	hkb	21177974	http://www.ncbi.nlm.nih.gov/sites/entrez?cmd=retrieve&db=pubmed&list_uids=21177974&dopt=DocSum	http://www.modencode.org/White.shtml	21177974(MI:0225(ChIP-chip) and ChIP-seq)	null	modENCODE-24-JAN-11	http://www.modencode.org/White.shtml	2014-10-01	pd
FBgn0261434	FBgn0031161	hkb	CG15445	PDI: Transcription factor-Gene	-0.232	-	CG15445	hkb	21177974	http://www.ncbi.nlm.nih.gov/sites/entrez?cmd=retrieve&db=pubmed&list_uids=21177974&dopt=DocSum	http://www.modencode.org/White.shtml	21177974(MI:0225(ChIP-chip) and ChIP-seq)	null	modENCODE-24-JAN-11	http://www.modencode.org/White.shtml	2014-10-01	pd
FBgn0261434	FBgn0015222	hkb	Fer1HCH	PDI: Transcription factor-Gene	-0.2993	-	Fer1HCH	hkb	21177974	http://www.ncbi.nlm.nih.gov/sites/entrez?cmd=retrieve&db=pubmed&list_uids=21177974&dopt=DocSum	http://www.modencode.org/White.shtml	21177974(MI:0225(ChIP-chip) and ChIP-seq)	null	modENCODE-24-JAN-11	http://www.modencode.org/White.shtml	2014-10-01	pd
FBgn0261434	FBgn0020386	hkb	Pdk1	PDI: Transcription factor-Gene	0.0436	-	Pdk1	hkb	21177974	http://www.ncbi.nlm.nih.gov/sites/entrez?cmd=retrieve&db=pubmed&list_uids=21177974&dopt=DocSum	http://www.modencode.org/White.shtml	21177974(MI:0225(ChIP-chip) and ChIP-seq)	null	modENCODE-24-JAN-11	http://www.modencode.org/White.shtml	2014-10-01	pd
FBgn0261434	FBgn0015221	hkb	Fer2LCH	PDI: Transcription factor-Gene	-0.3242	-	Fer2LCH	hkb	21177974	http://www.ncbi.nlm.nih.gov/sites/entrez?cmd=retrieve&db=pubmed&list_uids=21177974&dopt=DocSum	http://www.modencode.org/White.shtml	21177974(MI:0225(ChIP-chip) and ChIP-seq)	null	modENCODE-24-JAN-11	http://www.modencode.org/White.shtml	2014-10-01	pd
FBgn0261434	FBgn0014869	hkb	Pglym78	PDI: Transcription factor-Gene	-0.3269	-	Pglym78	hkb	21177974	http://www.ncbi.nlm.nih.gov/sites/entrez?cmd=retrieve&db=pubmed&list_uids=21177974&dopt=DocSum	http://www.modencode.org/White.shtml	21177974(MI:0225(ChIP-chip) and ChIP-seq)	null	modENCODE-24-JAN-11	http://www.modencode.org/White.shtml	2014-10-01	pd
FBgn0261434	FBgn0086655	hkb	jing	PDI: Transcription factor-Gene	0.673	-	jing	hkb	21177974	http://www.ncbi.nlm.nih.gov/sites/entrez?cmd=retrieve&db=pubmed&list_uids=21177974&dopt=DocSum	http://www.modencode.org/White.shtml	21177974(MI:0225(ChIP-chip) and ChIP-seq)	null	modENCODE-24-JAN-11	http://www.modencode.org/White.shtml	2014-10-01	pd
FBgn0261434	FBgn0029067	hkb	Dd	PDI: Transcription factor-Gene	0.7769	-	Dd	hkb	21177974	http://www.ncbi.nlm.nih.gov/sites/entrez?cmd=retrieve&db=pubmed&list_uids=21177974&dopt=DocSum	http://www.modencode.org/White.shtml	21177974(MI:0225(ChIP-chip) and ChIP-seq)	null	modENCODE-24-JAN-11	http://www.modencode.org/White.shtml	2014-10-01	pd
FBgn0261434	FBgn0266101	hkb	CG44838	PDI: Transcription factor-Gene	0.4064	-	CG44838	hkb	21177974	http://www.ncbi.nlm.nih.gov/sites/entrez?cmd=retrieve&db=pubmed&list_uids=21177974&dopt=DocSum	http://www.modencode.org/White.shtml	21177974(MI:0225(ChIP-chip) and ChIP-seq)	null	modENCODE-24-JAN-11	http://www.modencode.org/White.shtml	2014-10-01	pd
FBgn0261434	FBgn0036688	hkb	Fit2	PDI: Transcription factor-Gene	-0.0468	-	Fit2	hkb	21177974	http://www.ncbi.nlm.nih.gov/sites/entrez?cmd=retrieve&db=pubmed&list_uids=21177974&dopt=DocSum	http://www.modencode.org/White.shtml	21177974(MI:0225(ChIP-chip) and ChIP-seq)	null	modENCODE-24-JAN-11	http://www.modencode.org/White.shtml	2014-10-01	pd
FBgn0261434	FBgn0031149	hkb	Stt3A	PDI: Transcription factor-Gene	0.5018	-	CG1518	hkb	21177974	http://www.ncbi.nlm.nih.gov/sites/entrez?cmd=retrieve&db=pubmed&list_uids=21177974&dopt=DocSum	http://www.modencode.org/White.shtml	21177974(MI:0225(ChIP-chip) and ChIP-seq)	null	modENCODE-24-JAN-11	http://www.modencode.org/White.shtml	2014-10-01	pd
FBgn0261434	FBgn0260655	hkb	l(3)76BDm	PDI: Transcription factor-Gene	0.2866	-	l(3)76BDm	hkb	21177974	http://www.ncbi.nlm.nih.gov/sites/entrez?cmd=retrieve&db=pubmed&list_uids=21177974&dopt=DocSum	http://www.modencode.org/White.shtml	21177974(MI:0225(ChIP-chip) and ChIP-seq)	null	modENCODE-24-JAN-11	http://www.modencode.org/White.shtml	2014-10-01	pd
FBgn0261434	FBgn0003310	hkb	S	PDI: Transcription factor-Gene	0.389	-	S	hkb	21177974	http://www.ncbi.nlm.nih.gov/sites/entrez?cmd=retrieve&db=pubmed&list_uids=21177974&dopt=DocSum	http://www.modencode.org/White.shtml	21177974(MI:0225(ChIP-chip) and ChIP-seq)	null	modENCODE-24-JAN-11	http://www.modencode.org/White.shtml	2014-10-01	pd
FBgn0261434	FBgn0034542	hkb	Fem-1	PDI: Transcription factor-Gene	-0.3296	-	Fem-1	hkb	21177974	http://www.ncbi.nlm.nih.gov/sites/entrez?cmd=retrieve&db=pubmed&list_uids=21177974&dopt=DocSum	http://www.modencode.org/White.shtml	21177974(MI:0225(ChIP-chip) and ChIP-seq)	null	modENCODE-24-JAN-11	http://www.modencode.org/White.shtml	2014-10-01	pd
FBgn0261434	FBgn0003719	hkb	tld	PDI: Transcription factor-Gene	0.8259	-	tld	hkb	21177974	http://www.ncbi.nlm.nih.gov/sites/entrez?cmd=retrieve&db=pubmed&list_uids=21177974&dopt=DocSum	http://www.modencode.org/White.shtml	21177974(MI:0225(ChIP-chip) and ChIP-seq)	null	modENCODE-24-JAN-11	http://www.modencode.org/White.shtml	2014-10-01	pd
FBgn0261434	FBgn0037544	hkb	CG11035	PDI: Transcription factor-Gene	-0.1619	-	CG11035	hkb	21177974	http://www.ncbi.nlm.nih.gov/sites/entrez?cmd=retrieve&db=pubmed&list_uids=21177974&dopt=DocSum	http://www.modencode.org/White.shtml	21177974(MI:0225(ChIP-chip) and ChIP-seq)	null	modENCODE-24-JAN-11	http://www.modencode.org/White.shtml	2014-10-01	pd
FBgn0261434	FBgn0260659	hkb	CG42542	PDI: Transcription factor-Gene	-0.3831	-	CG42542	hkb	21177974	http://www.ncbi.nlm.nih.gov/sites/entrez?cmd=retrieve&db=pubmed&list_uids=21177974&dopt=DocSum	http://www.modencode.org/White.shtml	21177974(MI:0225(ChIP-chip) and ChIP-seq)	null	modENCODE-24-JAN-11	http://www.modencode.org/White.shtml	2014-10-01	pd
FBgn0261434	FBgn0003720	hkb	tll	PDI: Transcription factor-Gene	0.88	-	tll	hkb	21177974	http://www.ncbi.nlm.nih.gov/sites/entrez?cmd=retrieve&db=pubmed&list_uids=21177974&dopt=DocSum	http://www.modencode.org/White.shtml	21177974(MI:0225(ChIP-chip) and ChIP-seq)	null	modENCODE-24-JAN-11	http://www.modencode.org/White.shtml	2014-10-01	pd
FBgn0261434	FBgn0015351	hkb	CG14906	PDI: Transcription factor-Gene	0.6504	-	CG14906	hkb	21177974	http://www.ncbi.nlm.nih.gov/sites/entrez?cmd=retrieve&db=pubmed&list_uids=21177974&dopt=DocSum	http://www.modencode.org/White.shtml	21177974(MI:0225(ChIP-chip) and ChIP-seq)	null	modENCODE-24-JAN-11	http://www.modencode.org/White.shtml	2014-10-01	pd
FBgn0261434	FBgn0041789	hkb	Pax	PDI: Transcription factor-Gene	-0.2171	-	Pax	hkb	21177974	http://www.ncbi.nlm.nih.gov/sites/entrez?cmd=retrieve&db=pubmed&list_uids=21177974&dopt=DocSum	http://www.modencode.org/White.shtml	21177974(MI:0225(ChIP-chip) and ChIP-seq)	null	modENCODE-24-JAN-11	http://www.modencode.org/White.shtml	2014-10-01	pd
FBgn0261434	FBgn0031836	hkb	CG11050	PDI: Transcription factor-Gene	0.3698	-	CG11050	hkb	21177974	http://www.ncbi.nlm.nih.gov/sites/entrez?cmd=retrieve&db=pubmed&list_uids=21177974&dopt=DocSum	http://www.modencode.org/White.shtml	21177974(MI:0225(ChIP-chip) and ChIP-seq)	null	modENCODE-24-JAN-11	http://www.modencode.org/White.shtml	2014-10-01	pd
FBgn0261434	FBgn0014870	hkb	Psi	PDI: Transcription factor-Gene	0.8948	-	Psi	hkb	21177974	http://www.ncbi.nlm.nih.gov/sites/entrez?cmd=retrieve&db=pubmed&list_uids=21177974&dopt=DocSum	http://www.modencode.org/White.shtml	21177974(MI:0225(ChIP-chip) and ChIP-seq)	null	modENCODE-24-JAN-11	http://www.modencode.org/White.shtml	2014-10-01	pd
FBgn0261434	FBgn0061515	hkb	endos	PDI: Transcription factor-Gene	0.0237	-	endos	hkb	21177974	http://www.ncbi.nlm.nih.gov/sites/entrez?cmd=retrieve&db=pubmed&list_uids=21177974&dopt=DocSum	http://www.modencode.org/White.shtml	21177974(MI:0225(ChIP-chip) and ChIP-seq)	null	modENCODE-24-JAN-11	http://www.modencode.org/White.shtml	2014-10-01	pd
FBgn0261434	FBgn0004838	hkb	Hrb27C	PDI: Transcription factor-Gene	0.515	-	Hrb27C	hkb	21177974	http://www.ncbi.nlm.nih.gov/sites/entrez?cmd=retrieve&db=pubmed&list_uids=21177974&dopt=DocSum	http://www.modencode.org/White.shtml	21177974(MI:0225(ChIP-chip) and ChIP-seq)	null	modENCODE-24-JAN-11	http://www.modencode.org/White.shtml	2014-10-01	pd
FBgn0261434	FBgn0261799	hkb	dsx-c73A	PDI: Transcription factor-Gene	-0.0927	-	dsx-c73A	hkb	21177974	http://www.ncbi.nlm.nih.gov/sites/entrez?cmd=retrieve&db=pubmed&list_uids=21177974&dopt=DocSum	http://www.modencode.org/White.shtml	21177974(MI:0225(ChIP-chip) and ChIP-seq)	null	modENCODE-24-JAN-11	http://www.modencode.org/White.shtml	2014-10-01	pd
FBgn0261434	FBgn0261797	hkb	Dhc64C	PDI: Transcription factor-Gene	-0.0846	-	Dhc64C	hkb	21177974	http://www.ncbi.nlm.nih.gov/sites/entrez?cmd=retrieve&db=pubmed&list_uids=21177974&dopt=DocSum	http://www.modencode.org/White.shtml	21177974(MI:0225(ChIP-chip) and ChIP-seq)	null	modENCODE-24-JAN-11	http://www.modencode.org/White.shtml	2014-10-01	pd
FBgn0261434	FBgn0014879	hkb	Set	PDI: Transcription factor-Gene	0.8059	-	Set	hkb	21177974	http://www.ncbi.nlm.nih.gov/sites/entrez?cmd=retrieve&db=pubmed&list_uids=21177974&dopt=DocSum	http://www.modencode.org/White.shtml	21177974(MI:0225(ChIP-chip) and ChIP-seq)	null	modENCODE-24-JAN-11	http://www.modencode.org/White.shtml	2014-10-01	pd
FBgn0261434	FBgn0031434	hkb	insv	PDI: Transcription factor-Gene	0.6294	-	insv	hkb	21177974	http://www.ncbi.nlm.nih.gov/sites/entrez?cmd=retrieve&db=pubmed&list_uids=21177974&dopt=DocSum	http://www.modencode.org/White.shtml	21177974(MI:0225(ChIP-chip) and ChIP-seq)	null	modENCODE-24-JAN-11	http://www.modencode.org/White.shtml	2014-10-01	pd
FBgn0261434	FBgn0031150	hkb	bves	PDI: Transcription factor-Gene	0.0663	-	bves	hkb	21177974	http://www.ncbi.nlm.nih.gov/sites/entrez?cmd=retrieve&db=pubmed&list_uids=21177974&dopt=DocSum	http://www.modencode.org/White.shtml	21177974(MI:0225(ChIP-chip) and ChIP-seq)	null	modENCODE-24-JAN-11	http://www.modencode.org/White.shtml	2014-10-01	pd
FBgn0261434	FBgn0030329	hkb	prtp	PDI: Transcription factor-Gene	-0.0317	-	prtp	hkb	21177974	http://www.ncbi.nlm.nih.gov/sites/entrez?cmd=retrieve&db=pubmed&list_uids=21177974&dopt=DocSum	http://www.modencode.org/White.shtml	21177974(MI:0225(ChIP-chip) and ChIP-seq)	null	modENCODE-24-JAN-11	http://www.modencode.org/White.shtml	2014-10-01	pd
FBgn0261434	FBgn0026597	hkb	Axn	PDI: Transcription factor-Gene	0.8087	-	Axn	hkb	21177974	http://www.ncbi.nlm.nih.gov/sites/entrez?cmd=retrieve&db=pubmed&list_uids=21177974&dopt=DocSum	http://www.modencode.org/White.shtml	21177974(MI:0225(ChIP-chip) and ChIP-seq)	null	modENCODE-24-JAN-11	http://www.modencode.org/White.shtml	2014-10-01	pd
FBgn0261434	FBgn0260243	hkb	E(var)3-9	PDI: Transcription factor-Gene	0.3765	-	E(var)3-9	hkb	21177974	http://www.ncbi.nlm.nih.gov/sites/entrez?cmd=retrieve&db=pubmed&list_uids=21177974&dopt=DocSum	http://www.modencode.org/White.shtml	21177974(MI:0225(ChIP-chip) and ChIP-seq)	null	modENCODE-24-JAN-11	http://www.modencode.org/White.shtml	2014-10-01	pd
FBgn0261434	FBgn0031458	hkb	aph-1	PDI: Transcription factor-Gene	0.4775	-	aph-1	hkb	21177974	http://www.ncbi.nlm.nih.gov/sites/entrez?cmd=retrieve&db=pubmed&list_uids=21177974&dopt=DocSum	http://www.modencode.org/White.shtml	21177974(MI:0225(ChIP-chip) and ChIP-seq)	null	modENCODE-24-JAN-11	http://www.modencode.org/White.shtml	2014-10-01	pd
FBgn0261434	FBgn0031457	hkb	CG3077	PDI: Transcription factor-Gene	-0.1228	-	CG3077	hkb	21177974	http://www.ncbi.nlm.nih.gov/sites/entrez?cmd=retrieve&db=pubmed&list_uids=21177974&dopt=DocSum	http://www.modencode.org/White.shtml	21177974(MI:0225(ChIP-chip) and ChIP-seq)	null	modENCODE-24-JAN-11	http://www.modencode.org/White.shtml	2014-10-01	pd
FBgn0261434	FBgn0261065	hkb	Cpsf73	PDI: Transcription factor-Gene	0.5548	-	Cpsf73	hkb	21177974	http://www.ncbi.nlm.nih.gov/sites/entrez?cmd=retrieve&db=pubmed&list_uids=21177974&dopt=DocSum	http://www.modencode.org/White.shtml	21177974(MI:0225(ChIP-chip) and ChIP-seq)	null	modENCODE-24-JAN-11	http://www.modencode.org/White.shtml	2014-10-01	pd
FBgn0261434	FBgn0031851	hkb	Aatf	PDI: Transcription factor-Gene	0.5157	-	Aatf	hkb	21177974	http://www.ncbi.nlm.nih.gov/sites/entrez?cmd=retrieve&db=pubmed&list_uids=21177974&dopt=DocSum	http://www.modencode.org/White.shtml	21177974(MI:0225(ChIP-chip) and ChIP-seq)	null	modENCODE-24-JAN-11	http://www.modencode.org/White.shtml	2014-10-01	pd
FBgn0261434	FBgn0015380	hkb	drl	PDI: Transcription factor-Gene	0.663	-	drl	hkb	21177974	http://www.ncbi.nlm.nih.gov/sites/entrez?cmd=retrieve&db=pubmed&list_uids=21177974&dopt=DocSum	http://www.modencode.org/White.shtml	21177974(MI:0225(ChIP-chip) and ChIP-seq)	null	modENCODE-24-JAN-11	http://www.modencode.org/White.shtml	2014-10-01	pd
FBgn0261434	FBgn0014366	hkb	noi	PDI: Transcription factor-Gene	0.7395	-	noi	hkb	21177974	http://www.ncbi.nlm.nih.gov/sites/entrez?cmd=retrieve&db=pubmed&list_uids=21177974&dopt=DocSum	http://www.modencode.org/White.shtml	21177974(MI:0225(ChIP-chip) and ChIP-seq)	null	modENCODE-24-JAN-11	http://www.modencode.org/White.shtml	2014-10-01	pd
FBgn0261434	FBgn0052039	hkb	CG32039	PDI: Transcription factor-Gene	-0.2162	-	CG32039	hkb	21177974	http://www.ncbi.nlm.nih.gov/sites/entrez?cmd=retrieve&db=pubmed&list_uids=21177974&dopt=DocSum	http://www.modencode.org/White.shtml	21177974(MI:0225(ChIP-chip) and ChIP-seq)	null	modENCODE-24-JAN-11	http://www.modencode.org/White.shtml	2014-10-01	pd
FBgn0261434	FBgn0040297	hkb	Nhe2	PDI: Transcription factor-Gene	0.2054	-	Nhe2	hkb	21177974	http://www.ncbi.nlm.nih.gov/sites/entrez?cmd=retrieve&db=pubmed&list_uids=21177974&dopt=DocSum	http://www.modencode.org/White.shtml	21177974(MI:0225(ChIP-chip) and ChIP-seq)	null	modENCODE-24-JAN-11	http://www.modencode.org/White.shtml	2014-10-01	pd
FBgn0261434	FBgn0263987	hkb	spoon	PDI: Transcription factor-Gene	0.4107	-	spoon	hkb	21177974	http://www.ncbi.nlm.nih.gov/sites/entrez?cmd=retrieve&db=pubmed&list_uids=21177974&dopt=DocSum	http://www.modencode.org/White.shtml	21177974(MI:0225(ChIP-chip) and ChIP-seq)	null	modENCODE-24-JAN-11	http://www.modencode.org/White.shtml	2014-10-01	pd
FBgn0261434	FBgn0032305	hkb	CG6700	PDI: Transcription factor-Gene	0.4314	-	CG6700	hkb	21177974	http://www.ncbi.nlm.nih.gov/sites/entrez?cmd=retrieve&db=pubmed&list_uids=21177974&dopt=DocSum	http://www.modencode.org/White.shtml	21177974(MI:0225(ChIP-chip) and ChIP-seq)	null	modENCODE-24-JAN-11	http://www.modencode.org/White.shtml	2014-10-01	pd
FBgn0261434	FBgn0086447	hkb	l(2)37Cg	PDI: Transcription factor-Gene	0.2549	-	l(2)37Cg	hkb	21177974	http://www.ncbi.nlm.nih.gov/sites/entrez?cmd=retrieve&db=pubmed&list_uids=21177974&dopt=DocSum	http://www.modencode.org/White.shtml	21177974(MI:0225(ChIP-chip) and ChIP-seq)	null	modENCODE-24-JAN-11	http://www.modencode.org/White.shtml	2014-10-01	pd
FBgn0261434	FBgn0003079	hkb	Raf	PDI: Transcription factor-Gene	0.7028	-	Raf	hkb	21177974	http://www.ncbi.nlm.nih.gov/sites/entrez?cmd=retrieve&db=pubmed&list_uids=21177974&dopt=DocSum	http://www.modencode.org/White.shtml	21177974(MI:0225(ChIP-chip) and ChIP-seq)	null	modENCODE-24-JAN-11	http://www.modencode.org/White.shtml	2014-10-01	pd
FBgn0261434	FBgn0002932	hkb	neur	PDI: Transcription factor-Gene	0.8979	-	neur	hkb	21177974	http://www.ncbi.nlm.nih.gov/sites/entrez?cmd=retrieve&db=pubmed&list_uids=21177974&dopt=DocSum	http://www.modencode.org/White.shtml	21177974(MI:0225(ChIP-chip) and ChIP-seq)	null	modENCODE-24-JAN-11	http://www.modencode.org/White.shtml	2014-10-01	pd
FBgn0261434	FBgn0029970	hkb	Nek2	PDI: Transcription factor-Gene	0.4963	-	Nek2	hkb	21177974	http://www.ncbi.nlm.nih.gov/sites/entrez?cmd=retrieve&db=pubmed&list_uids=21177974&dopt=DocSum	http://www.modencode.org/White.shtml	21177974(MI:0225(ChIP-chip) and ChIP-seq)	null	modENCODE-24-JAN-11	http://www.modencode.org/White.shtml	2014-10-01	pd
FBgn0261434	FBgn0003076	hkb	Pgm	PDI: Transcription factor-Gene	-0.3828	-	Pgm	hkb	21177974	http://www.ncbi.nlm.nih.gov/sites/entrez?cmd=retrieve&db=pubmed&list_uids=21177974&dopt=DocSum	http://www.modencode.org/White.shtml	21177974(MI:0225(ChIP-chip) and ChIP-seq)	null	modENCODE-24-JAN-11	http://www.modencode.org/White.shtml	2014-10-01	pd
FBgn0261434	FBgn0266129	hkb	lov	PDI: Transcription factor-Gene	0.6388	-	lov	hkb	21177974	http://www.ncbi.nlm.nih.gov/sites/entrez?cmd=retrieve&db=pubmed&list_uids=21177974&dopt=DocSum	http://www.modencode.org/White.shtml	21177974(MI:0225(ChIP-chip) and ChIP-seq)	null	modENCODE-24-JAN-11	http://www.modencode.org/White.shtml	2014-10-01	pd
FBgn0261434	FBgn0039163	hkb	CG5515	PDI: Transcription factor-Gene	0.4203	-	CG5515	hkb	21177974	http://www.ncbi.nlm.nih.gov/sites/entrez?cmd=retrieve&db=pubmed&list_uids=21177974&dopt=DocSum	http://www.modencode.org/White.shtml	21177974(MI:0225(ChIP-chip) and ChIP-seq)	null	modENCODE-24-JAN-11	http://www.modencode.org/White.shtml	2014-10-01	pd
FBgn0261434	FBgn0029971	hkb	ND-MNLL	PDI: Transcription factor-Gene	-0.2343	-	ND-MNLL	hkb	21177974	http://www.ncbi.nlm.nih.gov/sites/entrez?cmd=retrieve&db=pubmed&list_uids=21177974&dopt=DocSum	http://www.modencode.org/White.shtml	21177974(MI:0225(ChIP-chip) and ChIP-seq)	null	modENCODE-24-JAN-11	http://www.modencode.org/White.shtml	2014-10-01	pd
FBgn0261434	FBgn0034564	hkb	CG9344	PDI: Transcription factor-Gene	0.3296	-	CG9344	hkb	21177974	http://www.ncbi.nlm.nih.gov/sites/entrez?cmd=retrieve&db=pubmed&list_uids=21177974&dopt=DocSum	http://www.modencode.org/White.shtml	21177974(MI:0225(ChIP-chip) and ChIP-seq)	null	modENCODE-24-JAN-11	http://www.modencode.org/White.shtml	2014-10-01	pd
FBgn0261434	FBgn0029976	hkb	snz	PDI: Transcription factor-Gene	-0.2351	-	snz	hkb	21177974	http://www.ncbi.nlm.nih.gov/sites/entrez?cmd=retrieve&db=pubmed&list_uids=21177974&dopt=DocSum	http://www.modencode.org/White.shtml	21177974(MI:0225(ChIP-chip) and ChIP-seq)	null	modENCODE-24-JAN-11	http://www.modencode.org/White.shtml	2014-10-01	pd
FBgn0261434	FBgn0037569	hkb	tex	PDI: Transcription factor-Gene	0.7331	-	tex	hkb	21177974	http://www.ncbi.nlm.nih.gov/sites/entrez?cmd=retrieve&db=pubmed&list_uids=21177974&dopt=DocSum	http://www.modencode.org/White.shtml	21177974(MI:0225(ChIP-chip) and ChIP-seq)	null	modENCODE-24-JAN-11	http://www.modencode.org/White.shtml	2014-10-01	pd
FBgn0261434	FBgn0260634	hkb	eIF4G2	PDI: Transcription factor-Gene	-0.2816	-	eIF4G2	hkb	21177974	http://www.ncbi.nlm.nih.gov/sites/entrez?cmd=retrieve&db=pubmed&list_uids=21177974&dopt=DocSum	http://www.modencode.org/White.shtml	21177974(MI:0225(ChIP-chip) and ChIP-seq)	null	modENCODE-24-JAN-11	http://www.modencode.org/White.shtml	2014-10-01	pd
FBgn0261434	FBgn0032586	hkb	Tpr2	PDI: Transcription factor-Gene	0.3039	-	Tpr2	hkb	21177974	http://www.ncbi.nlm.nih.gov/sites/entrez?cmd=retrieve&db=pubmed&list_uids=21177974&dopt=DocSum	http://www.modencode.org/White.shtml	21177974(MI:0225(ChIP-chip) and ChIP-seq)	null	modENCODE-24-JAN-11	http://www.modencode.org/White.shtml	2014-10-01	pd
FBgn0261434	FBgn0015371	hkb	chn	PDI: Transcription factor-Gene	0.5355	-	chn	hkb	21177974	http://www.ncbi.nlm.nih.gov/sites/entrez?cmd=retrieve&db=pubmed&list_uids=21177974&dopt=DocSum	http://www.modencode.org/White.shtml	21177974(MI:0225(ChIP-chip) and ChIP-seq)	null	modENCODE-24-JAN-11	http://www.modencode.org/White.shtml	2014-10-01	pd
FBgn0261434	FBgn0031174	hkb	CG1486	PDI: Transcription factor-Gene	0.2262	-	CG1486	hkb	21177974	http://www.ncbi.nlm.nih.gov/sites/entrez?cmd=retrieve&db=pubmed&list_uids=21177974&dopt=DocSum	http://www.modencode.org/White.shtml	21177974(MI:0225(ChIP-chip) and ChIP-seq)	null	modENCODE-24-JAN-11	http://www.modencode.org/White.shtml	2014-10-01	pd
FBgn0261434	FBgn0031450	hkb	Hrs	PDI: Transcription factor-Gene	-0.0414	-	Hrs	hkb	21177974	http://www.ncbi.nlm.nih.gov/sites/entrez?cmd=retrieve&db=pubmed&list_uids=21177974&dopt=DocSum	http://www.modencode.org/White.shtml	21177974(MI:0225(ChIP-chip) and ChIP-seq)	null	modENCODE-24-JAN-11	http://www.modencode.org/White.shtml	2014-10-01	pd
FBgn0261434	FBgn0003575	hkb	su(sable)	PDI: Transcription factor-Gene	0.5545	-	su(sable)	hkb	21177974	http://www.ncbi.nlm.nih.gov/sites/entrez?cmd=retrieve&db=pubmed&list_uids=21177974&dopt=DocSum	http://www.modencode.org/White.shtml	21177974(MI:0225(ChIP-chip) and ChIP-seq)	null	modENCODE-24-JAN-11	http://www.modencode.org/White.shtml	2014-10-01	pd
FBgn0261434	FBgn0002924	hkb	ncd	PDI: Transcription factor-Gene	0.8192	-	ncd	hkb	21177974	http://www.ncbi.nlm.nih.gov/sites/entrez?cmd=retrieve&db=pubmed&list_uids=21177974&dopt=DocSum	http://www.modencode.org/White.shtml	21177974(MI:0225(ChIP-chip) and ChIP-seq)	null	modENCODE-24-JAN-11	http://www.modencode.org/White.shtml	2014-10-01	pd
FBgn0261434	FBgn0037579	hkb	COX7AL	PDI: Transcription factor-Gene	-0.1931	-	COX7AL	hkb	21177974	http://www.ncbi.nlm.nih.gov/sites/entrez?cmd=retrieve&db=pubmed&list_uids=21177974&dopt=DocSum	http://www.modencode.org/White.shtml	21177974(MI:0225(ChIP-chip) and ChIP-seq)	null	modENCODE-24-JAN-11	http://www.modencode.org/White.shtml	2014-10-01	pd
FBgn0261434	FBgn0027291	hkb	l(1)G0156	PDI: Transcription factor-Gene	-0.1962	-	l(1)G0156	hkb	21177974	http://www.ncbi.nlm.nih.gov/sites/entrez?cmd=retrieve&db=pubmed&list_uids=21177974&dopt=DocSum	http://www.modencode.org/White.shtml	21177974(MI:0225(ChIP-chip) and ChIP-seq)	null	modENCODE-24-JAN-11	http://www.modencode.org/White.shtml	2014-10-01	pd
FBgn0261434	FBgn0037578	hkb	CG9601	PDI: Transcription factor-Gene	0.6492	-	CG9601	hkb	21177974	http://www.ncbi.nlm.nih.gov/sites/entrez?cmd=retrieve&db=pubmed&list_uids=21177974&dopt=DocSum	http://www.modencode.org/White.shtml	21177974(MI:0225(ChIP-chip) and ChIP-seq)	null	modENCODE-24-JAN-11	http://www.modencode.org/White.shtml	2014-10-01	pd
FBgn0261434	FBgn0028408	hkb	Drep2	PDI: Transcription factor-Gene	0.6606	-	Drep2	hkb	21177974	http://www.ncbi.nlm.nih.gov/sites/entrez?cmd=retrieve&db=pubmed&list_uids=21177974&dopt=DocSum	http://www.modencode.org/White.shtml	21177974(MI:0225(ChIP-chip) and ChIP-seq)	null	modENCODE-24-JAN-11	http://www.modencode.org/White.shtml	2014-10-01	pd
FBgn0261434	FBgn0031682	hkb	CG5828	PDI: Transcription factor-Gene	-0.0912	-	CG5828	hkb	21177974	http://www.ncbi.nlm.nih.gov/sites/entrez?cmd=retrieve&db=pubmed&list_uids=21177974&dopt=DocSum	http://www.modencode.org/White.shtml	21177974(MI:0225(ChIP-chip) and ChIP-seq)	null	modENCODE-24-JAN-11	http://www.modencode.org/White.shtml	2014-10-01	pd
FBgn0261434	FBgn0031479	hkb	Prx6005	PDI: Transcription factor-Gene	0.4062	-	Prx6005	hkb	21177974	http://www.ncbi.nlm.nih.gov/sites/entrez?cmd=retrieve&db=pubmed&list_uids=21177974&dopt=DocSum	http://www.modencode.org/White.shtml	21177974(MI:0225(ChIP-chip) and ChIP-seq)	null	modENCODE-24-JAN-11	http://www.modencode.org/White.shtml	2014-10-01	pd
FBgn0261434	FBgn0004606	hkb	zfh1	PDI: Transcription factor-Gene	0.36	-	zfh1	hkb	21177974	http://www.ncbi.nlm.nih.gov/sites/entrez?cmd=retrieve&db=pubmed&list_uids=21177974&dopt=DocSum	http://www.modencode.org/White.shtml	21177974(MI:0225(ChIP-chip) and ChIP-seq)	null	modENCODE-24-JAN-11	http://www.modencode.org/White.shtml	2014-10-01	pd
FBgn0261434	FBgn0031681	hkb	Pgant5	PDI: Transcription factor-Gene	-0.0966	-	pgant5	hkb	21177974	http://www.ncbi.nlm.nih.gov/sites/entrez?cmd=retrieve&db=pubmed&list_uids=21177974&dopt=DocSum	http://www.modencode.org/White.shtml	21177974(MI:0225(ChIP-chip) and ChIP-seq)	null	modENCODE-24-JAN-11	http://www.modencode.org/White.shtml	2014-10-01	pd
FBgn0261434	FBgn0261549	hkb	rdgA	PDI: Transcription factor-Gene	-0.2349	-	rdgA	hkb	21177974	http://www.ncbi.nlm.nih.gov/sites/entrez?cmd=retrieve&db=pubmed&list_uids=21177974&dopt=DocSum	http://www.modencode.org/White.shtml	21177974(MI:0225(ChIP-chip) and ChIP-seq)	null	modENCODE-24-JAN-11	http://www.modencode.org/White.shtml	2014-10-01	pd
FBgn0261434	FBgn0004811	hkb	fs(2)ltoPP43	PDI: Transcription factor-Gene	0.8834	-	fs(2)ltoPP43	hkb	21177974	http://www.ncbi.nlm.nih.gov/sites/entrez?cmd=retrieve&db=pubmed&list_uids=21177974&dopt=DocSum	http://www.modencode.org/White.shtml	21177974(MI:0225(ChIP-chip) and ChIP-seq)	null	modENCODE-24-JAN-11	http://www.modencode.org/White.shtml	2014-10-01	pd
FBgn0261434	FBgn0037770	hkb	Art4	PDI: Transcription factor-Gene	0.4512	-	Art4	hkb	21177974	http://www.ncbi.nlm.nih.gov/sites/entrez?cmd=retrieve&db=pubmed&list_uids=21177974&dopt=DocSum	http://www.modencode.org/White.shtml	21177974(MI:0225(ChIP-chip) and ChIP-seq)	null	modENCODE-24-JAN-11	http://www.modencode.org/White.shtml	2014-10-01	pd
FBgn0261434	FBgn0038071	hkb	Dtg	PDI: Transcription factor-Gene	0.7288	-	Dtg	hkb	21177974	http://www.ncbi.nlm.nih.gov/sites/entrez?cmd=retrieve&db=pubmed&list_uids=21177974&dopt=DocSum	http://www.modencode.org/White.shtml	21177974(MI:0225(ChIP-chip) and ChIP-seq)	null	modENCODE-24-JAN-11	http://www.modencode.org/White.shtml	2014-10-01	pd
FBgn0261434	FBgn0262249	hkb	mir-958	PDI: Transcription factor-Gene	-	-	mir-958	hkb	21177974	http://www.ncbi.nlm.nih.gov/sites/entrez?cmd=retrieve&db=pubmed&list_uids=21177974&dopt=DocSum	http://www.modencode.org/White.shtml	21177974(MI:0225(ChIP-chip) and ChIP-seq)	null	modENCODE-24-JAN-11	http://www.modencode.org/White.shtml	2014-10-01	pd
FBgn0261434	FBgn0003567	hkb	su(Hw)	PDI: Transcription factor-Gene	0.5485	-	su(Hw)	hkb	21177974	http://www.ncbi.nlm.nih.gov/sites/entrez?cmd=retrieve&db=pubmed&list_uids=21177974&dopt=DocSum	http://www.modencode.org/White.shtml	21177974(MI:0225(ChIP-chip) and ChIP-seq)	null	modENCODE-24-JAN-11	http://www.modencode.org/White.shtml	2014-10-01	pd
FBgn0261434	FBgn0261550	hkb	CG42668	PDI: Transcription factor-Gene	-0.185	-	CG42668	hkb	21177974	http://www.ncbi.nlm.nih.gov/sites/entrez?cmd=retrieve&db=pubmed&list_uids=21177974&dopt=DocSum	http://www.modencode.org/White.shtml	21177974(MI:0225(ChIP-chip) and ChIP-seq)	null	modENCODE-24-JAN-11	http://www.modencode.org/White.shtml	2014-10-01	pd
FBgn0261434	FBgn0000157	hkb	Dll	PDI: Transcription factor-Gene	0.0621	-	Dll	hkb	21177974	http://www.ncbi.nlm.nih.gov/sites/entrez?cmd=retrieve&db=pubmed&list_uids=21177974&dopt=DocSum	http://www.modencode.org/White.shtml	21177974(MI:0225(ChIP-chip) and ChIP-seq)	null	modENCODE-24-JAN-11	http://www.modencode.org/White.shtml	2014-10-01	pd
FBgn0261434	FBgn0261553	hkb	CG42671	PDI: Transcription factor-Gene	-0.4016	-	CG42671	hkb	21177974	http://www.ncbi.nlm.nih.gov/sites/entrez?cmd=retrieve&db=pubmed&list_uids=21177974&dopt=DocSum	http://www.modencode.org/White.shtml	21177974(MI:0225(ChIP-chip) and ChIP-seq)	null	modENCODE-24-JAN-11	http://www.modencode.org/White.shtml	2014-10-01	pd
FBgn0261434	FBgn0000152	hkb	Axs	PDI: Transcription factor-Gene	-0.1004	-	Axs	hkb	21177974	http://www.ncbi.nlm.nih.gov/sites/entrez?cmd=retrieve&db=pubmed&list_uids=21177974&dopt=DocSum	http://www.modencode.org/White.shtml	21177974(MI:0225(ChIP-chip) and ChIP-seq)	null	modENCODE-24-JAN-11	http://www.modencode.org/White.shtml	2014-10-01	pd
FBgn0261434	FBgn0013263	hkb	Trl	PDI: Transcription factor-Gene	0.7249	-	Trl	hkb	21177974	http://www.ncbi.nlm.nih.gov/sites/entrez?cmd=retrieve&db=pubmed&list_uids=21177974&dopt=DocSum	http://www.modencode.org/White.shtml	21177974(MI:0225(ChIP-chip) and ChIP-seq)	null	modENCODE-24-JAN-11	http://www.modencode.org/White.shtml	2014-10-01	pd
FBgn0261434	FBgn0037779	hkb	CG12811	PDI: Transcription factor-Gene	-0.4413	-	CG12811	hkb	21177974	http://www.ncbi.nlm.nih.gov/sites/entrez?cmd=retrieve&db=pubmed&list_uids=21177974&dopt=DocSum	http://www.modencode.org/White.shtml	21177974(MI:0225(ChIP-chip) and ChIP-seq)	null	modENCODE-24-JAN-11	http://www.modencode.org/White.shtml	2014-10-01	pd
FBgn0261434	FBgn0039846	hkb	PNPase	PDI: Transcription factor-Gene	0.188	-	CG11337	hkb	21177974	http://www.ncbi.nlm.nih.gov/sites/entrez?cmd=retrieve&db=pubmed&list_uids=21177974&dopt=DocSum	http://www.modencode.org/White.shtml	21177974(MI:0225(ChIP-chip) and ChIP-seq)	null	modENCODE-24-JAN-11	http://www.modencode.org/White.shtml	2014-10-01	pd
FBgn0261434	FBgn0039849	hkb	CG11334	PDI: Transcription factor-Gene	-0.1608	-	CG11334	hkb	21177974	http://www.ncbi.nlm.nih.gov/sites/entrez?cmd=retrieve&db=pubmed&list_uids=21177974&dopt=DocSum	http://www.modencode.org/White.shtml	21177974(MI:0225(ChIP-chip) and ChIP-seq)	null	modENCODE-24-JAN-11	http://www.modencode.org/White.shtml	2014-10-01	pd
FBgn0261434	FBgn0029915	hkb	CG14434	PDI: Transcription factor-Gene	0.5007	-	CG14434	hkb	21177974	http://www.ncbi.nlm.nih.gov/sites/entrez?cmd=retrieve&db=pubmed&list_uids=21177974&dopt=DocSum	http://www.modencode.org/White.shtml	21177974(MI:0225(ChIP-chip) and ChIP-seq)	null	modENCODE-24-JAN-11	http://www.modencode.org/White.shtml	2014-10-01	pd
FBgn0261434	FBgn0015591	hkb	AstA	PDI: Transcription factor-Gene	-0.0134	-	AstA	hkb	21177974	http://www.ncbi.nlm.nih.gov/sites/entrez?cmd=retrieve&db=pubmed&list_uids=21177974&dopt=DocSum	http://www.modencode.org/White.shtml	21177974(MI:0225(ChIP-chip) and ChIP-seq)	null	modENCODE-24-JAN-11	http://www.modencode.org/White.shtml	2014-10-01	pd
FBgn0261434	FBgn0032513	hkb	CG6565	PDI: Transcription factor-Gene	-0.2035	-	CG6565	hkb	21177974	http://www.ncbi.nlm.nih.gov/sites/entrez?cmd=retrieve&db=pubmed&list_uids=21177974&dopt=DocSum	http://www.modencode.org/White.shtml	21177974(MI:0225(ChIP-chip) and ChIP-seq)	null	modENCODE-24-JAN-11	http://www.modencode.org/White.shtml	2014-10-01	pd
FBgn0261434	FBgn0010194	hkb	Wnt5	PDI: Transcription factor-Gene	0.6884	-	Wnt5	hkb	21177974	http://www.ncbi.nlm.nih.gov/sites/entrez?cmd=retrieve&db=pubmed&list_uids=21177974&dopt=DocSum	http://www.modencode.org/White.shtml	21177974(MI:0225(ChIP-chip) and ChIP-seq)	null	modENCODE-24-JAN-11	http://www.modencode.org/White.shtml	2014-10-01	pd
FBgn0261434	FBgn0031882	hkb	Rab30	PDI: Transcription factor-Gene	0.2199	-	Rab30	hkb	21177974	http://www.ncbi.nlm.nih.gov/sites/entrez?cmd=retrieve&db=pubmed&list_uids=21177974&dopt=DocSum	http://www.modencode.org/White.shtml	21177974(MI:0225(ChIP-chip) and ChIP-seq)	null	modENCODE-24-JAN-11	http://www.modencode.org/White.shtml	2014-10-01	pd
FBgn0261434	FBgn0028554	hkb	x16	PDI: Transcription factor-Gene	0.8446	-	x16	hkb	21177974	http://www.ncbi.nlm.nih.gov/sites/entrez?cmd=retrieve&db=pubmed&list_uids=21177974&dopt=DocSum	http://www.modencode.org/White.shtml	21177974(MI:0225(ChIP-chip) and ChIP-seq)	null	modENCODE-24-JAN-11	http://www.modencode.org/White.shtml	2014-10-01	pd
FBgn0261434	FBgn0031883	hkb	Caper	PDI: Transcription factor-Gene	0.6406	-	Caper	hkb	21177974	http://www.ncbi.nlm.nih.gov/sites/entrez?cmd=retrieve&db=pubmed&list_uids=21177974&dopt=DocSum	http://www.modencode.org/White.shtml	21177974(MI:0225(ChIP-chip) and ChIP-seq)	null	modENCODE-24-JAN-11	http://www.modencode.org/White.shtml	2014-10-01	pd
FBgn0261434	FBgn0038065	hkb	Snx3	PDI: Transcription factor-Gene	0.3191	-	Snx3	hkb	21177974	http://www.ncbi.nlm.nih.gov/sites/entrez?cmd=retrieve&db=pubmed&list_uids=21177974&dopt=DocSum	http://www.modencode.org/White.shtml	21177974(MI:0225(ChIP-chip) and ChIP-seq)	null	modENCODE-24-JAN-11	http://www.modencode.org/White.shtml	2014-10-01	pd
FBgn0261434	FBgn0031673	hkb	CG31650	PDI: Transcription factor-Gene	0.8046	-	CG31650	hkb	21177974	http://www.ncbi.nlm.nih.gov/sites/entrez?cmd=retrieve&db=pubmed&list_uids=21177974&dopt=DocSum	http://www.modencode.org/White.shtml	21177974(MI:0225(ChIP-chip) and ChIP-seq)	null	modENCODE-24-JAN-11	http://www.modencode.org/White.shtml	2014-10-01	pd
FBgn0261434	FBgn0051087	hkb	CG31087	PDI: Transcription factor-Gene	-0.2761	-	CG31087	hkb	21177974	http://www.ncbi.nlm.nih.gov/sites/entrez?cmd=retrieve&db=pubmed&list_uids=21177974&dopt=DocSum	http://www.modencode.org/White.shtml	21177974(MI:0225(ChIP-chip) and ChIP-seq)	null	modENCODE-24-JAN-11	http://www.modencode.org/White.shtml	2014-10-01	pd
FBgn0261434	FBgn0000147	hkb	aurA	PDI: Transcription factor-Gene	0.4593	-	aurA	hkb	21177974	http://www.ncbi.nlm.nih.gov/sites/entrez?cmd=retrieve&db=pubmed&list_uids=21177974&dopt=DocSum	http://www.modencode.org/White.shtml	21177974(MI:0225(ChIP-chip) and ChIP-seq)	null	modENCODE-24-JAN-11	http://www.modencode.org/White.shtml	2014-10-01	pd
FBgn0261434	FBgn0037780	hkb	ohgt	PDI: Transcription factor-Gene	0.2526	-	CG3925	hkb	21177974	http://www.ncbi.nlm.nih.gov/sites/entrez?cmd=retrieve&db=pubmed&list_uids=21177974&dopt=DocSum	http://www.modencode.org/White.shtml	21177974(MI:0225(ChIP-chip) and ChIP-seq)	null	modENCODE-24-JAN-11	http://www.modencode.org/White.shtml	2014-10-01	pd
FBgn0261434	FBgn0002905	hkb	mus308	PDI: Transcription factor-Gene	0.5929	-	mus308	hkb	21177974	http://www.ncbi.nlm.nih.gov/sites/entrez?cmd=retrieve&db=pubmed&list_uids=21177974&dopt=DocSum	http://www.modencode.org/White.shtml	21177974(MI:0225(ChIP-chip) and ChIP-seq)	null	modENCODE-24-JAN-11	http://www.modencode.org/White.shtml	2014-10-01	pd
FBgn0261434	FBgn0031194	hkb	CG17598	PDI: Transcription factor-Gene	0.4513	-	CG17598	hkb	21177974	http://www.ncbi.nlm.nih.gov/sites/entrez?cmd=retrieve&db=pubmed&list_uids=21177974&dopt=DocSum	http://www.modencode.org/White.shtml	21177974(MI:0225(ChIP-chip) and ChIP-seq)	null	modENCODE-24-JAN-11	http://www.modencode.org/White.shtml	2014-10-01	pd
FBgn0261434	FBgn0003557	hkb	Su(dx)	PDI: Transcription factor-Gene	0.299	-	Su(dx)	hkb	21177974	http://www.ncbi.nlm.nih.gov/sites/entrez?cmd=retrieve&db=pubmed&list_uids=21177974&dopt=DocSum	http://www.modencode.org/White.shtml	21177974(MI:0225(ChIP-chip) and ChIP-seq)	null	modENCODE-24-JAN-11	http://www.modencode.org/White.shtml	2014-10-01	pd
FBgn0261434	FBgn0031195	hkb	CG17600	PDI: Transcription factor-Gene	0.1153	-	CG17600	hkb	21177974	http://www.ncbi.nlm.nih.gov/sites/entrez?cmd=retrieve&db=pubmed&list_uids=21177974&dopt=DocSum	http://www.modencode.org/White.shtml	21177974(MI:0225(ChIP-chip) and ChIP-seq)	null	modENCODE-24-JAN-11	http://www.modencode.org/White.shtml	2014-10-01	pd
FBgn0261434	FBgn0038476	hkb	kuk	PDI: Transcription factor-Gene	0.7893	-	kuk	hkb	21177974	http://www.ncbi.nlm.nih.gov/sites/entrez?cmd=retrieve&db=pubmed&list_uids=21177974&dopt=DocSum	http://www.modencode.org/White.shtml	21177974(MI:0225(ChIP-chip) and ChIP-seq)	null	modENCODE-24-JAN-11	http://www.modencode.org/White.shtml	2014-10-01	pd
FBgn0261434	FBgn0015393	hkb	hoip	PDI: Transcription factor-Gene	0.0982	-	hoip	hkb	21177974	http://www.ncbi.nlm.nih.gov/sites/entrez?cmd=retrieve&db=pubmed&list_uids=21177974&dopt=DocSum	http://www.modencode.org/White.shtml	21177974(MI:0225(ChIP-chip) and ChIP-seq)	null	modENCODE-24-JAN-11	http://www.modencode.org/White.shtml	2014-10-01	pd
FBgn0261434	FBgn0039831	hkb	CG12054	PDI: Transcription factor-Gene	0.5019	-	CG12054	hkb	21177974	http://www.ncbi.nlm.nih.gov/sites/entrez?cmd=retrieve&db=pubmed&list_uids=21177974&dopt=DocSum	http://www.modencode.org/White.shtml	21177974(MI:0225(ChIP-chip) and ChIP-seq)	null	modENCODE-24-JAN-11	http://www.modencode.org/White.shtml	2014-10-01	pd
FBgn0261434	FBgn0000659	hkb	fkh	PDI: Transcription factor-Gene	0.343	-	fkh	hkb	21177974	http://www.ncbi.nlm.nih.gov/sites/entrez?cmd=retrieve&db=pubmed&list_uids=21177974&dopt=DocSum	http://www.modencode.org/White.shtml	21177974(MI:0225(ChIP-chip) and ChIP-seq)	null	modENCODE-24-JAN-11	http://www.modencode.org/White.shtml	2014-10-01	pd
FBgn0261434	FBgn0259785	hkb	pzg	PDI: Transcription factor-Gene	0.843	-	pzg	hkb	21177974	http://www.ncbi.nlm.nih.gov/sites/entrez?cmd=retrieve&db=pubmed&list_uids=21177974&dopt=DocSum	http://www.modencode.org/White.shtml	21177974(MI:0225(ChIP-chip) and ChIP-seq)	null	modENCODE-24-JAN-11	http://www.modencode.org/White.shtml	2014-10-01	pd
FBgn0261434	FBgn0031879	hkb	uif	PDI: Transcription factor-Gene	0.0876	-	uif	hkb	21177974	http://www.ncbi.nlm.nih.gov/sites/entrez?cmd=retrieve&db=pubmed&list_uids=21177974&dopt=DocSum	http://www.modencode.org/White.shtml	21177974(MI:0225(ChIP-chip) and ChIP-seq)	null	modENCODE-24-JAN-11	http://www.modencode.org/White.shtml	2014-10-01	pd
FBgn0261434	FBgn0000274	hkb	Pka-C2	PDI: Transcription factor-Gene	-0.1869	-	Pka-C2	hkb	21177974	http://www.ncbi.nlm.nih.gov/sites/entrez?cmd=retrieve&db=pubmed&list_uids=21177974&dopt=DocSum	http://www.modencode.org/White.shtml	21177974(MI:0225(ChIP-chip) and ChIP-seq)	null	modENCODE-24-JAN-11	http://www.modencode.org/White.shtml	2014-10-01	pd
FBgn0261434	FBgn0031895	hkb	CG4497	PDI: Transcription factor-Gene	0.4153	-	CG4497	hkb	21177974	http://www.ncbi.nlm.nih.gov/sites/entrez?cmd=retrieve&db=pubmed&list_uids=21177974&dopt=DocSum	http://www.modencode.org/White.shtml	21177974(MI:0225(ChIP-chip) and ChIP-seq)	null	modENCODE-24-JAN-11	http://www.modencode.org/White.shtml	2014-10-01	pd
FBgn0261434	FBgn0029943	hkb	Atg5	PDI: Transcription factor-Gene	0.1692	-	Atg5	hkb	21177974	http://www.ncbi.nlm.nih.gov/sites/entrez?cmd=retrieve&db=pubmed&list_uids=21177974&dopt=DocSum	http://www.modencode.org/White.shtml	21177974(MI:0225(ChIP-chip) and ChIP-seq)	null	modENCODE-24-JAN-11	http://www.modencode.org/White.shtml	2014-10-01	pd
FBgn0261434	FBgn0029944	hkb	Dok	PDI: Transcription factor-Gene	0.3218	-	Dok	hkb	21177974	http://www.ncbi.nlm.nih.gov/sites/entrez?cmd=retrieve&db=pubmed&list_uids=21177974&dopt=DocSum	http://www.modencode.org/White.shtml	21177974(MI:0225(ChIP-chip) and ChIP-seq)	null	modENCODE-24-JAN-11	http://www.modencode.org/White.shtml	2014-10-01	pd
FBgn0261434	FBgn0262617	hkb	CG43143	PDI: Transcription factor-Gene	-0.2217	-	CG43143	hkb	21177974	http://www.ncbi.nlm.nih.gov/sites/entrez?cmd=retrieve&db=pubmed&list_uids=21177974&dopt=DocSum	http://www.modencode.org/White.shtml	21177974(MI:0225(ChIP-chip) and ChIP-seq)	null	modENCODE-24-JAN-11	http://www.modencode.org/White.shtml	2014-10-01	pd
FBgn0261434	FBgn0003048	hkb	pcx	PDI: Transcription factor-Gene	0.4499	-	pcx	hkb	21177974	http://www.ncbi.nlm.nih.gov/sites/entrez?cmd=retrieve&db=pubmed&list_uids=21177974&dopt=DocSum	http://www.modencode.org/White.shtml	21177974(MI:0225(ChIP-chip) and ChIP-seq)	null	modENCODE-24-JAN-11	http://www.modencode.org/White.shtml	2014-10-01	pd
FBgn0261434	FBgn0003041	hkb	pbl	PDI: Transcription factor-Gene	0.5034	-	pbl	hkb	21177974	http://www.ncbi.nlm.nih.gov/sites/entrez?cmd=retrieve&db=pubmed&list_uids=21177974&dopt=DocSum	http://www.modencode.org/White.shtml	21177974(MI:0225(ChIP-chip) and ChIP-seq)	null	modENCODE-24-JAN-11	http://www.modencode.org/White.shtml	2014-10-01	pd
FBgn0261434	FBgn0039860	hkb	CG1792	PDI: Transcription factor-Gene	0.265	-	CG1792	hkb	21177974	http://www.ncbi.nlm.nih.gov/sites/entrez?cmd=retrieve&db=pubmed&list_uids=21177974&dopt=DocSum	http://www.modencode.org/White.shtml	21177974(MI:0225(ChIP-chip) and ChIP-seq)	null	modENCODE-24-JAN-11	http://www.modencode.org/White.shtml	2014-10-01	pd
FBgn0261434	FBgn0037792	hkb	TAF1B	PDI: Transcription factor-Gene	0.6591	-	TAF1B	hkb	21177974	http://www.ncbi.nlm.nih.gov/sites/entrez?cmd=retrieve&db=pubmed&list_uids=21177974&dopt=DocSum	http://www.modencode.org/White.shtml	21177974(MI:0225(ChIP-chip) and ChIP-seq)	null	modENCODE-24-JAN-11	http://www.modencode.org/White.shtml	2014-10-01	pd
FBgn0261434	FBgn0022238	hkb	lolal	PDI: Transcription factor-Gene	0.743	-	lolal	hkb	21177974	http://www.ncbi.nlm.nih.gov/sites/entrez?cmd=retrieve&db=pubmed&list_uids=21177974&dopt=DocSum	http://www.modencode.org/White.shtml	21177974(MI:0225(ChIP-chip) and ChIP-seq)	null	modENCODE-24-JAN-11	http://www.modencode.org/White.shtml	2014-10-01	pd
FBgn0261434	FBgn0000286	hkb	Cf2	PDI: Transcription factor-Gene	-0.513	-	Cf2	hkb	21177974	http://www.ncbi.nlm.nih.gov/sites/entrez?cmd=retrieve&db=pubmed&list_uids=21177974&dopt=DocSum	http://www.modencode.org/White.shtml	21177974(MI:0225(ChIP-chip) and ChIP-seq)	null	modENCODE-24-JAN-11	http://www.modencode.org/White.shtml	2014-10-01	pd
FBgn0261434	FBgn0041775	hkb	tral	PDI: Transcription factor-Gene	0.1808	-	tral	hkb	21177974	http://www.ncbi.nlm.nih.gov/sites/entrez?cmd=retrieve&db=pubmed&list_uids=21177974&dopt=DocSum	http://www.modencode.org/White.shtml	21177974(MI:0225(ChIP-chip) and ChIP-seq)	null	modENCODE-24-JAN-11	http://www.modencode.org/White.shtml	2014-10-01	pd
FBgn0261434	FBgn0039868	hkb	CG11563	PDI: Transcription factor-Gene	0.5303	-	CG11563	hkb	21177974	http://www.ncbi.nlm.nih.gov/sites/entrez?cmd=retrieve&db=pubmed&list_uids=21177974&dopt=DocSum	http://www.modencode.org/White.shtml	21177974(MI:0225(ChIP-chip) and ChIP-seq)	null	modENCODE-24-JAN-11	http://www.modencode.org/White.shtml	2014-10-01	pd
FBgn0261434	FBgn0266599	hkb	Hsc70-4	PDI: Transcription factor-Gene	0.104	-	Hsc70-4	hkb	21177974	http://www.ncbi.nlm.nih.gov/sites/entrez?cmd=retrieve&db=pubmed&list_uids=21177974&dopt=DocSum	http://www.modencode.org/White.shtml	21177974(MI:0225(ChIP-chip) and ChIP-seq)	null	modENCODE-24-JAN-11	http://www.modencode.org/White.shtml	2014-10-01	pd
FBgn0261434	FBgn0041585	hkb	olf186-F	PDI: Transcription factor-Gene	0.0959	-	olf186-F	hkb	21177974	http://www.ncbi.nlm.nih.gov/sites/entrez?cmd=retrieve&db=pubmed&list_uids=21177974&dopt=DocSum	http://www.modencode.org/White.shtml	21177974(MI:0225(ChIP-chip) and ChIP-seq)	null	modENCODE-24-JAN-11	http://www.modencode.org/White.shtml	2014-10-01	pd
FBgn0261434	FBgn0013718	hkb	nuf	PDI: Transcription factor-Gene	0.1844	-	nuf	hkb	21177974	http://www.ncbi.nlm.nih.gov/sites/entrez?cmd=retrieve&db=pubmed&list_uids=21177974&dopt=DocSum	http://www.modencode.org/White.shtml	21177974(MI:0225(ChIP-chip) and ChIP-seq)	null	modENCODE-24-JAN-11	http://www.modencode.org/White.shtml	2014-10-01	pd
FBgn0261434	FBgn0039867	hkb	CstF50	PDI: Transcription factor-Gene	0.8419	-	CstF-50	hkb	21177974	http://www.ncbi.nlm.nih.gov/sites/entrez?cmd=retrieve&db=pubmed&list_uids=21177974&dopt=DocSum	http://www.modencode.org/White.shtml	21177974(MI:0225(ChIP-chip) and ChIP-seq)	null	modENCODE-24-JAN-11	http://www.modencode.org/White.shtml	2014-10-01	pd
FBgn0261434	FBgn0029931	hkb	CG14427	PDI: Transcription factor-Gene	0.654	-	CG14427	hkb	21177974	http://www.ncbi.nlm.nih.gov/sites/entrez?cmd=retrieve&db=pubmed&list_uids=21177974&dopt=DocSum	http://www.modencode.org/White.shtml	21177974(MI:0225(ChIP-chip) and ChIP-seq)	null	modENCODE-24-JAN-11	http://www.modencode.org/White.shtml	2014-10-01	pd
FBgn0261434	FBgn0031698	hkb	Ncoa6	PDI: Transcription factor-Gene	0.5876	-	Ncoa6	hkb	21177974	http://www.ncbi.nlm.nih.gov/sites/entrez?cmd=retrieve&db=pubmed&list_uids=21177974&dopt=DocSum	http://www.modencode.org/White.shtml	21177974(MI:0225(ChIP-chip) and ChIP-seq)	null	modENCODE-24-JAN-11	http://www.modencode.org/White.shtml	2014-10-01	pd
FBgn0261434	FBgn0029006	hkb	Smurf	PDI: Transcription factor-Gene	0.2593	-	Smurf	hkb	21177974	http://www.ncbi.nlm.nih.gov/sites/entrez?cmd=retrieve&db=pubmed&list_uids=21177974&dopt=DocSum	http://www.modencode.org/White.shtml	21177974(MI:0225(ChIP-chip) and ChIP-seq)	null	modENCODE-24-JAN-11	http://www.modencode.org/White.shtml	2014-10-01	pd
FBgn0261434	FBgn0022029	hkb	l(2)k01209	PDI: Transcription factor-Gene	0.3688	-	l(2)k01209	hkb	21177974	http://www.ncbi.nlm.nih.gov/sites/entrez?cmd=retrieve&db=pubmed&list_uids=21177974&dopt=DocSum	http://www.modencode.org/White.shtml	21177974(MI:0225(ChIP-chip) and ChIP-seq)	null	modENCODE-24-JAN-11	http://www.modencode.org/White.shtml	2014-10-01	pd
FBgn0261434	FBgn0003334	hkb	Scm	PDI: Transcription factor-Gene	0.3148	-	Scm	hkb	21177974	http://www.ncbi.nlm.nih.gov/sites/entrez?cmd=retrieve&db=pubmed&list_uids=21177974&dopt=DocSum	http://www.modencode.org/White.shtml	21177974(MI:0225(ChIP-chip) and ChIP-seq)	null	modENCODE-24-JAN-11	http://www.modencode.org/White.shtml	2014-10-01	pd
FBgn0261434	FBgn0031694	hkb	Cyp4ac2	PDI: Transcription factor-Gene	-0.1487	-	Cyp4ac2	hkb	21177974	http://www.ncbi.nlm.nih.gov/sites/entrez?cmd=retrieve&db=pubmed&list_uids=21177974&dopt=DocSum	http://www.modencode.org/White.shtml	21177974(MI:0225(ChIP-chip) and ChIP-seq)	null	modENCODE-24-JAN-11	http://www.modencode.org/White.shtml	2014-10-01	pd
FBgn0261434	FBgn0039850	hkb	CG11333	PDI: Transcription factor-Gene	-0.2111	-	CG11333	hkb	21177974	http://www.ncbi.nlm.nih.gov/sites/entrez?cmd=retrieve&db=pubmed&list_uids=21177974&dopt=DocSum	http://www.modencode.org/White.shtml	21177974(MI:0225(ChIP-chip) and ChIP-seq)	null	modENCODE-24-JAN-11	http://www.modencode.org/White.shtml	2014-10-01	pd
FBgn0261434	FBgn0086687	hkb	Desat1	PDI: Transcription factor-Gene	-0.3227	-	Desat1	hkb	21177974	http://www.ncbi.nlm.nih.gov/sites/entrez?cmd=retrieve&db=pubmed&list_uids=21177974&dopt=DocSum	http://www.modencode.org/White.shtml	21177974(MI:0225(ChIP-chip) and ChIP-seq)	null	modENCODE-24-JAN-11	http://www.modencode.org/White.shtml	2014-10-01	pd
FBgn0261434	FBgn0086686	hkb	l(3)L1231	PDI: Transcription factor-Gene	0.538	-	l(3)L1231	hkb	21177974	http://www.ncbi.nlm.nih.gov/sites/entrez?cmd=retrieve&db=pubmed&list_uids=21177974&dopt=DocSum	http://www.modencode.org/White.shtml	21177974(MI:0225(ChIP-chip) and ChIP-seq)	null	modENCODE-24-JAN-11	http://www.modencode.org/White.shtml	2014-10-01	pd
FBgn0261434	FBgn0031495	hkb	GABPI	PDI: Transcription factor-Gene	0.4265	-	GABPI	hkb	21177974	http://www.ncbi.nlm.nih.gov/sites/entrez?cmd=retrieve&db=pubmed&list_uids=21177974&dopt=DocSum	http://www.modencode.org/White.shtml	21177974(MI:0225(ChIP-chip) and ChIP-seq)	null	modENCODE-24-JAN-11	http://www.modencode.org/White.shtml	2014-10-01	pd
FBgn0261434	FBgn0039859	hkb	CG11539	PDI: Transcription factor-Gene	-0.1173	-	CG11539	hkb	21177974	http://www.ncbi.nlm.nih.gov/sites/entrez?cmd=retrieve&db=pubmed&list_uids=21177974&dopt=DocSum	http://www.modencode.org/White.shtml	21177974(MI:0225(ChIP-chip) and ChIP-seq)	null	modENCODE-24-JAN-11	http://www.modencode.org/White.shtml	2014-10-01	pd
FBgn0261434	FBgn0013272	hkb	Gp150	PDI: Transcription factor-Gene	0.069	-	Gp150	hkb	21177974	http://www.ncbi.nlm.nih.gov/sites/entrez?cmd=retrieve&db=pubmed&list_uids=21177974&dopt=DocSum	http://www.modencode.org/White.shtml	21177974(MI:0225(ChIP-chip) and ChIP-seq)	null	modENCODE-24-JAN-11	http://www.modencode.org/White.shtml	2014-10-01	pd
FBgn0261434	FBgn0029929	hkb	CG4593	PDI: Transcription factor-Gene	-0.1166	-	CG4593	hkb	21177974	http://www.ncbi.nlm.nih.gov/sites/entrez?cmd=retrieve&db=pubmed&list_uids=21177974&dopt=DocSum	http://www.modencode.org/White.shtml	21177974(MI:0225(ChIP-chip) and ChIP-seq)	null	modENCODE-24-JAN-11	http://www.modencode.org/White.shtml	2014-10-01	pd
FBgn0261434	FBgn0029928	hkb	CG3032	PDI: Transcription factor-Gene	0.1397	-	CG3032	hkb	21177974	http://www.ncbi.nlm.nih.gov/sites/entrez?cmd=retrieve&db=pubmed&list_uids=21177974&dopt=DocSum	http://www.modencode.org/White.shtml	21177974(MI:0225(ChIP-chip) and ChIP-seq)	null	modENCODE-24-JAN-11	http://www.modencode.org/White.shtml	2014-10-01	pd
FBgn0261434	FBgn0037992	hkb	CG4702	PDI: Transcription factor-Gene	-0.0973	-	CG4702	hkb	21177974	http://www.ncbi.nlm.nih.gov/sites/entrez?cmd=retrieve&db=pubmed&list_uids=21177974&dopt=DocSum	http://www.modencode.org/White.shtml	21177974(MI:0225(ChIP-chip) and ChIP-seq)	null	modENCODE-24-JAN-11	http://www.modencode.org/White.shtml	2014-10-01	pd
FBgn0261434	FBgn0037737	hkb	Pnn	PDI: Transcription factor-Gene	0.5537	-	Pnn	hkb	21177974	http://www.ncbi.nlm.nih.gov/sites/entrez?cmd=retrieve&db=pubmed&list_uids=21177974&dopt=DocSum	http://www.modencode.org/White.shtml	21177974(MI:0225(ChIP-chip) and ChIP-seq)	null	modENCODE-24-JAN-11	http://www.modencode.org/White.shtml	2014-10-01	pd
FBgn0261434	FBgn0050389	hkb	CG30389	PDI: Transcription factor-Gene	0.5335	-	CG30389	hkb	21177974	http://www.ncbi.nlm.nih.gov/sites/entrez?cmd=retrieve&db=pubmed&list_uids=21177974&dopt=DocSum	http://www.modencode.org/White.shtml	21177974(MI:0225(ChIP-chip) and ChIP-seq)	null	modENCODE-24-JAN-11	http://www.modencode.org/White.shtml	2014-10-01	pd
FBgn0261434	FBgn0036892	hkb	Lon	PDI: Transcription factor-Gene	0.3816	-	Lon	hkb	21177974	http://www.ncbi.nlm.nih.gov/sites/entrez?cmd=retrieve&db=pubmed&list_uids=21177974&dopt=DocSum	http://www.modencode.org/White.shtml	21177974(MI:0225(ChIP-chip) and ChIP-seq)	null	modENCODE-24-JAN-11	http://www.modencode.org/White.shtml	2014-10-01	pd
FBgn0261434	FBgn0037734	hkb	trbd	PDI: Transcription factor-Gene	-0.0849	-	trbd	hkb	21177974	http://www.ncbi.nlm.nih.gov/sites/entrez?cmd=retrieve&db=pubmed&list_uids=21177974&dopt=DocSum	http://www.modencode.org/White.shtml	21177974(MI:0225(ChIP-chip) and ChIP-seq)	null	modENCODE-24-JAN-11	http://www.modencode.org/White.shtml	2014-10-01	pd
FBgn0261434	FBgn0036893	hkb	PIG-F	PDI: Transcription factor-Gene	-0.0775	-	CG9376	hkb	21177974	http://www.ncbi.nlm.nih.gov/sites/entrez?cmd=retrieve&db=pubmed&list_uids=21177974&dopt=DocSum	http://www.modencode.org/White.shtml	21177974(MI:0225(ChIP-chip) and ChIP-seq)	null	modENCODE-24-JAN-11	http://www.modencode.org/White.shtml	2014-10-01	pd
FBgn0261434	FBgn0053111	hkb	CG33111	PDI: Transcription factor-Gene	-0.241	-	CG33111	hkb	21177974	http://www.ncbi.nlm.nih.gov/sites/entrez?cmd=retrieve&db=pubmed&list_uids=21177974&dopt=DocSum	http://www.modencode.org/White.shtml	21177974(MI:0225(ChIP-chip) and ChIP-seq)	null	modENCODE-24-JAN-11	http://www.modencode.org/White.shtml	2014-10-01	pd
FBgn0261434	FBgn0037371	hkb	Sym	PDI: Transcription factor-Gene	0.4873	-	Sym	hkb	21177974	http://www.ncbi.nlm.nih.gov/sites/entrez?cmd=retrieve&db=pubmed&list_uids=21177974&dopt=DocSum	http://www.modencode.org/White.shtml	21177974(MI:0225(ChIP-chip) and ChIP-seq)	null	modENCODE-24-JAN-11	http://www.modencode.org/White.shtml	2014-10-01	pd
FBgn0261434	FBgn0004650	hkb	fs(1)N	PDI: Transcription factor-Gene	-0.1196	-	fs(1)N	hkb	21177974	http://www.ncbi.nlm.nih.gov/sites/entrez?cmd=retrieve&db=pubmed&list_uids=21177974&dopt=DocSum	http://www.modencode.org/White.shtml	21177974(MI:0225(ChIP-chip) and ChIP-seq)	null	modENCODE-24-JAN-11	http://www.modencode.org/White.shtml	2014-10-01	pd
FBgn0261434	FBgn0053113	hkb	Rtnl1	PDI: Transcription factor-Gene	0.1448	-	Rtnl1	hkb	21177974	http://www.ncbi.nlm.nih.gov/sites/entrez?cmd=retrieve&db=pubmed&list_uids=21177974&dopt=DocSum	http://www.modencode.org/White.shtml	21177974(MI:0225(ChIP-chip) and ChIP-seq)	null	modENCODE-24-JAN-11	http://www.modencode.org/White.shtml	2014-10-01	pd
FBgn0261434	FBgn0037731	hkb	CG18542	PDI: Transcription factor-Gene	0.3946	-	CG18542	hkb	21177974	http://www.ncbi.nlm.nih.gov/sites/entrez?cmd=retrieve&db=pubmed&list_uids=21177974&dopt=DocSum	http://www.modencode.org/White.shtml	21177974(MI:0225(ChIP-chip) and ChIP-seq)	null	modENCODE-24-JAN-11	http://www.modencode.org/White.shtml	2014-10-01	pd
FBgn0261434	FBgn0000115	hkb	Arl1	PDI: Transcription factor-Gene	0.3104	-	Arl1	hkb	21177974	http://www.ncbi.nlm.nih.gov/sites/entrez?cmd=retrieve&db=pubmed&list_uids=21177974&dopt=DocSum	http://www.modencode.org/White.shtml	21177974(MI:0225(ChIP-chip) and ChIP-seq)	null	modENCODE-24-JAN-11	http://www.modencode.org/White.shtml	2014-10-01	pd
FBgn0261434	FBgn0031633	hkb	Fnta	PDI: Transcription factor-Gene	0.1123	-	Fnta	hkb	21177974	http://www.ncbi.nlm.nih.gov/sites/entrez?cmd=retrieve&db=pubmed&list_uids=21177974&dopt=DocSum	http://www.modencode.org/White.shtml	21177974(MI:0225(ChIP-chip) and ChIP-seq)	null	modENCODE-24-JAN-11	http://www.modencode.org/White.shtml	2014-10-01	pd
FBgn0261434	FBgn0036899	hkb	tey	PDI: Transcription factor-Gene	0.3028	-	tey	hkb	21177974	http://www.ncbi.nlm.nih.gov/sites/entrez?cmd=retrieve&db=pubmed&list_uids=21177974&dopt=DocSum	http://www.modencode.org/White.shtml	21177974(MI:0225(ChIP-chip) and ChIP-seq)	null	modENCODE-24-JAN-11	http://www.modencode.org/White.shtml	2014-10-01	pd
FBgn0261434	FBgn0263929	hkb	jvl	PDI: Transcription factor-Gene	-0.1934	-	jvl	hkb	21177974	http://www.ncbi.nlm.nih.gov/sites/entrez?cmd=retrieve&db=pubmed&list_uids=21177974&dopt=DocSum	http://www.modencode.org/White.shtml	21177974(MI:0225(ChIP-chip) and ChIP-seq)	null	modENCODE-24-JAN-11	http://www.modencode.org/White.shtml	2014-10-01	pd
FBgn0261434	FBgn0004395	hkb	unk	PDI: Transcription factor-Gene	0.6444	-	unk	hkb	21177974	http://www.ncbi.nlm.nih.gov/sites/entrez?cmd=retrieve&db=pubmed&list_uids=21177974&dopt=DocSum	http://www.modencode.org/White.shtml	21177974(MI:0225(ChIP-chip) and ChIP-seq)	null	modENCODE-24-JAN-11	http://www.modencode.org/White.shtml	2014-10-01	pd
FBgn0261434	FBgn0031635	hkb	tank	PDI: Transcription factor-Gene	0.3293	-	tank	hkb	21177974	http://www.ncbi.nlm.nih.gov/sites/entrez?cmd=retrieve&db=pubmed&list_uids=21177974&dopt=DocSum	http://www.modencode.org/White.shtml	21177974(MI:0225(ChIP-chip) and ChIP-seq)	null	modENCODE-24-JAN-11	http://www.modencode.org/White.shtml	2014-10-01	pd
FBgn0261434	FBgn0003520	hkb	stau	PDI: Transcription factor-Gene	0.6323	-	stau	hkb	21177974	http://www.ncbi.nlm.nih.gov/sites/entrez?cmd=retrieve&db=pubmed&list_uids=21177974&dopt=DocSum	http://www.modencode.org/White.shtml	21177974(MI:0225(ChIP-chip) and ChIP-seq)	null	modENCODE-24-JAN-11	http://www.modencode.org/White.shtml	2014-10-01	pd
FBgn0261434	FBgn0051224	hkb	CG31224	PDI: Transcription factor-Gene	0.3614	-	CG31224	hkb	21177974	http://www.ncbi.nlm.nih.gov/sites/entrez?cmd=retrieve&db=pubmed&list_uids=21177974&dopt=DocSum	http://www.modencode.org/White.shtml	21177974(MI:0225(ChIP-chip) and ChIP-seq)	null	modENCODE-24-JAN-11	http://www.modencode.org/White.shtml	2014-10-01	pd
FBgn0261434	FBgn0004656	hkb	fs(1)h	PDI: Transcription factor-Gene	0.8534	-	fs(1)h	hkb	21177974	http://www.ncbi.nlm.nih.gov/sites/entrez?cmd=retrieve&db=pubmed&list_uids=21177974&dopt=DocSum	http://www.modencode.org/White.shtml	21177974(MI:0225(ChIP-chip) and ChIP-seq)	null	modENCODE-24-JAN-11	http://www.modencode.org/White.shtml	2014-10-01	pd
FBgn0261434	FBgn0004655	hkb	wapl	PDI: Transcription factor-Gene	0.4469	-	wapl	hkb	21177974	http://www.ncbi.nlm.nih.gov/sites/entrez?cmd=retrieve&db=pubmed&list_uids=21177974&dopt=DocSum	http://www.modencode.org/White.shtml	21177974(MI:0225(ChIP-chip) and ChIP-seq)	null	modENCODE-24-JAN-11	http://www.modencode.org/White.shtml	2014-10-01	pd
FBgn0261434	FBgn0031636	hkb	CG12194	PDI: Transcription factor-Gene	0.0847	-	CG12194	hkb	21177974	http://www.ncbi.nlm.nih.gov/sites/entrez?cmd=retrieve&db=pubmed&list_uids=21177974&dopt=DocSum	http://www.modencode.org/White.shtml	21177974(MI:0225(ChIP-chip) and ChIP-seq)	null	modENCODE-24-JAN-11	http://www.modencode.org/White.shtml	2014-10-01	pd
FBgn0261434	FBgn0004397	hkb	Vinc	PDI: Transcription factor-Gene	-0.367	-	Vinc	hkb	21177974	http://www.ncbi.nlm.nih.gov/sites/entrez?cmd=retrieve&db=pubmed&list_uids=21177974&dopt=DocSum	http://www.modencode.org/White.shtml	21177974(MI:0225(ChIP-chip) and ChIP-seq)	null	modENCODE-24-JAN-11	http://www.modencode.org/White.shtml	2014-10-01	pd
FBgn0261434	FBgn0023172	hkb	RhoGEF2	PDI: Transcription factor-Gene	-0.0769	-	RhoGEF2	hkb	21177974	http://www.ncbi.nlm.nih.gov/sites/entrez?cmd=retrieve&db=pubmed&list_uids=21177974&dopt=DocSum	http://www.modencode.org/White.shtml	21177974(MI:0225(ChIP-chip) and ChIP-seq)	null	modENCODE-24-JAN-11	http://www.modencode.org/White.shtml	2014-10-01	pd
FBgn0261434	FBgn0004657	hkb	mys	PDI: Transcription factor-Gene	0.0978	-	mys	hkb	21177974	http://www.ncbi.nlm.nih.gov/sites/entrez?cmd=retrieve&db=pubmed&list_uids=21177974&dopt=DocSum	http://www.modencode.org/White.shtml	21177974(MI:0225(ChIP-chip) and ChIP-seq)	null	modENCODE-24-JAN-11	http://www.modencode.org/White.shtml	2014-10-01	pd
FBgn0261434	FBgn0003517	hkb	sta	PDI: Transcription factor-Gene	0.1201	-	sta	hkb	21177974	http://www.ncbi.nlm.nih.gov/sites/entrez?cmd=retrieve&db=pubmed&list_uids=21177974&dopt=DocSum	http://www.modencode.org/White.shtml	21177974(MI:0225(ChIP-chip) and ChIP-seq)	null	modENCODE-24-JAN-11	http://www.modencode.org/White.shtml	2014-10-01	pd
FBgn0261434	FBgn0004390	hkb	RasGAP1	PDI: Transcription factor-Gene	0.7924	-	RasGAP1	hkb	21177974	http://www.ncbi.nlm.nih.gov/sites/entrez?cmd=retrieve&db=pubmed&list_uids=21177974&dopt=DocSum	http://www.modencode.org/White.shtml	21177974(MI:0225(ChIP-chip) and ChIP-seq)	null	modENCODE-24-JAN-11	http://www.modencode.org/White.shtml	2014-10-01	pd
FBgn0261434	FBgn0035617	hkb	l(3)psg2	PDI: Transcription factor-Gene	0.6772	-	l(3)psg2	hkb	21177974	http://www.ncbi.nlm.nih.gov/sites/entrez?cmd=retrieve&db=pubmed&list_uids=21177974&dopt=DocSum	http://www.modencode.org/White.shtml	21177974(MI:0225(ChIP-chip) and ChIP-seq)	null	modENCODE-24-JAN-11	http://www.modencode.org/White.shtml	2014-10-01	pd
FBgn0261434	FBgn0031643	hkb	CG3008	PDI: Transcription factor-Gene	0.028	-	CG3008	hkb	21177974	http://www.ncbi.nlm.nih.gov/sites/entrez?cmd=retrieve&db=pubmed&list_uids=21177974&dopt=DocSum	http://www.modencode.org/White.shtml	21177974(MI:0225(ChIP-chip) and ChIP-seq)	null	modENCODE-24-JAN-11	http://www.modencode.org/White.shtml	2014-10-01	pd
FBgn0261434	FBgn0263346	hkb	CG43427	PDI: Transcription factor-Gene	-0.0475	-	CG43427	hkb	21177974	http://www.ncbi.nlm.nih.gov/sites/entrez?cmd=retrieve&db=pubmed&list_uids=21177974&dopt=DocSum	http://www.modencode.org/White.shtml	21177974(MI:0225(ChIP-chip) and ChIP-seq)	null	modENCODE-24-JAN-11	http://www.modencode.org/White.shtml	2014-10-01	pd
FBgn0261434	FBgn0019925	hkb	Surf4	PDI: Transcription factor-Gene	-0.2059	-	Surf4	hkb	21177974	http://www.ncbi.nlm.nih.gov/sites/entrez?cmd=retrieve&db=pubmed&list_uids=21177974&dopt=DocSum	http://www.modencode.org/White.shtml	21177974(MI:0225(ChIP-chip) and ChIP-seq)	null	modENCODE-24-JAN-11	http://www.modencode.org/White.shtml	2014-10-01	pd
FBgn0261434	FBgn0263121	hkb	Prosalpha1	PDI: Transcription factor-Gene	-	-	ProsŒ±1	hkb	21177974	http://www.ncbi.nlm.nih.gov/sites/entrez?cmd=retrieve&db=pubmed&list_uids=21177974&dopt=DocSum	http://www.modencode.org/White.shtml	21177974(MI:0225(ChIP-chip) and ChIP-seq)	null	modENCODE-24-JAN-11	http://www.modencode.org/White.shtml	2014-10-01	pd
FBgn0261434	FBgn0020621	hkb	Pkn	PDI: Transcription factor-Gene	0.0273	-	Pkn	hkb	21177974	http://www.ncbi.nlm.nih.gov/sites/entrez?cmd=retrieve&db=pubmed&list_uids=21177974&dopt=DocSum	http://www.modencode.org/White.shtml	21177974(MI:0225(ChIP-chip) and ChIP-seq)	null	modENCODE-24-JAN-11	http://www.modencode.org/White.shtml	2014-10-01	pd
FBgn0261434	FBgn0010762	hkb	simj	PDI: Transcription factor-Gene	0.6774	-	simj	hkb	21177974	http://www.ncbi.nlm.nih.gov/sites/entrez?cmd=retrieve&db=pubmed&list_uids=21177974&dopt=DocSum	http://www.modencode.org/White.shtml	21177974(MI:0225(ChIP-chip) and ChIP-seq)	null	modENCODE-24-JAN-11	http://www.modencode.org/White.shtml	2014-10-01	pd
FBgn0261434	FBgn0033616	hkb	CG7745	PDI: Transcription factor-Gene	0.0629	-	CG7745	hkb	21177974	http://www.ncbi.nlm.nih.gov/sites/entrez?cmd=retrieve&db=pubmed&list_uids=21177974&dopt=DocSum	http://www.modencode.org/White.shtml	21177974(MI:0225(ChIP-chip) and ChIP-seq)	null	modENCODE-24-JAN-11	http://www.modencode.org/White.shtml	2014-10-01	pd
FBgn0261434	FBgn0050105	hkb	CG30105	PDI: Transcription factor-Gene	0.7263	-	CG30105	hkb	21177974	http://www.ncbi.nlm.nih.gov/sites/entrez?cmd=retrieve&db=pubmed&list_uids=21177974&dopt=DocSum	http://www.modencode.org/White.shtml	21177974(MI:0225(ChIP-chip) and ChIP-seq)	null	modENCODE-24-JAN-11	http://www.modencode.org/White.shtml	2014-10-01	pd
FBgn0261434	FBgn0016696	hkb	Pitslre	PDI: Transcription factor-Gene	0.5395	-	Pitslre	hkb	21177974	http://www.ncbi.nlm.nih.gov/sites/entrez?cmd=retrieve&db=pubmed&list_uids=21177974&dopt=DocSum	http://www.modencode.org/White.shtml	21177974(MI:0225(ChIP-chip) and ChIP-seq)	null	modENCODE-24-JAN-11	http://www.modencode.org/White.shtml	2014-10-01	pd
FBgn0261434	FBgn0263108	hkb	BtbVII	PDI: Transcription factor-Gene	0.0838	-	BtbVII	hkb	21177974	http://www.ncbi.nlm.nih.gov/sites/entrez?cmd=retrieve&db=pubmed&list_uids=21177974&dopt=DocSum	http://www.modencode.org/White.shtml	21177974(MI:0225(ChIP-chip) and ChIP-seq)	null	modENCODE-24-JAN-11	http://www.modencode.org/White.shtml	2014-10-01	pd
FBgn0261434	FBgn0037746	hkb	CG8478	PDI: Transcription factor-Gene	0.6048	-	CG8478	hkb	21177974	http://www.ncbi.nlm.nih.gov/sites/entrez?cmd=retrieve&db=pubmed&list_uids=21177974&dopt=DocSum	http://www.modencode.org/White.shtml	21177974(MI:0225(ChIP-chip) and ChIP-seq)	null	modENCODE-24-JAN-11	http://www.modencode.org/White.shtml	2014-10-01	pd
FBgn0261434	FBgn0263933	hkb	ebi	PDI: Transcription factor-Gene	0.5772	-	ebi	hkb	21177974	http://www.ncbi.nlm.nih.gov/sites/entrez?cmd=retrieve&db=pubmed&list_uids=21177974&dopt=DocSum	http://www.modencode.org/White.shtml	21177974(MI:0225(ChIP-chip) and ChIP-seq)	null	modENCODE-24-JAN-11	http://www.modencode.org/White.shtml	2014-10-01	pd
FBgn0261434	FBgn0035877	hkb	CG7083	PDI: Transcription factor-Gene	-0.1509	-	CG7083	hkb	21177974	http://www.ncbi.nlm.nih.gov/sites/entrez?cmd=retrieve&db=pubmed&list_uids=21177974&dopt=DocSum	http://www.modencode.org/White.shtml	21177974(MI:0225(ChIP-chip) and ChIP-seq)	null	modENCODE-24-JAN-11	http://www.modencode.org/White.shtml	2014-10-01	pd
FBgn0261434	FBgn0011818	hkb	oaf	PDI: Transcription factor-Gene	0.4482	-	oaf	hkb	21177974	http://www.ncbi.nlm.nih.gov/sites/entrez?cmd=retrieve&db=pubmed&list_uids=21177974&dopt=DocSum	http://www.modencode.org/White.shtml	21177974(MI:0225(ChIP-chip) and ChIP-seq)	null	modENCODE-24-JAN-11	http://www.modencode.org/White.shtml	2014-10-01	pd
FBgn0261434	FBgn0261986	hkb	RASSF8	PDI: Transcription factor-Gene	0.3964	-	RASSF8	hkb	21177974	http://www.ncbi.nlm.nih.gov/sites/entrez?cmd=retrieve&db=pubmed&list_uids=21177974&dopt=DocSum	http://www.modencode.org/White.shtml	21177974(MI:0225(ChIP-chip) and ChIP-seq)	null	modENCODE-24-JAN-11	http://www.modencode.org/White.shtml	2014-10-01	pd
FBgn0261434	FBgn0037747	hkb	CG8481	PDI: Transcription factor-Gene	-0.1465	-	CG8481	hkb	21177974	http://www.ncbi.nlm.nih.gov/sites/entrez?cmd=retrieve&db=pubmed&list_uids=21177974&dopt=DocSum	http://www.modencode.org/White.shtml	21177974(MI:0225(ChIP-chip) and ChIP-seq)	null	modENCODE-24-JAN-11	http://www.modencode.org/White.shtml	2014-10-01	pd
FBgn0261434	FBgn0261988	hkb	Gprk2	PDI: Transcription factor-Gene	0.5443	-	Gprk2	hkb	21177974	http://www.ncbi.nlm.nih.gov/sites/entrez?cmd=retrieve&db=pubmed&list_uids=21177974&dopt=DocSum	http://www.modencode.org/White.shtml	21177974(MI:0225(ChIP-chip) and ChIP-seq)	null	modENCODE-24-JAN-11	http://www.modencode.org/White.shtml	2014-10-01	pd
FBgn0261434	FBgn0036212	hkb	CG11597	PDI: Transcription factor-Gene	0.341	-	CG11597	hkb	21177974	http://www.ncbi.nlm.nih.gov/sites/entrez?cmd=retrieve&db=pubmed&list_uids=21177974&dopt=DocSum	http://www.modencode.org/White.shtml	21177974(MI:0225(ChIP-chip) and ChIP-seq)	null	modENCODE-24-JAN-11	http://www.modencode.org/White.shtml	2014-10-01	pd
FBgn0261434	FBgn0036213	hkb	RpL10Ab	PDI: Transcription factor-Gene	0.0536	-	RpL10Ab	hkb	21177974	http://www.ncbi.nlm.nih.gov/sites/entrez?cmd=retrieve&db=pubmed&list_uids=21177974&dopt=DocSum	http://www.modencode.org/White.shtml	21177974(MI:0225(ChIP-chip) and ChIP-seq)	null	modENCODE-24-JAN-11	http://www.modencode.org/White.shtml	2014-10-01	pd
FBgn0261434	FBgn0003510	hkb	Sry-alpha	PDI: Transcription factor-Gene	0.5973	-	Sry-Œ±	hkb	21177974	http://www.ncbi.nlm.nih.gov/sites/entrez?cmd=retrieve&db=pubmed&list_uids=21177974&dopt=DocSum	http://www.modencode.org/White.shtml	21177974(MI:0225(ChIP-chip) and ChIP-seq)	null	modENCODE-24-JAN-11	http://www.modencode.org/White.shtml	2014-10-01	pd
FBgn0261434	FBgn0000233	hkb	btd	PDI: Transcription factor-Gene	0.9815	-	btd	hkb	21177974	http://www.ncbi.nlm.nih.gov/sites/entrez?cmd=retrieve&db=pubmed&list_uids=21177974&dopt=DocSum	http://www.modencode.org/White.shtml	21177974(MI:0225(ChIP-chip) and ChIP-seq)	null	modENCODE-24-JAN-11	http://www.modencode.org/White.shtml	2014-10-01	pd
FBgn0261434	FBgn0036211	hkb	CG5946	PDI: Transcription factor-Gene	-0.2498	-	CG5946	hkb	21177974	http://www.ncbi.nlm.nih.gov/sites/entrez?cmd=retrieve&db=pubmed&list_uids=21177974&dopt=DocSum	http://www.modencode.org/White.shtml	21177974(MI:0225(ChIP-chip) and ChIP-seq)	null	modENCODE-24-JAN-11	http://www.modencode.org/White.shtml	2014-10-01	pd
FBgn0261434	FBgn0004643	hkb	Zw10	PDI: Transcription factor-Gene	0.2344	-	Zw10	hkb	21177974	http://www.ncbi.nlm.nih.gov/sites/entrez?cmd=retrieve&db=pubmed&list_uids=21177974&dopt=DocSum	http://www.modencode.org/White.shtml	21177974(MI:0225(ChIP-chip) and ChIP-seq)	null	modENCODE-24-JAN-11	http://www.modencode.org/White.shtml	2014-10-01	pd
FBgn0261434	FBgn0036887	hkb	CG9231	PDI: Transcription factor-Gene	-0.368	-	CG9231	hkb	21177974	http://www.ncbi.nlm.nih.gov/sites/entrez?cmd=retrieve&db=pubmed&list_uids=21177974&dopt=DocSum	http://www.modencode.org/White.shtml	21177974(MI:0225(ChIP-chip) and ChIP-seq)	null	modENCODE-24-JAN-11	http://www.modencode.org/White.shtml	2014-10-01	pd
FBgn0261434	FBgn0036888	hkb	CG9330	PDI: Transcription factor-Gene	0.134	-	CG9330	hkb	21177974	http://www.ncbi.nlm.nih.gov/sites/entrez?cmd=retrieve&db=pubmed&list_uids=21177974&dopt=DocSum	http://www.modencode.org/White.shtml	21177974(MI:0225(ChIP-chip) and ChIP-seq)	null	modENCODE-24-JAN-11	http://www.modencode.org/White.shtml	2014-10-01	pd
FBgn0261434	FBgn0003513	hkb	ss	PDI: Transcription factor-Gene	0.1036	-	ss	hkb	21177974	http://www.ncbi.nlm.nih.gov/sites/entrez?cmd=retrieve&db=pubmed&list_uids=21177974&dopt=DocSum	http://www.modencode.org/White.shtml	21177974(MI:0225(ChIP-chip) and ChIP-seq)	null	modENCODE-24-JAN-11	http://www.modencode.org/White.shtml	2014-10-01	pd
FBgn0261434	FBgn0004648	hkb	svr	PDI: Transcription factor-Gene	-0.1558	-	svr	hkb	21177974	http://www.ncbi.nlm.nih.gov/sites/entrez?cmd=retrieve&db=pubmed&list_uids=21177974&dopt=DocSum	http://www.modencode.org/White.shtml	21177974(MI:0225(ChIP-chip) and ChIP-seq)	null	modENCODE-24-JAN-11	http://www.modencode.org/White.shtml	2014-10-01	pd
FBgn0261434	FBgn0004647	hkb	N	PDI: Transcription factor-Gene	0.7877	-	N	hkb	21177974	http://www.ncbi.nlm.nih.gov/sites/entrez?cmd=retrieve&db=pubmed&list_uids=21177974&dopt=DocSum	http://www.modencode.org/White.shtml	21177974(MI:0225(ChIP-chip) and ChIP-seq)	null	modENCODE-24-JAN-11	http://www.modencode.org/White.shtml	2014-10-01	pd
FBgn0261434	FBgn0039402	hkb	Vps2	PDI: Transcription factor-Gene	-0.1527	-	Vps2	hkb	21177974	http://www.ncbi.nlm.nih.gov/sites/entrez?cmd=retrieve&db=pubmed&list_uids=21177974&dopt=DocSum	http://www.modencode.org/White.shtml	21177974(MI:0225(ChIP-chip) and ChIP-seq)	null	modENCODE-24-JAN-11	http://www.modencode.org/White.shtml	2014-10-01	pd
FBgn0261434	FBgn0003507	hkb	srp	PDI: Transcription factor-Gene	0.4077	-	srp	hkb	21177974	http://www.ncbi.nlm.nih.gov/sites/entrez?cmd=retrieve&db=pubmed&list_uids=21177974&dopt=DocSum	http://www.modencode.org/White.shtml	21177974(MI:0225(ChIP-chip) and ChIP-seq)	null	modENCODE-24-JAN-11	http://www.modencode.org/White.shtml	2014-10-01	pd
FBgn0261434	FBgn0039406	hkb	RpL34a	PDI: Transcription factor-Gene	0.2329	-	RpL34a	hkb	21177974	http://www.ncbi.nlm.nih.gov/sites/entrez?cmd=retrieve&db=pubmed&list_uids=21177974&dopt=DocSum	http://www.modencode.org/White.shtml	21177974(MI:0225(ChIP-chip) and ChIP-seq)	null	modENCODE-24-JAN-11	http://www.modencode.org/White.shtml	2014-10-01	pd
FBgn0261434	FBgn0004102	hkb	oc	PDI: Transcription factor-Gene	0.6137	-	oc	hkb	21177974	http://www.ncbi.nlm.nih.gov/sites/entrez?cmd=retrieve&db=pubmed&list_uids=21177974&dopt=DocSum	http://www.modencode.org/White.shtml	21177974(MI:0225(ChIP-chip) and ChIP-seq)	null	modENCODE-24-JAN-11	http://www.modencode.org/White.shtml	2014-10-01	pd
FBgn0261434	FBgn0039407	hkb	CG14544	PDI: Transcription factor-Gene	0.4669	-	CG14544	hkb	21177974	http://www.ncbi.nlm.nih.gov/sites/entrez?cmd=retrieve&db=pubmed&list_uids=21177974&dopt=DocSum	http://www.modencode.org/White.shtml	21177974(MI:0225(ChIP-chip) and ChIP-seq)	null	modENCODE-24-JAN-11	http://www.modencode.org/White.shtml	2014-10-01	pd
FBgn0261434	FBgn0030500	hkb	Ndc80	PDI: Transcription factor-Gene	0.5753	-	Ndc80	hkb	21177974	http://www.ncbi.nlm.nih.gov/sites/entrez?cmd=retrieve&db=pubmed&list_uids=21177974&dopt=DocSum	http://www.modencode.org/White.shtml	21177974(MI:0225(ChIP-chip) and ChIP-seq)	null	modENCODE-24-JAN-11	http://www.modencode.org/White.shtml	2014-10-01	pd
FBgn0261434	FBgn0050382	hkb	CG30382	PDI: Transcription factor-Gene	-0.2034	-	CG30382	hkb	21177974	http://www.ncbi.nlm.nih.gov/sites/entrez?cmd=retrieve&db=pubmed&list_uids=21177974&dopt=DocSum	http://www.modencode.org/White.shtml	21177974(MI:0225(ChIP-chip) and ChIP-seq)	null	modENCODE-24-JAN-11	http://www.modencode.org/White.shtml	2014-10-01	pd
FBgn0261434	FBgn0030501	hkb	BthD	PDI: Transcription factor-Gene	0.7372	-	BthD	hkb	21177974	http://www.ncbi.nlm.nih.gov/sites/entrez?cmd=retrieve&db=pubmed&list_uids=21177974&dopt=DocSum	http://www.modencode.org/White.shtml	21177974(MI:0225(ChIP-chip) and ChIP-seq)	null	modENCODE-24-JAN-11	http://www.modencode.org/White.shtml	2014-10-01	pd
FBgn0261434	FBgn0004103	hkb	Pp1-87B	PDI: Transcription factor-Gene	0.6315	-	Pp1-87B	hkb	21177974	http://www.ncbi.nlm.nih.gov/sites/entrez?cmd=retrieve&db=pubmed&list_uids=21177974&dopt=DocSum	http://www.modencode.org/White.shtml	21177974(MI:0225(ChIP-chip) and ChIP-seq)	null	modENCODE-24-JAN-11	http://www.modencode.org/White.shtml	2014-10-01	pd
FBgn0261434	FBgn0037188	hkb	CG7369	PDI: Transcription factor-Gene	0.199	-	CG7369	hkb	21177974	http://www.ncbi.nlm.nih.gov/sites/entrez?cmd=retrieve&db=pubmed&list_uids=21177974&dopt=DocSum	http://www.modencode.org/White.shtml	21177974(MI:0225(ChIP-chip) and ChIP-seq)	null	modENCODE-24-JAN-11	http://www.modencode.org/White.shtml	2014-10-01	pd
FBgn0261434	FBgn0033605	hkb	CG9067	PDI: Transcription factor-Gene	0.1953	-	CG9067	hkb	21177974	http://www.ncbi.nlm.nih.gov/sites/entrez?cmd=retrieve&db=pubmed&list_uids=21177974&dopt=DocSum	http://www.modencode.org/White.shtml	21177974(MI:0225(ChIP-chip) and ChIP-seq)	null	modENCODE-24-JAN-11	http://www.modencode.org/White.shtml	2014-10-01	pd
FBgn0261434	FBgn0033897	hkb	Rcd1	PDI: Transcription factor-Gene	0.6545	-	Rcd1	hkb	21177974	http://www.ncbi.nlm.nih.gov/sites/entrez?cmd=retrieve&db=pubmed&list_uids=21177974&dopt=DocSum	http://www.modencode.org/White.shtml	21177974(MI:0225(ChIP-chip) and ChIP-seq)	null	modENCODE-24-JAN-11	http://www.modencode.org/White.shtml	2014-10-01	pd
FBgn0261434	FBgn0004108	hkb	Nrt	PDI: Transcription factor-Gene	0.8511	-	Nrt	hkb	21177974	http://www.ncbi.nlm.nih.gov/sites/entrez?cmd=retrieve&db=pubmed&list_uids=21177974&dopt=DocSum	http://www.modencode.org/White.shtml	21177974(MI:0225(ChIP-chip) and ChIP-seq)	null	modENCODE-24-JAN-11	http://www.modencode.org/White.shtml	2014-10-01	pd
FBgn0261434	FBgn0039827	hkb	CG1544	PDI: Transcription factor-Gene	-0.159	-	CG1544	hkb	21177974	http://www.ncbi.nlm.nih.gov/sites/entrez?cmd=retrieve&db=pubmed&list_uids=21177974&dopt=DocSum	http://www.modencode.org/White.shtml	21177974(MI:0225(ChIP-chip) and ChIP-seq)	null	modENCODE-24-JAN-11	http://www.modencode.org/White.shtml	2014-10-01	pd
FBgn0261434	FBgn0032512	hkb	Bdp1	PDI: Transcription factor-Gene	0.3092	-	CG9305	hkb	21177974	http://www.ncbi.nlm.nih.gov/sites/entrez?cmd=retrieve&db=pubmed&list_uids=21177974&dopt=DocSum	http://www.modencode.org/White.shtml	21177974(MI:0225(ChIP-chip) and ChIP-seq)	null	modENCODE-24-JAN-11	http://www.modencode.org/White.shtml	2014-10-01	pd
FBgn0261434	FBgn0011227	hkb	ox	PDI: Transcription factor-Gene	-0.3173	-	ox	hkb	21177974	http://www.ncbi.nlm.nih.gov/sites/entrez?cmd=retrieve&db=pubmed&list_uids=21177974&dopt=DocSum	http://www.modencode.org/White.shtml	21177974(MI:0225(ChIP-chip) and ChIP-seq)	null	modENCODE-24-JAN-11	http://www.modencode.org/White.shtml	2014-10-01	pd
FBgn0261434	FBgn0262459	hkb	mir-34	PDI: Transcription factor-Gene	-	-	mir-34	hkb	21177974	http://www.ncbi.nlm.nih.gov/sites/entrez?cmd=retrieve&db=pubmed&list_uids=21177974&dopt=DocSum	http://www.modencode.org/White.shtml	21177974(MI:0225(ChIP-chip) and ChIP-seq)	null	modENCODE-24-JAN-11	http://www.modencode.org/White.shtml	2014-10-01	pd
FBgn0261434	FBgn0266557	hkb	kis	PDI: Transcription factor-Gene	0.7927	-	kis	hkb	21177974	http://www.ncbi.nlm.nih.gov/sites/entrez?cmd=retrieve&db=pubmed&list_uids=21177974&dopt=DocSum	http://www.modencode.org/White.shtml	21177974(MI:0225(ChIP-chip) and ChIP-seq)	null	modENCODE-24-JAN-11	http://www.modencode.org/White.shtml	2014-10-01	pd
FBgn0261434	FBgn0011225	hkb	jar	PDI: Transcription factor-Gene	0.2402	-	jar	hkb	21177974	http://www.ncbi.nlm.nih.gov/sites/entrez?cmd=retrieve&db=pubmed&list_uids=21177974&dopt=DocSum	http://www.modencode.org/White.shtml	21177974(MI:0225(ChIP-chip) and ChIP-seq)	null	modENCODE-24-JAN-11	http://www.modencode.org/White.shtml	2014-10-01	pd
FBgn0261434	FBgn0000247	hkb	ca	PDI: Transcription factor-Gene	0.5849	-	ca	hkb	21177974	http://www.ncbi.nlm.nih.gov/sites/entrez?cmd=retrieve&db=pubmed&list_uids=21177974&dopt=DocSum	http://www.modencode.org/White.shtml	21177974(MI:0225(ChIP-chip) and ChIP-seq)	null	modENCODE-24-JAN-11	http://www.modencode.org/White.shtml	2014-10-01	pd
FBgn0261434	FBgn0005775	hkb	Con	PDI: Transcription factor-Gene	0.3785	-	Con	hkb	21177974	http://www.ncbi.nlm.nih.gov/sites/entrez?cmd=retrieve&db=pubmed&list_uids=21177974&dopt=DocSum	http://www.modencode.org/White.shtml	21177974(MI:0225(ChIP-chip) and ChIP-seq)	null	modENCODE-24-JAN-11	http://www.modencode.org/White.shtml	2014-10-01	pd
FBgn0261434	FBgn0038250	hkb	CG3505	PDI: Transcription factor-Gene	-0.3909	-	CG3505	hkb	21177974	http://www.ncbi.nlm.nih.gov/sites/entrez?cmd=retrieve&db=pubmed&list_uids=21177974&dopt=DocSum	http://www.modencode.org/White.shtml	21177974(MI:0225(ChIP-chip) and ChIP-seq)	null	modENCODE-24-JAN-11	http://www.modencode.org/White.shtml	2014-10-01	pd
FBgn0261434	FBgn0003502	hkb	Btk29A	PDI: Transcription factor-Gene	0.5715	-	Btk29A	hkb	21177974	http://www.ncbi.nlm.nih.gov/sites/entrez?cmd=retrieve&db=pubmed&list_uids=21177974&dopt=DocSum	http://www.modencode.org/White.shtml	21177974(MI:0225(ChIP-chip) and ChIP-seq)	null	modENCODE-24-JAN-11	http://www.modencode.org/White.shtml	2014-10-01	pd
FBgn0261434	FBgn0004638	hkb	drk	PDI: Transcription factor-Gene	0.6167	-	drk	hkb	21177974	http://www.ncbi.nlm.nih.gov/sites/entrez?cmd=retrieve&db=pubmed&list_uids=21177974&dopt=DocSum	http://www.modencode.org/White.shtml	21177974(MI:0225(ChIP-chip) and ChIP-seq)	null	modENCODE-24-JAN-11	http://www.modencode.org/White.shtml	2014-10-01	pd
FBgn0261434	FBgn0261573	hkb	CoRest	PDI: Transcription factor-Gene	0.6216	-	CoRest	hkb	21177974	http://www.ncbi.nlm.nih.gov/sites/entrez?cmd=retrieve&db=pubmed&list_uids=21177974&dopt=DocSum	http://www.modencode.org/White.shtml	21177974(MI:0225(ChIP-chip) and ChIP-seq)	null	modENCODE-24-JAN-11	http://www.modencode.org/White.shtml	2014-10-01	pd
FBgn0261434	FBgn0085319	hkb	CG34290	PDI: Transcription factor-Gene	-0.1594	-	CG34290	hkb	21177974	http://www.ncbi.nlm.nih.gov/sites/entrez?cmd=retrieve&db=pubmed&list_uids=21177974&dopt=DocSum	http://www.modencode.org/White.shtml	21177974(MI:0225(ChIP-chip) and ChIP-seq)	null	modENCODE-24-JAN-11	http://www.modencode.org/White.shtml	2014-10-01	pd
FBgn0261434	FBgn0038051	hkb	CG17207	PDI: Transcription factor-Gene	-0.3107	-	CG17207	hkb	21177974	http://www.ncbi.nlm.nih.gov/sites/entrez?cmd=retrieve&db=pubmed&list_uids=21177974&dopt=DocSum	http://www.modencode.org/White.shtml	21177974(MI:0225(ChIP-chip) and ChIP-seq)	null	modENCODE-24-JAN-11	http://www.modencode.org/White.shtml	2014-10-01	pd
FBgn0261434	FBgn0036222	hkb	SdhAL	PDI: Transcription factor-Gene	-0.1853	-	SdhAL	hkb	21177974	http://www.ncbi.nlm.nih.gov/sites/entrez?cmd=retrieve&db=pubmed&list_uids=21177974&dopt=DocSum	http://www.modencode.org/White.shtml	21177974(MI:0225(ChIP-chip) and ChIP-seq)	null	modENCODE-24-JAN-11	http://www.modencode.org/White.shtml	2014-10-01	pd
FBgn0261434	FBgn0260439	hkb	Pp2A-29B	PDI: Transcription factor-Gene	0.781	-	Pp2A-29B	hkb	21177974	http://www.ncbi.nlm.nih.gov/sites/entrez?cmd=retrieve&db=pubmed&list_uids=21177974&dopt=DocSum	http://www.modencode.org/White.shtml	21177974(MI:0225(ChIP-chip) and ChIP-seq)	null	modENCODE-24-JAN-11	http://www.modencode.org/White.shtml	2014-10-01	pd
FBgn0261434	FBgn0000447	hkb	Dhod	PDI: Transcription factor-Gene	-0.0425	-	Dhod	hkb	21177974	http://www.ncbi.nlm.nih.gov/sites/entrez?cmd=retrieve&db=pubmed&list_uids=21177974&dopt=DocSum	http://www.modencode.org/White.shtml	21177974(MI:0225(ChIP-chip) and ChIP-seq)	null	modENCODE-24-JAN-11	http://www.modencode.org/White.shtml	2014-10-01	pd
FBgn0261434	FBgn0030519	hkb	CG11151	PDI: Transcription factor-Gene	-0.4267	-	CG11151	hkb	21177974	http://www.ncbi.nlm.nih.gov/sites/entrez?cmd=retrieve&db=pubmed&list_uids=21177974&dopt=DocSum	http://www.modencode.org/White.shtml	21177974(MI:0225(ChIP-chip) and ChIP-seq)	null	modENCODE-24-JAN-11	http://www.modencode.org/White.shtml	2014-10-01	pd
FBgn0261434	FBgn0265082	hkb	Cdep	PDI: Transcription factor-Gene	-0.0806	-	Cdep	hkb	21177974	http://www.ncbi.nlm.nih.gov/sites/entrez?cmd=retrieve&db=pubmed&list_uids=21177974&dopt=DocSum	http://www.modencode.org/White.shtml	21177974(MI:0225(ChIP-chip) and ChIP-seq)	null	modENCODE-24-JAN-11	http://www.modencode.org/White.shtml	2014-10-01	pd
FBgn0261434	FBgn0033639	hkb	CG9003	PDI: Transcription factor-Gene	-0.1548	-	CG9003	hkb	21177974	http://www.ncbi.nlm.nih.gov/sites/entrez?cmd=retrieve&db=pubmed&list_uids=21177974&dopt=DocSum	http://www.modencode.org/White.shtml	21177974(MI:0225(ChIP-chip) and ChIP-seq)	null	modENCODE-24-JAN-11	http://www.modencode.org/White.shtml	2014-10-01	pd
FBgn0261434	FBgn0011217	hkb	eff	PDI: Transcription factor-Gene	0.3699	-	eff	hkb	21177974	http://www.ncbi.nlm.nih.gov/sites/entrez?cmd=retrieve&db=pubmed&list_uids=21177974&dopt=DocSum	http://www.modencode.org/White.shtml	21177974(MI:0225(ChIP-chip) and ChIP-seq)	null	modENCODE-24-JAN-11	http://www.modencode.org/White.shtml	2014-10-01	pd
FBgn0261434	FBgn0263706	hkb	CG43658	PDI: Transcription factor-Gene	0.0619	-	CG43658	hkb	21177974	http://www.ncbi.nlm.nih.gov/sites/entrez?cmd=retrieve&db=pubmed&list_uids=21177974&dopt=DocSum	http://www.modencode.org/White.shtml	21177974(MI:0225(ChIP-chip) and ChIP-seq)	null	modENCODE-24-JAN-11	http://www.modencode.org/White.shtml	2014-10-01	pd
FBgn0261434	FBgn0019949	hkb	Cdk9	PDI: Transcription factor-Gene	0.6865	-	Cdk9	hkb	21177974	http://www.ncbi.nlm.nih.gov/sites/entrez?cmd=retrieve&db=pubmed&list_uids=21177974&dopt=DocSum	http://www.modencode.org/White.shtml	21177974(MI:0225(ChIP-chip) and ChIP-seq)	null	modENCODE-24-JAN-11	http://www.modencode.org/White.shtml	2014-10-01	pd
FBgn0261434	FBgn0033636	hkb	tou	PDI: Transcription factor-Gene	0.7388	-	tou	hkb	21177974	http://www.ncbi.nlm.nih.gov/sites/entrez?cmd=retrieve&db=pubmed&list_uids=21177974&dopt=DocSum	http://www.modencode.org/White.shtml	21177974(MI:0225(ChIP-chip) and ChIP-seq)	null	modENCODE-24-JAN-11	http://www.modencode.org/White.shtml	2014-10-01	pd
FBgn0261434	FBgn0083953	hkb	CG34117	PDI: Transcription factor-Gene	0.1033	-	CG34117	hkb	21177974	http://www.ncbi.nlm.nih.gov/sites/entrez?cmd=retrieve&db=pubmed&list_uids=21177974&dopt=DocSum	http://www.modencode.org/White.shtml	21177974(MI:0225(ChIP-chip) and ChIP-seq)	null	modENCODE-24-JAN-11	http://www.modencode.org/White.shtml	2014-10-01	pd
FBgn0261434	FBgn0263144	hkb	bin3	PDI: Transcription factor-Gene	0.3079	-	bin3	hkb	21177974	http://www.ncbi.nlm.nih.gov/sites/entrez?cmd=retrieve&db=pubmed&list_uids=21177974&dopt=DocSum	http://www.modencode.org/White.shtml	21177974(MI:0225(ChIP-chip) and ChIP-seq)	null	modENCODE-24-JAN-11	http://www.modencode.org/White.shtml	2014-10-01	pd
FBgn0261434	FBgn0010551	hkb	Phb2	PDI: Transcription factor-Gene	-0.253	-	Phb2	hkb	21177974	http://www.ncbi.nlm.nih.gov/sites/entrez?cmd=retrieve&db=pubmed&list_uids=21177974&dopt=DocSum	http://www.modencode.org/White.shtml	21177974(MI:0225(ChIP-chip) and ChIP-seq)	null	modENCODE-24-JAN-11	http://www.modencode.org/White.shtml	2014-10-01	pd
[truncated: 120 more rows]

## Sheet: Hkb ChIP-Seq targets
Gene 1 Hkb	Gene 2	Gene Symbol
	FBgn0005585	Calr
	FBgn0265434	zip
	FBgn0015789	Rab10
	FBgn0027835	Dp1
	FBgn0052590	CG32590
	FBgn0012344	Dh44
	FBgn0039266	CG11791
	FBgn0264598	PsGEF
	FBgn0030088	Arfrp1
	FBgn0025608	Faf2
	FBgn0030873	CG15814
	FBgn0036935	CG14186
	FBgn0032940	Mondo
	FBgn0030089	AP-1g
	FBgn0030870	CG6398
[truncated: 1,253 more rows]

## Sheet: Functional Annotation Clusters
Functional Annotation Clustering
[truncated: 764 more rows]

[truncated: 1 more sheets: Gene List for Each Cluster]
